# Supplementary material for: Controlled monodefluorination and alkylation of C(sp3)–F bonds by lanthanide photocatalysts: importance of metal–ligand cooperativity
Source: Royal Society of Chemistry journal article supplement (doi:10.1039/d2sc04192h), 2022-01-01
Supplement: d2sc04192h1.pdf [file d2sc04192h1.pdf]

## Supporting Information

# Controlled Monodefluorination and Alkylation of C(sp<sup>3</sup>)-F Bonds by Lanthanide Photocatalysts: Importance of Metal – Ligand Cooperativity

Amy E. Kynman,<sup>[a,b]</sup> Luca K. Elghanayan,<sup>[a]†</sup> Addison N. Desnoyer,<sup>[a]</sup> Yan Yang,<sup>[c]</sup> Laurent Sévery,<sup>[a]</sup> Andrea Di Giuseppe,<sup>[a]</sup> T. Don Tilley,<sup>[a]</sup> Laurent Maron<sup>[c]\*</sup> and Polly L. Arnold<sup>[a,b]\*</sup>

- [a] Department of Chemistry, University of California, Berkeley  
Berkeley, CA 94720-1460, USA
- [b] Chemical Sciences Division, Lawrence Berkeley National Laboratory  
Berkeley, CA 94720, USA
- [c] LPCNO, Université de Toulouse, 135 Avenue de Rangueil, 31077 Toulouse (France)

|                                                                                                |    |
|------------------------------------------------------------------------------------------------|----|
| <b>Supporting Information</b> .....                                                            | 1  |
| <b>S1 General Details</b> .....                                                                | 3  |
| <b>S2 Experimental Procedures and Characterization</b> .....                                   | 7  |
| <u>Synthesis of KL</u> .....                                                                   | 7  |
| <u>Synthesis of CeL(Cp<sup>Me4</sup>)<sub>2</sub> (1-Ce)</u> .....                             | 8  |
| <u>Synthesis of CeLMes(Cp<sup>Me4</sup>)<sub>2</sub> (1-CeMes)</u> .....                       | 9  |
| <u>Synthesis of CeL<sup>t</sup>Bu(Cp<sup>Me4</sup>)<sub>2</sub> (1-Ce<sup>t</sup>Bu)</u> ..... | 10 |
| <u>Synthesis of [(Cp<sup>Me4</sup>)<sub>2</sub>CeCl]<sub>2</sub> (3-Ce)</u> .....              | 11 |
| <u>Synthesis of CeCp<sup>Me4</sup><sub>2</sub>(OAr) (4-Ce)</u> .....                           | 12 |
| <u>Synthesis of (Cp<sup>Me4</sup>)<sub>2</sub>Ce(OTf)(THF) (5-Ce)</u> .....                    | 13 |
| <u>Synthesis of LaL(Cp<sup>Me4</sup>)<sub>2</sub> (1-La)</u> .....                             | 16 |
| <u>Synthesis of NdL(Cp<sup>Me4</sup>)<sub>2</sub> (1-Nd)</u> .....                             | 20 |
| <u>Synthesis of SmL(Cp<sup>Me4</sup>)<sub>2</sub> (1-Sm)</u> .....                             | 20 |
| <u>Synthesis of [MgBnL]<sub>2</sub> (7-Mg)</u> .....                                           | 21 |
| <u>Synthesis of [MgL]<sub>2</sub> (8-Mg)</u> .....                                             | 23 |
| <b>S3 Absorption and Fluorescence Data</b> .....                                               | 25 |

|                                                                                                    |     |
|----------------------------------------------------------------------------------------------------|-----|
| <b>S4 Electrochemistry</b> .....                                                                   | 28  |
| S4.1 Cyclic Voltammograms .....                                                                    | 28  |
| S4.2 Rehm Weller Calculation for <b>1-Ce</b> .....                                                 | 32  |
| <b>S5 Stoichiometric C-F activation of PhCF<sub>3</sub></b> .....                                  | 33  |
| S5.1 Preliminary reactions .....                                                                   | 33  |
| S5.2 Optimized reactions .....                                                                     | 37  |
| S5.3 Substrate scope .....                                                                         | 41  |
| <b>S6 Catalytic alkyl coupling</b> .....                                                           | 44  |
| S6.1 20 mol% catalytic reactions with MgBn <sub>2</sub> (THF) <sub>2</sub> .....                   | 44  |
| S6.2 20 mol% reactions of <b>1-Ce</b> with other metal dialkyl reagents .....                      | 51  |
| S6.3. 1 mol% catalytic reactions with <b>1-Ce, 1-La, 1-Nd, 1-Sm</b> and <b>7-Mg</b> .....          | 53  |
| S6.4 1 mol% catalytic reactions with <b>1-Ce, 1-La</b> and <b>7-Mg</b> in THF-D <sub>8</sub> ..... | 62  |
| <b>S7 Stoichiometric alkene coupling</b> .....                                                     | 65  |
| S7.1. Preliminary reactions .....                                                                  | 65  |
| S7.2. Optimized reactions .....                                                                    | 68  |
| <b>S8 Miscellaneous and Control reactions</b> .....                                                | 71  |
| <b>S9 Crystallography</b> .....                                                                    | 87  |
| S9.1 Crystal Structures .....                                                                      | 87  |
| <b>S10 Computational Details</b> .....                                                             | 98  |
| S10.1 Atomic Orbital Compositions .....                                                            | 99  |
| S10.2 Excitation energies and orbitals .....                                                       | 102 |
| S10.3 Cartesian coordinates .....                                                                  | 117 |
| S10.4 Unpaired Spin Density Plots .....                                                            | 173 |
| <b>S11 References</b> .....                                                                        | 176 |

## **S1 General Details**

All moisture and air sensitive materials were manipulated using standard high-vacuum Schlenk-line techniques and MBraun gloveboxes and stored under an atmosphere of dried and deoxygenated dinitrogen. All glassware items, cannulae and Fisherbrand 1.2  $\mu\text{m}$  retention glass microfibre filters were dried in a 160  $^{\circ}\text{C}$  oven overnight before use.

Hexanes, tetrahydrofuran (THF), diethyl ether ( $\text{Et}_2\text{O}$ ) and toluene for use with moisture and air sensitive compounds were dried using an MBRAUN SPS 800 Manual solvent purification system and stored over activated 3  $\text{\AA}$  molecular sieves. Benzene- $\text{d}_6$ , pyridine- $\text{d}_5$  were purchased from Cambridge Isotope Laboratories and were refluxed over potassium metal for 24 hours, freeze-pump-thaw degassed and purified by trap-to-trap distillation prior to use. THF- $\text{D}_8$  was purchased from Cambridge Isotope Laboratories and dried over sodium/benzophenone before being freeze-pump-thaw degassed and purified by trap-to-trap distillation prior to use. All solvents were purchased from Sigma-Aldrich or Fisher Scientific and stored over 3  $\text{\AA}$  molecular sieves for 4 hours before being used.

$\text{PhICl}_2$  was prepared according to the literature procedure<sup>1</sup> and stored at  $-30$   $^{\circ}\text{C}$ . Dihydrocarbyl magnesium reagents<sup>2</sup>,  $[\text{H}_2\text{L}]\text{Br}$ , **HL**, **HLMes** and **HL'Bu**<sup>3</sup>,  $\text{KC}_5\text{Me}_4\text{H}$ ,<sup>4</sup> lanthanide triiodides ( $\text{Ln} = \text{La}, \text{Ce}, \text{Nd}, \text{Sm}$ ),<sup>5,6</sup> lanthanide tris(tetramethylcyclopentadienyl) complexes ( $\text{Ln} = \text{La}, \text{Ce}, \text{Nd}, \text{Sm}$ ),<sup>5,7,8</sup> and *ortho*-substituted benzotrifluoride 1- $\text{CF}_3$ -2- $(\text{C}_3\text{H}_5)\text{C}_6\text{H}_4$  (**9**),<sup>9</sup> were all prepared using published methods. All other chemicals were purchased from commercial suppliers and degassed and/or dried under vacuum or over 3  $\text{\AA}$  molecular sieves for 12 hours before use.

The station for photochemical reactions was equipped with a fan to maintain constant temperature, and unless otherwise stated, a single 40 W Kessil A160WE Tuna Blue lamp. The reactions were conducted in J-Young valved NMR tubes fixed at a distance of 7.5 cm from the light source.

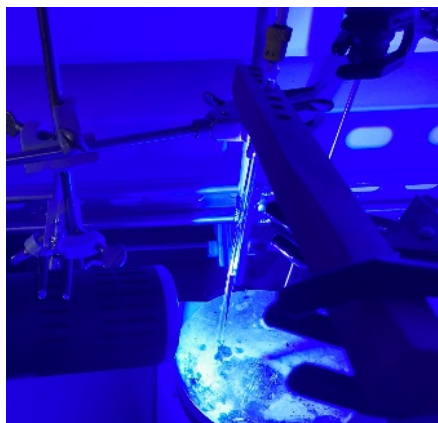

**Figure S1.** Reaction set-up for photochemical reactions.

NMR spectra were recorded on Bruker Avance 400, 500 and 600 MHz spectrometers and are referenced to residual protio solvent (3.58 and 1.72 ppm for THF- $D_6$ , 7.16 ppm for  $C_6D_6$ ) for  $^1H$  NMR spectroscopy. THF was used as solvents for No Deuterium (NoD) NMR experiments,<sup>10</sup> and was referenced to added tetramethylsilane (0.00 ppm for both  $^1H$  and  $^{13}C\{^1H\}$  NMR spectroscopic experiments). Quantitative  $^1H$  NMR data were acquired with a minimum of eight scans, with the delay time set to 5x the longest  $T_1$  value present. Chemical shifts are quoted in ppm and coupling constants in Hz. Tetrakis(trimethylsilyl)silane (TMS\*) was used as internal standards for quantitative  $^1H$  NMR spectroscopy. NMR spectra were taken at 25°C unless otherwise noted. Structural assignments were performed using HSQC and HMBC NMR spectroscopic experiments when necessary. Elemental analyses were carried out by the microanalytic services in the College of Chemistry at the University of California, Berkeley. Difficulty in acquiring elemental analyses of organolanthanides is well reported.<sup>11</sup> Multiple attempts to collect data have been made but poor carbon combustion has been a problem. GC-MS measurements were acquired using an Agilent 7890B GC-MS system; LC-MS data LCMS was collected with the ACQUITY™ UPLC™ H-Class PLUS System; HRMS data was collected using a PerkinElmer HRMS.

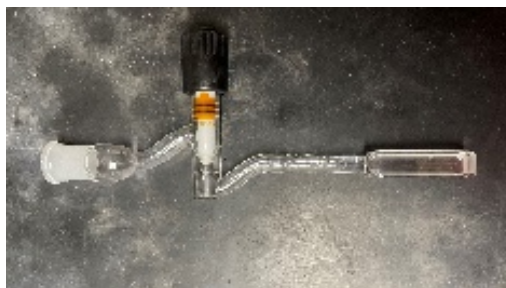

**Figure S2.** 10 mm pathlength quartz cell fused with a J-Young valve used for collecting photophysical data of all air sensitive compounds.

Quartz cells with a 10 mm pathlength equipped with a J-Young valve were used to contain samples prepared under a dinitrogen atmosphere for electronic absorption spectra (UV-Vis) and fluorescence measurements. UV-Vis measurements were collected on an Agilent Varian Cary 50 UV-Vis spectrophotometer. Emission and excitation spectra were collected on Fluorolog®-3 spectrofluorometer.

Single crystal X-ray diffraction data of **1-Ce** were collected using an Excalibur Eos diffractometer, fitted with a CCD area detector and using MoK $\alpha$  radiation ( $\lambda = 0.71073 \text{ \AA}$ ) at 170 K. X-ray diffraction data for **3-Ce** were collected at beamline 12.2.1 of the Advanced Light Source (ALS) at Lawrence Berkeley National Lab, using a Bruker D8 diffractometer coupled to a Bruker PhotonII CPAD detector with Si(111)-monochromated synchrotron radiation (17 keV radiation). Single crystal X-ray diffraction data of all other compounds were collected using a Rigaku Xtalab Synergy-S diffractometer fitted with a HyPix-6000HE photon counting detector using MoK $\alpha$  ( $\lambda = 0.71073 \text{ \AA}$ ) or CuK $\alpha$  ( $\lambda = 0.15418 \text{ \AA}$ ) radiation. All structures were solved using SHELXT in Olex2 and refined using SHELXL in Olex2.<sup>13,14</sup> Absorption corrections were completed using CrysAlis PRO (Rigaku Oxford Diffraction) software. Analytical numeric absorption corrections used a multifaceted crystal model based on expressions derived by Clark and Reid.<sup>15</sup> Numerical absorption correction was based on a Gaussian integration over a multifaceted crystal model.

Cyclic voltammetry (CV) was performed inside a glovebox under nitrogen atmosphere, using an EC Epsilon (BASi) potentiostat. The working electrodes were glassy carbon with an area of  $0.071 \text{ cm}^2$  that were polished with Al<sub>2</sub>O<sub>3</sub> (1  $\mu\text{m}$ , 0.3  $\mu\text{m}$ , 0.05  $\mu\text{m}$ ) and rinsed with ultrapure water and acetone before the

measurements. The counter electrode was a platinum wire. The reference electrode ( $\text{Ag}/\text{Ag}^+$ ) consisted of a silver wire in a reservoir of the electrolyte solution to which a small amount of  $\text{AgBF}_4$  was added, connected to the sample solution by a frit. Potentials were calibrated to the  $\text{Fc}/\text{Fc}^+$  redox couple in each electrolyte solution. Experiments were performed in  $\text{TBAPF}_6$  in THF (0.1 M) or in  $\text{TBABPh}_4$  in THF (0.085 M, close to saturation) at room temperature. Analyte concentrations were kept at around 5 mM for the measurements.

## S2 Experimental Procedures and Characterization

### Synthesis of KL

To a cold (-78 °C), magnetically stirred, cream slurry of 2.13 g of [H<sub>2</sub>L1]Br in THF (50 mL) was added a cold suspension of 2.16 g of KN'' in THF (100 mL) dropwise over ten minutes. The mixture was allowed to warm to room temperature, with stirring, overnight. After this period, the orange solution was isolated from the pale grey powder (KBr) by filtration. Concentration of the solution to 5 ml and the subsequent addition of 10 ml of pentane provided a cream powder. This powder was isolated by filtration and washed with pentane (3 x 20 ml) to afford [KL1]. Yield: 1.56 g (82%)

<sup>1</sup>H NMR (500 MHz, pyridine-*d*<sub>5</sub>, 300 K): δ 7.49 (d, *J*<sub>H-H</sub> = 2.9, 1H, CH(5)<sub>Ph</sub>), 7.34 (d, *J*<sub>H-H</sub> = 2.9, 1H, CH(3)<sub>Ph</sub>), 7.33 (d, *J*<sub>H-H</sub> = 1.6, 1H, CH<sub>Im(Ph)</sub>), 7.10 (d, *J*<sub>H-H</sub> = 1.6, 1H, CH<sub>Im(*i*Pr)</sub>), 4.51 (sept, *J*<sub>H-H</sub> = 6.7, 1H, CH<sub>*i*Pr</sub>), 1.69 (s, 9H, CH<sub>3(*t*Bu)</sub>), 1.38 (s, 9H, CH<sub>3(*t*Bu)</sub>), 1.30 (d, *J*<sub>H-H</sub> = 6.7, 6H, CH<sub>3(*i*Pr)</sub>). <sup>13</sup>C{<sup>1</sup>H} NMR (125.8 MHz, pyridine-*d*<sub>5</sub>, 300 K): δ 206.3 (s, C-K), 163.4 (s, C-O), 138.6 (s, C<sub>Ph</sub>), 131.4 (s, C<sub>Ph</sub>), 127.6 (s, C<sub>Ph</sub>), 122.7 (s, CH<sub>Im(Ph)</sub>), 122.1 (s, CH<sub>Ph</sub>), 122.0 (s, CH<sub>Ph</sub>), 114.6 (s, CH<sub>Im(*i*Pr)</sub>), 51.8 (s, CH<sub>*i*Pr</sub>), 35.7 (s, C<sub>*t*Bu</sub>), 33.7 (s, C<sub>*t*Bu</sub>), 32.2 (s, CH<sub>3(*t*Bu)</sub>), 30.0 (s, CH<sub>3(*t*Bu)</sub>), 24.0 (s, CH<sub>3(*i*Pr)</sub>).

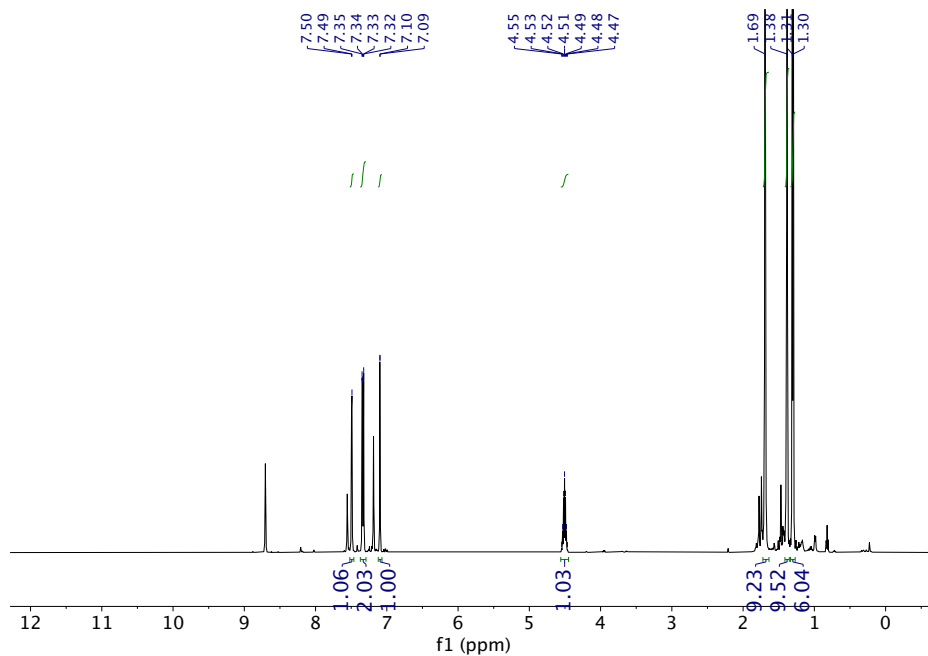

**Figure S3.** <sup>1</sup>H NMR in pyridine-*D*<sub>5</sub> of KL.

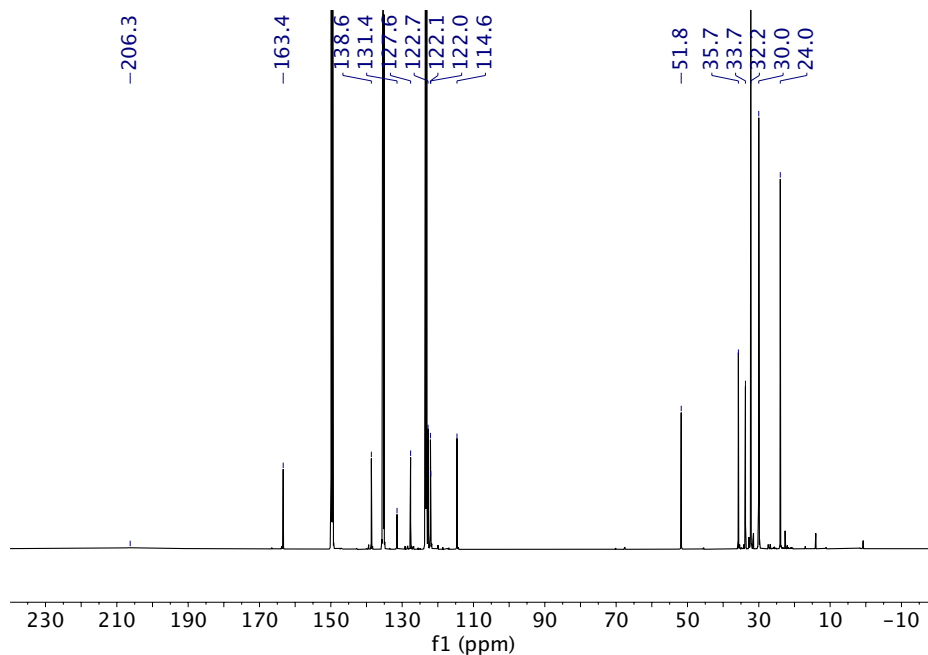

**Figure S4.**  $^{13}\text{C}\{^1\text{H}\}$  NMR in pyridine- $\text{D}_5$  of **KL**.

#### Synthesis of **CeL(Cp<sup>Me4</sup>)<sub>2</sub> (1-Ce)**

In a glovebox, to a magnetically stirred green solution of **Ce(Cp<sup>Me4</sup>)<sub>3</sub> (2-Ce)** (1.212 g, 2.40 mmol, 1 equiv.) in toluene (50 mL), **HL** (0.756 g, 2.40 mmol, 1 equiv.) was added and the solution stirred overnight. After this time, volatiles were removed by vacuum evaporation and the orange solid washed with cold ( $-30^\circ\text{C}$ ) hexane (2 x 5 ml) to afford **CeL(Cp<sup>Me4</sup>)<sub>2</sub>**. Yield: 1.37 g (82%). Diffraction quality crystals were grown from a concentrated hexane solution at  $-30^\circ\text{C}$ .

$^1\text{H}$  NMR (500 MHz,  $\text{C}_6\text{D}_6$ , 298 K):  $\delta$  16.66 (s, 2H,  $\text{CH}_{\text{Cp}}$ ), 12.59 (s, 1H,  $\text{CH}_{\text{Im}}$ ), 11.03 (s, 1H,  $\text{CH}_{\text{Ph}}$ ), 8.39 (s, 1H,  $\text{CH}_{\text{Ph}}$ ), 7.29 (s, 6H,  $\text{CH}_{3\text{Cp}}$ ), 4.53 (s, 1H,  $\text{CH}_{\text{Im}}$ ), 2.05 (s, 9H,  $\text{CH}_{3\text{tBu}}$ ), 1.57 (s, 6H,  $\text{CH}_{3\text{Cp}}$ ), 0.59 (s, 6H,  $\text{CH}_{3\text{Cp}}$ ), -3.84 (s, 6H,  $\text{CH}_{3\text{Cp}}$ ), -4.27 (s, 9H,  $\text{CH}_{3\text{tBu}}$ ), -8.23 (d,  $J_{\text{H-H}} = 6.7$ , 6H,  $\text{CH}_{3\text{iPr}}$ ), -41.41 (s, 1H,  $\text{CH}_{\text{iPr}}$ ).

Anal. Calcd for  $\text{C}_{38}\text{H}_{55}\text{CeN}_2\text{O}$ : C, 65.58, H, 7.97, N, 4.03. Found: C, 64.11; H, 7.82; N, 4.03.



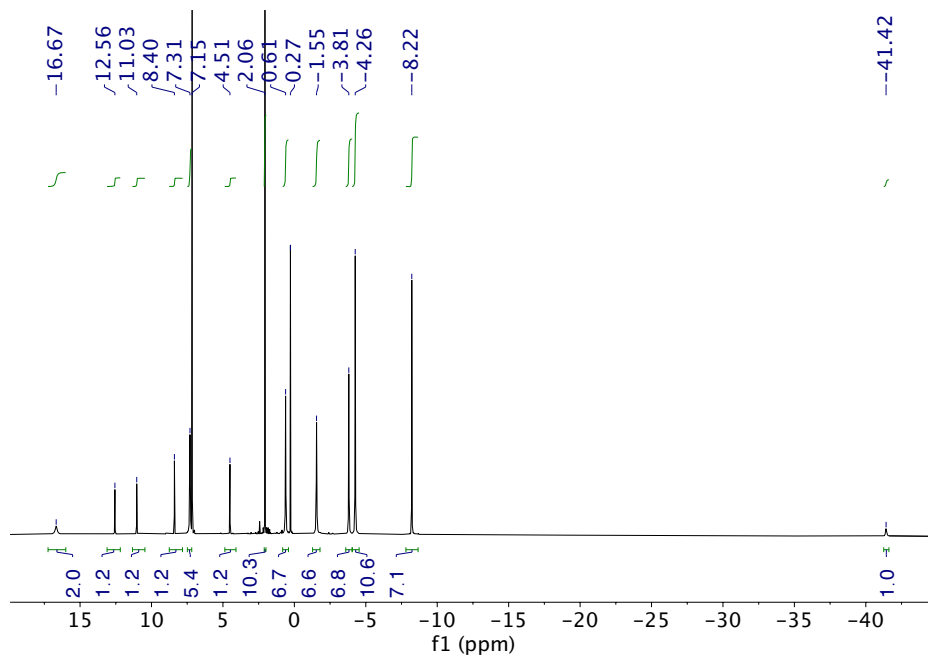

**Figure S5.**  $^1\text{H}$  NMR in  $\text{C}_6\text{D}_6$  of **1-Ce**.

### Synthesis of $\text{CeLMes}(\text{Cp}^{\text{Me}_4})_2$ (**1-CeMes**)

In a glovebox, to a magnetically stirred green solution of  $\text{Ce}(\text{Cp}^{\text{Me}_4})_3$  (**2-Ce**) (38.4 mg, 0.0760 mmol, 1 equiv.) in toluene (50 mL), **HLMes** (30.0 mg, 0.0760 mmol, 1 equiv.) was added and the solution stirred overnight. After this time, volatiles were removed by vacuum evaporation and the orange solid washed with cold ( $-30^\circ\text{C}$ ) hexane (2 x 2 ml) to afford  $\text{CeLMes}(\text{Cp}^{\text{Me}_4})_2$ . Yield: 45.2 mg (77%).

$^1\text{H}$  NMR (400 MHz,  $\text{C}_6\text{D}_6$ , 298 K):  $\delta$  17.69 (br s, 2H,  $\text{CH}_{\text{Cp}}$ ), 13.33 (s, 1H,  $\text{CH}_{\text{Im}}$ ), 11.49 (s, 1H,  $\text{CH}_{\text{Ph}}$ ), 8.46 (s, 1H,  $\text{CH}_{\text{Ph}}$ ), 8.34 (s, 6H,  $\text{CH}_3_{\text{Cp}}$ ), 5.50 (s, 1H,  $\text{CH}_{\text{Im}}$ ), 3.62 (s, 6H,  $\text{CH}_3_{\text{Mes}}$ ), 2.07 (s, 9H,  $\text{CH}_3_{\text{tBu}}$ ), 0.36 (s, 2H,  $\text{CH}_{\text{Mes}}$ ), -1.54 (s, 3H,  $\text{CH}_3_{\text{Mes}}$ ), -3.14 (s, 6H,  $\text{CH}_3_{\text{Cp}}$ ), -3.36 (s, 6H,  $\text{CH}_3_{\text{Cp}}$ ), -4.31 (s, 9H,  $\text{CH}_3_{\text{tBu}}$ ), -7.53 (br s, 6H,  $\text{CH}_3_{\text{Cp}}$ ). Anal. Calcd for  $\text{C}_{44}\text{H}_{61}\text{CeN}_2\text{O}$ : C, 68.27, H, 7.94, N, 3.62. Found: C, 63.83; H, 7.85; N, 3.92.

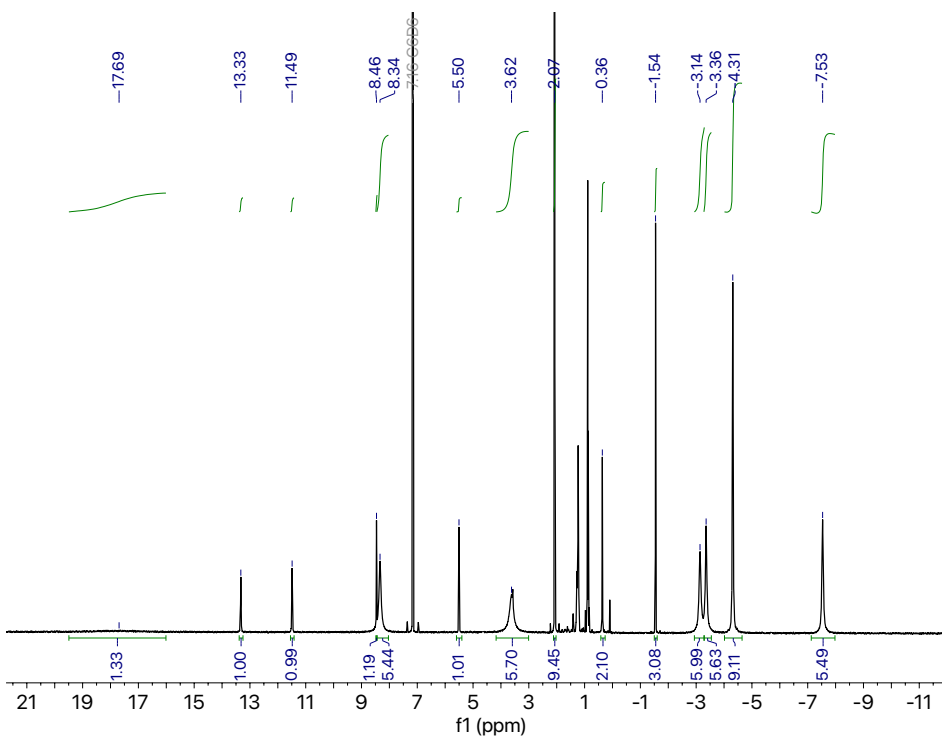

**Figure S6.**  $^1\text{H}$  NMR in  $\text{C}_6\text{D}_6$  of **1-CeMes**.

#### Synthesis of $\text{CeL}^t\text{Bu}(\text{Cp}^{\text{Me}_4})_2$ (**1-Ce<sup>t</sup>Bu**)

In a glovebox, to a magnetically stirred green solution of  $\text{Ce}(\text{Cp}^{\text{Me}_4})_3$  (**2-Ce**) (125 mg, 0.254 mmol, 1 equiv.) in toluene (50 mL), **HL<sup>t</sup>Bu** (83.9 mg, 0.254 mmol, 1 equiv.) was added and the solution stirred overnight. After this time, volatiles were removed by vacuum evaporation and the orange solid washed with cold ( $-30^\circ\text{C}$ ) hexane (2 x 2 ml) to afford  $\text{CeL}^t\text{Bu}(\text{Cp}^{\text{Me}_4})_2$ . Yield: 83.9 mg (78%).

$^1\text{H}$  NMR (400 MHz,  $\text{C}_6\text{D}_6$ )  $\delta$  17.58 (br s, 2H,  $\text{CH}_{\text{Cp}}$ ), 13.06 (s, 1H,  $\text{CH}_{\text{Im}}$ ), 11.31 (s, 1H,  $\text{CH}_{\text{Ph}}$ ), 8.49 (s, 1H,  $\text{CH}_{\text{Ph}}$ ), 7.97 (s, 6H,  $\text{CH}_{3\text{Cp}}$ ), 4.51 (s, 1H,  $\text{CH}_{\text{Im}}$ ), 2.15 (s, 9H,  $\text{CH}_{3\text{tBu}(\text{Ph})}$ ), 0.46 (s, 9H,  $\text{CH}_{3\text{tBu}}$ ), -1.65 (s, 6H,  $\text{CH}_{3\text{Cp}}$ ), -4.28 (s, 6H,  $\text{CH}_{3\text{Cp}}$ ), -4.51 (s, 9H,  $\text{CH}_{3\text{tBu}(\text{Ph})}$ ), -8.67 (s, 6H,  $\text{CH}_{3\text{Cp}}$ ).

Anal. Calcd for  $\text{C}_{39}\text{H}_{58}\text{CeN}_2\text{O}$ : C, 65.88, H, 8.22, N, 3.94. Found: C, 65.75; H, 8.43; N, 4.14.

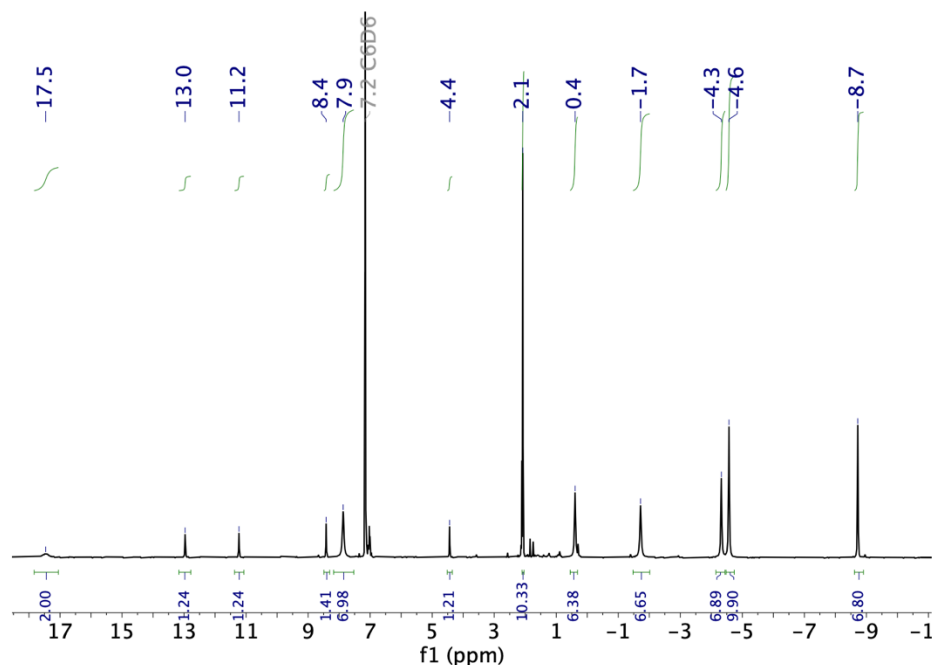

**Figure S7.**  $^1\text{H}$  NMR in  $\text{C}_6\text{D}_6$  of  $1\text{-Ce}^+\text{Bu}$ .

### Synthesis of $[(\text{Cp}^{\text{Me}_4})_2\text{CeCl}]_2$ (3-Ce)

**Method A:** In a glovebox a vial was charged with  $(\text{Cp}^{\text{Me}_4})_3\text{Ce}$  (47.0 mg, 0.0933 mmol, 1.00 equiv.) in THF (5 mL), resulting in a green solution. With stirring, a colorless solution of  $\text{PhICl}_2$  (13.5 mg, 0.0484 mmol, 0.52 equiv.) in THF (1 mL) was added dropwise. Upon addition, the color of the solution quickly changed from green to orange-yellow. After stirring for 2 hours at room temperature, the volatiles were removed under vacuum, resulting in a pink-orange powder which was subsequently washed with hexanes (2 x 0.5 mL). The powder was redissolved in a minimum of THF (1 mL), and the bright orange-yellow solution was filtered through glass fiber into a 1 mL vial, layered with hexanes (3 mL) and stored at  $-30\text{ }^\circ\text{C}$  for 3 days to yield large orange blocks of  $[(\text{Cp}^{\text{Me}_4})_2\text{CeCl}]_2$  that were dried *in vacuo*. Yield: 54%. Crystals grown via this method were suitable for X-ray diffraction studies.

**Method B:** A Teflon-stoppered ampoule was charged with  $\text{CeCl}_3$  (11.5 mg, 0.0467 mmol, 1.00 equiv.)  $(\text{Cp}^{\text{Me}_4})_3\text{Ce}$  (47.0 mg, 0.0933 mmol, 2.00 equiv.) and THF (5 mL), resulting in a green slurry. The ampoule was sealed and heated to  $70\text{ }^\circ\text{C}$  for 24 hours, resulting in a color change from green to yellow. The volatiles were removed under vacuum, resulting in a pink-orange powder, which was subsequently washed with

hexanes (2 x 0.5 mL). The powder was redissolved in a minimum of THF (1 mL), and the bright orange-yellow solution was filtered through glass fiber into a 1 mL vial, layered with hexanes (3 mL) and stored at  $-30\text{ }^{\circ}\text{C}$  for 3 days to yield large orange blocks of  $[(\text{Cp}^{\text{Me}4})_2\text{CeCl}]_2$  that were dried under vacuum. Yield: 54%

**Note:**  $[(\text{Cp}^{\text{Me}4})_2\text{CeCl}]_2$  is dichroic, appearing as a pink solid when isolated as a powder and orange-yellow in THF solution.

$^1\text{H}$  NMR (500 MHz, THF- $\text{D}_8$ )  $\delta$  8.79 (br. s, 6H,  $\text{CH}_{3\text{Cp}}$ ), 6.83 (br. s, 1H,  $\text{H}_{\text{Cp}}$ ),  $-0.93$  (br. s, 6H,  $\text{CH}_{3\text{Cp}}$ ).

Anal. Calcd for:  $\text{C}_{36}\text{H}_{52}\text{Ce}_2\text{Cl}_2$ : C, 51.72; H, 6.27. Found: C, 51.28; H, 6.09.

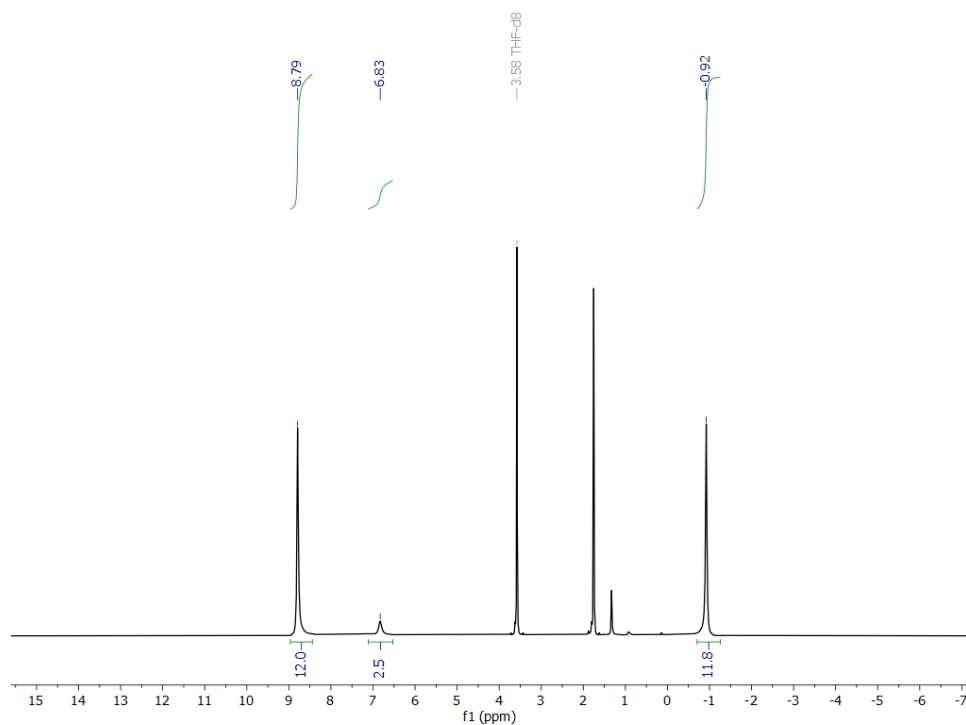

**Figure S8.**  $^1\text{H}$  NMR in THF- $\text{D}_8$  of **3-Ce**.

#### Synthesis of $\text{CeCp}^{\text{Me}4}_2(\text{OAr})$ (**4-Ce**) ( $\text{OAr} = 1\text{-O-}2,6\text{-}^t\text{Bu}_2\text{-}4\text{-Me-C}_6\text{H}_2$ )

In a glovebox, a vial was charged with **3-Ce** (31.5 mg, 0.0377 mmol, 1 equiv.), sodium 2,6-di-*tert*-butyl-4-methylphenolate (18.3 mg, 0.0754 mmol, 2 equiv.) and hexanes (5 mL). The reaction was stirred at room temperature for 48 hours and following a gradual color change from yellow to deep red, volatiles were removed under vacuum. The red residue was extracted into hexane before being dried to give a red powder

identified as  $(\text{Cp}^{\text{Me4}})_2\text{Ce}(\text{OAr})$  by  $^1\text{H}$  NMR spectroscopy. Yield: 88% Diffraction quality crystals were grown from a concentrated hexane solution at  $-30^\circ\text{C}$ .

$^1\text{H}$  NMR (400 MHz,  $\text{C}_6\text{D}_6$ ):  $\delta$  28.01 (br. s, 2H,  $\text{H}_{\text{Cp}}$ ), 6.57 (s, 2H,  $\text{H}_{\text{m-Ph}}$ ), 3.18 (br. s, 12H,  $\text{CH}_{3\text{Cp}}$ ), 2.18 (s, 3H,  $3\text{H}_{\text{p-Ph}}$ ), -4.18 (br. s, 12H,  $\text{CH}_{3\text{Cp}}$ ), -6.26 (br. s, 18H,  $\text{CH}_{3\text{tBu}}$ ).

Anal. Calcd for:  $\text{C}_{33}\text{H}_{49}\text{CeO}$ : C, 65.86; H, 8.21. Found: C, 66.00; H, 8.03.

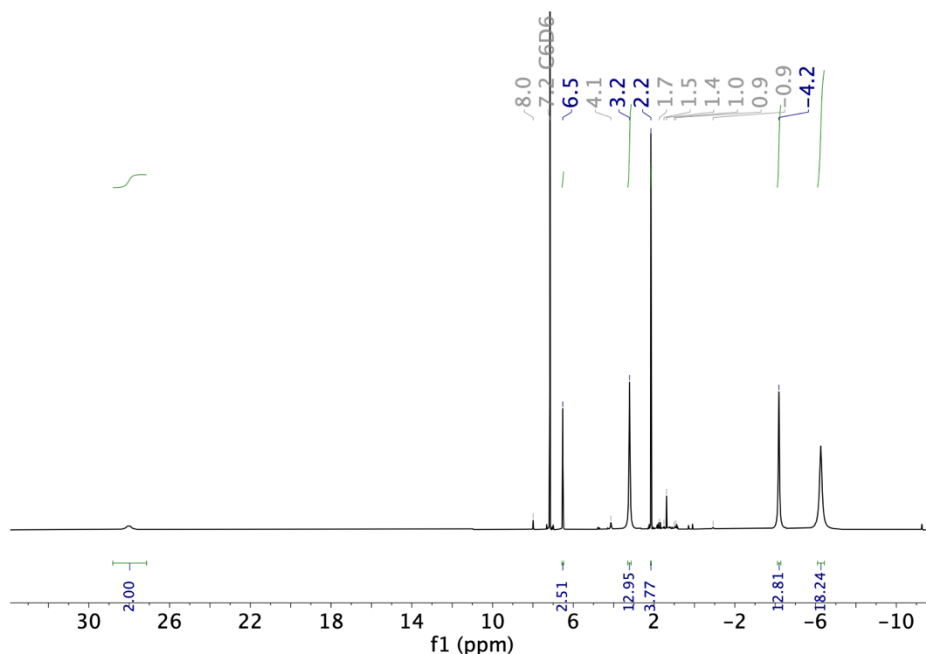

**Figure S9.**  $^1\text{H}$  NMR in  $\text{C}_6\text{D}_6$  of **4-Ce**.

#### Synthesis of $(\text{Cp}^{\text{Me4}})_2\text{Ce}(\text{OTf})(\text{THF})$ (**5-Ce**)

In a glovebox, a teflon-stoppered ampoule was charged with **2-Ce** (1.0442 g, 2.073 mmol, 2.01 equiv.),  $\text{Ce}(\text{OTf})_3$  (0.6065 g, 1.033 mmol, 1.00 equiv.) and THF (30 mL), resulting in a dark green slurry. The ampoule was sealed and placed in a  $70^\circ\text{C}$  oil bath with stirring for 20 hours, during which time the color changed from dark green to a bright yellow. The reaction mixture was then cooled to room temperature before being filtered through glass fiber. The yellow filtrate was dried under vacuum to yield a pale-yellow powder which was washed with hexanes (2 x 4 mL) before drying under vacuum again, yielding **5-Ce**. 89%

yield. X-ray quality crystals of **5-Ce** were grown by layering a concentrated THF solution with hexanes and storing at  $-30\text{ }^{\circ}\text{C}$  for 3 days.

**Note:** **5-Ce** is thermochromic, appearing pale yellow when cold ( $-30\text{ }^{\circ}\text{C}$ ) and bright yellow at room temperature in either solution or solid state.

$^1\text{H}$  NMR (500 MHz, THF- $\text{D}_8$ )  $\delta$  11.68 (br. s, 12H), 10.78 (br. s, 2H),  $-4.50$  (br. s, 12H).  $^{19}\text{F}$  NMR (471 MHz, THF- $\text{D}_8$ )  $\delta$   $-96.2$  (s). Anal. Calcd for:  $\text{C}_{23}\text{H}_{34}\text{CeF}_3\text{O}_4\text{S}$ : C, 43.76; H, 5.68. Found: C, 42.63; H, 5.33.

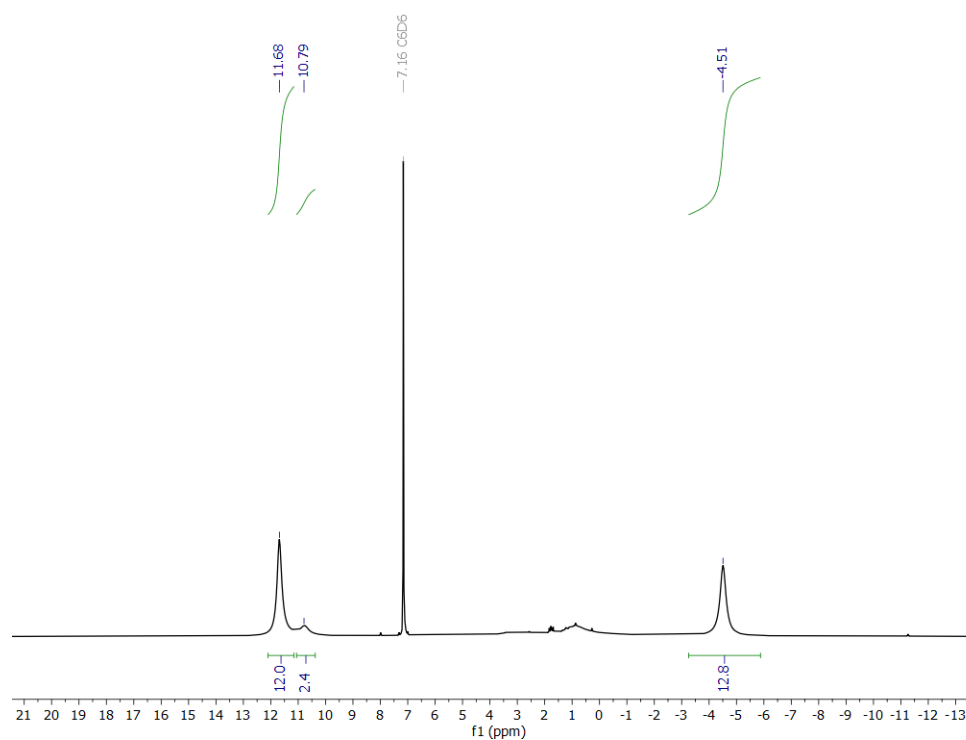

**Figure S10.**  $^1\text{H}$  NMR in  $\text{C}_6\text{D}_6$  of **5-Ce**.

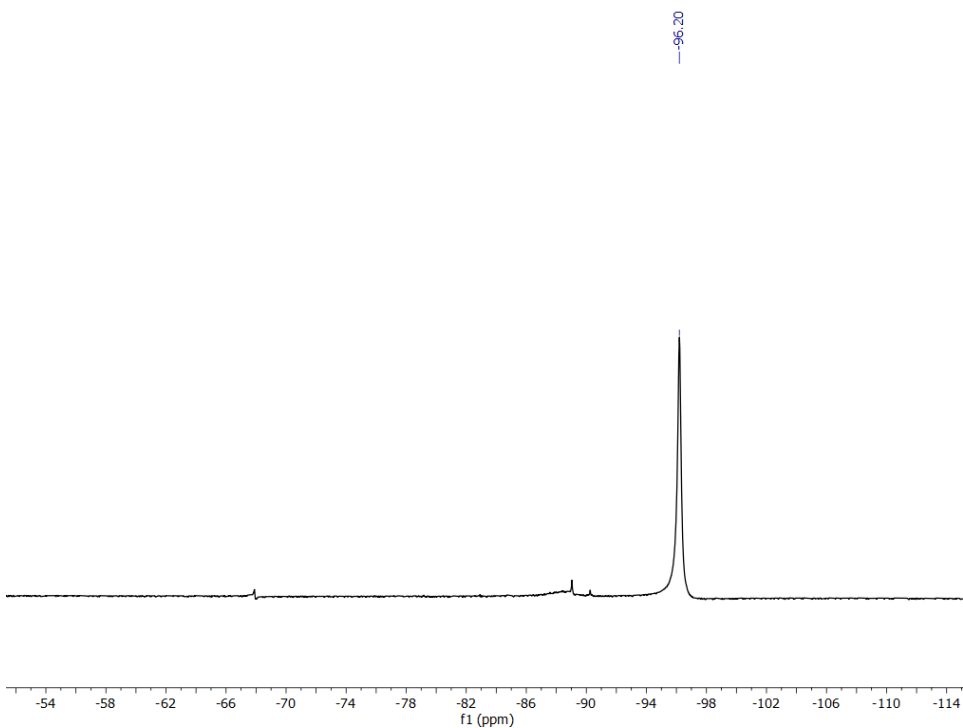

**Figure S11.**  $^{19}\text{F}$  NMR in  $\text{THF-D}_8$  of **5-Ce**.

#### Synthesis of $(\text{Cp}^{\text{Me}_4})_2\text{Ce}(\text{CH}_2\text{Ph})(\text{THF})$ (**6-Ce**)

In a glovebox, a 20 mL vial was charged with **(5-Ce)** (262.4 mg, 0.4354 mmol, 1.00 equiv.) dissolved in THF (8 mL), yielding a bright yellow solution. With stirring, a THF solution (2 mL) of  $\text{MgBn}_2(\text{THF})_2$  (80.6 mg, 0.2298 mmol, 0.53 equiv.) was added dropwise, resulting in a darkening of the color to a golden yellow. The solution was stirred at room temperature for 1 hour before being dried under vacuum to yield a bright yellow residue, which was extracted with hexanes (20 mL). The yellow solution was filtered and concentrated, then stored at  $-30\text{ }^\circ\text{C}$  overnight to yield a bright yellow microcrystalline solid. After decanting the supernatant, the solid was dried under vacuum to yield  $(\text{Cp}^{\text{Me}_4})_2\text{Ce}(\text{CH}_2\text{Ph})(\text{THF})$ . 88% yield. X-ray quality crystals were grown by cooling a hexanes solution to  $-30\text{ }^\circ\text{C}$  for 3 days.

**Note:** In our hands,  $(\text{Cp}^{\text{Me}_4})_2\text{Ce}(\text{CH}_2\text{Ph})(\text{THF})$  decomposes to a dark brown material upon prolonged exposure to vacuum (i.e. >3 hours), presumably due to irreversible loss of coordinated THF. Moreover, the complex is dichroic in solution, appearing yellow when concentrated but green when dilute in hexane solution.

$^1\text{H}$  NMR (500 MHz,  $\text{C}_6\text{D}_6$ )  $\delta$  15.62 (br. s, 2H), 5.14 (br. s, 12H), 3.04 (br. s, 12H), 0.14 (br. s, 2H), -1.20 (br. s, 4H), -2.65 (t,  $J = 6.8$  Hz, 1H,  $\text{H}_{\text{p-Ar}}$ ), -4.33 (br. s, 4H), -4.67 (br. s, 2H), -11.27 (br. s, 2H).

Anal. Calcd for:  $\text{C}_{29}\text{H}_{42}\text{CeO}$ : C, 63.7; H, 7.74. Found: C, 58.02; H, 6.79. [Multiple attempts]

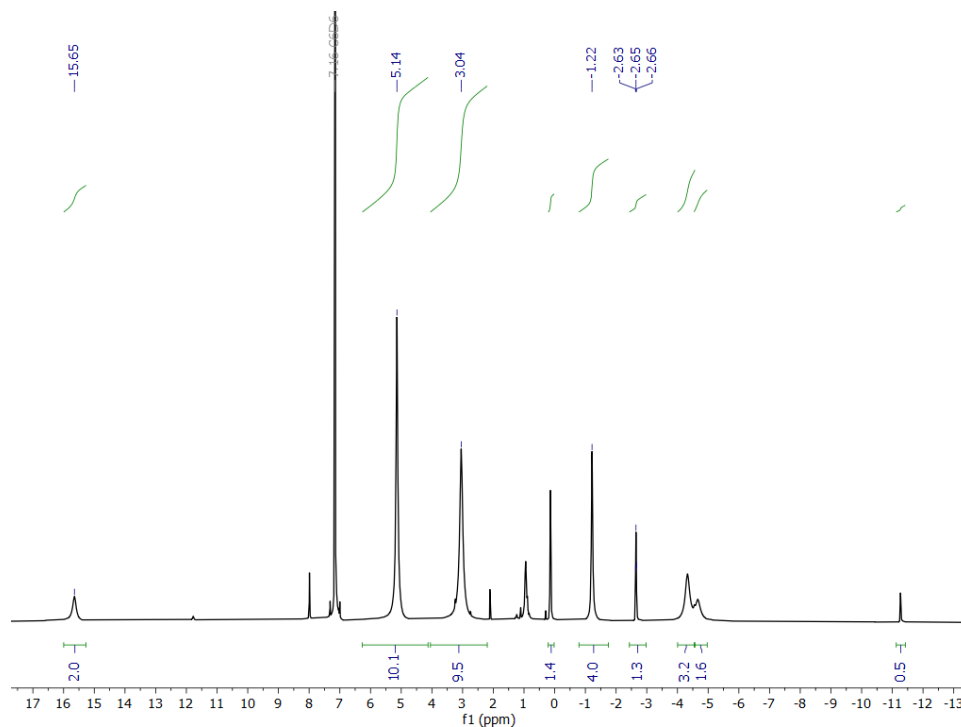

**Figure S12.**  $^1\text{H}$  NMR in  $\text{C}_6\text{D}_6$  of **6-Ce**.

### Synthesis of $\text{LaL}(\text{Cp}^{\text{Me}_4})_2$ (**1-La**)

In a glovebox, to a magnetically stirred solution of  $\text{La}(\text{Cp}^{\text{Me}_4})_3$  (**2-La**) (1.212 g, 2.40 mmol, 1 equiv.) in toluene (50 mL), **HL** (0.756 g, 2.40 mmol, 1 equiv.) was added and the solution stirred overnight. After this time, volatiles were removed by vacuum evaporation and the cream solid washed with cold ( $-30^\circ\text{C}$ ) hexane (2 x 5 ml) to afford  $\text{LaL}(\text{Cp}^{\text{Me}_4})_2$ . Yield: 74%. Diffraction quality crystals were grown from a concentrated toluene solution at  $-30^\circ\text{C}$ .

$^1\text{H}$  NMR (500 MHz,  $\text{C}_6\text{D}_6$ , 298 K) :  $\delta$  7.50 (1H, d,  $J_{\text{H-H}} = 2.4$ ,  $\text{CH}_{\text{Im}}$ ), 7.10 (1H, d,  $J_{\text{H-H}} = 2.5$ ,  $\text{CH}_{\text{Im}}$ ), 6.73 (1H, d,  $J_{\text{H-H}} = 1.7$ ,  $\text{CH}_{\text{Ph}}$ ), 6.26 (1H, d,  $J_{\text{H-H}} = 1.8$ ,  $\text{CH}_{\text{Ph}}$ ), 5.77 (2H, s,  $\text{CH}_{\text{Cp}}$ ), 4.41 (1H, sept,  $J_{\text{H-H}} = 6.8$ ,  $\text{H}_{\text{iPr}}$ ), 2.23



(6H, s, CH<sub>3Cp</sub>), 2.21 (6H, s, CH<sub>3Cp</sub>), 2.11 (6H, s, CH<sub>3Cp</sub>), 1.97 (6H, s, CH<sub>3Cp</sub>), 1.87 (9H, s, CH<sub>3tBu</sub>), 1.69 (9H, s, CH<sub>3tBu</sub>), 1.39 (9H, s, CH<sub>3tBu</sub>), 1.17 (6H, d, J<sub>H-H</sub> = 6.8, CH<sub>iPr</sub>). <sup>13</sup>C{<sup>1</sup>H} NMR (125 MHz, C<sub>6</sub>D<sub>6</sub>, 298 K): δ 154.1 (s, C-O), 138.9 (s, C<sub>Ph</sub>), 136.5 (s, C<sub>Ph</sub>), 128.4 (s, NCN), 123.4 (s, C<sub>PhH</sub>), 122.5 (s, C<sub>im</sub>), 121.8 (s, Cp), 120.7 (s, Cp), 119.8 (s, Cp), 118.8 (s, Cp), 118.5 (s, C<sub>im</sub>), 114.7 (s, C<sub>PhH</sub>), 111.9 (s, CpH), 52.9 (s, iPrCH), 36.2 (s, C<sub>CH3</sub>), 34.3 (s, C<sub>CH3</sub>), 32.1 (s, C<sub>tBu</sub>), 30.6 (s, C<sub>tBu</sub>), 24.0 (s, iPrCH<sub>3</sub>), 13.0 (s, CpMe), 12.9 (s, CpMe), 11.4 (s, CpMe), 10.07 (s, CpMe).

Anal. Calcd for: C<sub>38</sub>H<sub>55</sub>LaN<sub>2</sub>O: C, 65.79, H, 7.85, N, 4.04. Found: C, 66.07; H, 8.03; N, 3.67.

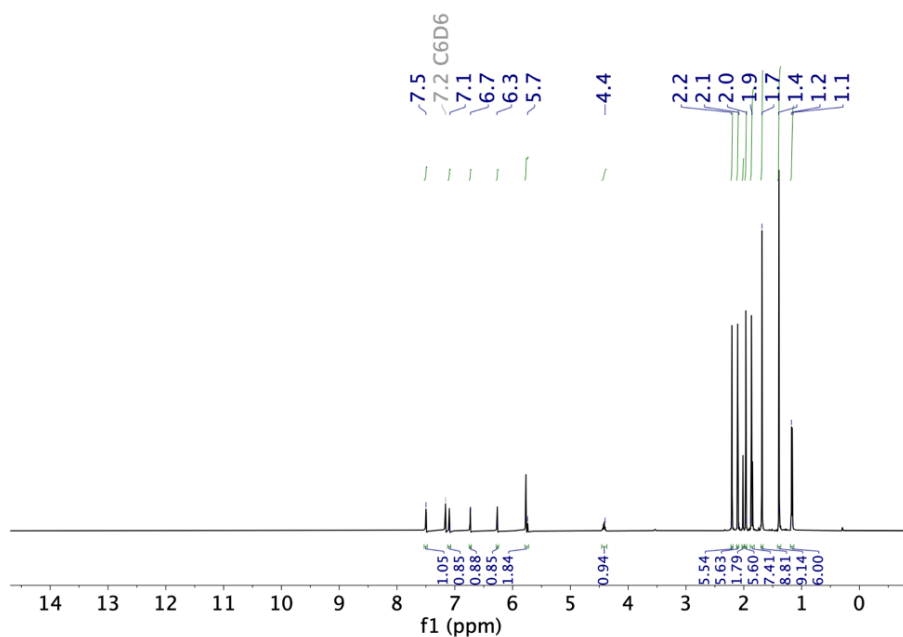

**Figure S13.** <sup>1</sup>H NMR in C<sub>6</sub>D<sub>6</sub> of **1-La**.

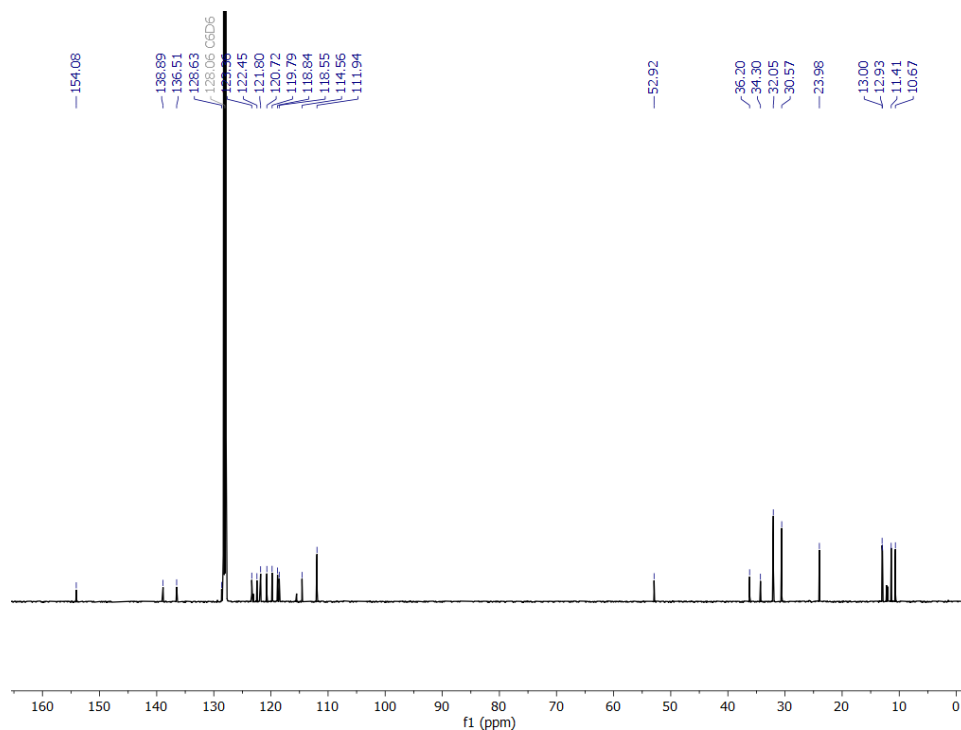

**Figure S14.**  $^{13}\text{C}\{^1\text{H}\}$  NMR in  $\text{C}_6\text{D}_6$  of **1-La**.

### Synthesis of $[(\text{Cp}^{\text{Me}4})_2\text{LaCl}]_2$ (**3-La**)

**Method A:** In a glovebox, to a magnetically stirred solution of  $\text{La}(\text{Cp}^{\text{Me}4})_3$  (**2-La**) (40.0 mg, 0.0575 mmol, 1 equiv.) in toluene (2 mL), benzyl chloride (6.66  $\mu\text{L}$ , 0.0579 mmol, 1 equiv.) was added and the solution stirred overnight. After this time, volatiles were removed by vacuum evaporation and the white solid washed with cold ( $-20^\circ\text{C}$ ) hexane (2 x 5 ml) to afford  $[(\text{Cp}^{\text{Me}4})_2\text{La}(\mu\text{-Cl})]_2$  Yield: 79%. Diffraction quality crystals were grown from a concentrated toluene solution at  $-30^\circ\text{C}$ .

**Method B:** In a glovebox a vial was charged with **2-La** (40.0 mg, 0.0575 mmol, 1.00 equiv.) in THF (5 mL). With stirring, a colorless solution of  $\text{PhICl}_2$  (7.92 mg, 0.0288 mmol, 0.52 equiv.) in THF (1 mL) was added dropwise. After stirring for 2 hours at room temperature, the volatiles were removed under vacuum, resulting in a cream powder which was subsequently washed with hexanes (2 x 0.5 mL). The powder was redissolved in a minimum of THF (1 mL), and the colorless solution was filtered through glass fiber into a 4 mL vial, layered with hexanes (3 mL) and stored at  $-30^\circ\text{C}$  for 3 days to yield large colorless blocks of  $[(\text{Cp}^{\text{Me}4})_2\text{LaCl}]_2$  that were dried *in vacuo*. Yield: 63%.

$^1\text{H}$  NMR (400 MHz, THF- $\text{H}_8$ , 298 K):  $\delta$  5.51 (2H, s,  $\text{CH}_{3\text{Cp}}$ ), 1.99 (6H, s,  $\text{CH}_{3\text{Cp}}$ ), 1.90 (6H, s,  $\text{C}_5\text{Me}_4\text{H}$ ).

$^{13}\text{C}\{^1\text{H}\}$  NMR (125 MHz, THF- $\text{H}_8$ , 298 K):  $\delta$  122.0 (s,  $\text{C}_{\text{Cp}}$ ), 122.0 (s,  $\text{C}_{\text{Cp}}$ ), 112.9 (s,  $\text{C}_{\text{HCp}}$ ), 12.5 (s,  $\text{C}_{\text{H}_3\text{Cp}}$ )

Anal. Calcd for  $\text{C}_{36}\text{Cl}_2\text{H}_{52}\text{La}_2$ : C, 51.88; H, 6.29; Found: C, 49.03; H, 5.69. [Multiple attempts]

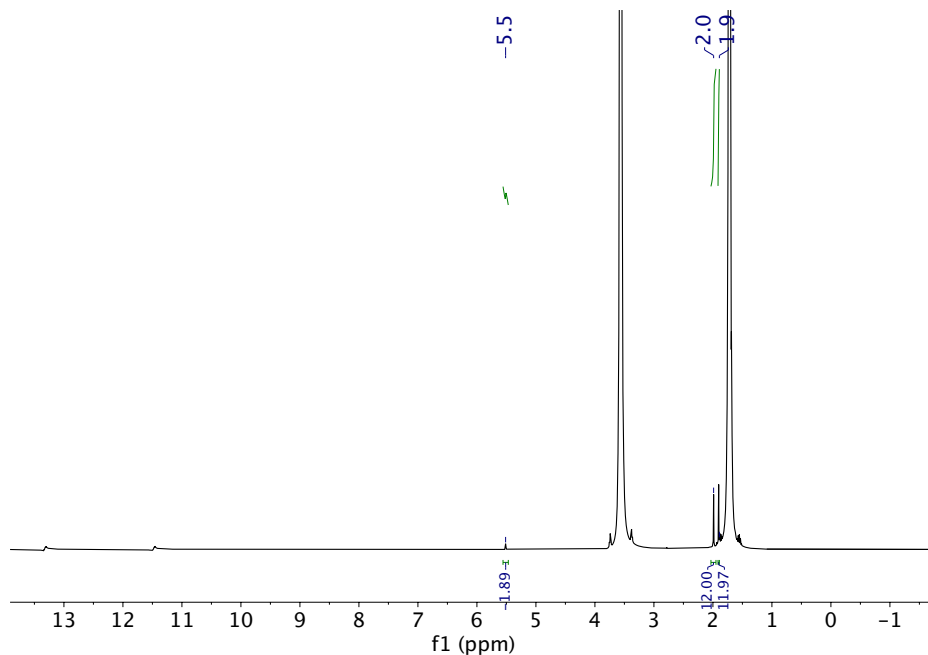

**Figure S15.**  $^1\text{H}$  NoD NMR in THF- $\text{H}_8$  of **3-La**. Solvent artifacts are observed between 11.5 and 13.5 ppm.

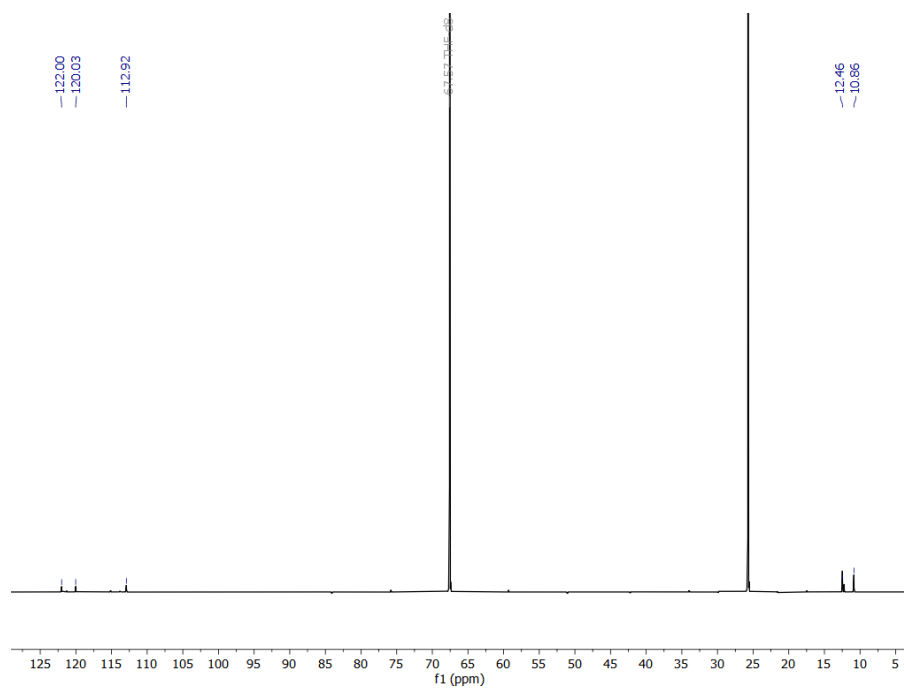

**Figure S16.**  $^{13}\text{C}\{^1\text{H}\}$  NoD NMR in THF- $\text{D}_8$  of **3-La**.

### Synthesis of $\text{NdL}(\text{Cp}^{\text{Me4}})_2$ (**1-Nd**)

In a glovebox, to a magnetically stirred solution of  $\text{Nd}(\text{Cp}^{\text{Me4}})_3$  (54.9 mg, 0.108 mmol, 1 equiv.) in toluene (50 mL), **HL** (34.1 mg, 0.108 mmol, 1 equiv.) was added and the blue solution stirred overnight. After this time a color change to green was observed, volatiles were removed by vacuum evaporation and the resulting blue solid washed with cold ( $-30^\circ\text{C}$ ) hexane (2 x 2 ml) to afford  $\text{NdL}(\text{Cp}^{\text{Me4}})_2$ . Yield: 64%. Diffraction quality crystals were grown from a concentrated toluene solution at  $-30^\circ\text{C}$ .

Anal. Calcd for:  $\text{C}_{38}\text{H}_{55}\text{N}_2\text{ONd}$ : C, 65.19; H, 7.92; N, 4.00. Found: C, 65.47; H, 7.73; N, 3.82.

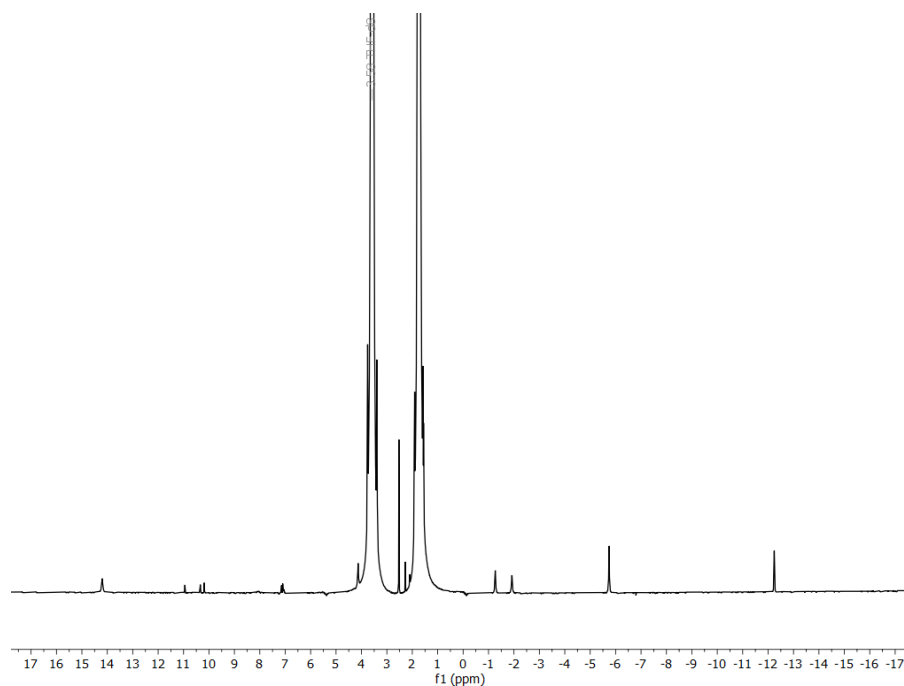

**Figure S17.**  $^1\text{H}$  NoD NMR in THF of **1-Nd**.

### Synthesis of $\text{SmL}(\text{Cp}^{\text{Me4}})_2$ (**1-Sm**)

In a glovebox, to a magnetically stirred solution of  $\text{Sm}(\text{Cp}^{\text{Me4}})_3$  (24.0 mg, 0.0460 mmol, 1 equiv.) in toluene (2 mL), **HL** (14.7 mg, 0.046 mmol, 1 equiv.) was added and the red solution stirred overnight. After this time, volatiles were removed by vacuum evaporation and the yellow solid washed with cold ( $-30^\circ\text{C}$ ) hexane (2 x 2 ml) to afford  $\text{SmL}(\text{Cp}^{\text{Me4}})_2$ . Yield: 59%. Diffraction quality crystals were grown from a concentrated toluene solution at  $-30^\circ\text{C}$ .

Anal. Calcd for: C<sub>38</sub>H<sub>55</sub>N<sub>2</sub>OSm: C, 64.54; H, 7.98; N, 4.00. Found: C, 64.75; H, 8.43; N, 4.40.

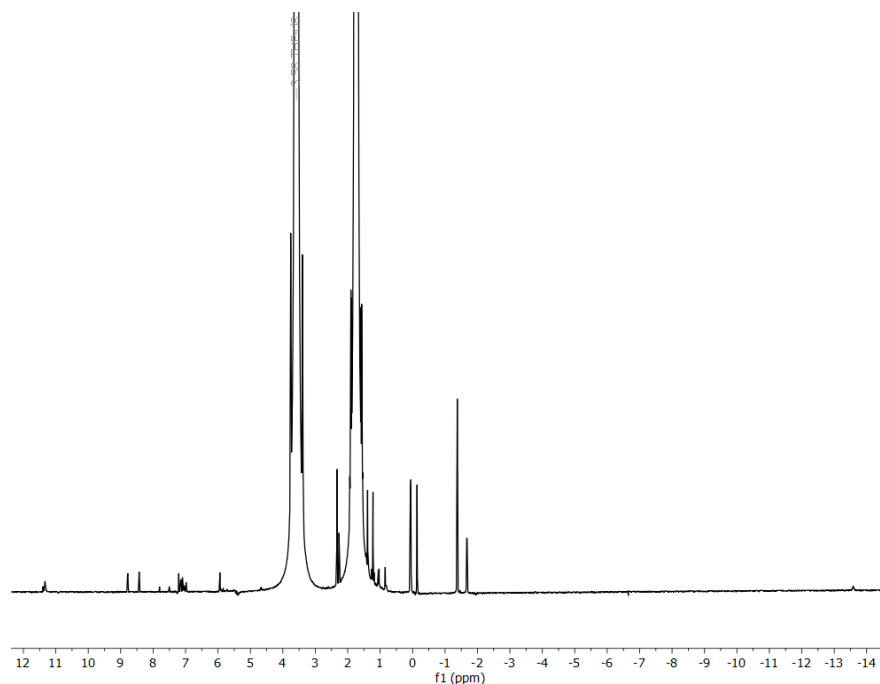

**Figure S18.** <sup>1</sup>H NoD NMR in THF of **1-Sm**.

### Synthesis of [MgBnL]<sub>2</sub> (7-Mg)

To a cold (−78 °C) solution of **HL** (31.4 mg, 0.01 mmol, 1 equiv.) in THF (2 mL) was added a cold solution of MgBn<sub>2</sub>(THF)<sub>2</sub> (35.0 mg, 0.01 mmol, 1 equiv.) dropwise over ten minutes. The mixture was allowed to warm to room temperature, with stirring, overnight. After this period, volatiles were removed by vacuum evaporation, and the cream powder washed with cold hexanes. Yield: 59%. Diffraction quality crystals were grown from a concentrated toluene solution at −30°C.

<sup>1</sup>H NMR (500 MHz, C<sub>6</sub>D<sub>6</sub>, 298 K) : δ 7.59 (1H, d, J<sub>H-H</sub> = 2.6, CH<sub>im</sub>), 6.94 (d, J<sub>H-H</sub> = 2.4, 1H, CH<sub>im</sub>), 6.86 (2H, t, J<sub>H-H</sub> = 7.5, CH<sub>Bn</sub>), 6.69 (2H, d, J<sub>H-H</sub> = 7.6, CH<sub>Bn</sub>), 6.56 (1H, d, J<sub>H-H</sub> = 1.7, CH<sub>Ph</sub>), 6.53 (1H, J<sub>H-H</sub> = 7.2, CH<sub>Bn</sub>), 5.82 (1H, d, J<sub>H-H</sub> = 1.7, CH<sub>Ph</sub>), 3.13 (1H, h, J<sub>H-H</sub> = 6.6, CH<sub>iPr</sub>), 2.00 (2H, dd, J<sub>H-H</sub> = 8.9, CH<sub>2Bn</sub>), 1.83 (9H, s, CH<sub>3tBu</sub>), 1.35 (9H, s, CH<sub>3tBu</sub>), 0.71 (3H, d, J<sub>H-H</sub> = 6.6, CH<sub>3iPr</sub>), 0.62 (3H, d, J<sub>H-H</sub> = 6.6, CH<sub>3iPr</sub>). <sup>13</sup>C{<sup>1</sup>H} NMR (125 MHz, C<sub>6</sub>D<sub>6</sub>, 298 K): δ 156.3 (s, C-O), 142.7 (s, C<sub>Ph</sub>), 140.8 (s, C<sub>Ph</sub>), 130.7 (s, NCN), 124.1 (s, C<sub>Bn</sub>),

123.8 (s, C<sub>Bn</sub>) 123.7 (s, C<sub>im</sub>), 119.7 (s, C<sub>Ph</sub>), 118.9 (s, C<sub>im</sub>), 117.7 (s, C<sub>PhH</sub>), 116.5 (s, C<sub>PhH</sub>), 116.3 (s, C<sub>Bn</sub>),  
 51.9 (s, C<sub>HiPr</sub>), 36.2 (s, C<sub>CH3</sub>), 34.5 (s, C<sub>CH3</sub>), 31.8 (s, C<sub>tBu</sub>), 32.6 (s, C<sub>tBu</sub>), 25.1 (s, C<sub>H2Bn</sub>), 23.8 (s, C<sub>iPr</sub>), 23.3  
 (s, C<sub>iPr</sub>)

Anal. Calcd for: C<sub>54</sub>H<sub>74</sub>Mg<sub>2</sub>N<sub>4</sub>O<sub>2</sub>: C, 75.43; H, 8.68; N, 6.52. Found: C, 71.67; H, 8.26; N, 6.35.

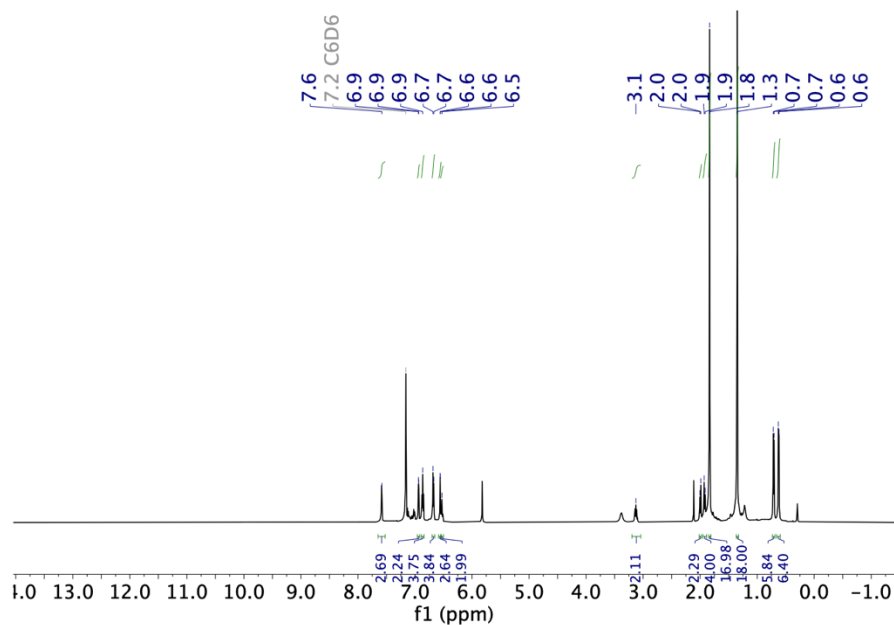

**Figure S19.** <sup>1</sup>H NMR in C<sub>6</sub>D<sub>6</sub> of **7-Mg**.

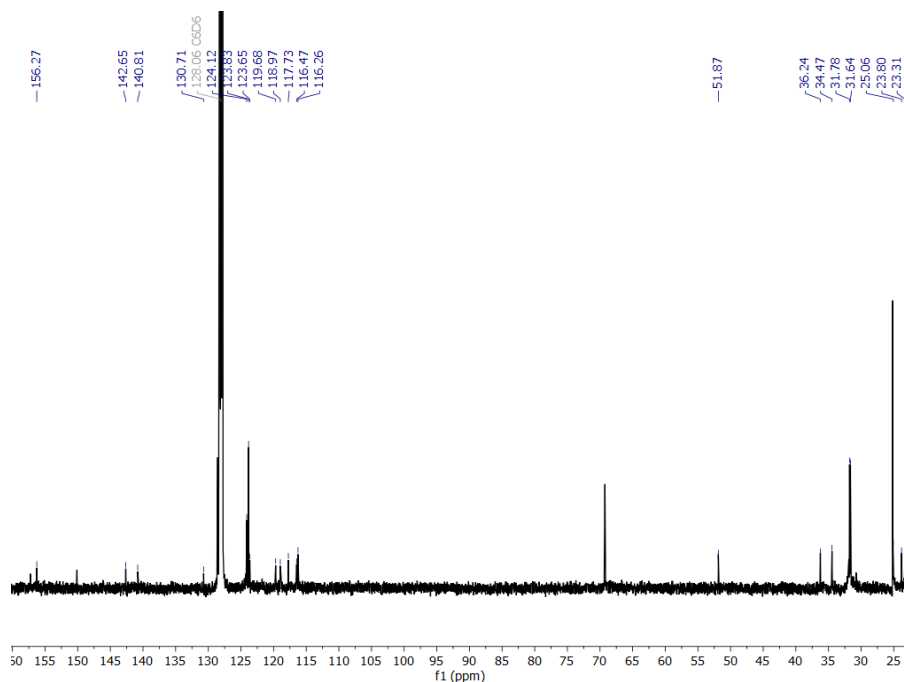

**Figure S20.**  $^{13}\text{C}\{^1\text{H}\}$  NMR in  $\text{C}_6\text{D}_6$  of **7-Mg**.

### Synthesis of **[MgL]<sub>2</sub> (8-Mg)**

To a solution of **HL** (62.8 mg, 0.01 mmol, 2 equiv.) in THF (2 mL) was added a solution of  $\text{MgBn}_2(\text{THF})_2$  (35.0 mg, 0.01 mmol, 1 equiv.). The mixture was stirred overnight. After this period, volatiles were removed by vacuum evaporation, and the cream powder washed with cold hexanes. Yield: 74% Diffraction quality crystals were grown from a concentrated toluene solution at  $-30^\circ\text{C}$ .

$^1\text{H}$  NMR (500 MHz,  $\text{C}_6\text{D}_6$ , 298 K) :  $\delta$  7.57 (2H, d,  $J_{\text{H-H}} = 2.5$ ,  $\text{CH}_{\text{im}}$ ), 7.2 (2H, d,  $J_{\text{H-H}} = 2.5$ ,  $\text{CH}_{\text{im}}$ ), 7.00 (2H, d,  $J_{\text{H-H}} = 1.8$ ,  $\text{C}_{\text{Ph}}$ ), 6.22 (2H, d,  $J_{\text{H-H}} = 2.0$ ,  $\text{C}_{\text{Ph}}$ ), 4.18 (2H, br s,  $\text{CH}_{\text{iPr}}$ ), 1.78 (18H, s,  $\text{CH}_{3\text{tBu}}$ ), 1.43 (18H, s,  $\text{CH}_{3\text{tBu}}$ ), 1.01 (6H, d,  $J_{\text{H-H}} = 6.7$ ,  $\text{CH}_{3\text{iPr}}$ ), 0.90 (6H, d,  $J_{\text{H-H}} = 6.8$ ,  $\text{CH}_{3\text{iPr}}$ ).  $^{13}\text{C}\{^1\text{H}\}$  NMR (125 MHz,  $\text{C}_6\text{D}_6$ , 298 K):  $\delta$  156.8 (s,  $\text{C}_{\text{O}}$ ), 141.7 ( $\text{C}_{\text{Ph}}$ ), 134.4 (s,  $\text{NCN}$ ), 129.3 (s,  $\text{C}_{\text{Ph}}$ ), 128.6 (s,  $\text{C}_{\text{Ph}}$ ), 125.7 (s,  $\text{C}_{\text{Ph}}$ ), 122.3 (s,  $\text{C}_{\text{Ph}}$ ), 120.6 (s,  $\text{CH}_{\text{im}}$ ), 116.5 (s,  $\text{CH}_{\text{im}}$ ), 115.5 (s,  $\text{C}_{\text{Ph}}$ ), 52.5 (s,  $\text{CH}_{\text{iPr}}$ ), 36.4 (s,  $\text{C}_{\text{tBu}}$ ), 34.3 (s,  $\text{C}_{\text{tBu}}$ ), 32.2 (s,  $\text{C}_{(\text{CH}_3)_3}$ ), 30.2 (s,  $\text{C}_{(\text{CH}_3)_3}$ ), 23.9 (s,  $\text{C}_{\text{iPr}}$ ), 23.4 ( $\text{C}_{\text{iPr}}$ ).

Anal. Calcd for:  $\text{C}_{40}\text{H}_{58}\text{N}_4\text{O}_2\text{Mg}$ : C, 73.77; H, 8.98; N, 8.60. Found: C, 71.45; H, 9.22; N, 7.27. [Multiple attempts]

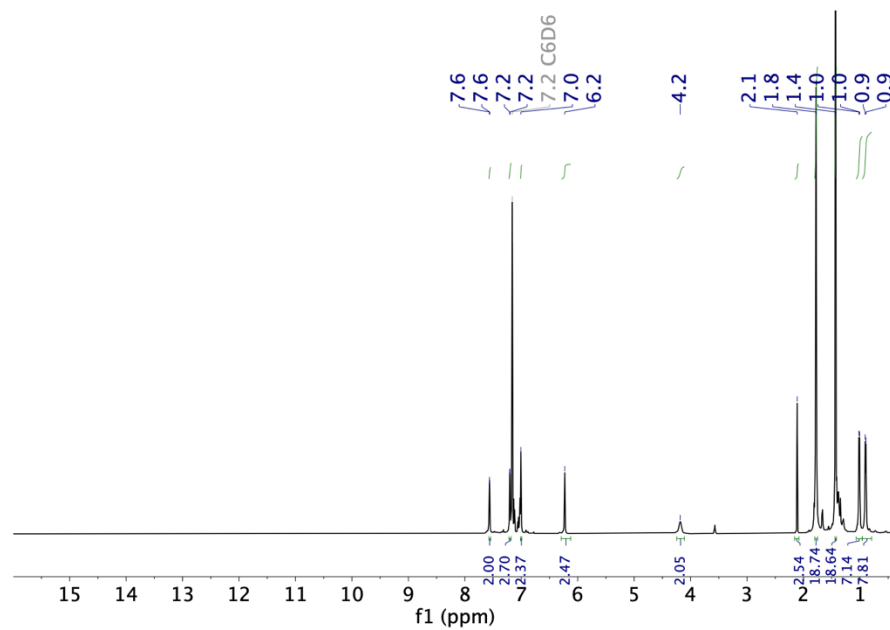

Figure S21.  $^1\text{H}$  NMR in  $\text{C}_6\text{D}_6$  of **8-Mg**.

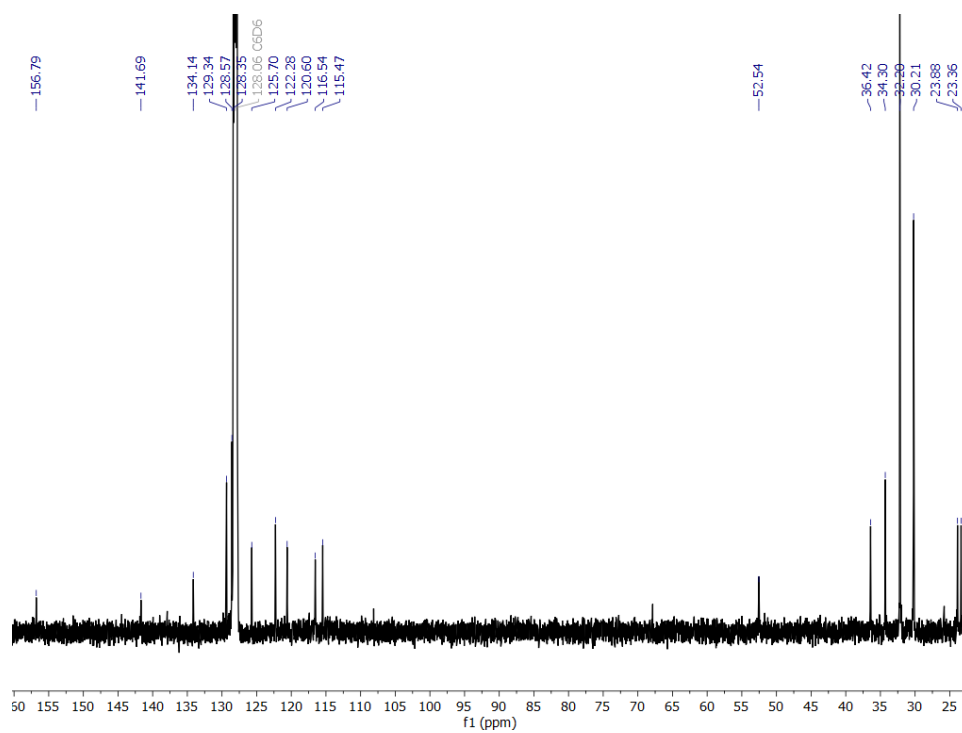

Figure S22.  $^{13}\text{C}\{^1\text{H}\}$  NMR in  $\text{C}_6\text{D}_6$  of **8-Mg**.



### S3 Absorption and Fluorescence Data

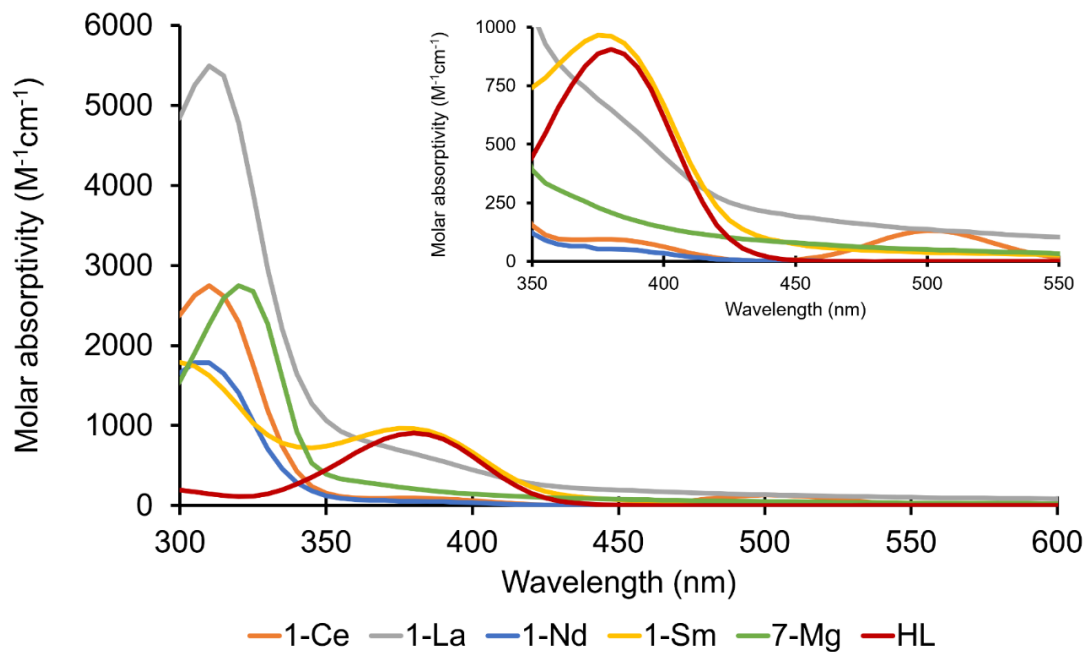

**Figure S23:** Overlaid UV-Vis spectra of **1-Ce** (orange), **1-La** (grey), **1-Nd** (blue), **1-Sm** (yellow), **7-Mg** (green) and proligand **HL** (red) in THF Cerium metal-centered absorption at 505 nm expanded for clarity.

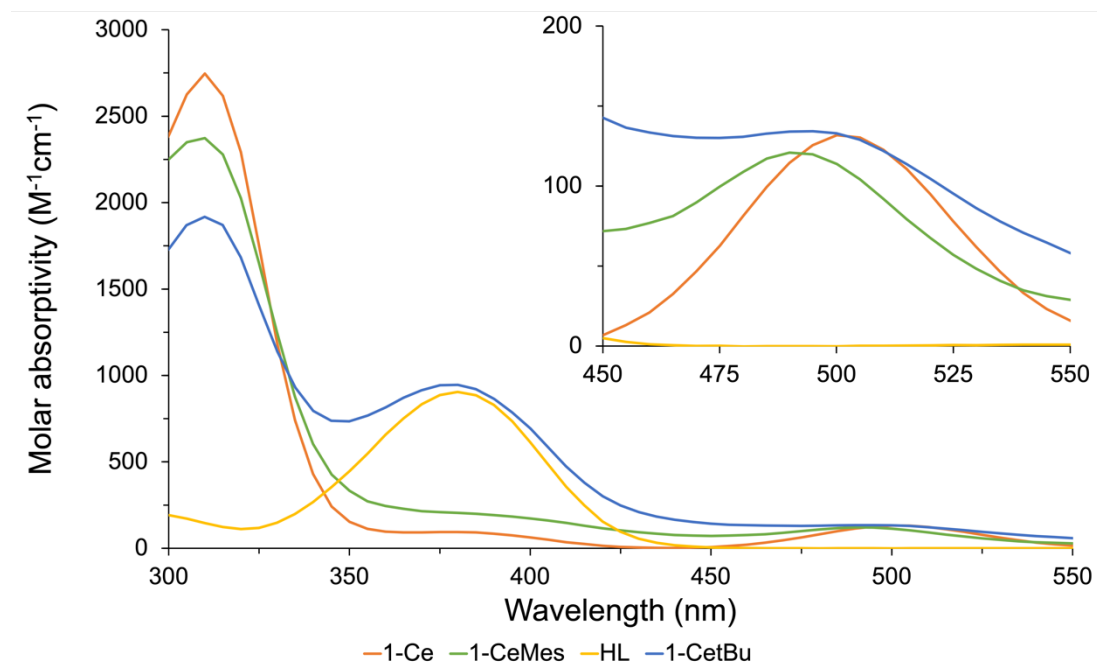

**Figure S24:** Overlaid UV-Vis spectra of **1-Ce** (orange), **1-CeMes** (green), **1-Ce<sup>t</sup>Bu** (blue), and **HL** (yellow), in THF Cerium metal-centered absorptions expanded for clarity

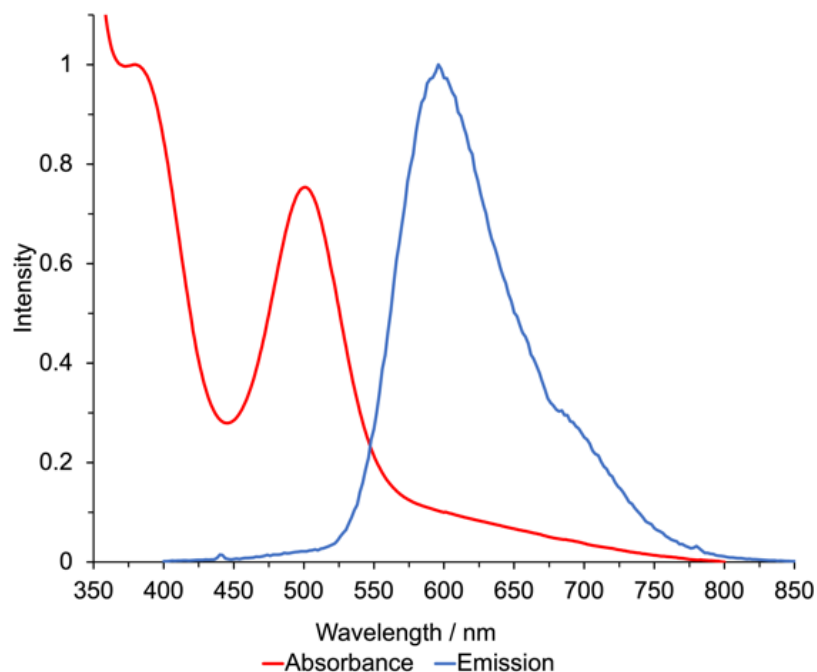

**Figure S25.** Absorption (red) and emission (blue) spectra of **1-Ce** recorded in THF. The emission spectrum was collected with an excitation wavelength of 390 nm and calibrated to the detector efficiency.

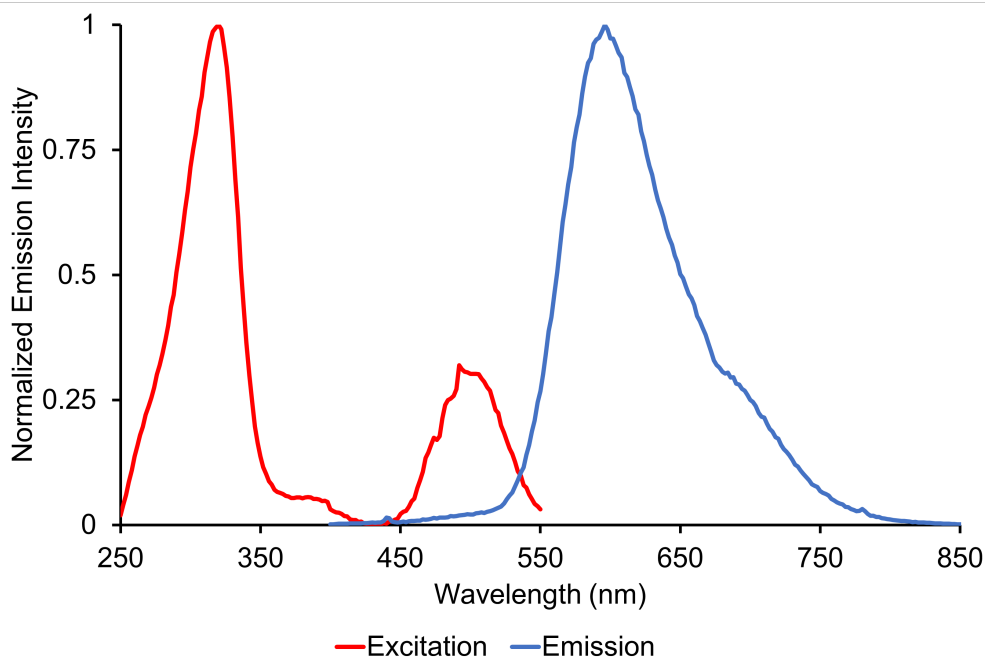

**Figure S26.** Emission and excitation spectra of **1-Ce** recorded in THF. The emission spectrum was collected with an excitation wavelength of 390 nm; the excitation was monitored at an emission wavelength of 600 nm. All data were calibrated to the detector efficiency and normalized.

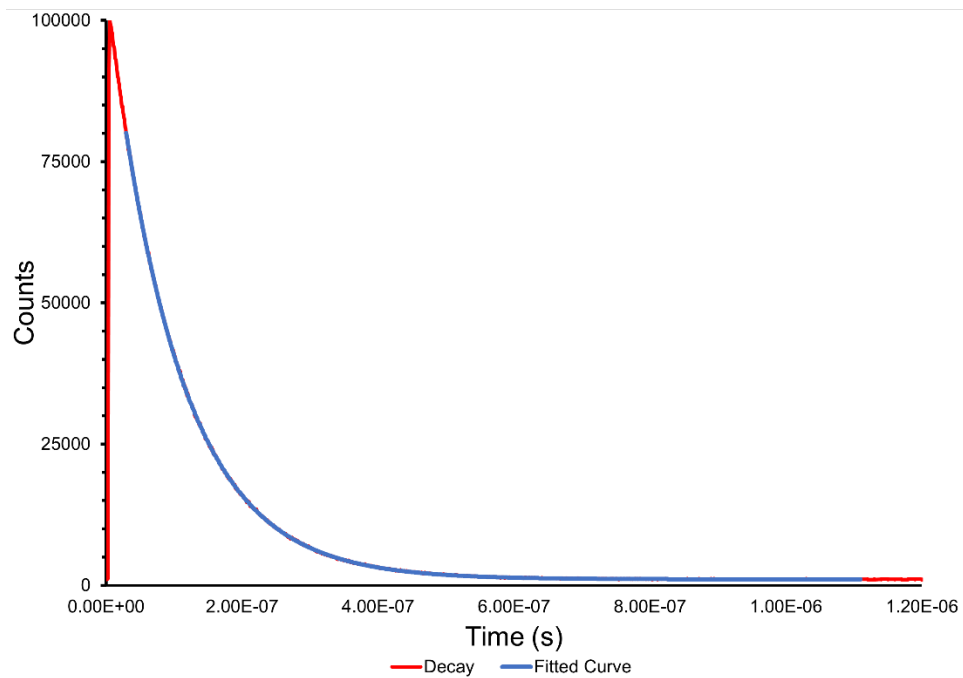

**Figure S27.** Lifetime decay of **1-Ce** recorded in toluene.  $\tau_1[\text{ns}] = 101.941 \pm 0.039$ .

## S4 Electrochemistry

### S4.1 Cyclic Voltammograms

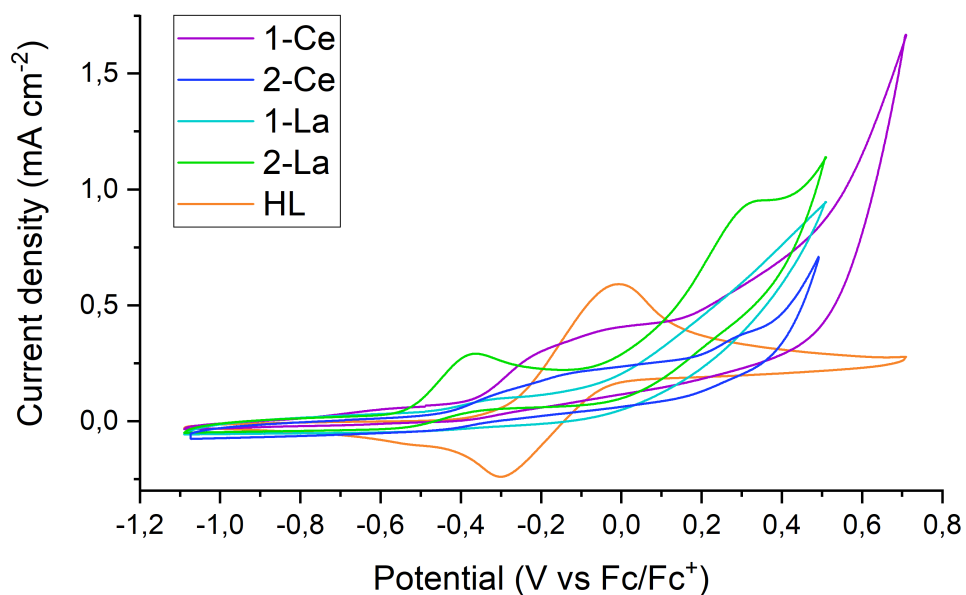

**Figure S28.** Cyclic voltammograms of **1-Ce** (purple), **2-Ce** (dark blue), **1-La** (light blue), **2-La** (green) and **HL** (orange) in THF with 0.1 M [<sup>t</sup>Bu<sub>4</sub>N][PF<sub>6</sub>] supporting electrolyte. [analyte] = ca. 5 mM;  $\nu = 0.1$  V/sec.

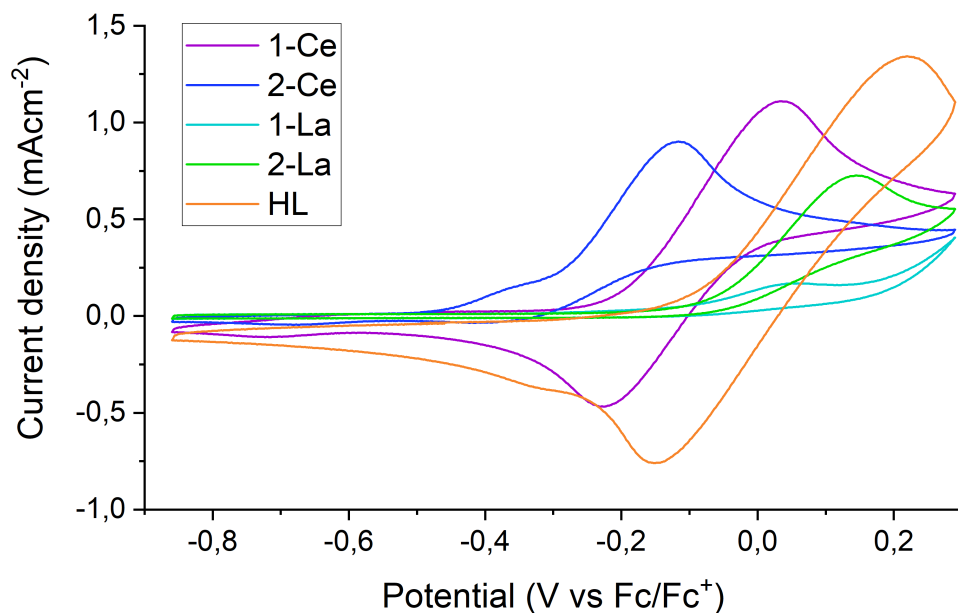

**Figure S29.** Cyclic voltammograms of **1-Ce** (purple), **2-Ce** (dark blue), **1-La** (light blue), **2-La** (green) and **HL** (orange) in THF with 0.085 M [<sup>t</sup>Bu<sub>4</sub>N][BPh<sub>4</sub>] supporting electrolyte. [analyte] = ca. 5 mM;  $\nu = 0.5$  V/sec.

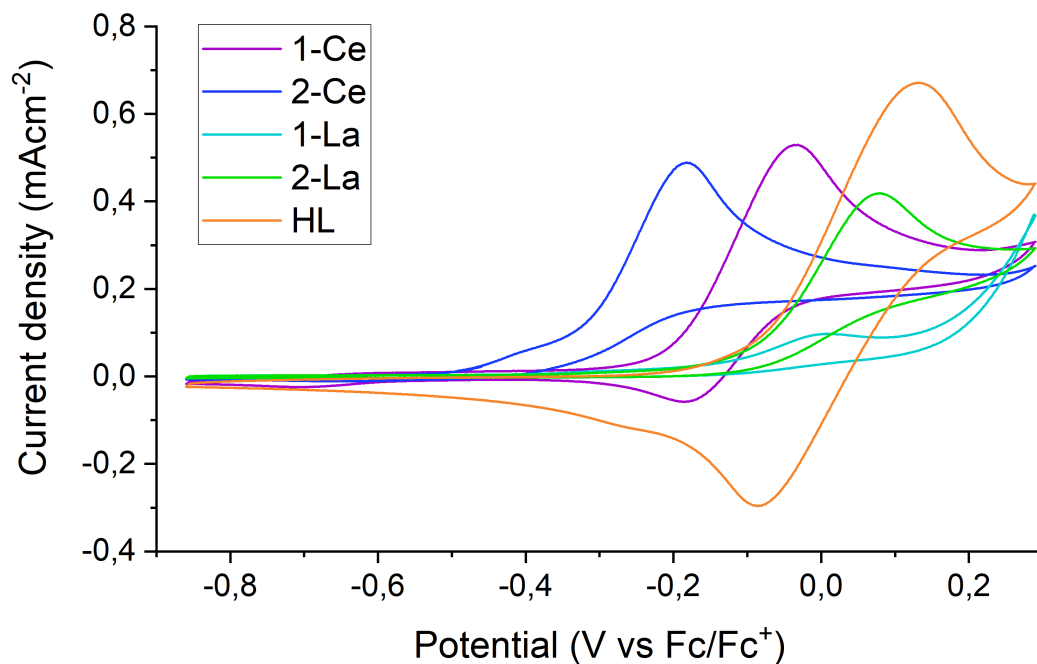

**Figure S30.** Cyclic voltammograms of **1-Ce** (purple), **2-Ce** (dark blue), **1-La** (light blue), **2-La** (green) and **HL** (orange) in THF with 0.085 M [<sup>t</sup>Bu<sub>4</sub>N BPh<sub>4</sub>] supporting electrolyte. [analyte] = ca. 5 mM;  $\nu = 0.1$  V/sec.

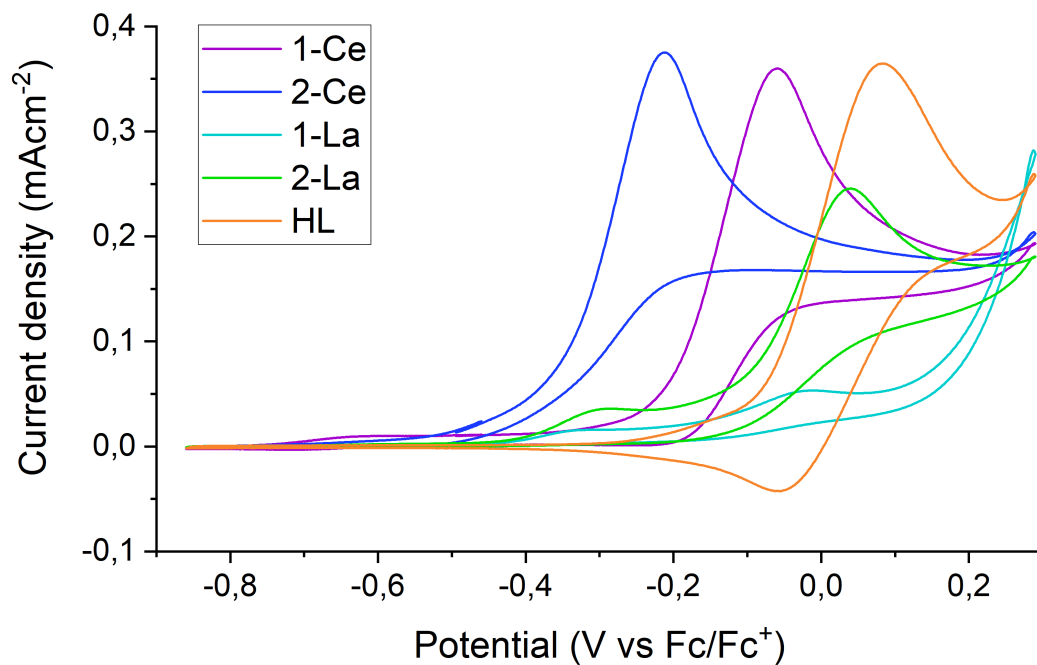

**Figure S31.** Cyclic voltammograms of **1-Ce** (purple), **2-Ce** (dark blue), **1-La** (light blue), **2-La** (green) and **HL** (orange) in THF with 0.085 M [<sup>t</sup>Bu<sub>4</sub>N][BPh<sub>4</sub>] supporting electrolyte. [analyte] = ca. 5 mM;  $\nu = 0.02$  V/sec.

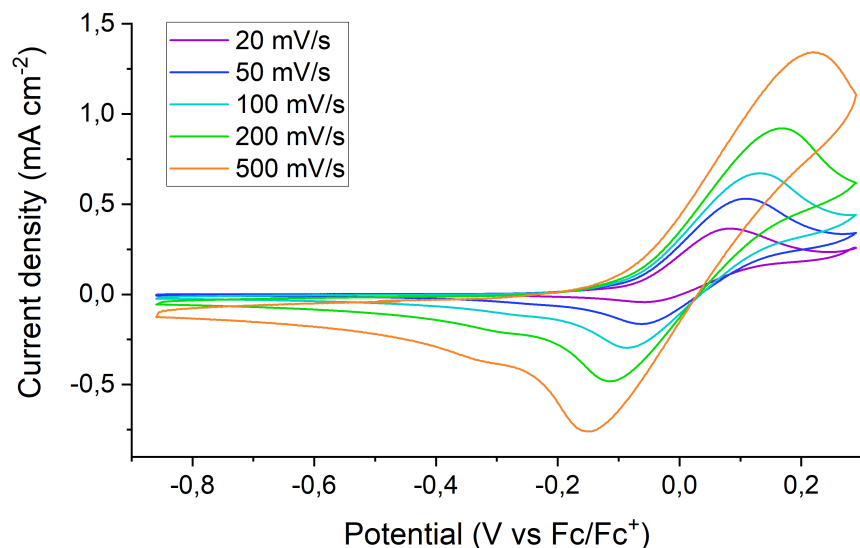

**Figure S32.** Cyclic voltammograms **HL** in THF with 0.085 M [<sup>n</sup>Bu<sub>4</sub>N][BPh<sub>4</sub>] supporting electrolyte at different scan speeds between 0.02 and 0.5 V/sec. [analyte] = ca. 5 mM. The  $E_{1/2}$  of the partially reversible HL/HL<sup>+</sup> redox couple was determined to be -0.00 V vs. Fc/Fc<sup>+</sup>. Irreversibility of the redox feature is observed at slow scan speeds, which is attributed to a chemical reaction of the oxidized species.

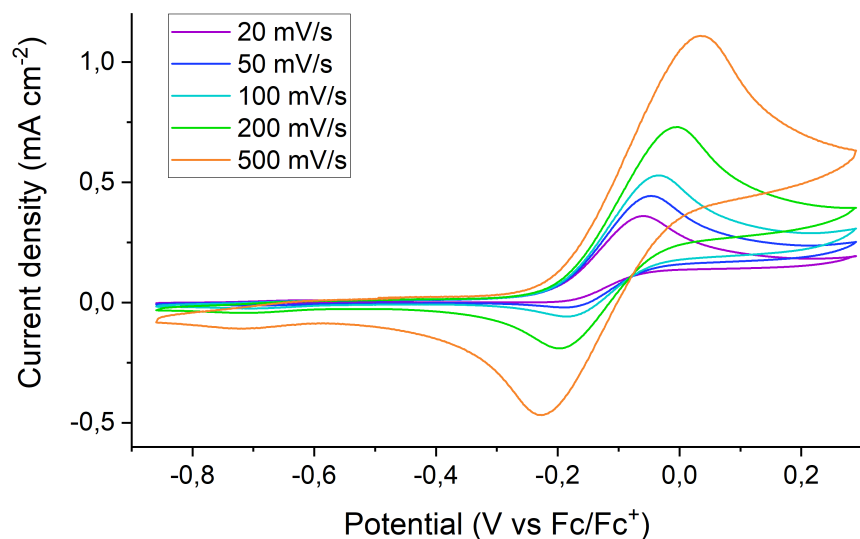

**Figure S33.** Cyclic voltammograms **1-Ce** in THF with 0.085 M [<sup>n</sup>Bu<sub>4</sub>N][BPh<sub>4</sub>] supporting electrolyte at different scan speeds between 0.02 and 0.5 V/sec. [analyte] = ca. 5 mM. The  $E_{1/2}$  of the partially reversible Ce<sup>III</sup>/Ce<sup>IV</sup> redox couple was determined to be -0.15 V vs. Fc/Fc<sup>+</sup>. Irreversibility of the redox feature is observed at slow scan speeds, which is attributed to a chemical reaction of the oxidized species similar to the case of HL/HL<sup>+</sup>.

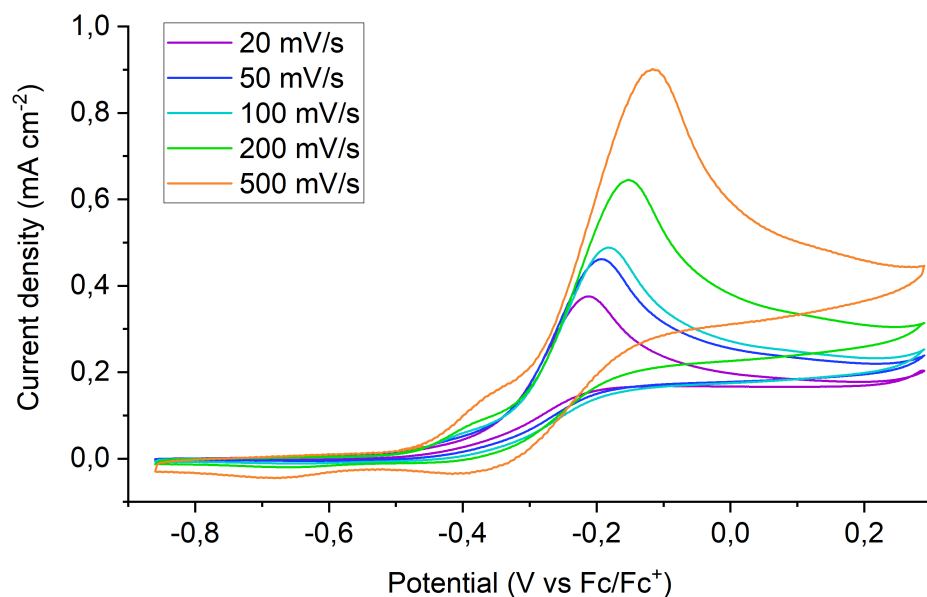

**Figure S34.** Cyclic voltammograms **2-Ce** in THF with 0.085 M [<sup>n</sup>Bu<sub>4</sub>N][BPh<sub>4</sub>] supporting electrolyte at different scan speeds between 0.02 and 0.5 V/sec. [analyte] = ca. 5 mM. A fully irreversible oxidation is observed with an onset around -0.3 V vs. Fc/Fc<sup>+</sup>.

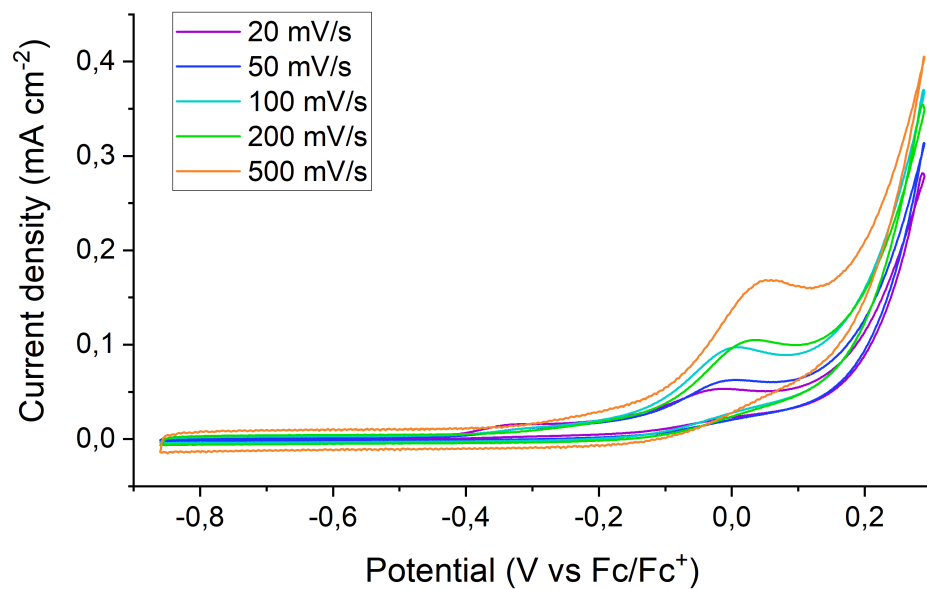

**Figure S35.** Cyclic voltammograms **1-La** in THF with 0.085 M [<sup>n</sup>Bu<sub>4</sub>N][BPh<sub>4</sub>] supporting electrolyte at different scan speeds between 0.02 and 0.5 V/sec. [analyte] = ca. 5 mM. A minor component shows an irreversible oxidation with an onset around -0.15 V vs. Fc/Fc<sup>+</sup>, followed by a larger increase in oxidative current which is attributed to the main component (**1-La**) with an onset around 0.15 V vs. Fc/Fc<sup>+</sup>.

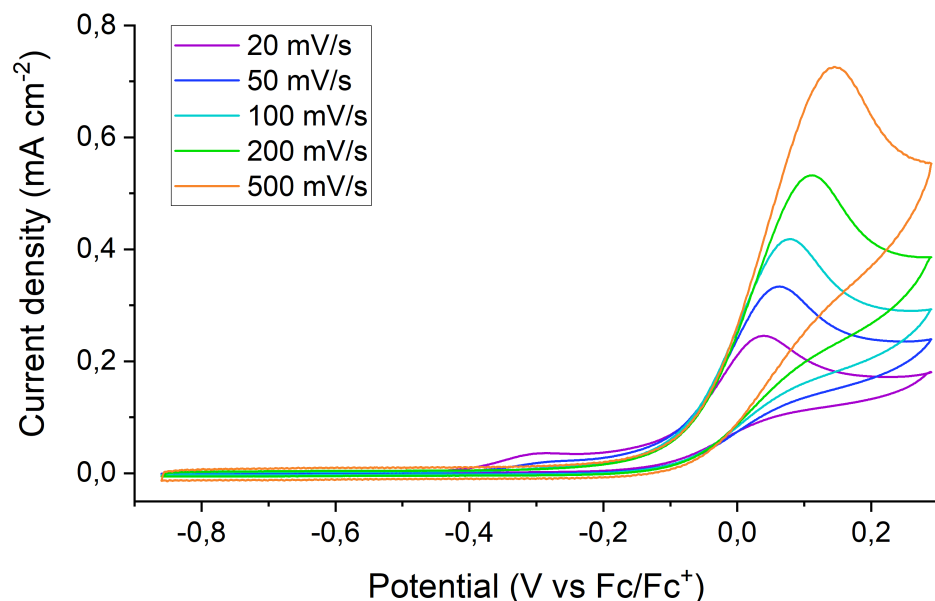

**Figure S36.** Cyclic voltammograms **2-La** in THF with 0.085 M [<sup>n</sup>Bu<sub>4</sub>N BPh<sub>4</sub>] supporting electrolyte at different scan speeds between 0.02 and 0.5 V/sec. [analyte] = ca. 5 mM. A fully irreversible oxidation is observed with an onset around -0.05 V vs. Fc/Fc<sup>+</sup>.

#### S4.2 Rehm Weller Calculation for **1-Ce**

The excited-state reduction potential ( $E_{1/2red}^*$ ) of **1-Ce** was calculated using the Rehm-Weller formalism (Equation 1)

$$E_{1/2red}^* = E_{1/2red} - E_{0,0} + \omega \quad (1)$$

$E_{1/2red}$  is the ground state reduction potential between the Ce<sup>III</sup>/Ce<sup>IV</sup> redox couple.  $E_{0,0}$  is the energy difference between 0<sup>th</sup> vibrational states of ground state and excited states which can be approximated by emission energy.  $\omega$  is the work function which describes electrostatic interactions due to the separation of charges upon the redox event.  $\omega$  is relatively small and is generally omitted.

$E_{1/2red}$  was determined for **1-Ce** in THF solution by a cyclic voltammetry experiment at scan speeds between 0.02 and 0.5 V/sec. (Figure S33) The  $E_{1/2red}$  of the Ce<sup>III</sup>/Ce<sup>IV</sup> redox couple was determined to be -0.15 V vs. Fc/Fc<sup>+</sup>.  $E_{0,0}$  was determined by the emission maximum (Figure S26) at 605 nm resulting in a value of 2.05 V. Therefore:

$$\begin{aligned} E_{1/2red}^* &= E_{1/2} - E_{0,0} \\ E_{1/2} &= -0.15 \text{ V (Fc/Fc}^+) \\ E_{0,0} &= 2.05 \text{ V} \\ E_{1/2}^* &= -0.15 \text{ V} - 2.05 \text{ V} \\ E_{1/2}^* &= -2.2 \text{ V} \end{aligned}$$



## **S5 Stoichiometric C-F activation of PhCF<sub>3</sub>**

### **S5.1 Preliminary reactions**

#### **S5.1.1 General procedure and results**

In a glovebox, a Young NMR tube was charged with metal complex (0.0100 mmol, 1 equiv.) and THF (0.5 mL). PhCF<sub>3</sub> (1.23 μL, 0.0100 mmol, 1 equiv.) was then added using a micropipette. The sample was then irradiated with light and monitored periodically by <sup>1</sup>H and <sup>19</sup>F NMR spectroscopy. Final time point measurements were collected after 48 hours. Little conversion was seen in these reactions, hypothesized to be due to binding competition with THF solvent.

**Table S1.** Calculated conversion of PhCF<sub>3</sub> to PhCF<sub>2</sub>H with yields determined by <sup>19</sup>F NMR spectroscopy.

| <b>Complex</b> | <b>Conversion to PhCF<sub>2</sub>H, %</b>       |
|----------------|-------------------------------------------------|
| <b>1-Ce</b>    | 2.7                                             |
| <b>2-Ce</b>    | 0.2                                             |
| <b>3-Ce</b>    | 0                                               |
| <b>4-Ce</b>    | 2.7                                             |
| <b>5-Ce</b>    | 0                                               |
| <b>6-Ce</b>    | 3.6 (7.4% PhCF <sub>2</sub> CH <sub>2</sub> Ph) |
| <b>1-La</b>    | 0.8                                             |
| <b>7-Mg</b>    | 10 (4.0% PhCF <sub>2</sub> CH <sub>2</sub> Ph)  |
| <b>8-Mg</b>    | 0                                               |

### S5.1.2 $^{19}\text{F}$ NMR spectra

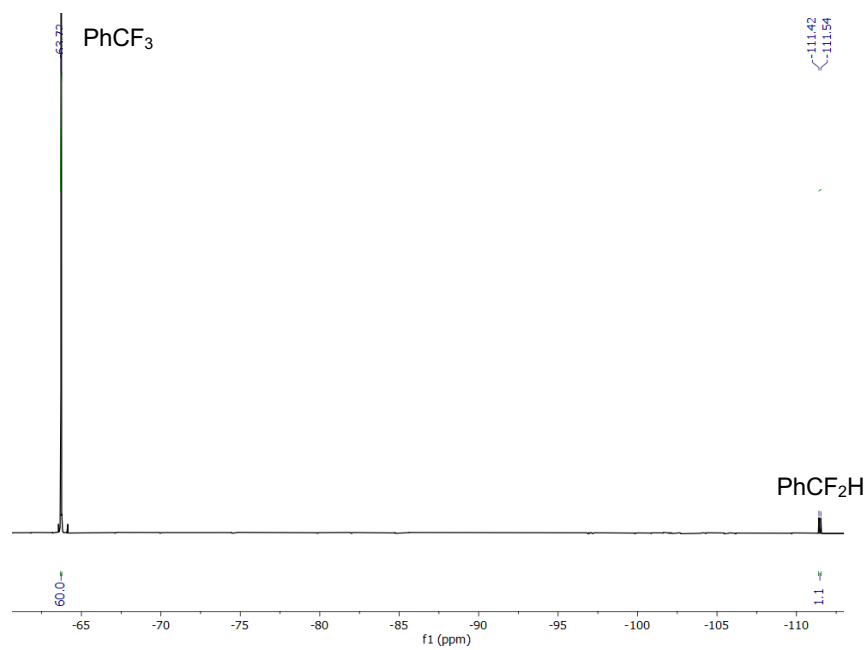

**Figure S37.**  $^{19}\text{F}$  NMR in THF- H<sub>8</sub> **1-Ce** with 1 equiv. PhCF<sub>3</sub> following 48 hours of irradiation under a 40 W Kessil A160WE Tuna Blue lamp.

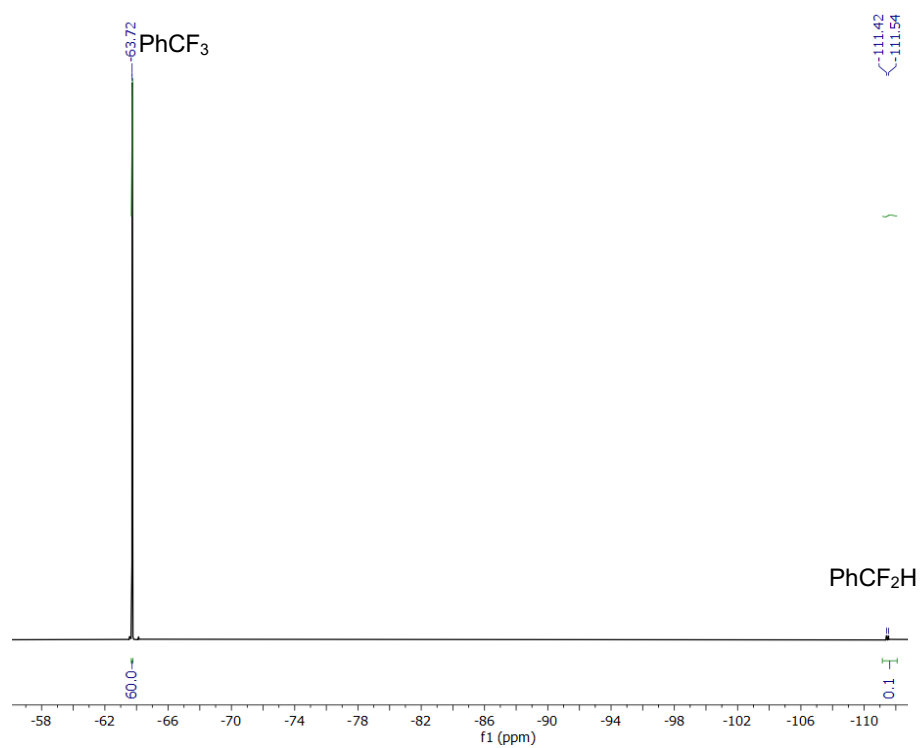

**Figure S38.**  $^{19}\text{F}$  NMR in THF- H<sub>8</sub> **2-Ce** with 1 equiv. PhCF<sub>3</sub> following 48 hours of irradiation under a 40 W Kessil A160WE Tuna Blue lamp.

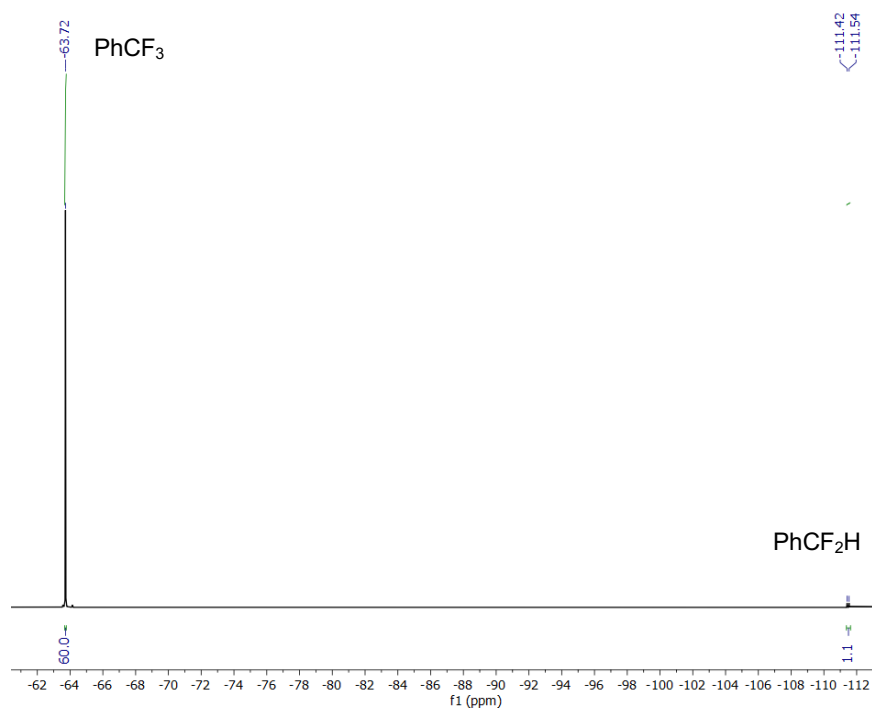

**Figure S39.**  $^{19}\text{F}$  NMR in THF- $\text{H}_8$  **4-Ce** with 5 equiv.  $\text{PhCF}_3$  following 48 hours of irradiation under a 40 W Kessil A160WE Tuna Blue lamp.

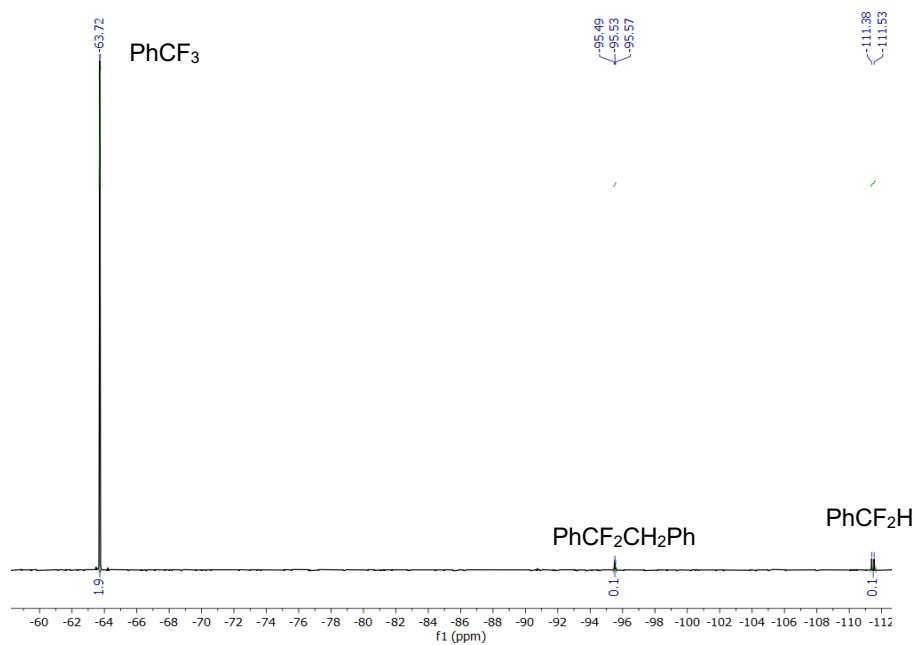

**Figure S40.**  $^{19}\text{F}$  NMR in THF- $\text{H}_8$  **6-Ce** with 1 equiv.  $\text{PhCF}_3$  following 48 hours of irradiation under a 40 W Kessil A160WE Tuna Blue lamp. Generation of  $\text{PhCF}_2\text{CH}_2\text{Ph}$  is observed via benzyl radicals released from **6-Ce** under irradiation.

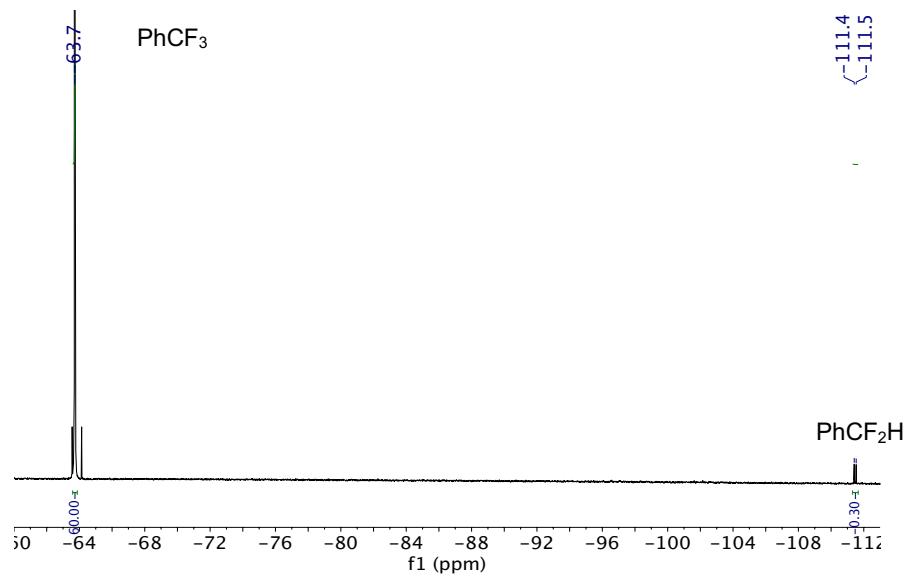

**Figure S41.**  $^{19}\text{F}$  NMR in THF- $\text{H}_8$  **1-La** with 1 equiv.  $\text{PhCF}_3$  following 48 hours of irradiation under a 40 W Kessil A160WE Tuna Blue lamp.

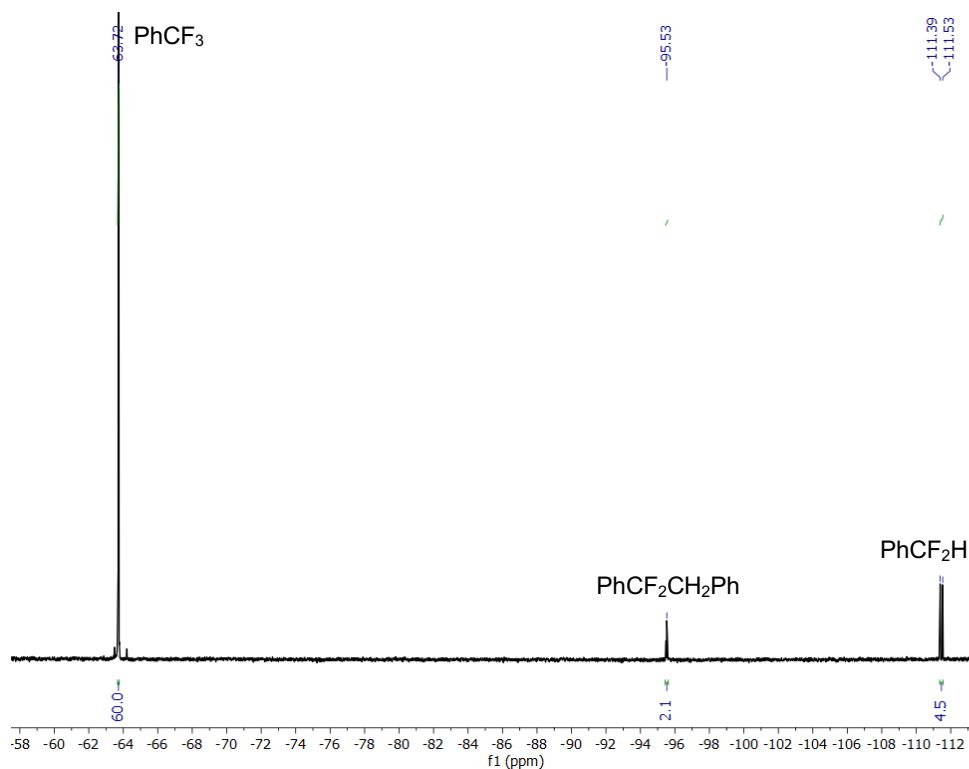

**Figure S42.**  $^{19}\text{F}$  NMR in THF-  $\text{H}_8$  **7-Mg** with 1 equiv.  $\text{PhCF}_3$  following 48 hours of irradiation under a 40 W Kessil A160WE Tuna Blue lamp. Generation of  $\text{PhCF}_2\text{CH}_2\text{Ph}$  is observed via benzyl radicals released from **7-Mg** under irradiation.

## S5.2 Optimized reactions

### S5.2.1 General procedure and results

In a glovebox, a Young NMR tube was charged with metal complex (0.0100 mmol, 1 equiv.) and THF (0.5 mL). PhCF<sub>3</sub> (6.23 μL, 0.0500 mmol, 5 equiv.) was then added using a micropipette. The sample was then irradiated with light and monitored periodically by <sup>1</sup>H and <sup>19</sup>F NMR spectroscopy. Final time point measurements were collected after 120 hours.

**Table S2.** Calculated conversion of PhCF<sub>3</sub> to PhCF<sub>2</sub>H with yields determined by <sup>19</sup>F NMR spectroscopy.

| <b>Complex</b> | <b>Conversion to PhCF<sub>2</sub>H, %</b>                                                     |
|----------------|-----------------------------------------------------------------------------------------------|
| <b>1-Ce</b>    | 75                                                                                            |
| <b>2-Ce</b>    | 5                                                                                             |
| <b>1-La</b>    | 10                                                                                            |
| <b>7-Mg</b>    | 19 (6% PhCF <sub>2</sub> CH <sub>2</sub> Ph<br>arising from Bn transfer<br>from the catalyst) |

### S5.2.2 $^{19}\text{F}$ NMR spectra

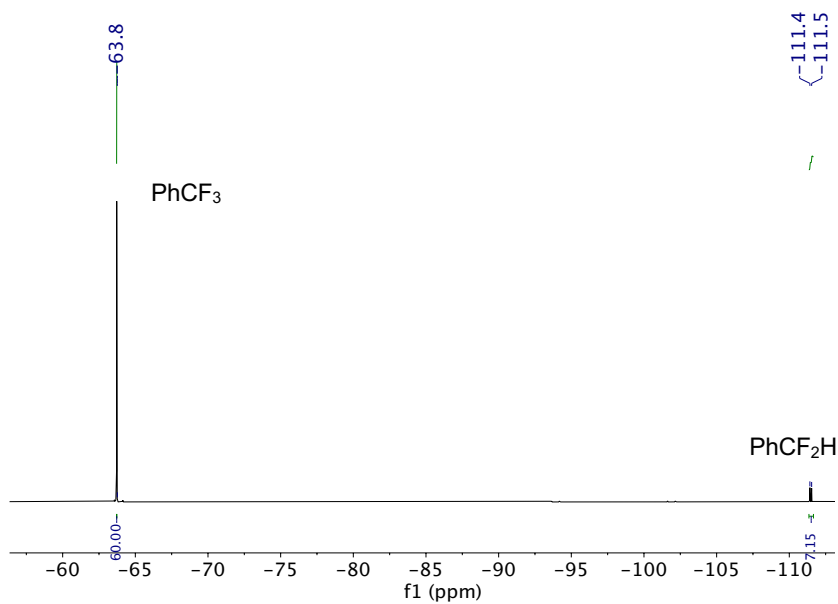

**Figure S43.**  $^{19}\text{F}$  NMR in THF- $\text{H}_8$  **1-Ce** with 5 equiv.  $\text{PhCF}_3$  following 120 hours of irradiation under a 40 W Kessil A160WE Tuna Blue lamp.

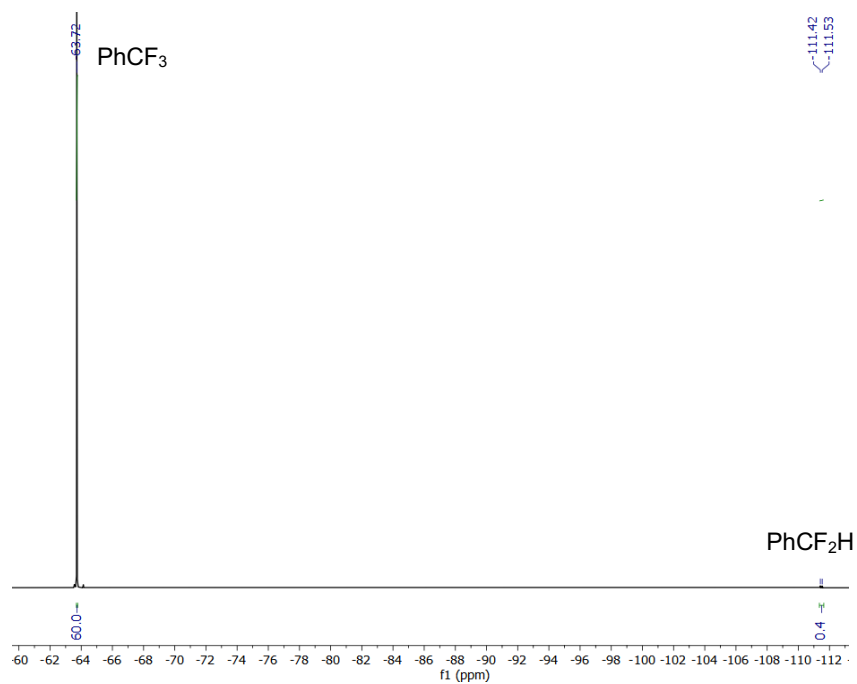

**Figure S44.**  $^{19}\text{F}$  NMR in THF- $\text{H}_8$  **2-Ce** with 5 equiv.  $\text{PhCF}_3$  following 120 hours of irradiation under a 40 W Kessil A160WE Tuna Blue lamp.

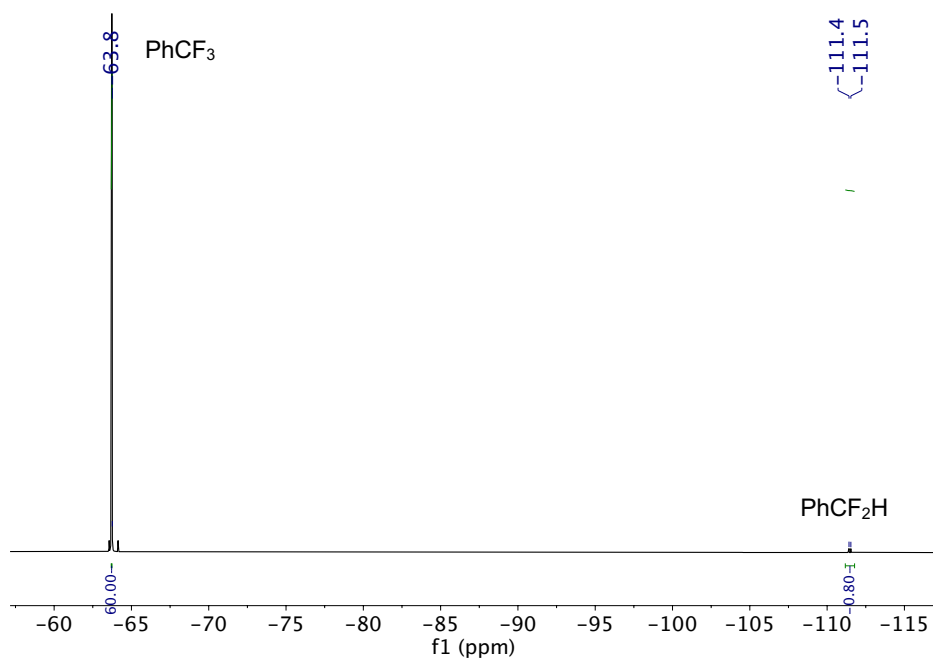

**Figure S45.**  $^{19}\text{F}$  NMR in THF- $\text{H}_8$  **1-La** with 5 equiv.  $\text{PhCF}_3$  following 120 hours of irradiation under a 40 W Kessil A160WE Tuna Blue lamp.

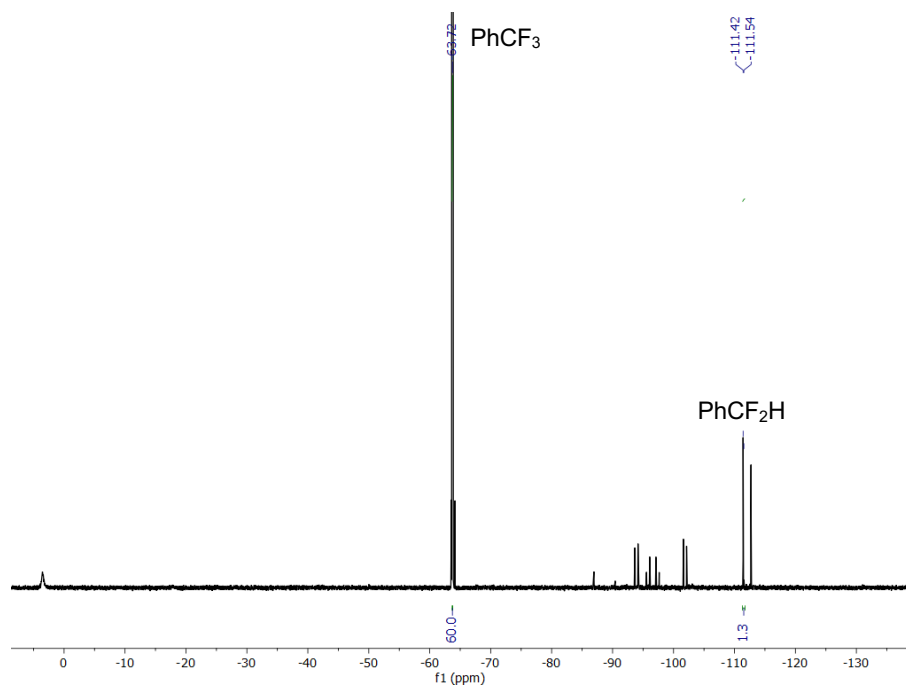

**Figure S46.**  $^{19}\text{F}$  NMR in THF- $\text{H}_8$  **2-La** with 5 equiv.  $\text{PhCF}_3$  following 120 hours of irradiation under a 40 W Kessil A160WE Tuna Blue lamp.

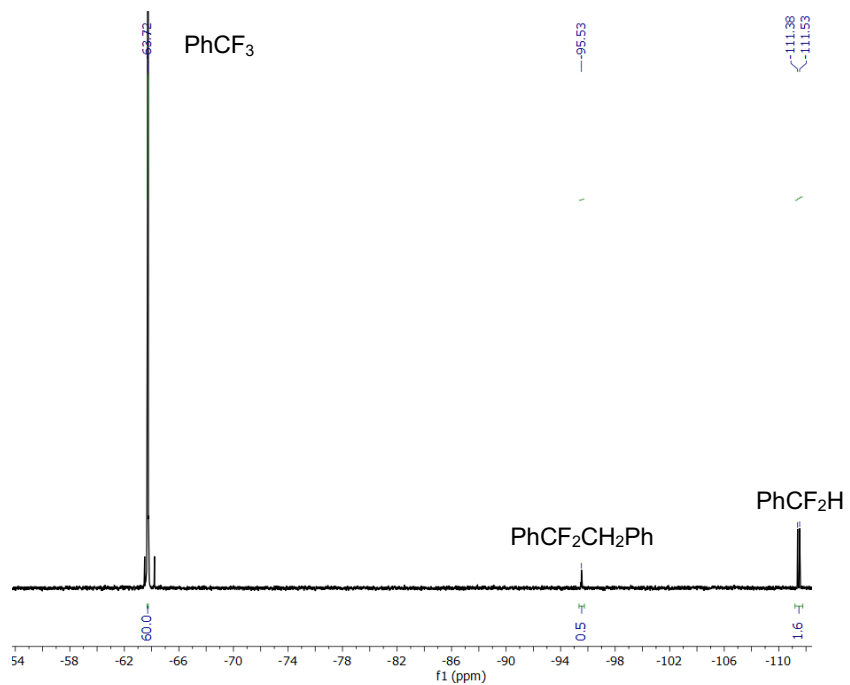

**Figure S47.**  $^{19}\text{F}$  NMR in THF- $\text{H}_8$  **7-Mg** with 5 equiv.  $\text{PhCF}_3$  following 120 hours of irradiation under a 40 W Kessil A160WE Tuna Blue lamp.



## S5.3 Substrate scope

### S5.3.1 General procedure and $^{19}\text{F}$ NMR Spectra

In a glovebox, a Young NMR tube was charged with metal complex (0.0100 mmol, 1 equiv.) and THF (0.5 mL). Fluorinated substrate (0.0500 mmol, 5 equiv.) was then added using a micropipette. The sample was then irradiated with a 40 W Kessil A160WE Tuna Blue lamp and monitored by  $^1\text{H}$  and  $^{19}\text{F}$  NMR spectroscopy after 20 hours. Approximately 25% conversion of hexafluorobenzene to  $\text{C}_6\text{F}_5\text{H}$ , trace reaction for trifluoromethoxybenzene; 1,3-bis(trifluoromethyl)benzene; 1,4-bis(trifluoromethyl)benzene, perfluoro(methylcyclohexane).

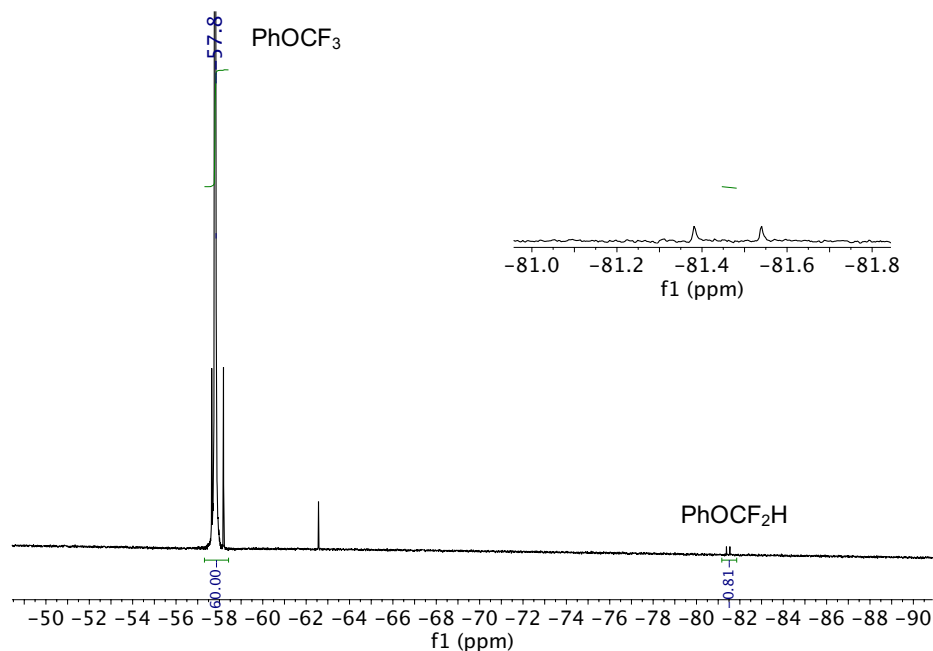

**Figure S48.**  $^{19}\text{F}$  NMR in  $\text{THF-H}_8$  **1-Ce** with 5 equiv. trifluoromethoxybenzene following 20 hours of irradiation under a 40 W Kessil A160WE Tuna Blue lamp.

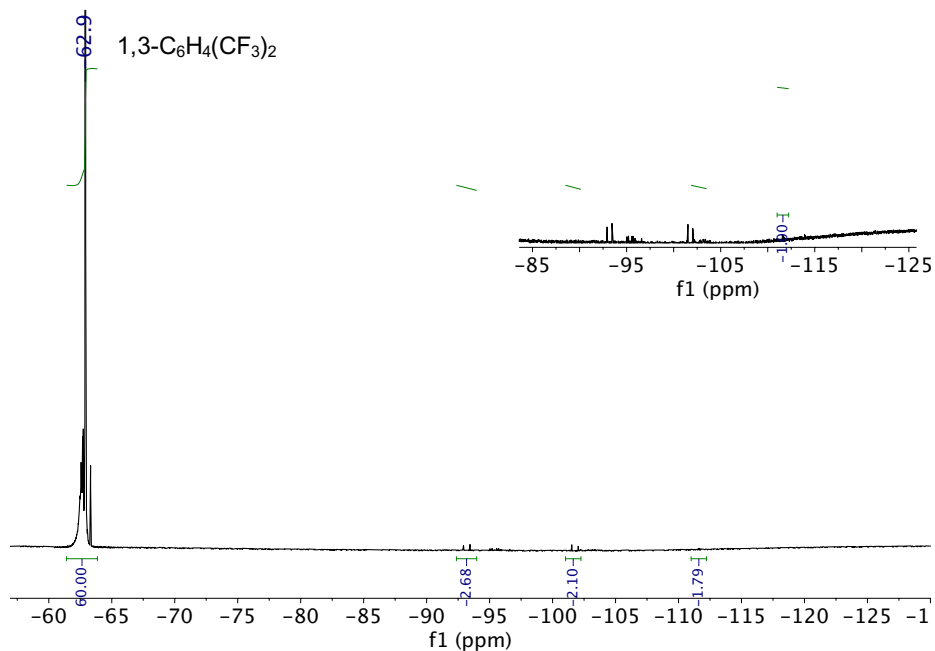

**Figure S49.** <sup>19</sup>F NMR in THF-H<sub>8</sub> **1-Ce** with 5 equiv. 1,3-bis(trifluoromethyl)benzene following 20 hours of irradiation under a 40 W Kessil A160WE Tuna Blue lamp.

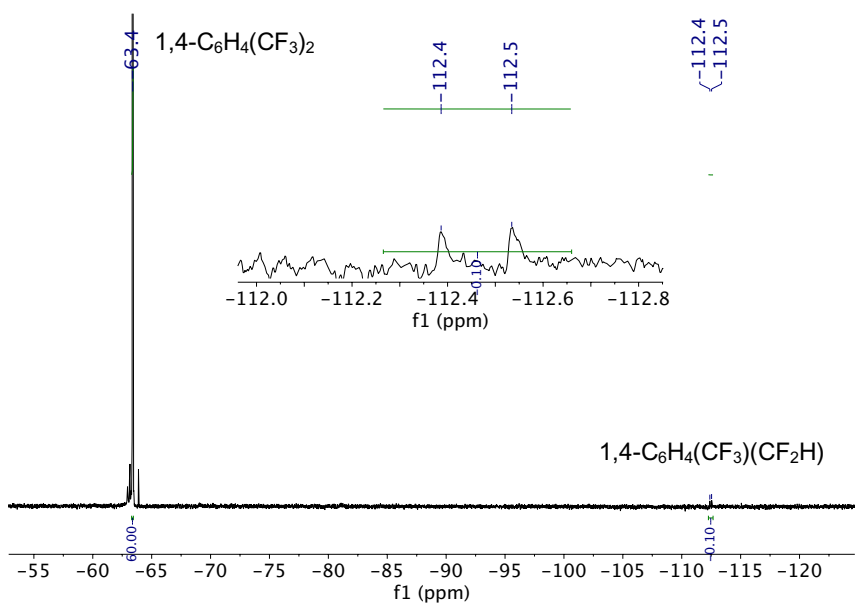

**Figure S50.** <sup>19</sup>F NMR in THF-H<sub>8</sub> **1-Ce** with 5 equiv. 1,4-bis(trifluoromethyl)benzene following 20 hours of irradiation under a 40 W Kessil A160WE Tuna Blue lamp.

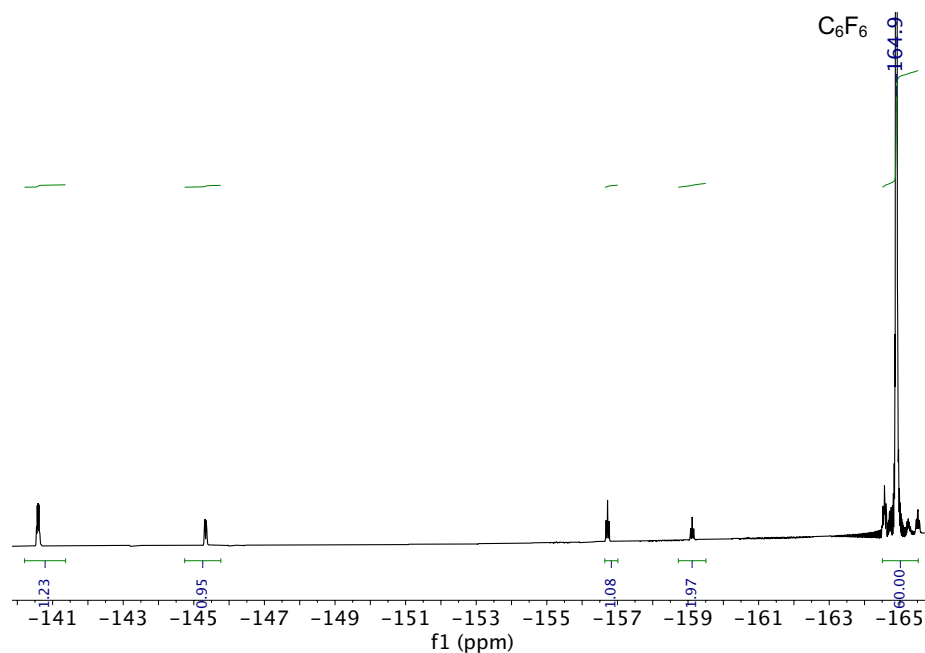

**Figure S51.**  $^{19}\text{F}$  NMR in THF- $\text{H}_8$  **1-Ce** with 5 equiv. hexafluorobenzene following 20 hours of irradiation under a 40 W Kessil A160WE Tuna Blue lamp.

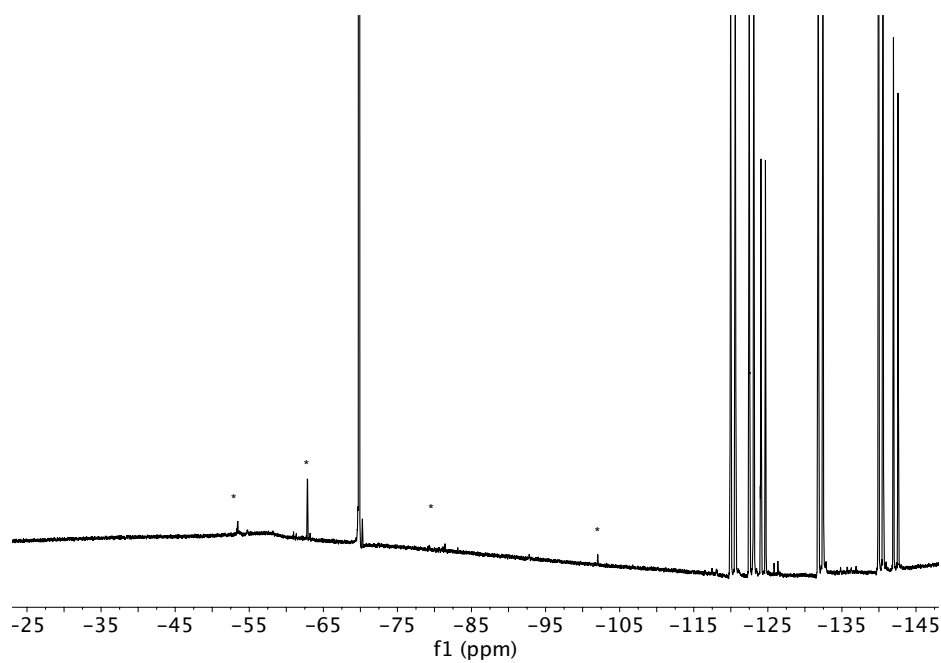

**Figure S52.**  $^{19}\text{F}$  NMR in THF- $\text{H}_8$  **1-Ce** with 5 equiv. perfluoro(methylcyclohexane) following 16 hours of irradiation under a 40 W Kessil A160WE Tuna Blue lamp, new peaks marked \*.

## **S6 Catalytic alkyl coupling**

### **S6.1 20 mol% catalytic reactions with MgBn<sub>2</sub>(THF)<sub>2</sub>**

#### **S6.1.1 General procedure and results**

In a glovebox, a vial was charged with MgBn<sub>2</sub>(THF)<sub>2</sub>, PhCF<sub>3</sub> (6.13  $\mu$ L , 0.0500 mmol, 1 equiv.) and THF (0.5 mL). The solution was then used to dissolve the catalyst (0.0100 mmol, 0.2 equiv.), and the reaction mixture transferred to a Young NMR tube. The sample was irradiated with a 40 W Kessil A160WE Tuna Blue lamp and monitored periodically by <sup>1</sup>H and <sup>19</sup>F NMR spectroscopy, with a final time point being measured after 48 hours.

**Table S3.** Defluoroalkylative coupling of PhCF<sub>3</sub> with dibenzyl magnesium mediated by metal catalysts, with yields determined by <sup>19</sup>F NMR spectroscopy.

| <b>Catalyst<br/>[20 mol%]</b> | <b>Conversion to PhCF<sub>2</sub>CH<sub>2</sub>Ph<br/>and PhCF<sub>2</sub>H after 48 hours(%)</b> | <b>PhCF<sub>2</sub>CH<sub>2</sub>Ph: PhCF<sub>2</sub>H</b> | <b>Conversion to PhCF<sub>2</sub>CH<sub>2</sub>Ph<br/>and PhCF<sub>2</sub>H (%) after (x)<br/>hours</b> |
|-------------------------------|---------------------------------------------------------------------------------------------------|------------------------------------------------------------|---------------------------------------------------------------------------------------------------------|
| <b>1-Ce</b>                   | 51                                                                                                | 2:1                                                        | 91% (80 hours)                                                                                          |
| <b>2-Ce</b>                   | 6                                                                                                 | 7:5                                                        | n/a                                                                                                     |
| <b>3-Ce</b>                   | 18                                                                                                | 7:5                                                        | 46% (80 hours)                                                                                          |
| <b>4-Ce</b>                   | 41                                                                                                | 3:1                                                        | 65% (80 hours)                                                                                          |
| <b>5-Ce</b>                   | 18                                                                                                | 5:2                                                        | n/a                                                                                                     |
| <b>6-Ce</b>                   | 33                                                                                                | 3:1                                                        | n/a                                                                                                     |
| <b>1-La</b>                   | 67                                                                                                | 9:5                                                        | 72% (60 hours)                                                                                          |
| <b>2-La</b>                   | 19                                                                                                | 1:1                                                        | n/a                                                                                                     |
| <b>1-Nd</b>                   | 32                                                                                                | 3:2                                                        | 87% (140 hours)                                                                                         |
| <b>1-Sm</b>                   | 12                                                                                                | 2:3                                                        | n/a                                                                                                     |
| <b>7-Mg</b>                   | 24                                                                                                | 6:5                                                        | 56% (80 hours)                                                                                          |
| <b>8-Mg</b>                   | 13                                                                                                | 1:1                                                        | n/a                                                                                                     |

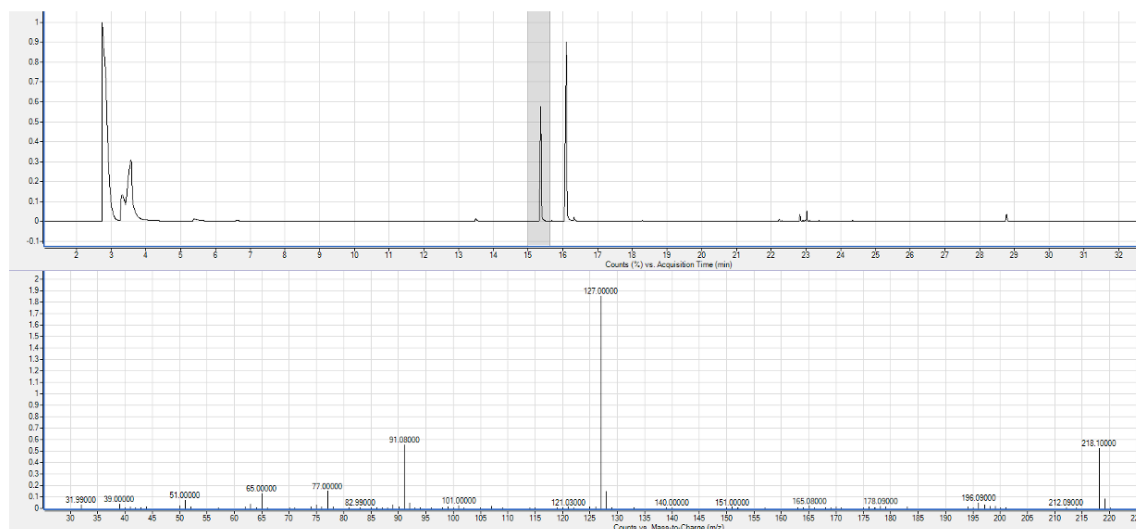

**Figure S53.** GCMS trace of the products of reaction of **1-Ce** in THF-H<sub>8</sub> with MgBn<sub>2</sub>(THF)<sub>2</sub> and PhCF<sub>3</sub> after 16 hours irradiation under a 40 W Kessil A160WE Tuna Blue lamp. m/z (PhCF<sub>2</sub><sup>-</sup>) = 127, m/z (PhCF<sub>2</sub>CH<sub>2</sub>Ph) = 218

### S6.1.2 <sup>19</sup>F NMR spectra

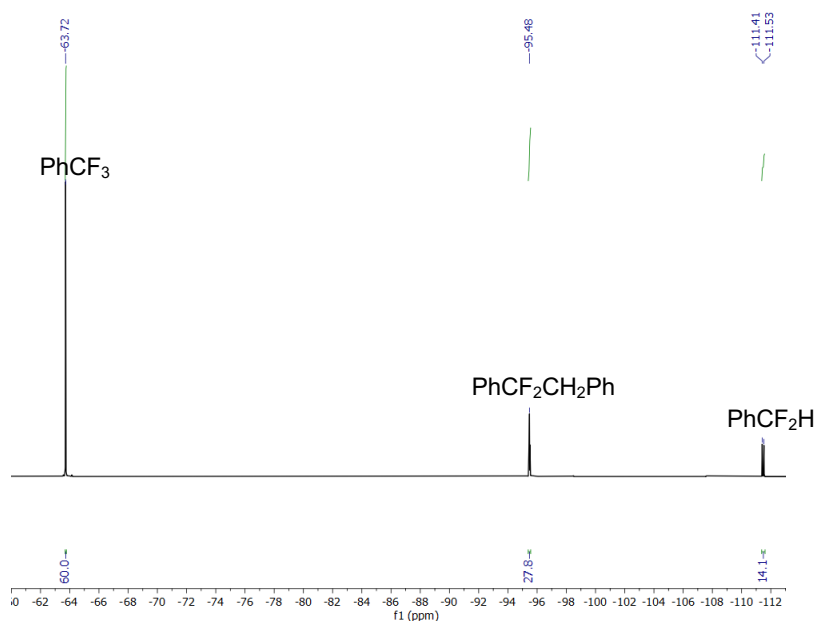

**Figure S54.** <sup>19</sup>F NMR of 20 mol% **1-Ce** in THF-H<sub>8</sub> with MgBn<sub>2</sub>(THF)<sub>2</sub> and PhCF<sub>3</sub> after 48 hours irradiation under a 40 W Kessil A160WE Tuna Blue lamp.

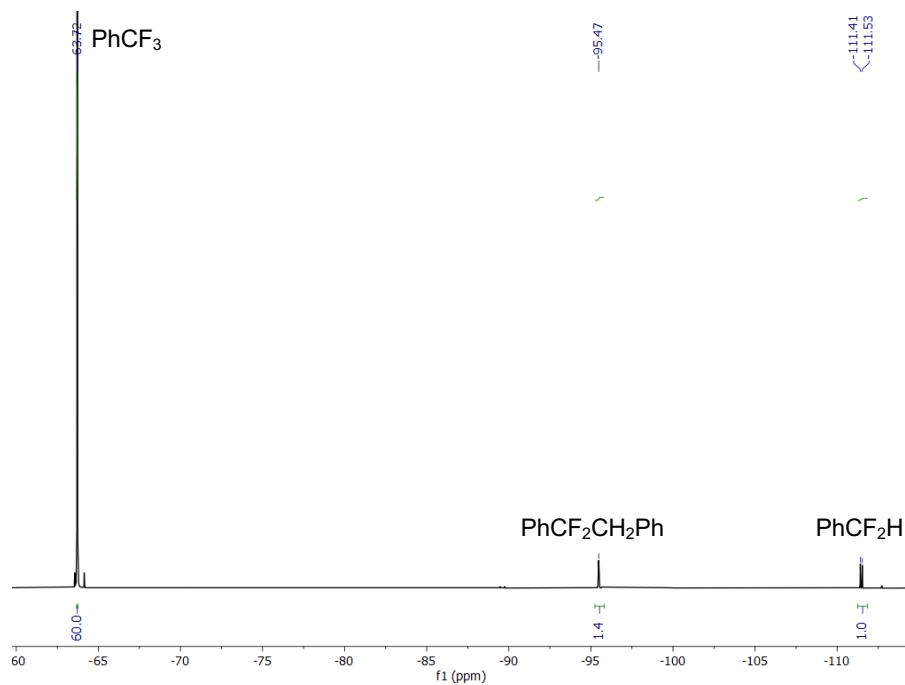

**Figure S55.**  $^{19}\text{F}$  NMR of 20 mol% **2-Ce** in THF- $\text{H}_8$  with  $\text{MgBn}_2(\text{THF})_2$  and  $\text{PhCF}_3$  after 48 hours irradiation under a 40 W Kessil A160WE Tuna Blue lamp.

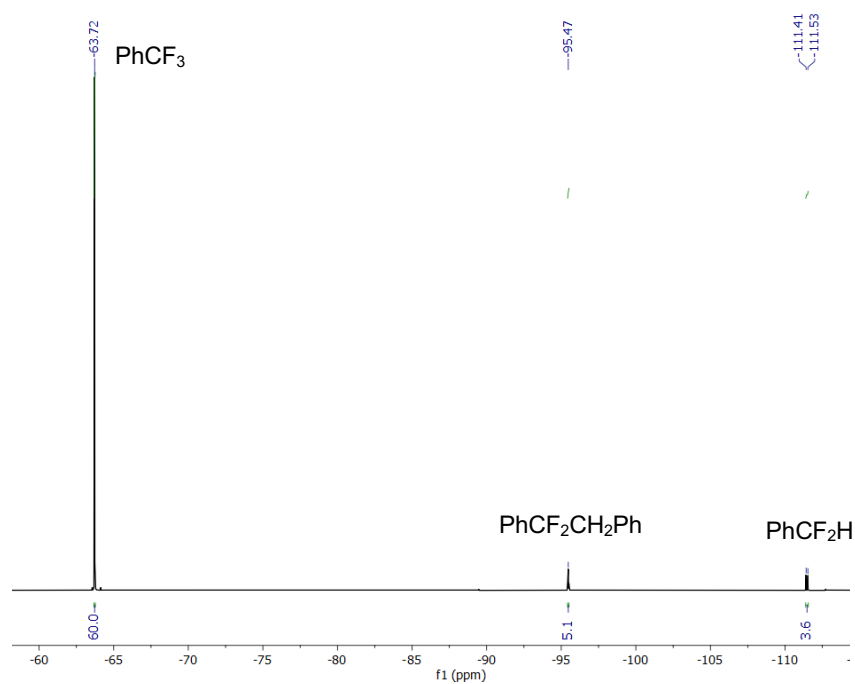

**Figure S56.**  $^{19}\text{F}$  NMR of 20 mol% **3-Ce** in THF- $\text{H}_8$  with  $\text{MgBn}_2(\text{THF})_2$  and  $\text{PhCF}_3$  after 48 hours irradiation under a 40 W Kessil A160WE Tuna Blue lamp.

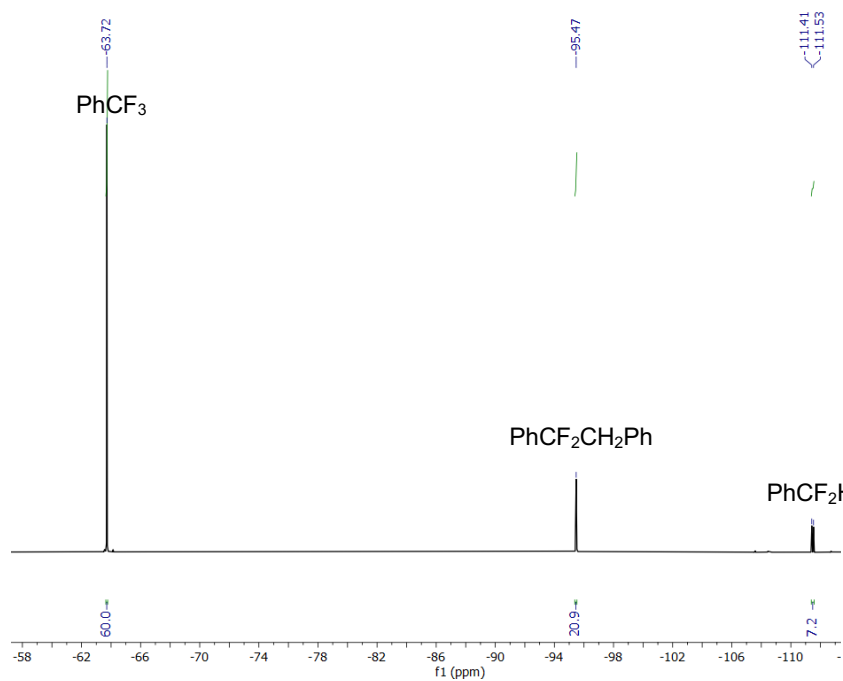

**Figure S57.**  $^{19}\text{F}$  NMR of 20 mol% **4-Ce** in  $\text{THF-H}_8$  with  $\text{MgBn}_2(\text{THF})_2$  and  $\text{PhCF}_3$  after 48 hours irradiation under a 40 W Kessil A160WE Tuna Blue lamp.

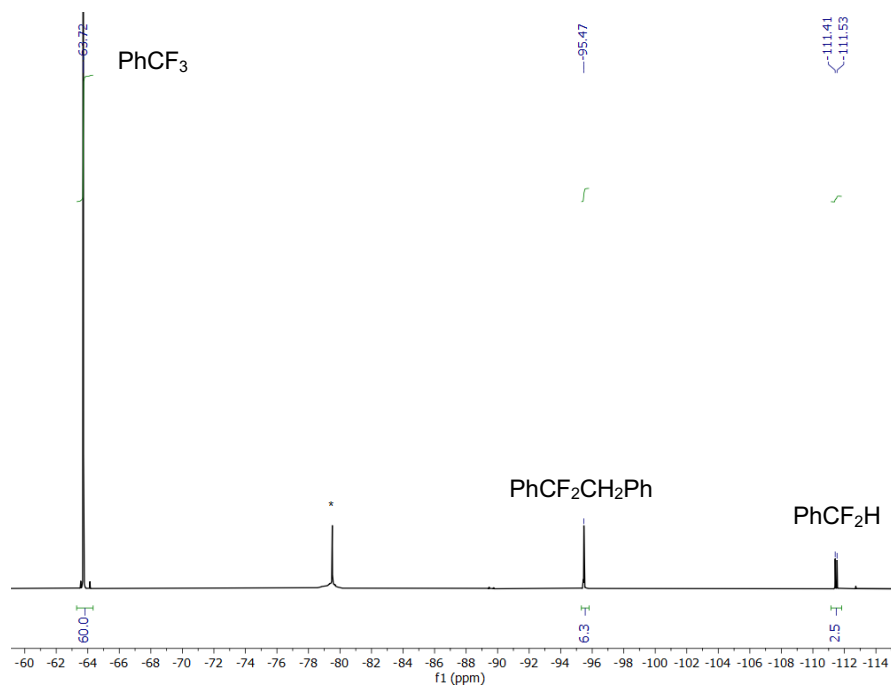

**Figure S58.**  $^{19}\text{F}$  NMR of 20 mol% **5-Ce** in  $\text{THF-H}_8$  with  $\text{MgBn}_2(\text{THF})_2$  and  $\text{PhCF}_3$  after 48 hours irradiation under a 40 W Kessil A160WE Tuna Blue lamp. Residual triflate is marked with \*.

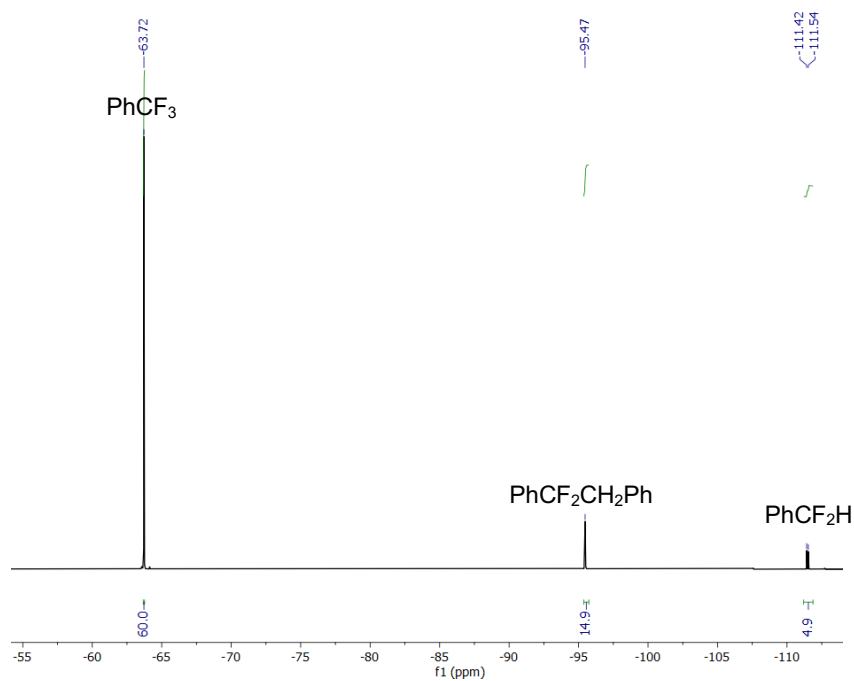

**Figure S59.**  $^{19}\text{F}$  NMR of 20 mol% **6-Ce** in  $\text{THF-H}_8$  with  $\text{MgBn}_2(\text{THF})_2$  and  $\text{PhCF}_3$  after 48 hours irradiation under a 40 W Kessil A160WE Tuna Blue lamp.

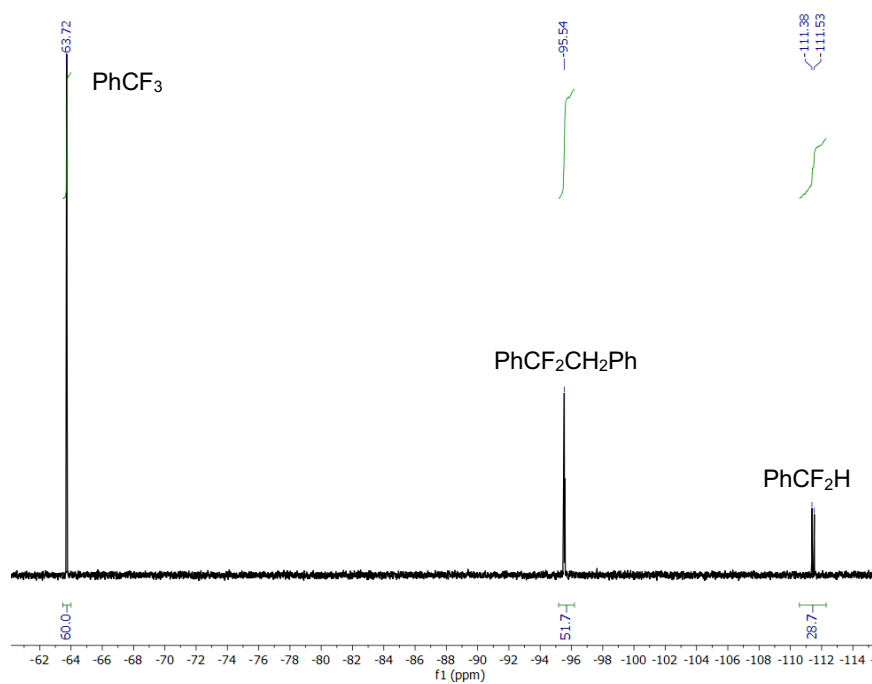

**Figure S60.**  $^{19}\text{F}$  NMR of 20 mol% **1-La** in  $\text{THF-H}_8$  with  $\text{MgBn}_2(\text{THF})_2$  and  $\text{PhCF}_3$  after 48 hours irradiation under a 40 W Kessil A160WE Tuna Blue lamp.



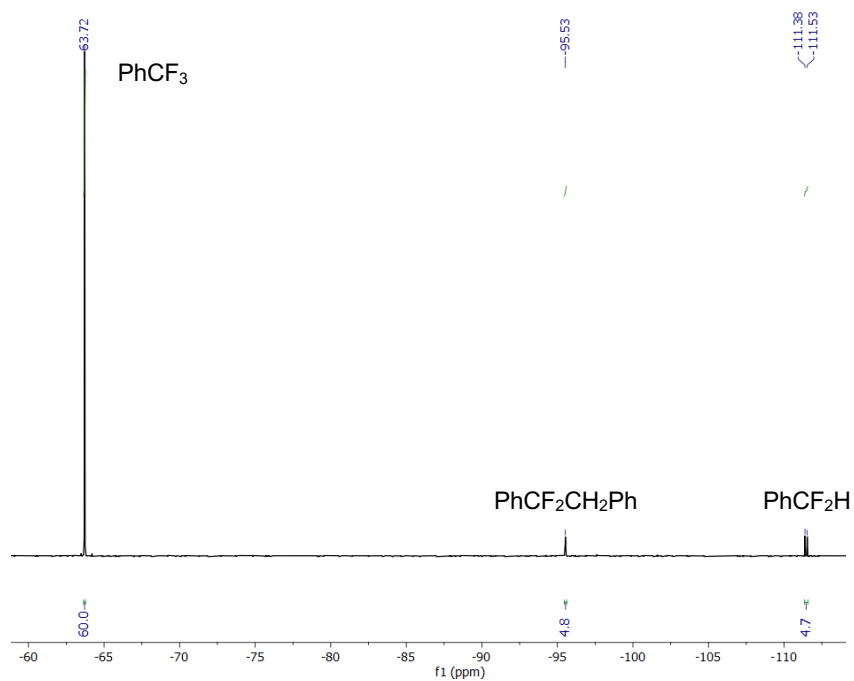

**Figure S61.**  $^{19}\text{F}$  NMR of 20 mol% **2-La** in  $\text{THF-H}_8$  with  $\text{MgBn}_2(\text{THF})_2$  and  $\text{PhCF}_3$  after 48 hours irradiation under a 40 W Kessil A160WE Tuna Blue lamp.

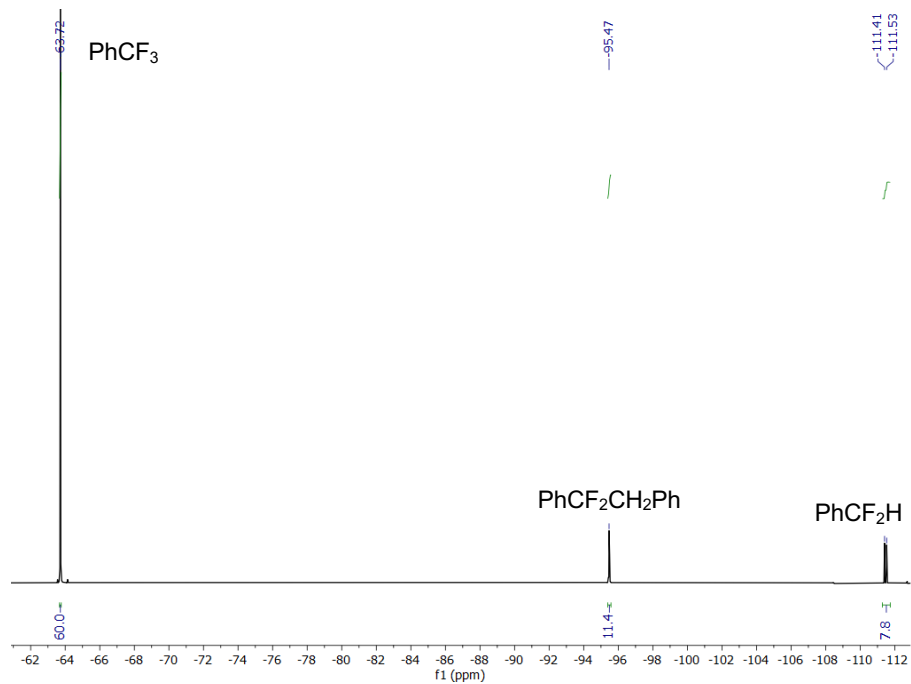

**Figure S62.**  $^{19}\text{F}$  NMR of 20 mol% **1-Nd** in  $\text{THF-H}_8$  with  $\text{MgBn}_2(\text{THF})_2$  and  $\text{PhCF}_3$  after 48 hours irradiation under a 40 W Kessil A160WE Tuna Blue lamp.

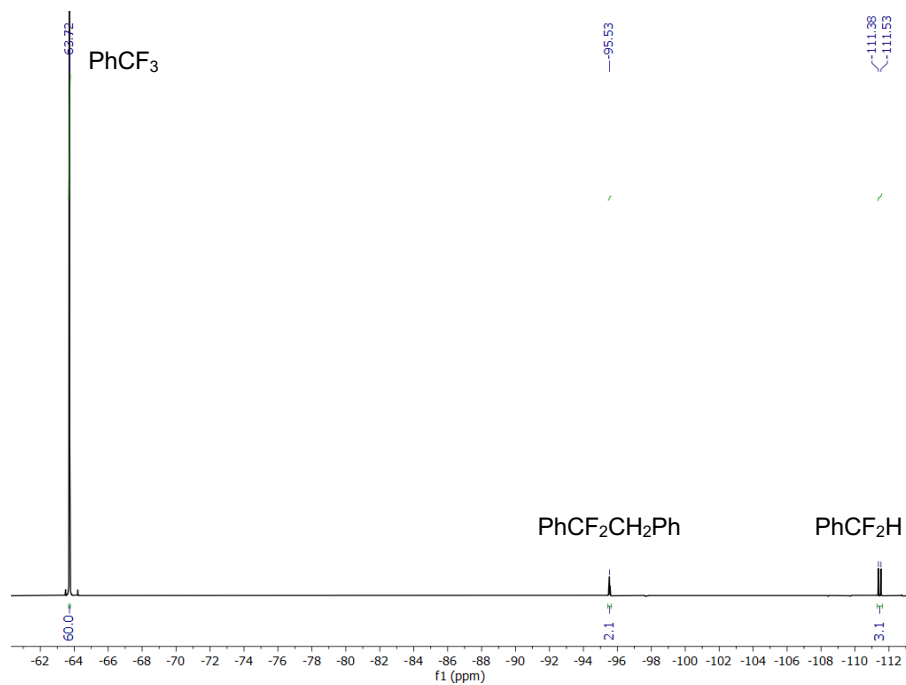

**Figure S63.**  $^{19}\text{F}$  NMR of 20 mol% **1-Sm** in  $\text{THF-H}_8$  with  $\text{MgBn}_2(\text{THF})_2$  and  $\text{PhCF}_3$  after 48 hours irradiation under a 40 W Kessil A160WE Tuna Blue lamp.

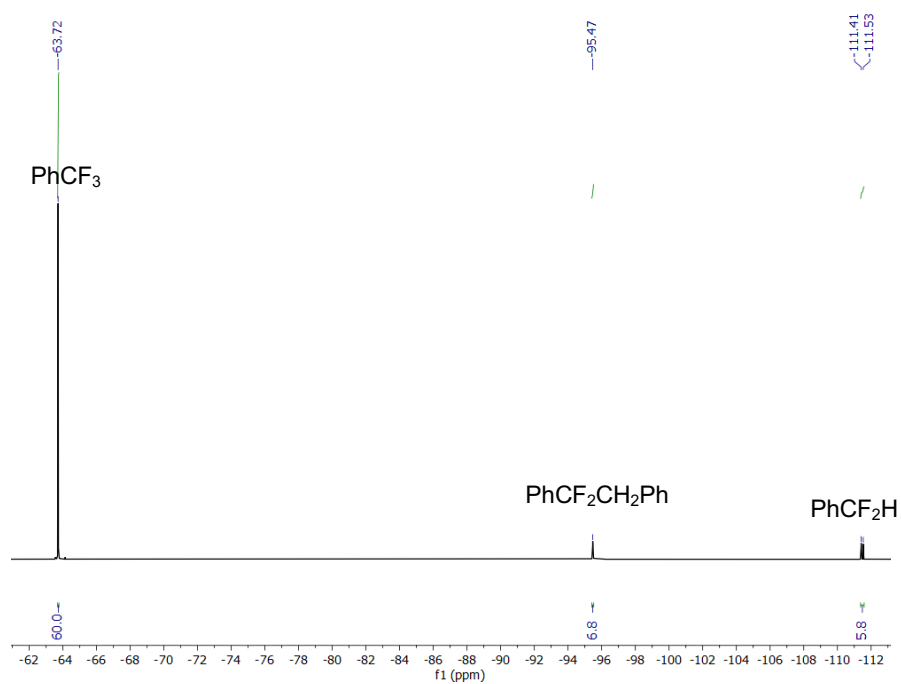

**Figure S64.**  $^{19}\text{F}$  NMR of 20 mol% **7-Mg** in  $\text{THF-H}_8$  with  $\text{MgBn}_2(\text{THF})_2$  and  $\text{PhCF}_3$  after 48 hours irradiation under a 40 W Kessil A160WE Tuna Blue lamp.

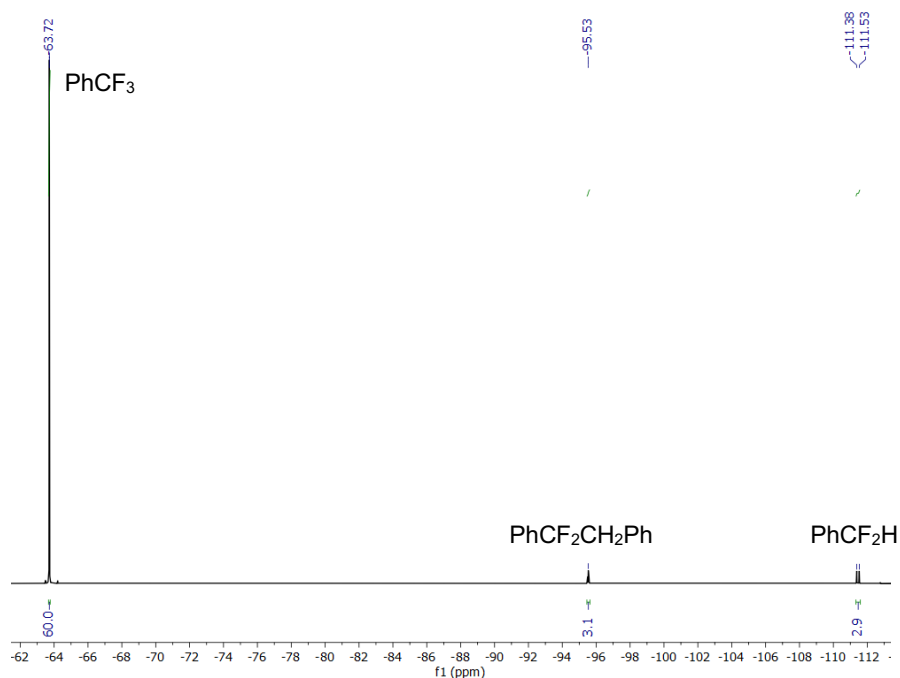

**Figure S65.**  $^{19}\text{F}$  NMR of 20 mol% **8-Mg** in THF- $\text{H}_8$  with  $\text{MgBn}_2(\text{THF})_2$  and  $\text{PhCF}_3$  after 48 hours irradiation under a 40 W Kessil A160WE Tuna Blue lamp.

**S6.2 20 mol% reactions of **1-Ce** with other metal dialkyl reagents**

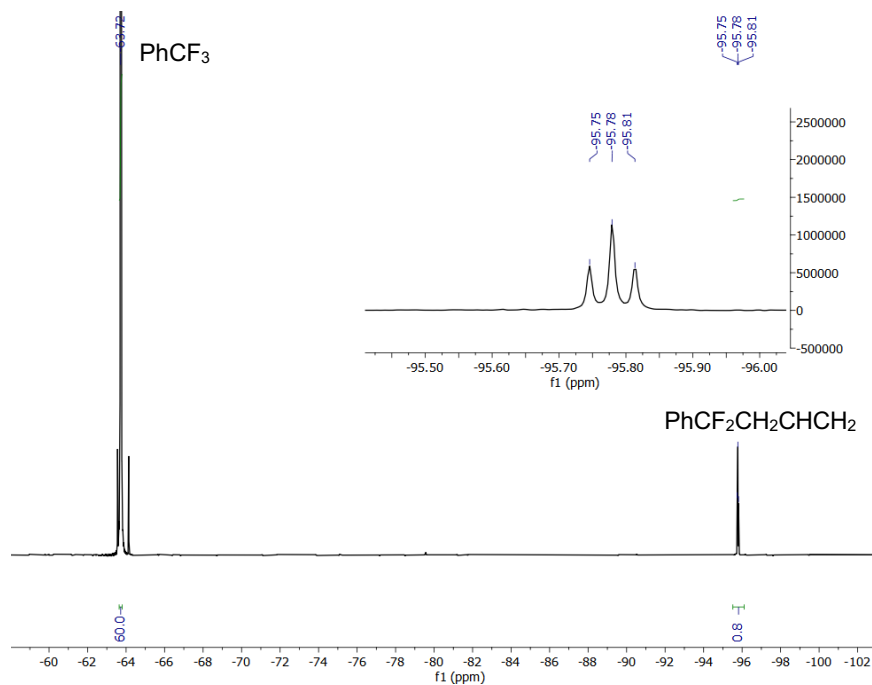

**Figure S66.**  $^{19}\text{F}$  NMR of 20 mol% **1-Ce** in THF- $\text{H}_8$  with 1 equiv.  $\text{Mg}(\text{allyl})_2(\text{THF})_2$  and 5 equiv.  $\text{PhCF}_3$  after 18 hours irradiation under a 40 W Kessil A160WE Tuna Blue lamp at room temperature.

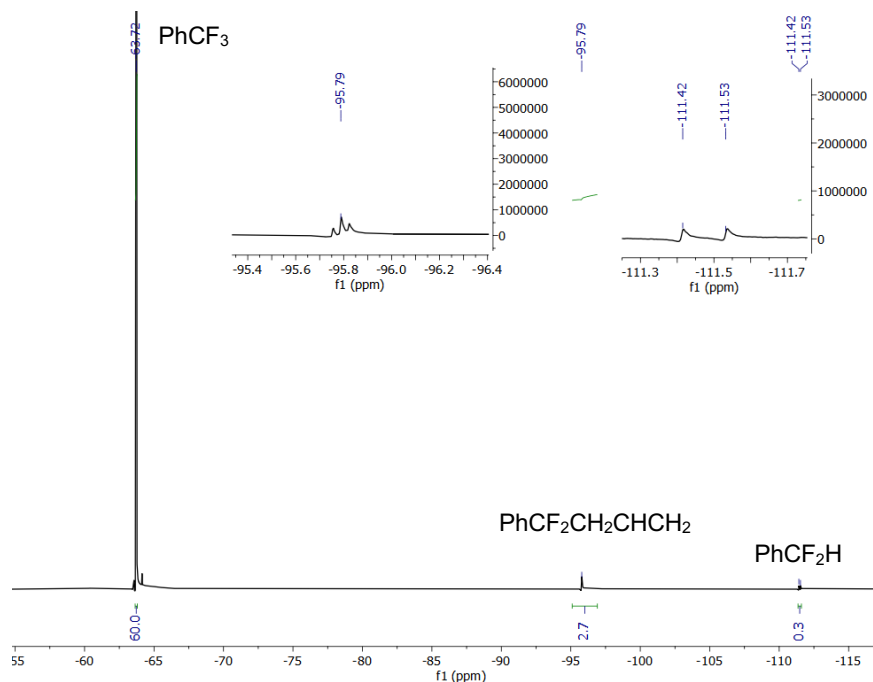

**Figure S67.**  $^{19}\text{F}$  NMR of 20 mol% **1-Ce** in  $\text{THF-H}_8$  with 1 equiv.  $\text{Bu}_3\text{Sn(allyl)}$  and 5 equiv.  $\text{PhCF}_3$  after 48 hours irradiation under a 40 W Kessil A160WE Tuna Blue lamp at  $70^\circ\text{C}$ .

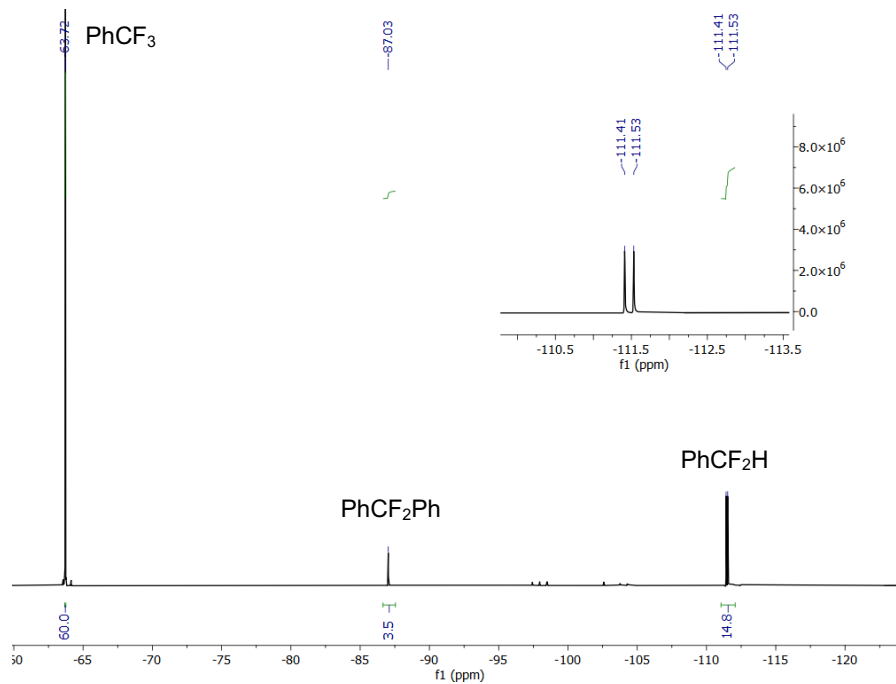

**Figure S68.**  $^{19}\text{F}$  NMR of 20 mol% **1-Ce** in  $\text{THF-H}_8$  with 1 equiv.  $\text{Mg(phenyl)}_2(\text{THF})_2$  and 5 equiv.  $\text{PhCF}_3$  after 48 hours irradiation under a 40 W Kessil A160WE Tuna Blue lamp at  $70^\circ\text{C}$ .

### S6.3. 1 mol% catalytic reactions with **1-Ce**, **1-La**, **1-Nd**, **1-Sm** and **7-Mg**

#### S6.3.1 General procedure and results

In a glovebox, a vial was charged with  $\text{MgBn}_2(\text{THF})_2$  in THF (0.5 mL) and  $\text{PhCF}_3$  (6.13  $\mu\text{L}$ , 0.0500 mmol, 1 equiv.). The solution was then used to dissolve the catalyst, and the reaction mixture transferred to a Young NMR tube with a capillary containing 1,2-difluorobenzene as internal standard. The sample was irradiated with a 40 W Kessil A160WE Tuna Blue lamp and monitored periodically by  $^1\text{H}$  and  $^{19}\text{F}$  NMR spectroscopy every 21 hours.

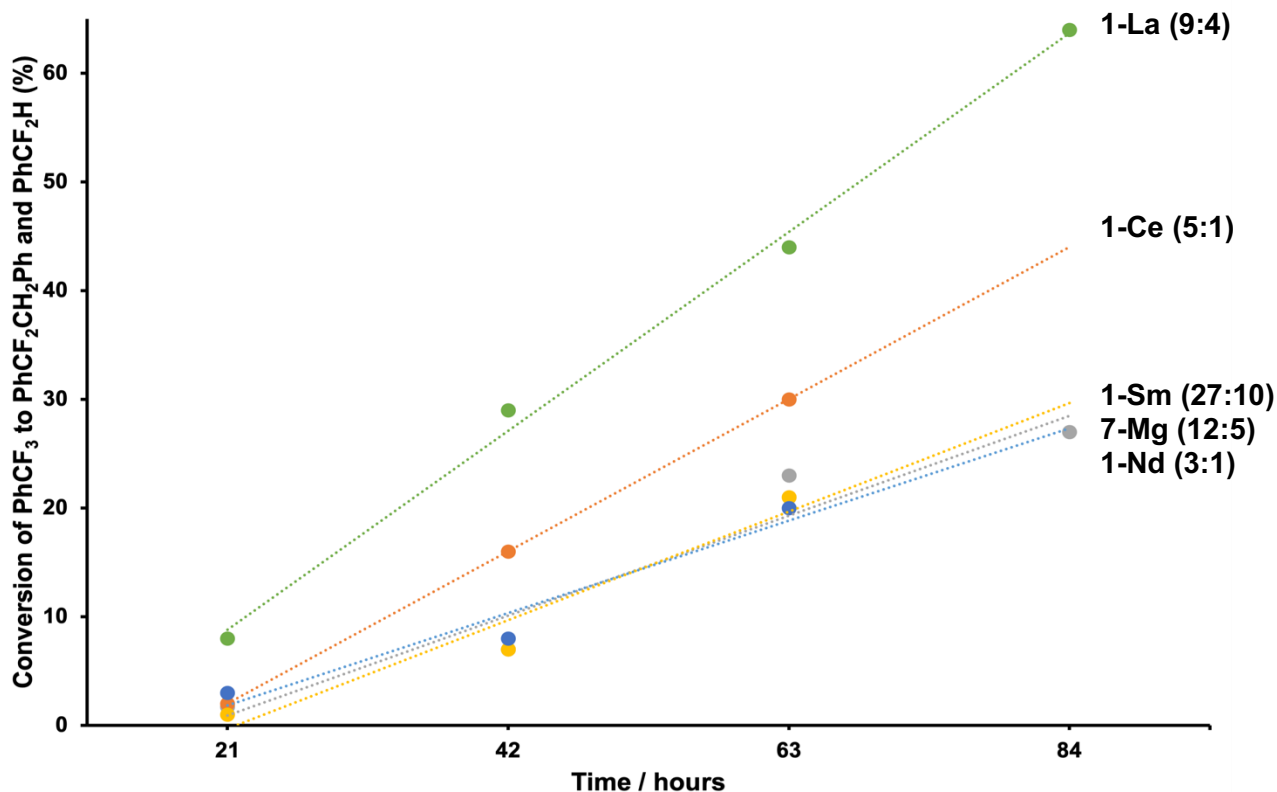

**Figure S69.** Graph of the conversion of  $\text{PhCF}_3$  to  $\text{PhCF}_2\text{CH}_2\text{Ph}$  and  $\text{PhCF}_2\text{H}$  mediated by 1 mol% loading of **1-La**, **1-Ce**, **1-Nd**, **1-Sm** and **7-Mg**, with 1 equiv.  $\text{PhCF}_3$  and 1 equiv.  $\text{MgBn}_2(\text{THF})_2$  after irradiation under a 40 W Kessil A160WE Tuna Blue lamp at room temperature.  $\text{PhCF}_2\text{CH}_2\text{Ph}:\text{PhCF}_2\text{H}$  product ratio after 63 hours irradiation written in parentheses after complex label.

### S6.3.2 $^{19}\text{F}$ NMR spectra

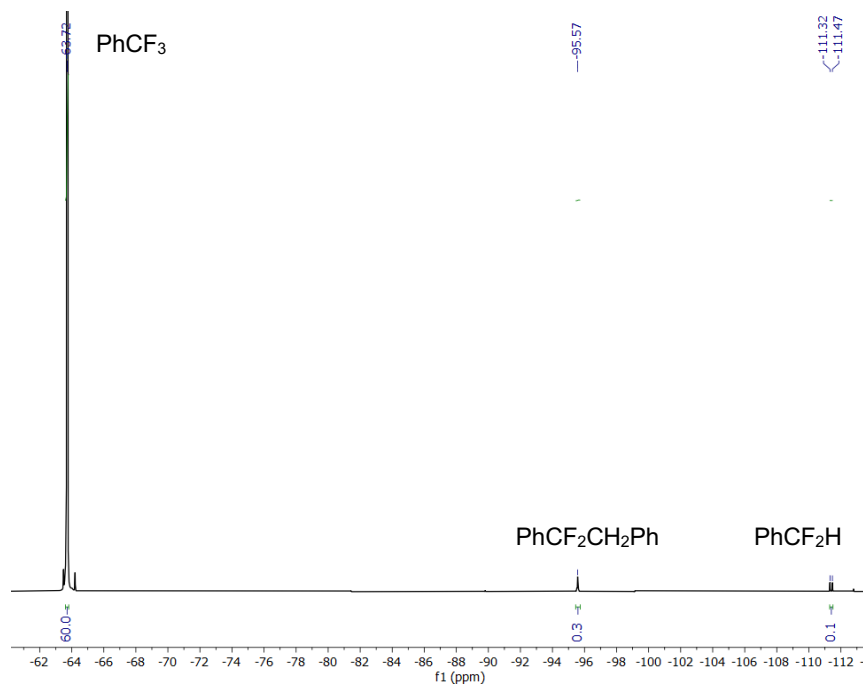

**Figure S70.**  $^{19}\text{F}$  NMR of 1 mol% **1-Ce** in THF- $\text{H}_8$  with  $\text{MgBn}_2(\text{THF})_2$  and  $\text{PhCF}_3$  after 21 hours irradiation under a 40 W Kessil A160WE Tuna Blue lamp.

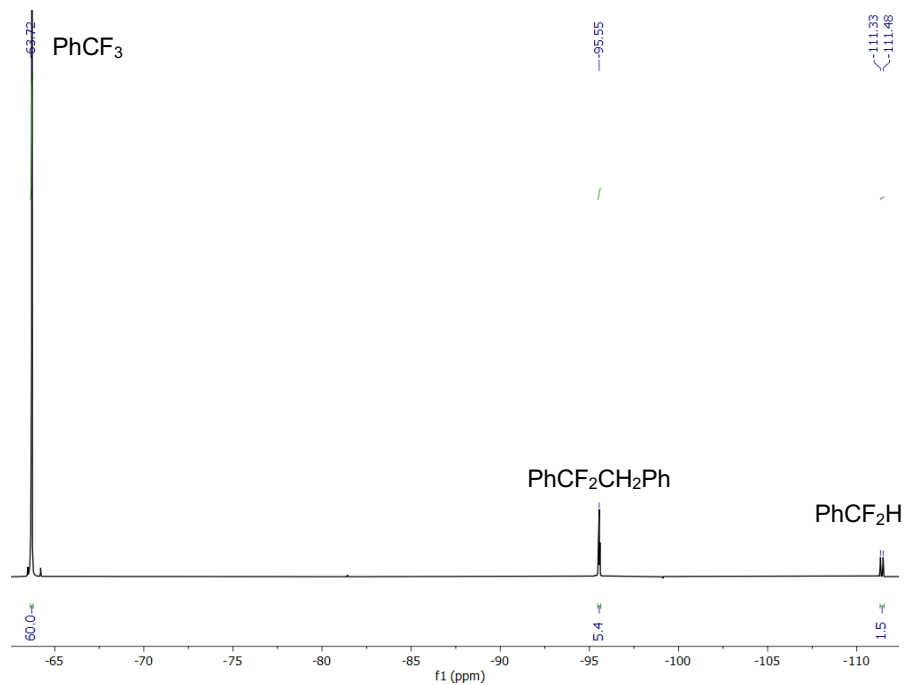

**Figure S71.**  $^{19}\text{F}$  NMR of 1 mol% **1-Ce** in THF- $\text{H}_8$  with  $\text{MgBn}_2(\text{THF})_2$  and  $\text{PhCF}_3$  after 42 hours irradiation under a 40 W Kessil A160WE Tuna Blue lamp.

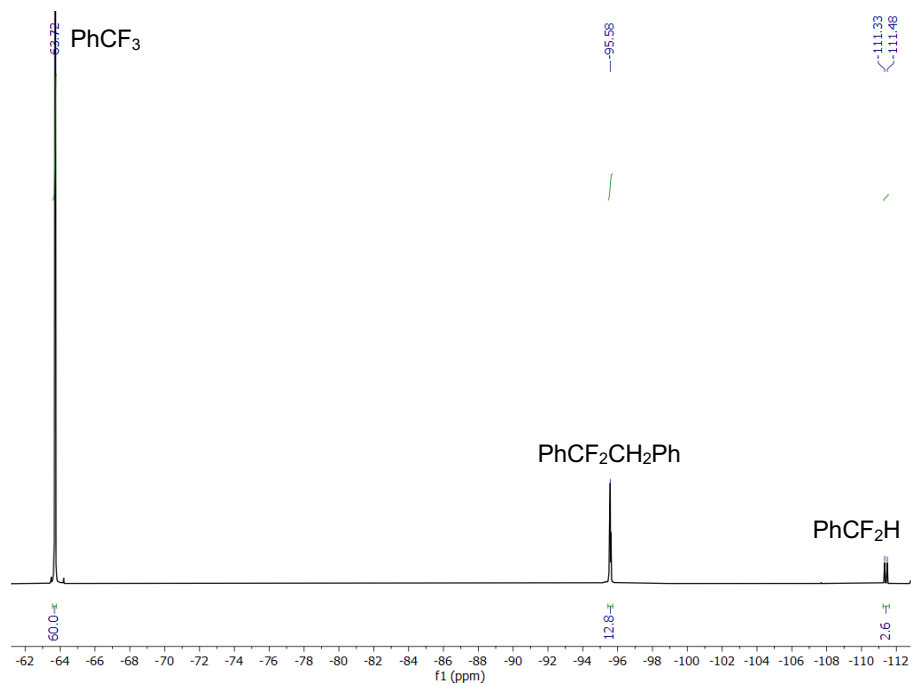

**Figure S72.**  $^{19}\text{F}$  NMR of 1 mol% **1-Ce** in THF- $\text{H}_8$  with  $\text{MgBn}_2(\text{THF})_2$  and  $\text{PhCF}_3$  after 63 hours irradiation under a 40 W Kessil A160WE Tuna Blue lamp.

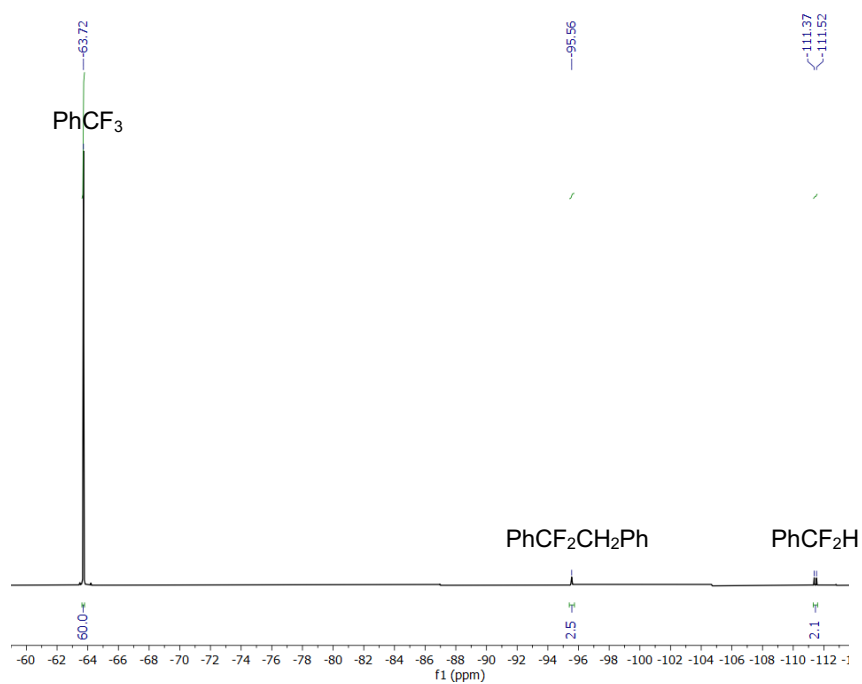

**Figure S73.**  $^{19}\text{F}$  NMR of 1 mol% **1-La** in THF- $\text{H}_8$  with  $\text{MgBn}_2(\text{THF})_2$  and  $\text{PhCF}_3$  after 21 hours irradiation under a 40 W Kessil A160WE Tuna Blue lamp.

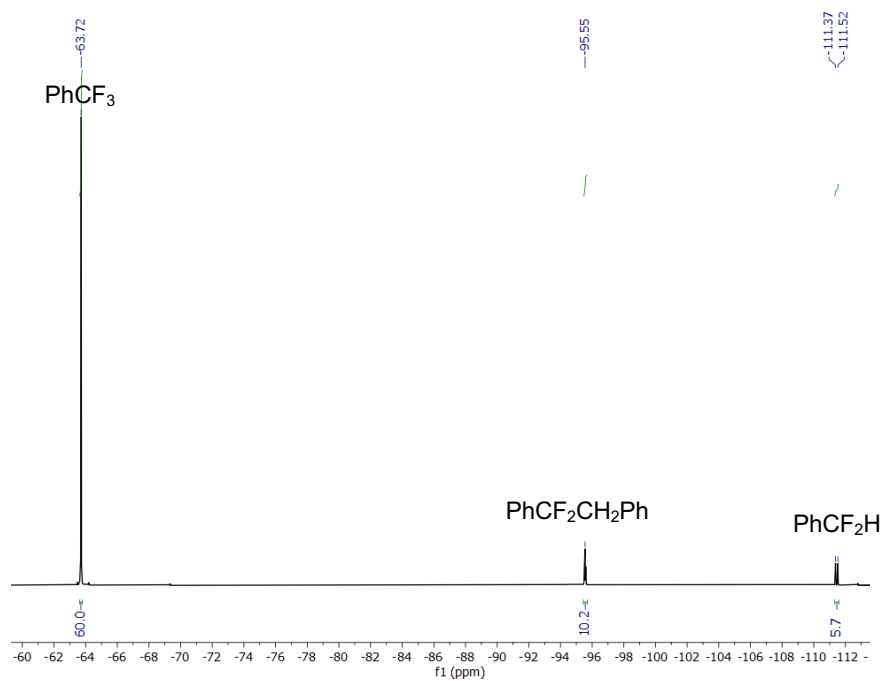

**Figure S74.**  $^{19}\text{F}$  NMR of 1 mol% **1-La** in  $\text{THF-H}_8$  with  $\text{MgBn}_2(\text{THF})_2$  and  $\text{PhCF}_3$  after 42 hours irradiation under a 40 W Kessil A160WE Tuna Blue lamp.

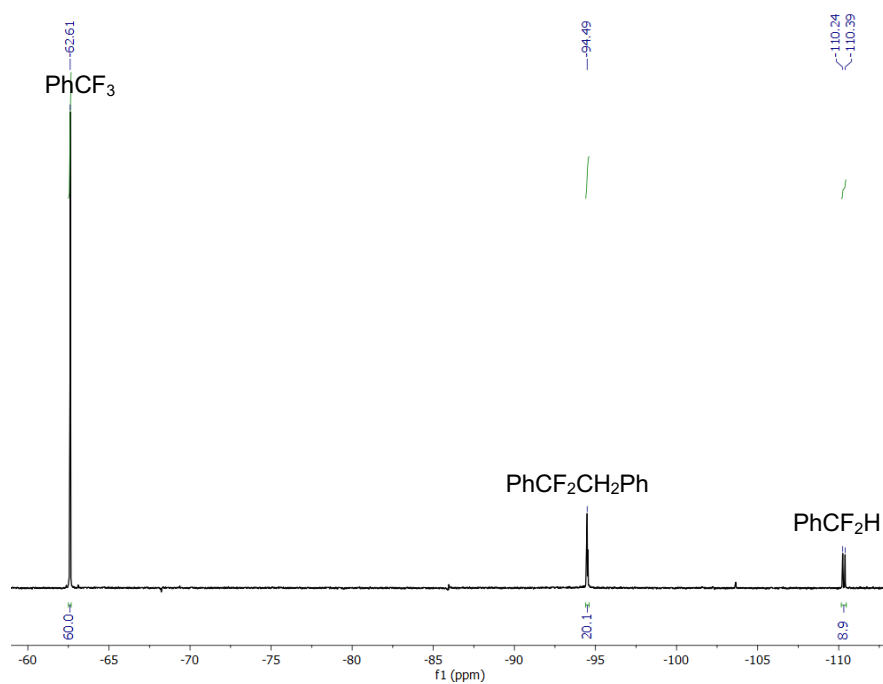

**Figure S75.**  $^{19}\text{F}$  NMR of 1 mol% **1-La** in  $\text{THF-H}_8$  with  $\text{MgBn}_2(\text{THF})_2$  and  $\text{PhCF}_3$  after 63 hours irradiation under a 40 W Kessil A160WE Tuna Blue lamp.



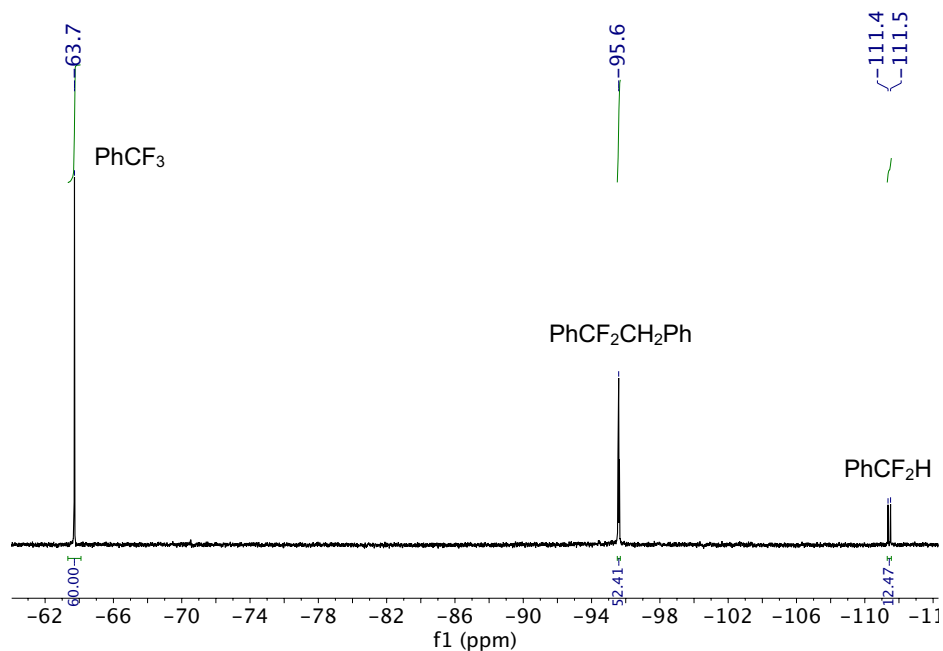

**Figure S76.**  $^{19}\text{F}$  NMR of 1 mol% **1-La** in THF- $\text{H}_8$  with  $\text{MgBn}_2(\text{THF})_2$  and  $\text{PhCF}_3$  after 84 hours irradiation under a 40 W Kessil A160WE Tuna Blue lamp.

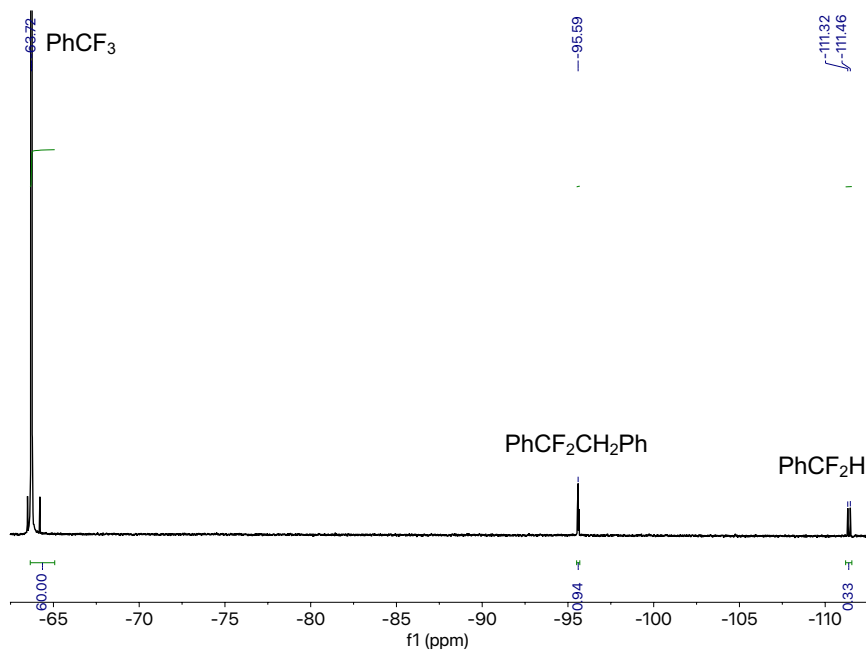

**Figure S77.**  $^{19}\text{F}$  NMR of 1 mol% **1-Nd** in THF- $\text{H}_8$  with  $\text{MgBn}_2(\text{THF})_2$  and  $\text{PhCF}_3$  after 21 hours irradiation under a 40 W Kessil A160WE Tuna Blue lamp.

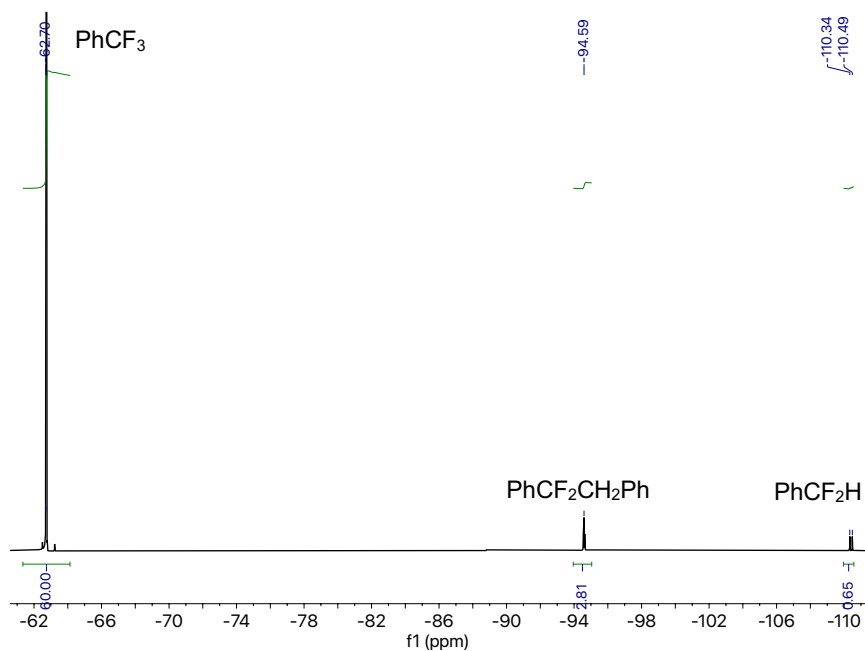

**Figure S78.**  $^{19}\text{F}$  NMR of 1 mol% **1-Nd** in THF- $\text{H}_8$  with  $\text{MgBn}_2(\text{THF})_2$  and  $\text{PhCF}_3$  after 42 hours irradiation under a 40 W Kessil A160WE Tuna Blue lamp.

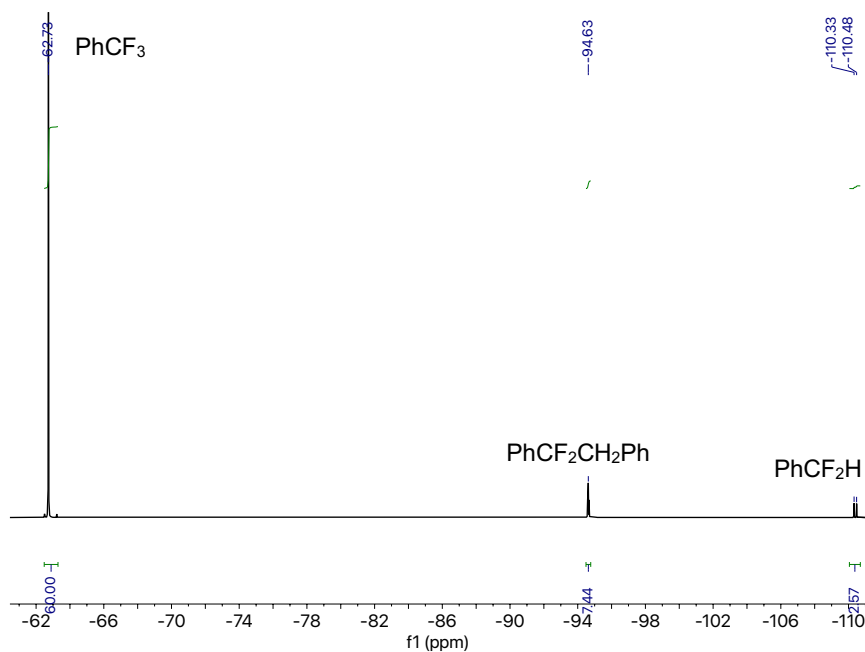

**Figure S79.**  $^{19}\text{F}$  NMR of 1 mol% **1-Nd** in THF- $\text{H}_8$  with  $\text{MgBn}_2(\text{THF})_2$  and  $\text{PhCF}_3$  after 63 hours irradiation under a 40 W Kessil A160WE Tuna Blue lamp.

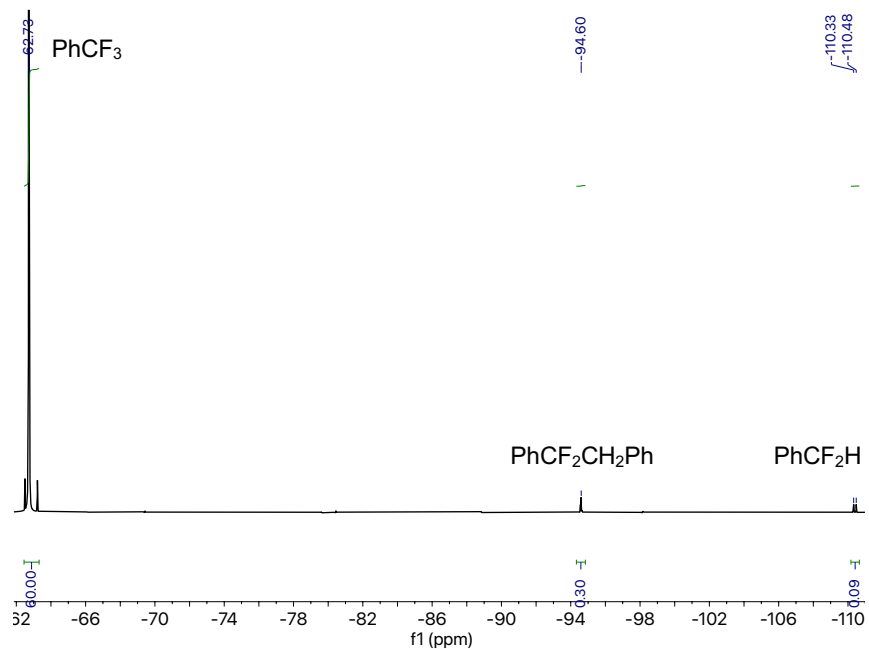

**Figure S80.**  $^{19}\text{F}$  NMR of 1 mol% **1-Sm** in THF- $\text{H}_8$  with  $\text{MgBn}_2(\text{THF})_2$  and  $\text{PhCF}_3$  after 21 hours irradiation under a 40 W Kessil A160WE Tuna Blue lamp.

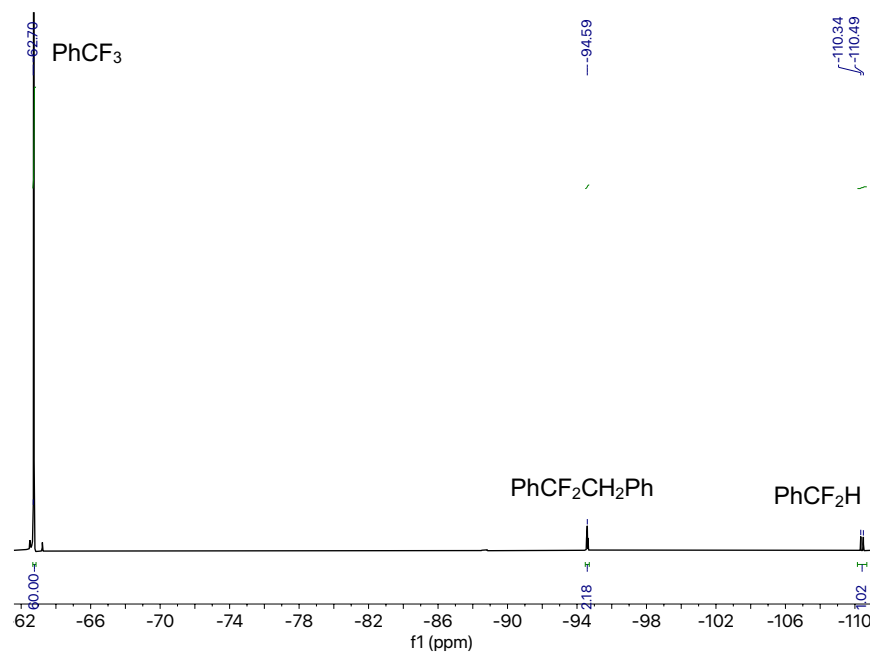

**Figure S81.**  $^{19}\text{F}$  NMR of 1 mol% **1-Sm** in THF- $\text{H}_8$  with  $\text{MgBn}_2(\text{THF})_2$  and  $\text{PhCF}_3$  after 42 hours irradiation under a 40 W Kessil A160WE Tuna Blue lamp.

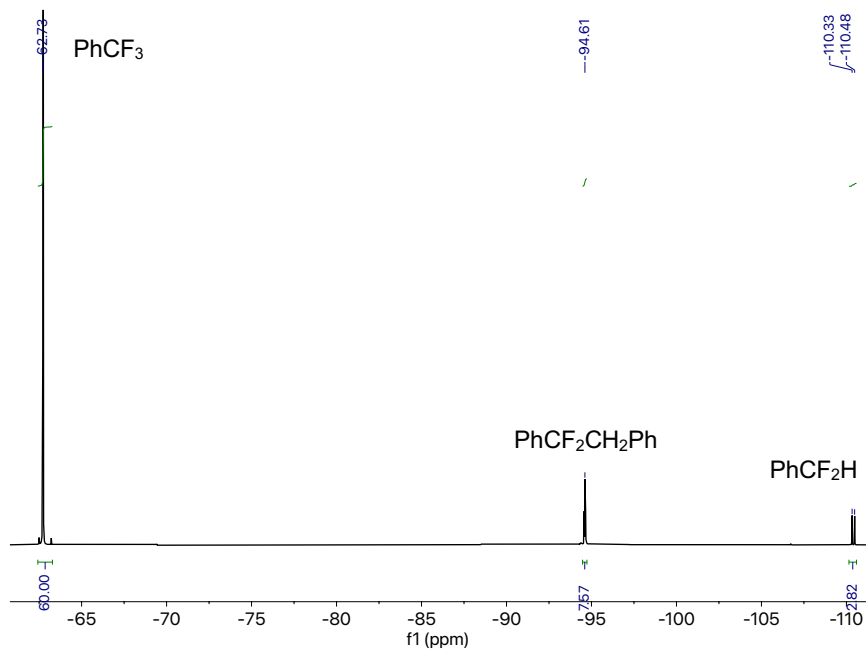

**Figure S82.**  $^{19}\text{F}$  NMR of 1 mol% **1-Sm** in THF- $\text{H}_8$  with  $\text{MgBn}_2(\text{THF})_2$  and  $\text{PhCF}_3$  after 63 hours irradiation under a 40 W Kessil A160WE Tuna Blue lamp.

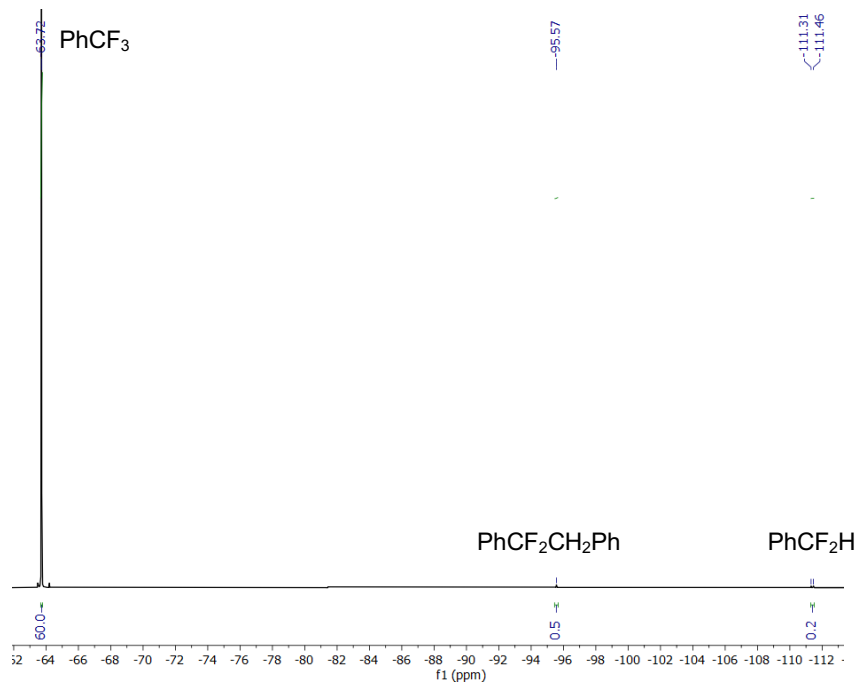

**Figure S83.**  $^{19}\text{F}$  NMR of 1 mol% **7-Mg** in THF- $\text{H}_8$  with  $\text{MgBn}_2(\text{THF})_2$  and  $\text{PhCF}_3$  after 21 hours irradiation under a 40 W Kessil A160WE Tuna Blue lamp.

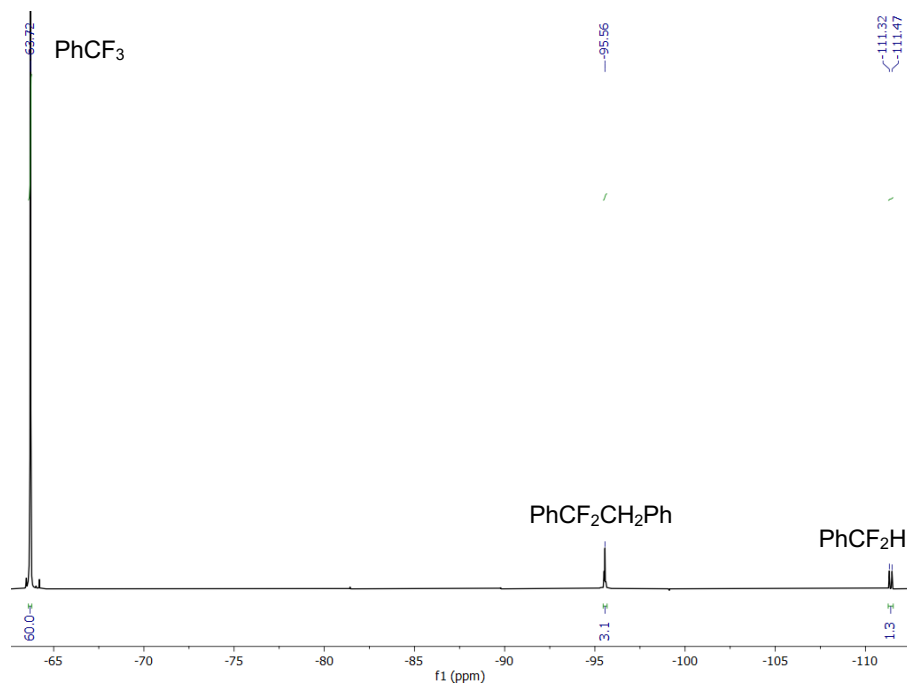

**Figure S84.**  $^{19}\text{F}$  NMR of 1 mol% **7-Mg** in THF- $\text{H}_8$  with  $\text{MgBn}_2(\text{THF})_2$  and  $\text{PhCF}_3$  after 42 hours irradiation under a 40 W Kessil A160WE Tuna Blue lamp.

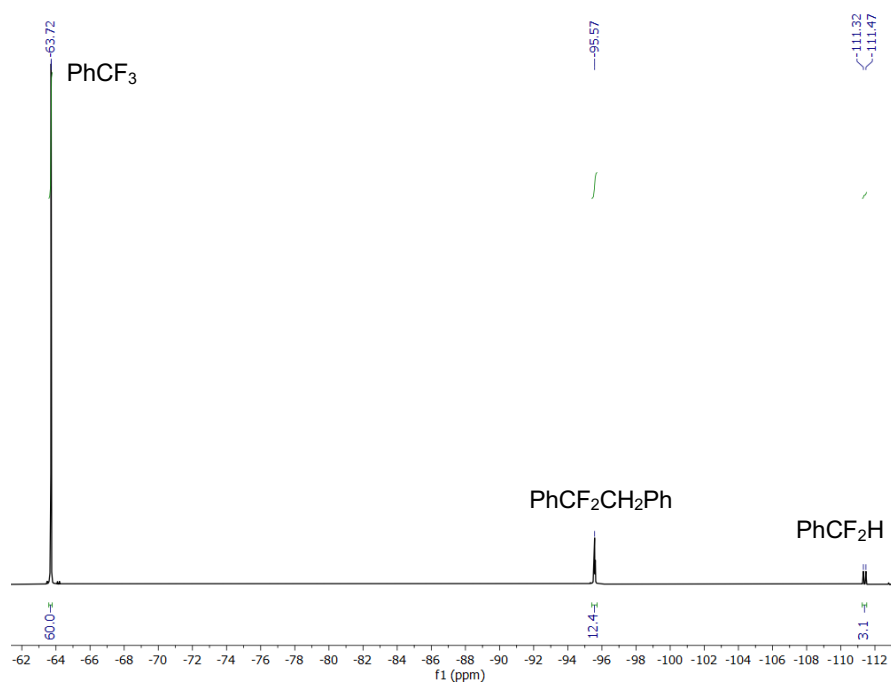

**Figure S85.**  $^{19}\text{F}$  NMR of 1 mol% **7-Mg** in THF- $\text{H}_8$  with  $\text{MgBn}_2(\text{THF})_2$  and  $\text{PhCF}_3$  after 84 hours irradiation under a 40 W Kessil A160WE Tuna Blue lamp.

## S6.4 1 mol% catalytic reactions with **1-Ce**, **1-La** and **7-Mg** in THF-D<sub>8</sub>

### S6.4.1 General procedure and results

In a glovebox, a vial was charged with MgBn<sub>2</sub>(THF)<sub>2</sub> in THF-D<sub>8</sub> (0.5 mL) and PhCF<sub>3</sub> (6.13 μL, 0.0500 mmol, 1 equiv.). The solution was then used to dissolve the catalyst, and the reaction mixture transferred to a Young NMR tube with a capillary containing 1,2-difluorobenzene. The sample was irradiated with a 40 W Kessil A160WE Tuna Blue lamp and monitored by <sup>1</sup>H and <sup>19</sup>F NMR spectroscopy after 42 hours.

**Table S4.** Defluoroalkylative coupling of PhCF<sub>3</sub> with dibenzyl magnesium mediated by 1 mol% catalyst loading of **1-Ce**, **1-La** and **7-Mg** in THF-D<sub>8</sub> followed by 42 hours irradiation, with yields determined by <sup>19</sup>F NMR spectroscopy.

| Catalyst [1 mol%] | Conversion of PhCF <sub>3</sub> to PhCF <sub>2</sub> CH <sub>2</sub> Ph and PhCF <sub>2</sub> H (%) | PhCF <sub>2</sub> CH <sub>2</sub> Ph: PhCF <sub>2</sub> H ratio |
|-------------------|-----------------------------------------------------------------------------------------------------|-----------------------------------------------------------------|
| <b>1-Ce</b>       | 13                                                                                                  | 11:1                                                            |
| <b>1-La</b>       | 16                                                                                                  | 11:1                                                            |
| <b>7-Mg</b>       | 10                                                                                                  | 8:1                                                             |

### S6.4.2 $^{19}\text{F}$ NMR spectra

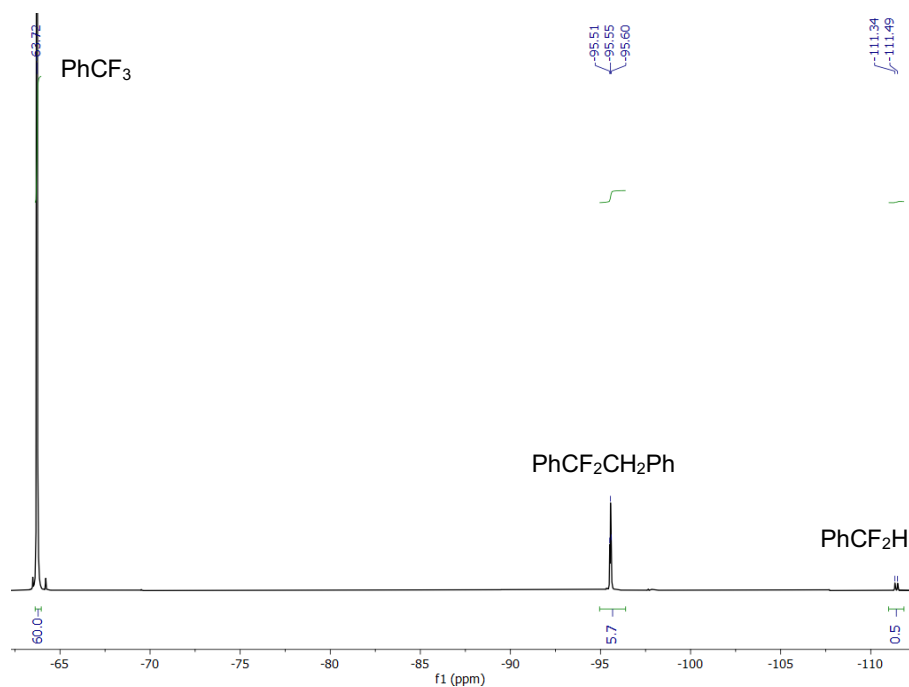

**Figure S86.**  $^{19}\text{F}$  NMR of 1 mol% **1-Ce** in THF- $\text{D}_8$  with  $\text{MgBn}_2(\text{THF})_2$  and  $\text{PhCF}_3$  after 42 hours irradiation under a 40 W Kessil A160WE Tuna Blue lamp.

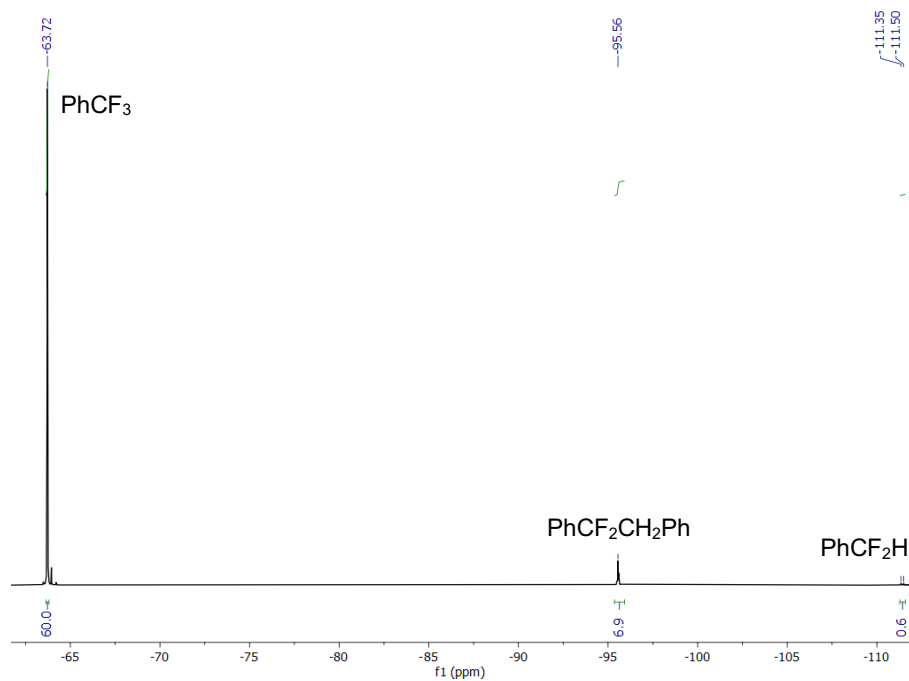

**Figure S87.**  $^{19}\text{F}$  NMR of 1 mol% **1-La** in THF- $\text{D}_8$  with  $\text{MgBn}_2(\text{THF})_2$  and  $\text{PhCF}_3$  after 42 hours irradiation under a 40 W Kessil A160WE Tuna Blue lamp.

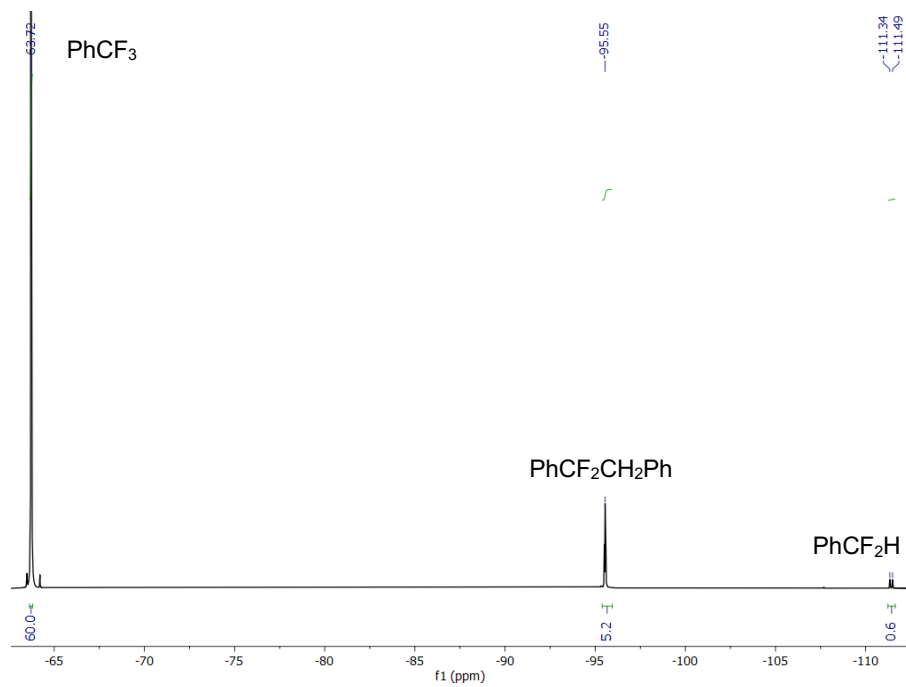

**Figure S88.**  $^{19}\text{F}$  NMR of 1 mol% **7-Mg** in THF- $\text{D}_8$  with  $\text{MgBn}_2(\text{THF})_2$  and  $\text{PhCF}_3$  after 42 hours irradiation under a 40 W Kessil A160WE Tuna Blue lamp.



## **S7 Stoichiometric alkene coupling**

### **S7.1. Preliminary reactions**

#### **S7.1.1 General procedure and results**

In a glovebox, a Young NMR tube was charged with catalyst (0.0100 mmol, 1 equiv.) and THF (0.5 mL). Alkene (0.0100 mmol, 1 equiv.) was then added using a micropipette. The sample was then irradiated with 40 W Kessil A160WE Tuna Blue lamp and monitored periodically by  $^1\text{H}$  and  $^{19}\text{F}$  NMR spectroscopy, with a final time point being taken after 100 hours irradiation.

**Table S5.** Defluoroalkylative coupling of  $\text{PhCF}_3$  with alkenes mediated by **1-Ln**, with yields determined by  $^{19}\text{F}$  NMR spectroscopy.

| <b>Entry</b> | <b>Complex</b> | <b>Alkene R Identity</b>  | <b>Yield of alkylated product (%)</b> | <b>Yield of <math>\text{PhCF}_2\text{H}</math> byproduct (%)</b> |
|--------------|----------------|---------------------------|---------------------------------------|------------------------------------------------------------------|
| <b>1</b>     | <b>1-Ce</b>    | $^t\text{Bu}$             | 13                                    | 8                                                                |
| <b>2</b>     | <b>1-Ce</b>    | $\text{SiMe}_3$           | 27                                    | 6                                                                |
| <b>3</b>     | <b>1-La</b>    | $\text{SiMe}_3$           | 1                                     | Not detected                                                     |
| <b>4</b>     | <b>1-Ce</b>    | $\text{Si}(\text{OMe})_3$ | 19                                    | 7                                                                |

### S7.1.2 $^{19}\text{F}$ NMR Spectra

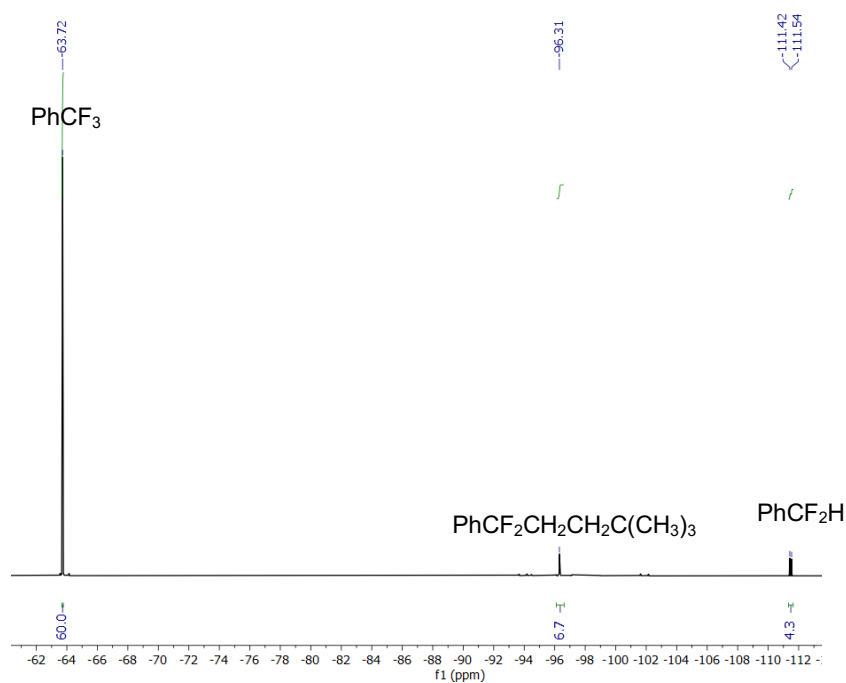

**Figure S89.**  $^{19}\text{F}$  NMR in THF- $\text{H}_8$  **1-Ce** with 1 equiv. 3,3-dimethylbut-1-ene and 1 equiv. PhCF<sub>3</sub> following 300 hours of irradiation under a 40 W Kessil A160WE Tuna Blue lamp.

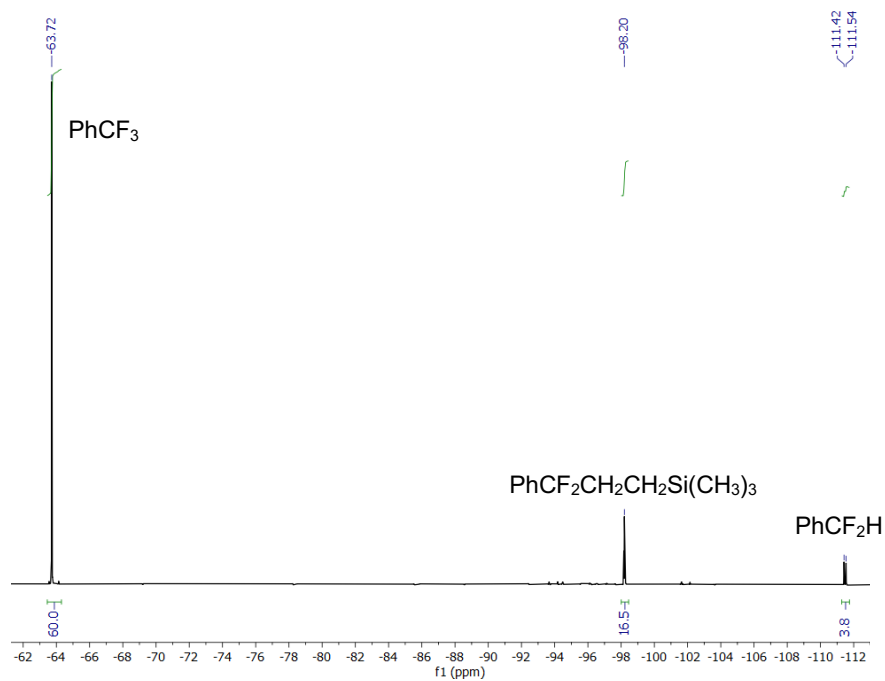

**Figure S90.**  $^{19}\text{F}$  NMR in THF- $\text{H}_8$  **1-Ce** with 1 equiv. trimethyl(vinyl)silane and 1 equiv. PhCF<sub>3</sub> following 300 hours of irradiation under a 40 W Kessil A160WE Tuna Blue lamp.

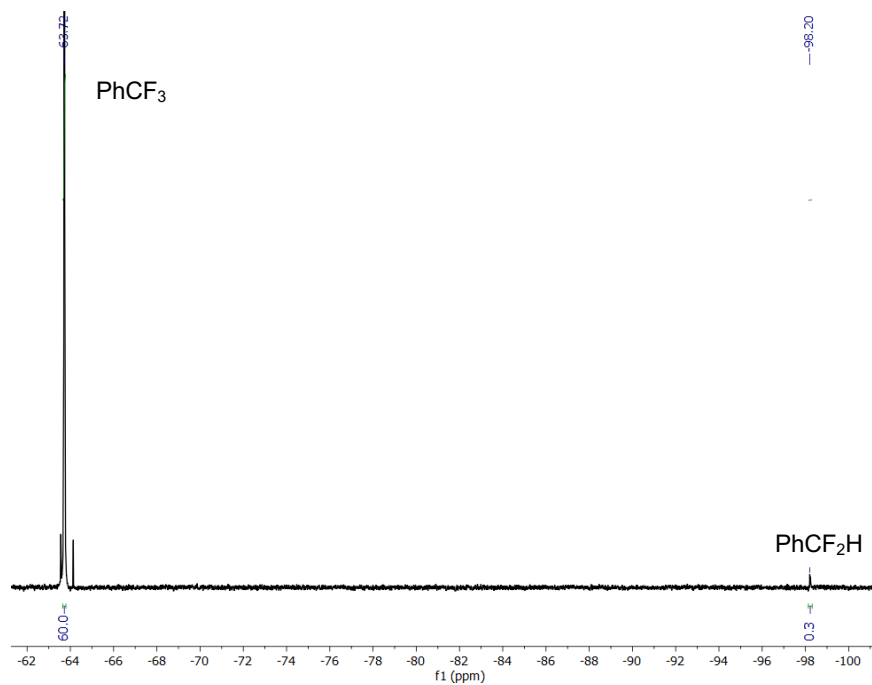

**Figure S91.**  $^{19}\text{F}$  NMR in THF- $\text{H}_8$  **1-La** with 1 equiv. trimethyl(vinyl)silane and 1 equiv.  $\text{PhCF}_3$  following 300 hours of irradiation under a 40 W Kessil A160WE Tuna Blue lamp.

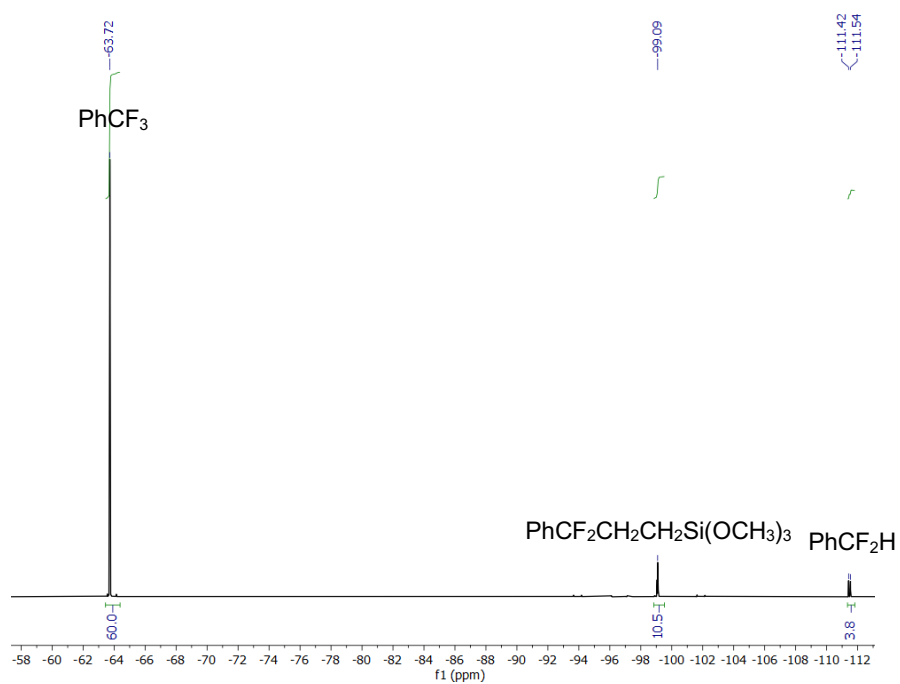

**Figure S92.**  $^{19}\text{F}$  NMR in THF- $\text{H}_8$  **1-Ce** with 1 equiv. trimethoxy(vinyl)silane and 1 equiv.  $\text{PhCF}_3$  following 300 hours of irradiation under a 40 W Kessil A160WE Tuna Blue lamp.

## S7.2. Optimized reactions

### S7.2.1 General procedure

In a glovebox, a Young NMR tube was charged with catalyst (0.0500 mmol, 5 equiv.) and THF (0.5 mL). Alkene (0.0500 mmol, 5 equiv.) was then added using a micropipette. The sample was then irradiated with light and monitored periodically by  $^1\text{H}$  and  $^{19}\text{F}$  NMR spectroscopy, with a final time point being taken after 100 hours irradiation.

### S7.2.2 $^{19}\text{F}$ NMR Spectra

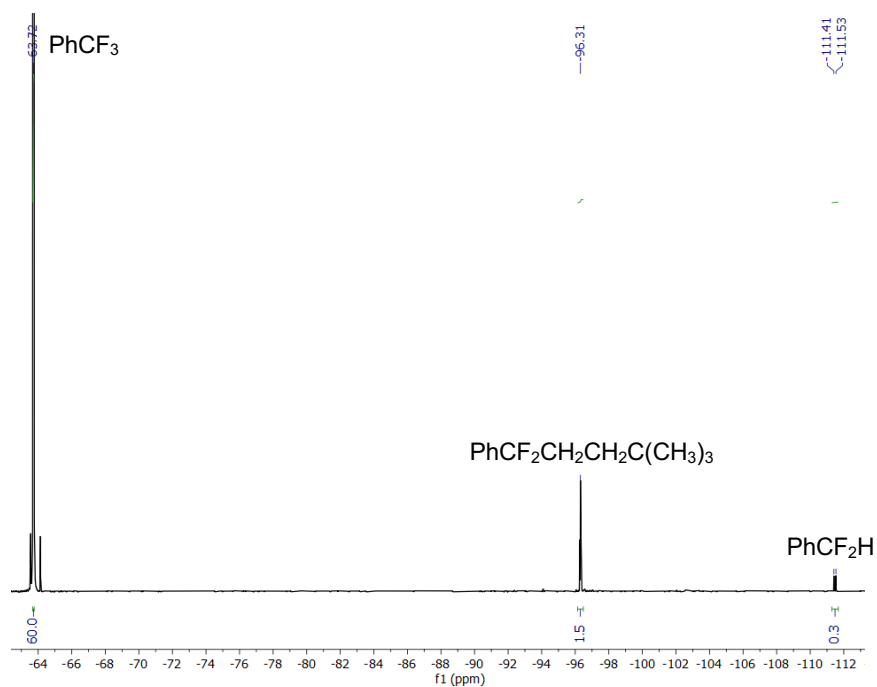

**Figure S93.**  $^{19}\text{F}$  NMR in THF- $\text{H}_8$  **1-Ce** with 5 equiv. 3,3-dimethylbut-1-ene and 5 equiv.  $\text{PhCF}_3$  following 70 hours of irradiation under a 40 W Kessil A160WE Tuna Blue lamp.

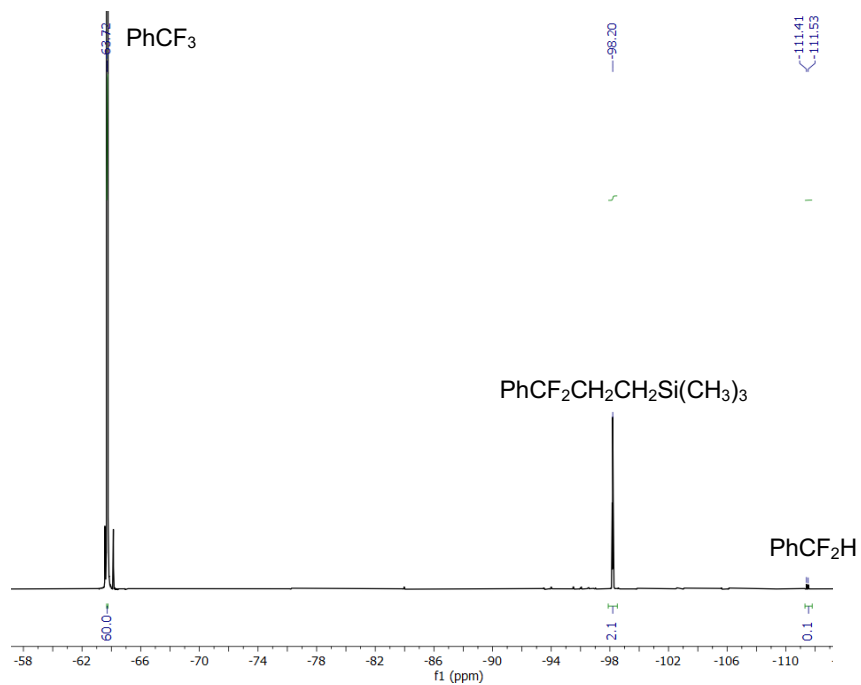

**Figure S94.**  $^{19}\text{F}$  NMR in THF- $\text{H}_8$  **1-Ce** with 5 equiv. trimethyl(vinyl)silane and 5 equiv.  $\text{PhCF}_3$  following 100 hours of irradiation under a 40 W Kessil A160WE Tuna Blue lamp.

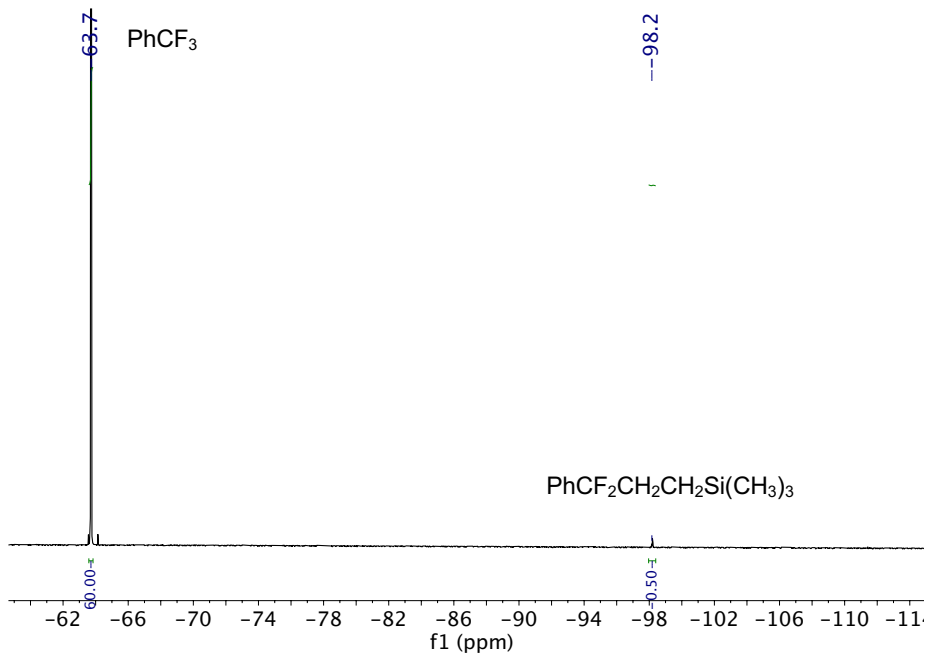

**Figure S95.**  $^{19}\text{F}$  NMR in THF- $\text{H}_8$  **1-La** with 5 equiv. trimethyl(vinyl)silane and 5 equiv.  $\text{PhCF}_3$  following 100 hours of irradiation under a 40 W Kessil A160WE Tuna Blue lamp.

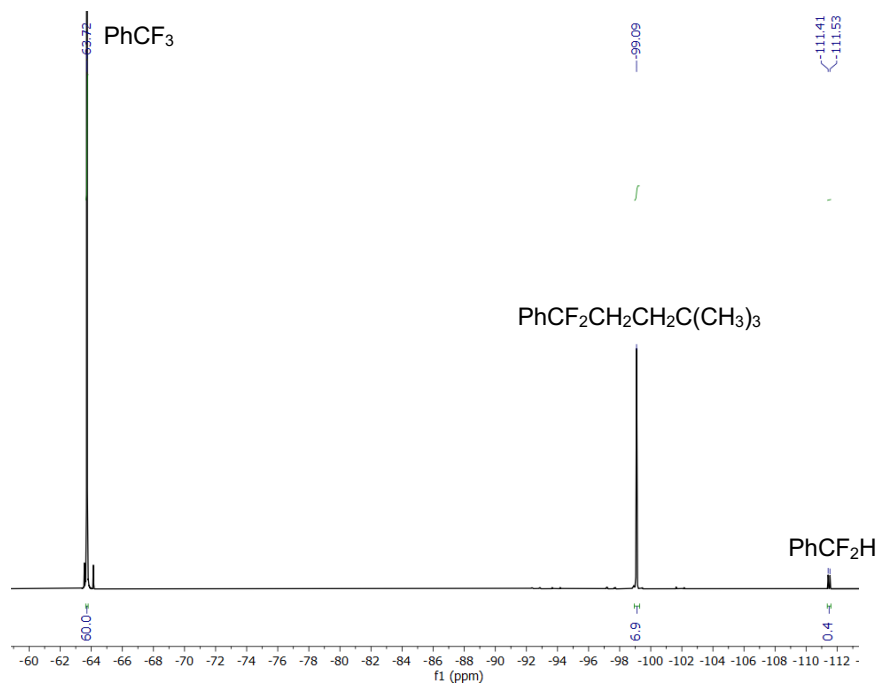

**Figure S96.**  $^{19}\text{F}$  NMR in  $\text{THF-H}_8$  **1-Ce** with 5 equiv. trimethoxy(vinyl)silane and 5 equiv.  $\text{PhCF}_3$  following 100 hours of irradiation under a 40 W Kessil A160WE Tuna Blue lamp.

## S8 Miscellaneous and Control reactions

### S8.NMR spectroscopic investigation of possible interactions between PhCF<sub>3</sub> and **1-Ce** and **1-La**

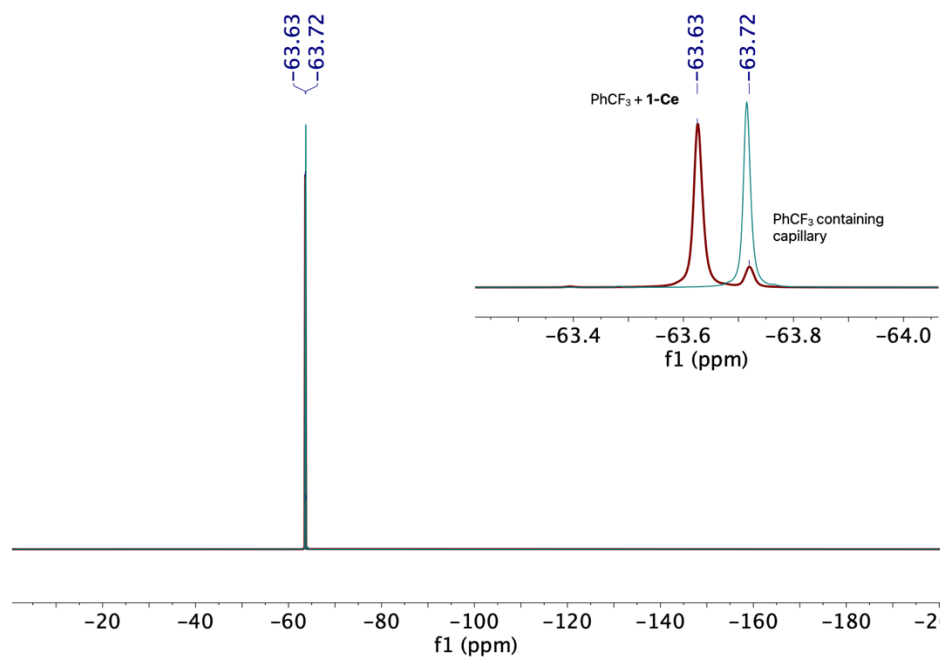

**Figure S97.** <sup>19</sup>F NMR spectrum of a 325 μM solution of PhCF<sub>3</sub> in THF-H<sub>8</sub> in a Young-tapped NMR tube with a capillary containing the same 325 μM solution of PhCF<sub>3</sub> in THF-H<sub>8</sub> before (green trace) and after (red trace) the addition of 0.01 mmol **1-Ce**. A shift is seen between PhCF<sub>3</sub> inside and outside the capillary which could be attributed to an interaction between PhCF<sub>3</sub> and **1-Ce**.

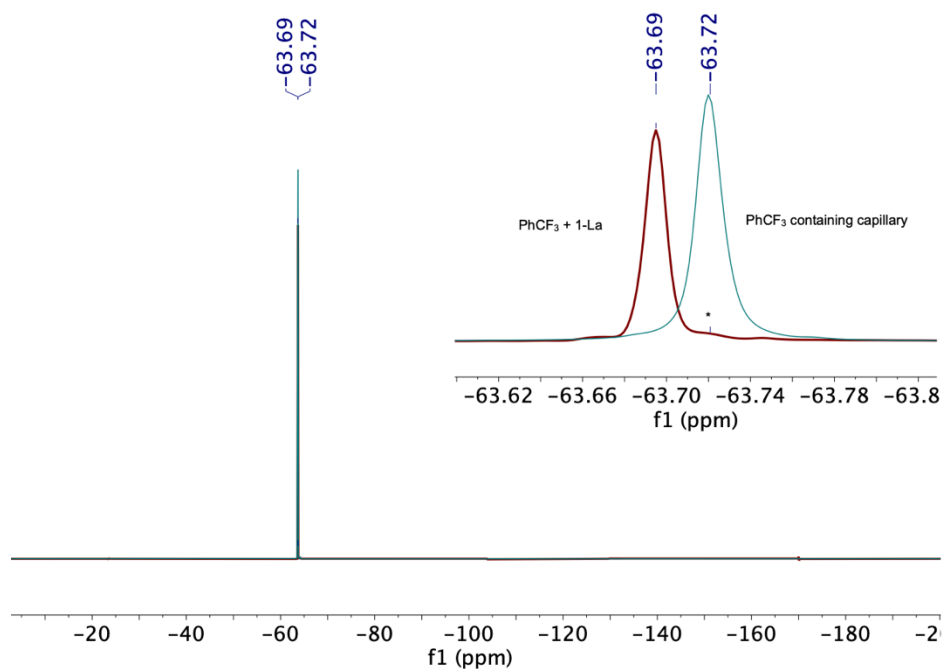

**Figure S98.**  $^{19}\text{F}$  NMR spectrum of a 325  $\mu\text{M}$  solution of  $\text{PhCF}_3$  in  $\text{THF-H}_8$  in a Young-tapped NMR tube with a capillary containing the same 325  $\mu\text{M}$  solution of  $\text{PhCF}_3$  in  $\text{THF-H}_8$  before (green trace) and after (red trace) the addition of 0.01 mmol **1-La**. A shoulder marked (\*) seen following addition of **1-La**, which could be attributed to an interaction between  $\text{PhCF}_3$  and **1-La**.



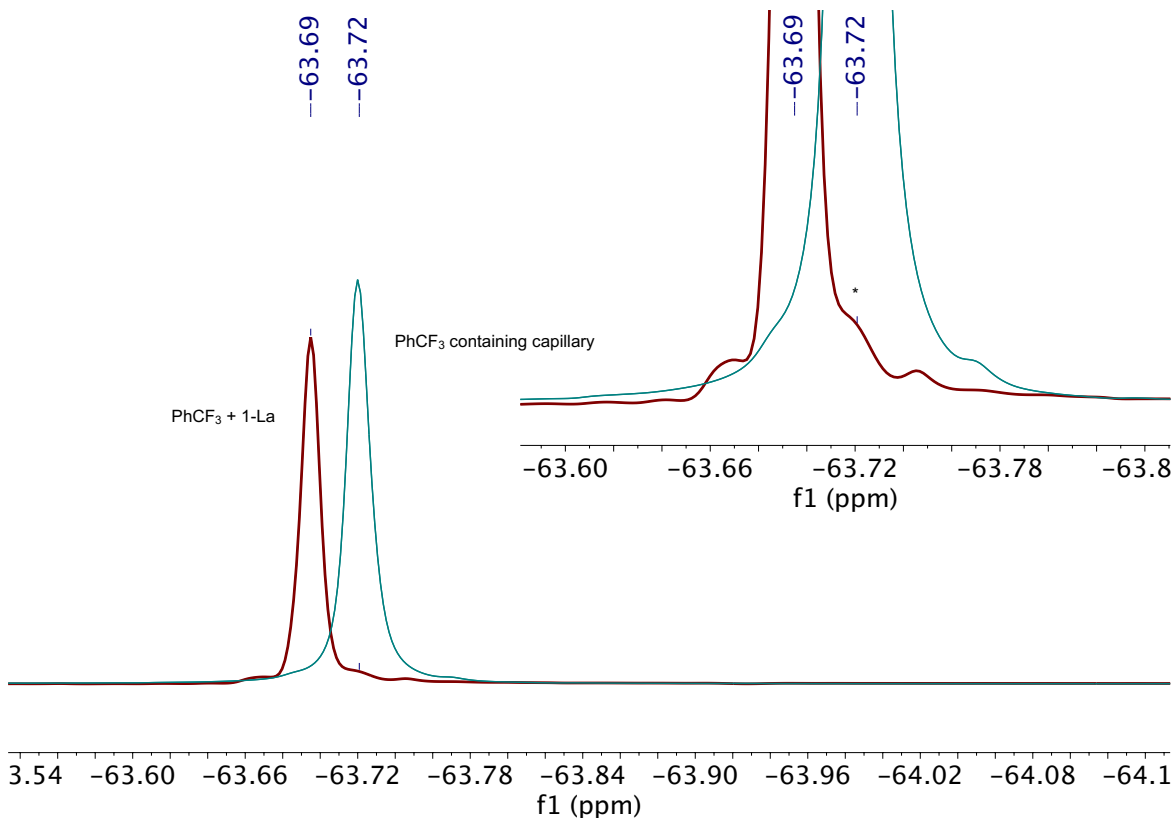

**Figure S99.** Additional  $^{19}\text{F}$  NMR spectrum of 325  $\mu\text{M}$  solution of  $\text{PhCF}_3$  in  $\text{THF-H}_8$  in a Young-tapped NMR tube with a capillary containing the same 325  $\mu\text{M}$  solution of  $\text{PhCF}_3$  in  $\text{THF-H}_8$  before (green trace) and after (red trace) the addition of 0.01 mmol **1-La**. The shoulder marked (\*) seen following addition of **1-La**, which could be attributed to an interaction between  $\text{PhCF}_3$  and **1-La** is highlighted.

## S8.2 Radical trapping experiments

### S8.2.1 Independent synthesis of 1,1-difluoro-2,3-dihydro-1H-indene (**10**)

Following a literature method, diethylaminosulfur trifluoride (2.70 mL, 0.0205 mol, 3 equiv.), was added dropwise to an ice-cold solution of 2-methyl-2,3-dihydro-1H-inden-1-one (0.940 mL, 0.0680, 1 equiv.) in dichloromethane (20 mL). The reaction mixture was warmed to room temperature and then heated to reflux for 36 hours. The solution was cooled and added dropwise to a saturated aqueous sodium hydrogencarbonate, extracted with dichloromethane (3 x 10 mL), washed with brine, and dried over magnesium sulfate. Volatiles were removed under vacuum to give a low yield of crude product, identified as containing **10** by  $^{19}\text{F}$  NMR, LCMS, and HRMS.

$^{19}\text{F}$  NMR (470 MHz,  $\text{CDCl}_3$ )  $\delta$  -96.07 (dd,  $J = 15.2, 4.4$  Hz), -96.60 (dd,  $J = 15.3, 4.4$  Hz), -98.78 (d,  $J = 14.3$  Hz), -99.31 (d,  $J = 14.2$  Hz).  $m/z=168$ . HRMS Calcd  $[\text{2M+MeCN+H}]^+$  378.1942; found  $[\text{2M+MeCN+H}]^+$  378.1948. Residual = 1.586 ppm.

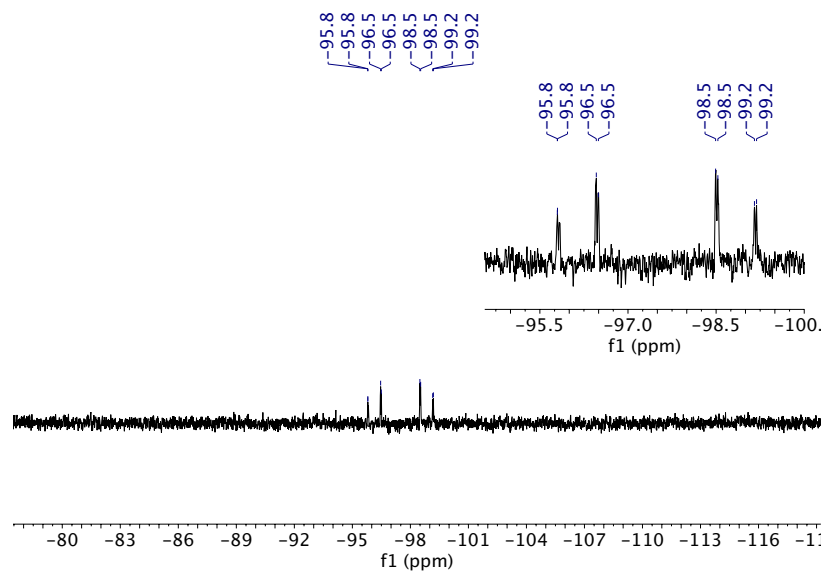

**Figure S100.**  $^{19}\text{F}$  NMR in  $\text{CDCl}_3$  of 1,1-difluoro-2,3-dihydro-1H-indene **10** made from the independent synthesis.

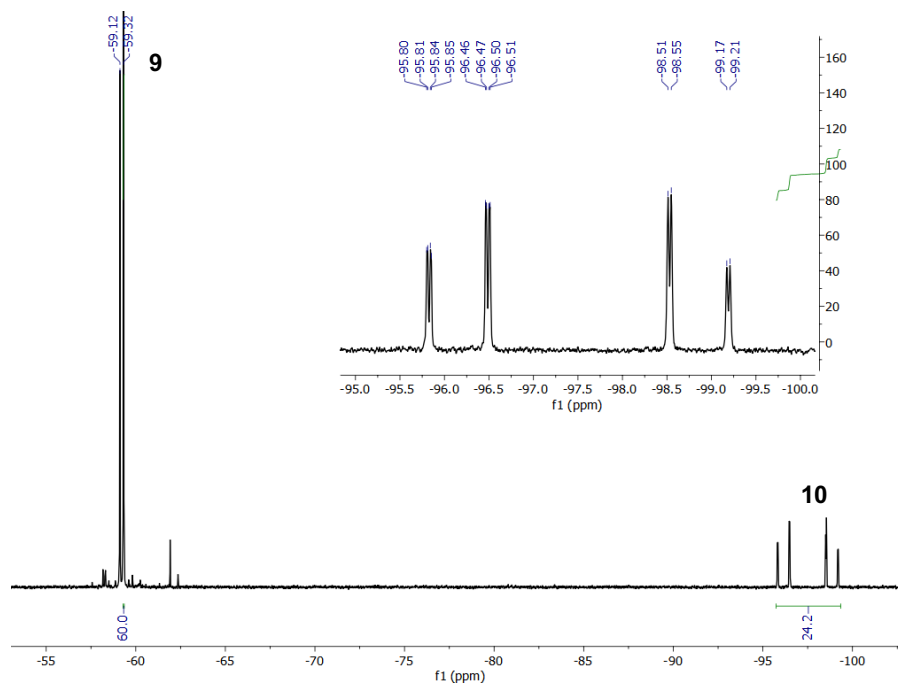

**Figure S101.**  $^{19}\text{F}$  NMR in THF- $\text{H}_8$  of **1-Ce** with 5 equiv. **9**, following 6 days irradiation with a 40 W Kessil A160WE Tuna Blue lamp at 70 °C.

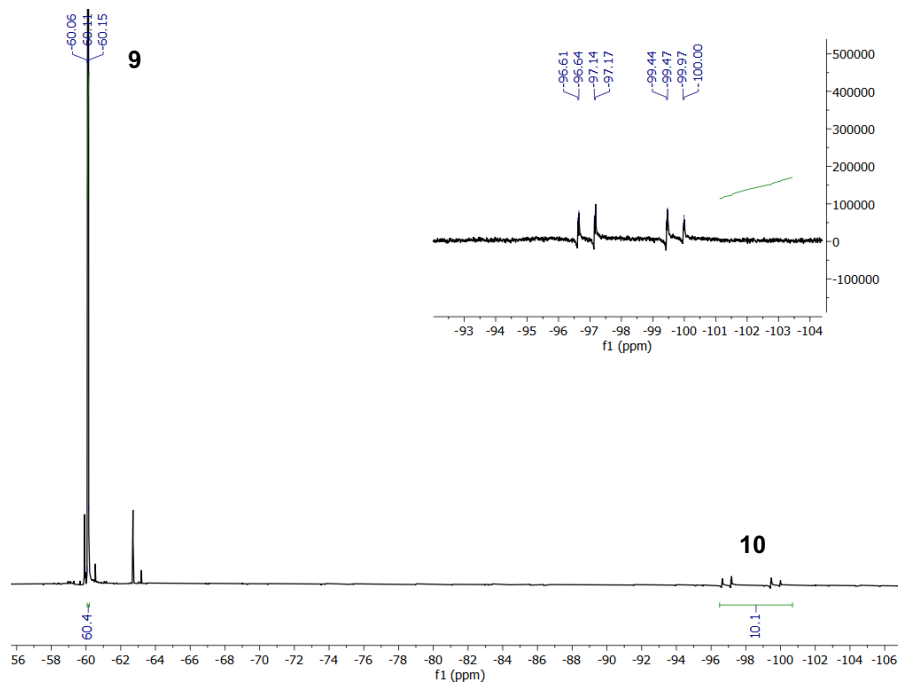

**Figure S102.**  $^{19}\text{F}$  NMR in THF- $\text{H}_8$  of **1-La** with 5 equiv. **9**, following 7 days irradiation with a 40 W Kessil A160WE Tuna Blue lamp at room temperature.

**S8.3 Formation of 7-Mg via addition of  $\text{MgBn}_2(\text{THF})_2$  to 1-Ce and 1-La**

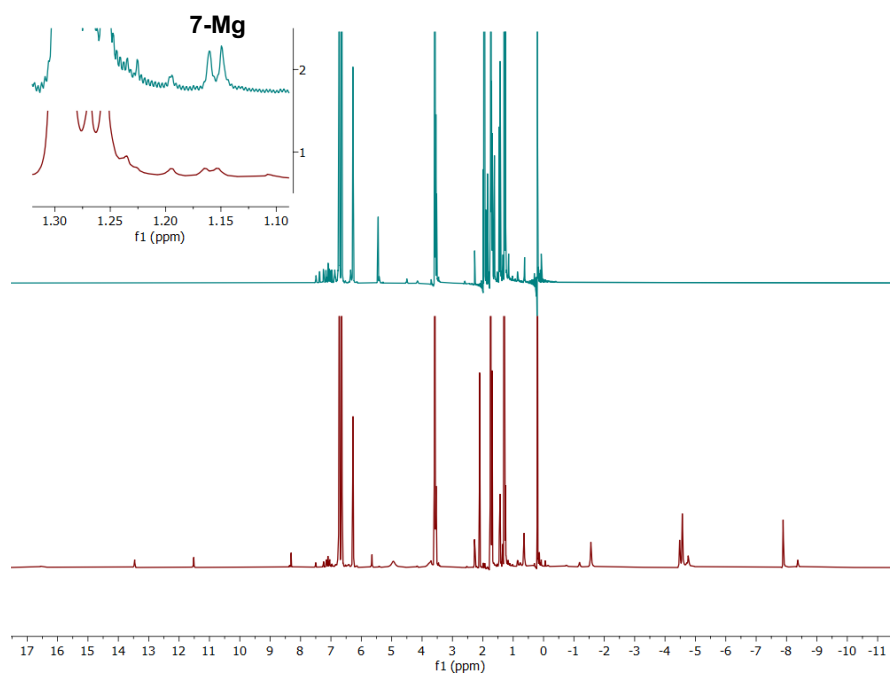

**Figure S103.**  $^1\text{H}$  NMR in  $\text{THF-D}_8$  of **1-La** (top spectrum, blue) and **1-Ce** (bottom spectrum, red) with 5 equiv.  $\text{MgBn}_2(\text{THF})_2$  and 1 equiv. after 24 hours, to monitor the formation of **7-Mg**. A single iPr resonance of **7-Mg** is highlighted and integrated relative to a  $\text{Si}(\text{SiMe}_3)_4$  internal standard, demonstrating the higher conversion of **1-La** to **7-Mg** in comparison to **1-Ce**.

#### S8.4 Testing catalyst stability under a 40 W Kessil A160WE Tuna Blue lamp

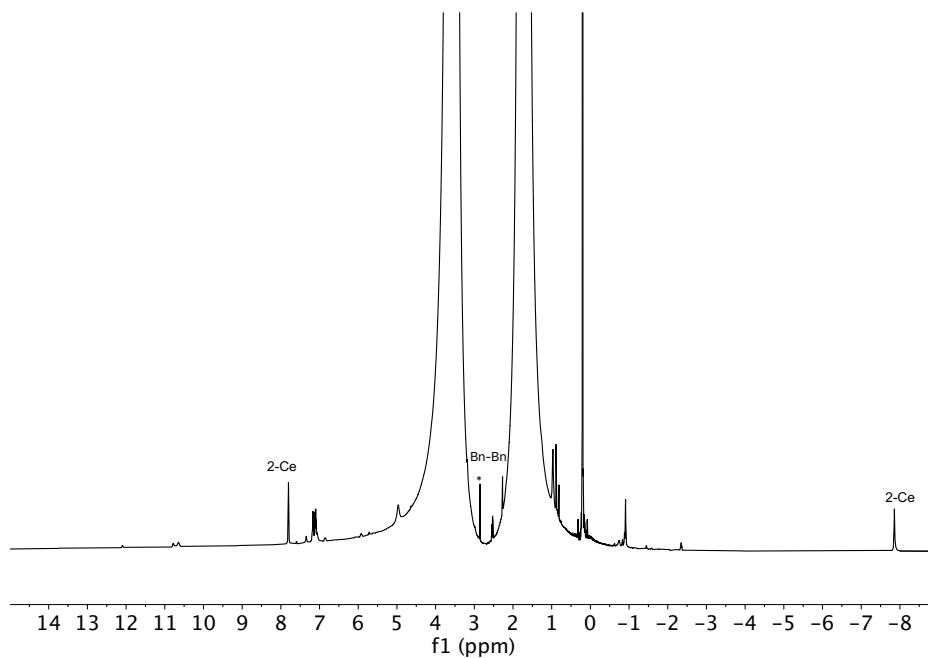

**Figure S104.**  $^1\text{H}$  NMR in  $\text{THF-H}_8$  **6-Ce** following 72 hours of irradiation under a 40 W Kessil A160WE Tuna Blue lamp. The complete consumption of **6-Ce** to form **2-Ce** and bibenzyl (Bn-Bn) was observed after this period.

#### S8.5 Irradiation wavelength dependence of catalysis

##### S8.5.1 Table of results

**Table S6.** Defluoroalkylative coupling of  $\text{PhCF}_3$  with dibenzyl magnesium mediated by 20 mol% catalyst loading of **1-Ce** followed by 42 hours irradiation with a variety of wavelengths of light, with yields determined by  $^{19}\text{F}$  NMR spectroscopy.

| Irradiation wavelength (nm) | Conversion to $\text{PhCF}_2\text{CH}_2\text{Ph}$ and $\text{PhCF}_2\text{H}$<br>(%) |
|-----------------------------|--------------------------------------------------------------------------------------|
| 390                         | 46                                                                                   |
| 467                         | 51                                                                                   |
| 525                         | 25                                                                                   |

### S8.5.2 $^{19}\text{F}$ NMR spectra

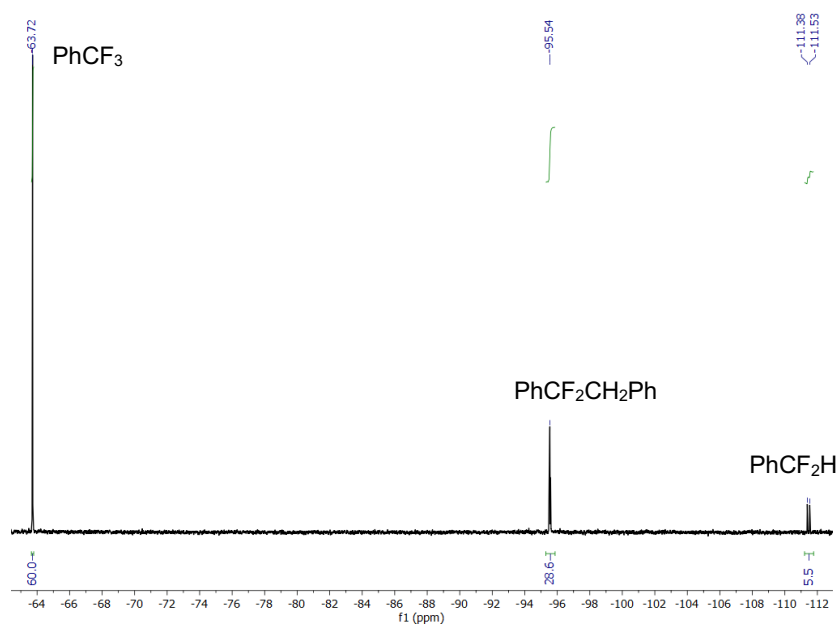

**Figure S105.**  $^{19}\text{F}$  NMR in THF-H<sub>8</sub> 20 mol% **1-Ce** with  $\text{MgBn}_2(\text{THF})_2$  and  $\text{PhCF}_3$  following 80 hours of irradiation under a 52 W Kessil PR160L 390 nm lamp.

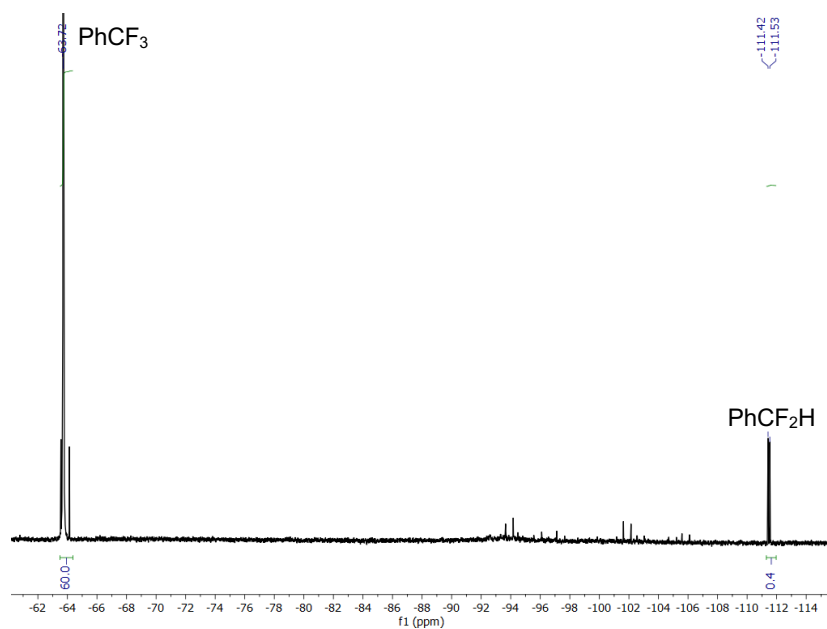

**Figure S106.**  $^{19}\text{F}$  NMR in THF-H<sub>8</sub> 20 mol% **1-La** with  $\text{MgBn}_2(\text{THF})_2$  and  $\text{PhCF}_3$  following 48 hours of irradiation under a 52 W Kessil PR160L 390 nm lamp. Just 1% conversion to  $\text{PhCF}_2\text{H}$  was observed alongside the generation of multiple other unidentified fluorine-containing species. The decomposition of **1-La** was also seen by  $^1\text{H}$  NMR.

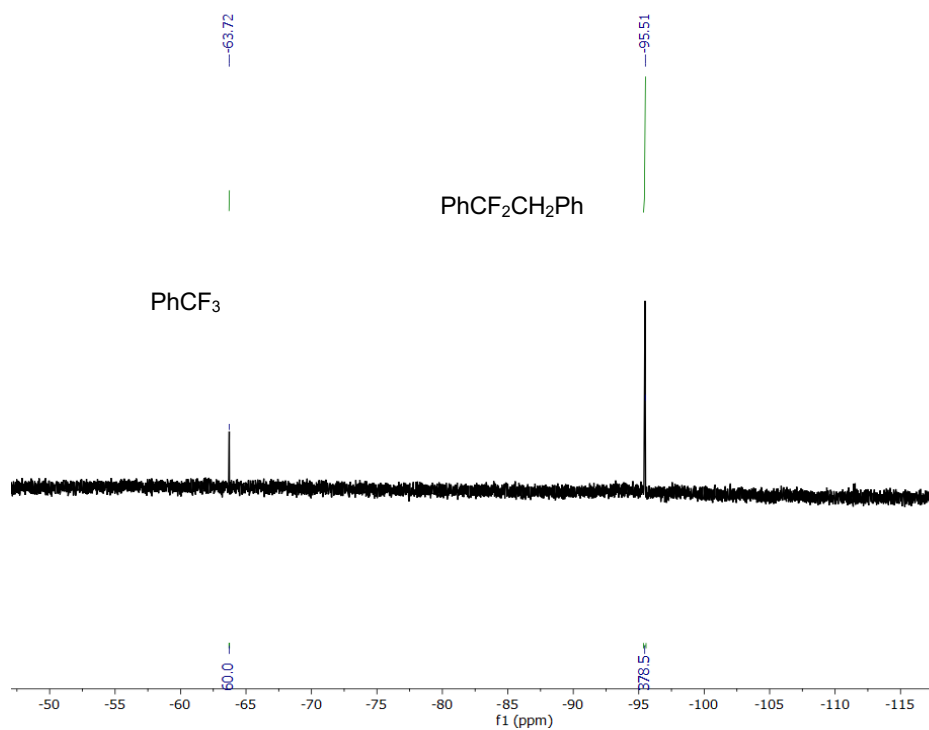

**Figure S107.**  $^{19}\text{F}$  NMR in  $\text{THF-H}_8$  20 mol% **1-Ce** with  $\text{MgBn}_2(\text{THF})_2$  and  $\text{PhCF}_3$  following 80 hours of irradiation under a 40 W Kessil A160WE Tuna blue lamp

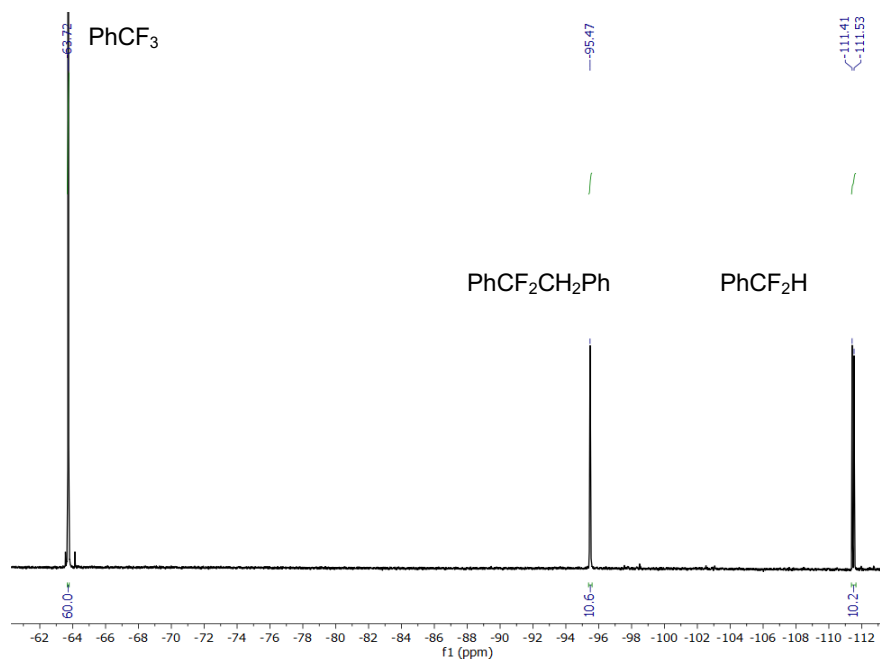

**Figure S108.**  $^{19}\text{F}$  NMR in  $\text{THF-H}_8$  20 mol% **1-Ce** with  $\text{MgBn}_2(\text{THF})_2$  and  $\text{PhCF}_3$  following 80 hours of irradiation under a 44 W Kessil PR160L 467 nm lamp.

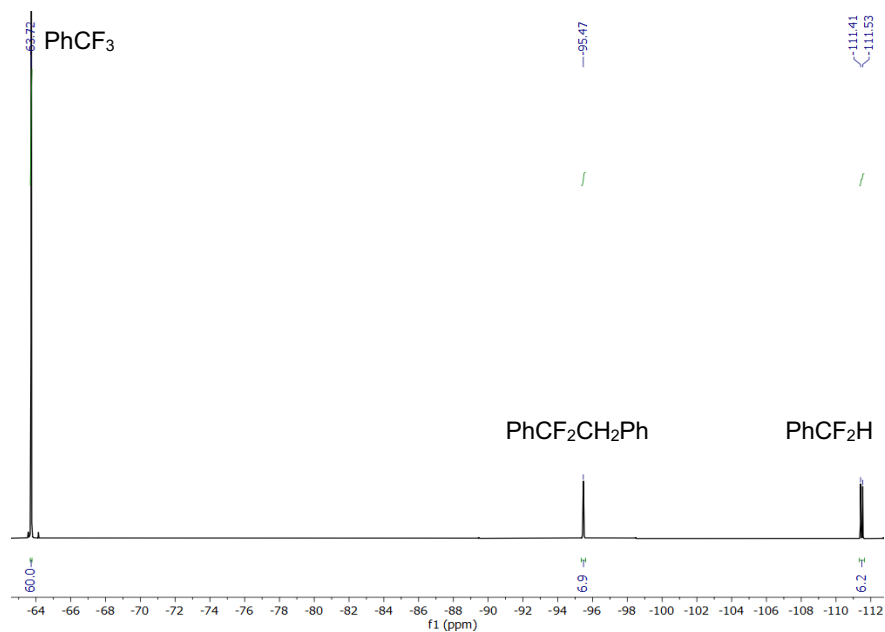

**Figure S109.**  $^{19}\text{F}$  NMR in THF- $\text{H}_8$  20 mol% **1-Ce** with  $\text{MgBn}_2(\text{THF})_2$  and  $\text{PhCF}_3$  following 80 hours of irradiation under a 52 W Kessil PR160L 525 nm lamp.

### S8.6 Defluorination selectivity

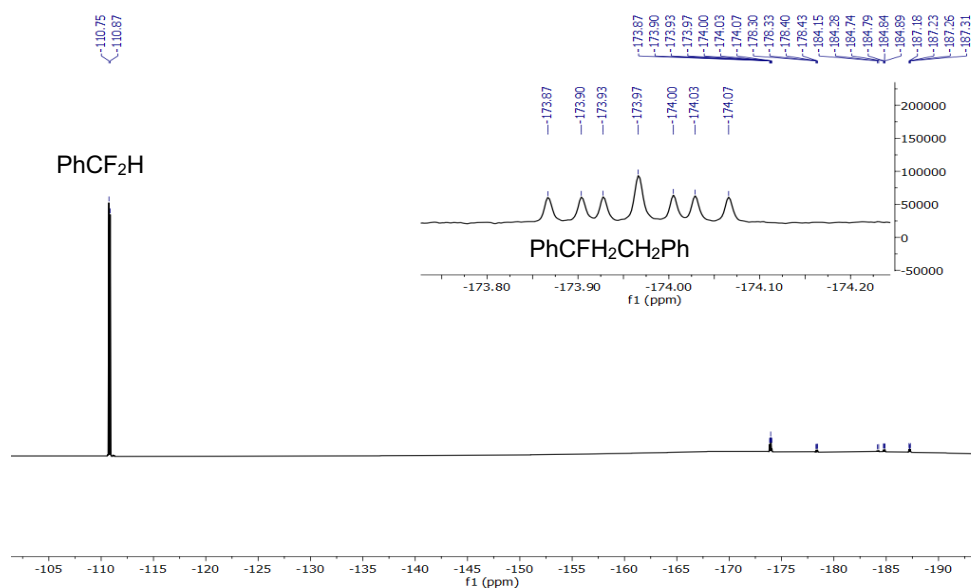

**Figure S110.**  $^{19}\text{F}$  NMR in THF- $\text{H}_8$  20 mol% **1-Ce** with  $\text{MgBn}_2(\text{THF})_2$  and  $\text{PhCF}_2\text{H}$  following 110 hours of irradiation under a 40 W Kessil A160WE Tuna Blue lamp. 47% conversion to  $\text{PhCFH}_2\text{CH}_2\text{Ph}$  was observed alongside multiple other unidentified fluorine-containing compounds.<sup>17</sup> The negligible amount of the target compound in catalysis with  $\text{MgBn}_2(\text{THF})_2$  and  $\text{PhCF}_3$  suggest no significant initial defluorination of  $\text{PhCF}_2\text{CH}_2\text{Ph}$  and  $\text{PhCF}_2\text{H}$  prior to the addition of catalyst.



### S8.7 Evidence of formation of metal fluoride complex in defluoroalkylation reactions

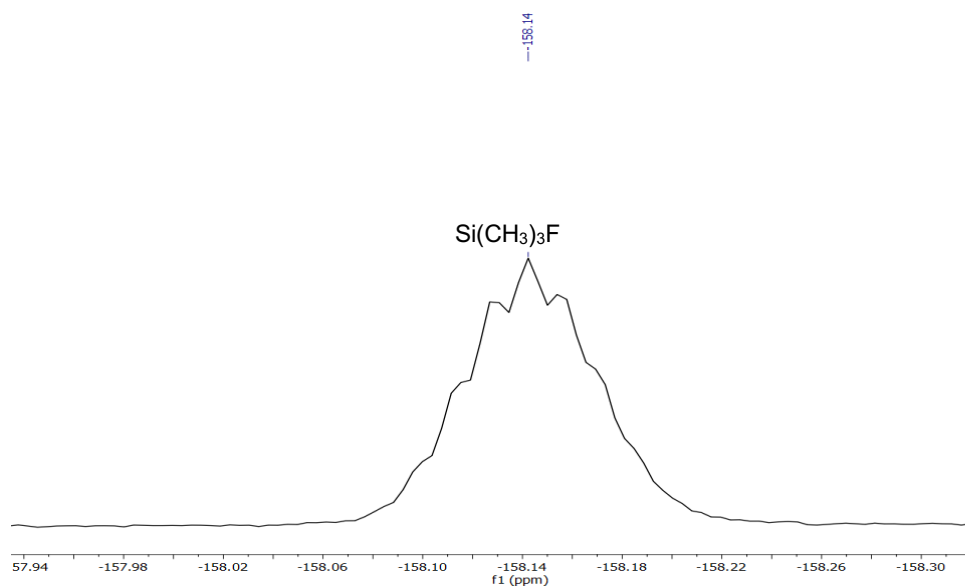

**Figure S111.**  $^{19}\text{F}$  NMR in  $\text{THF-H}_8$  following the addition of an excess of chlorotrimethylsilane to a reaction mixture containing 1 mol% **1-Ce** with  $\text{MgBn}_2(\text{THF})_2$  and  $\text{PhCF}_2\text{H}$  following 63 hours of irradiation under a 40 W Kessil A160WE Tuna Blue lamp. The generation of fluorotrimethylsilane was observed.

### S8.9. Variable temperature NMR experiments with **1-Ce**

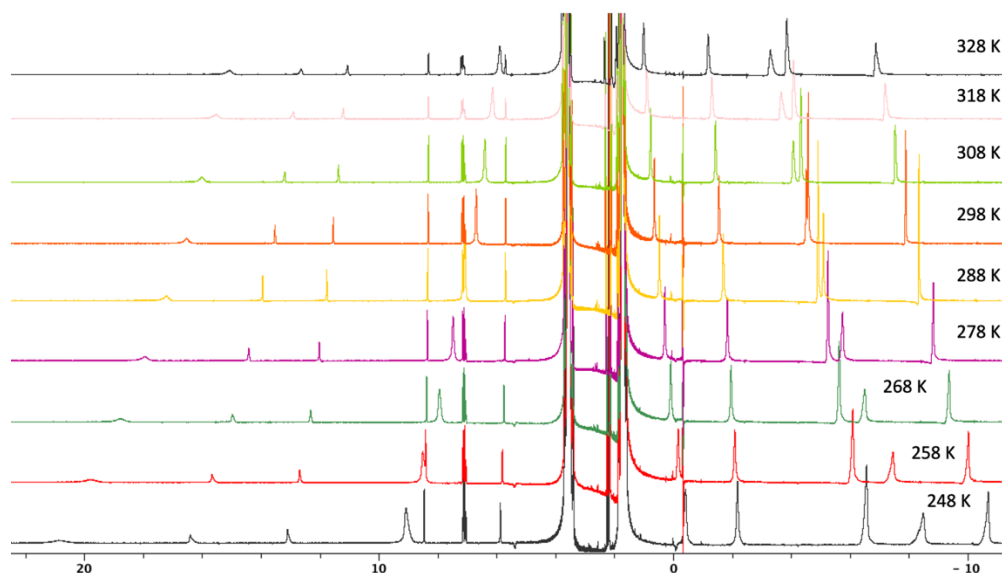

**Figure S112.** Variable temperature NoD  $^1\text{H}$  NMR of **1-Ce** in  $\text{THF-H}_8$  with 1 equivalent  $\text{MgBn}_2(\text{THF})_2$ . No evidence of NHC lability was observed.

### S8.10 Ligand exchange of Ce and Mg complexes

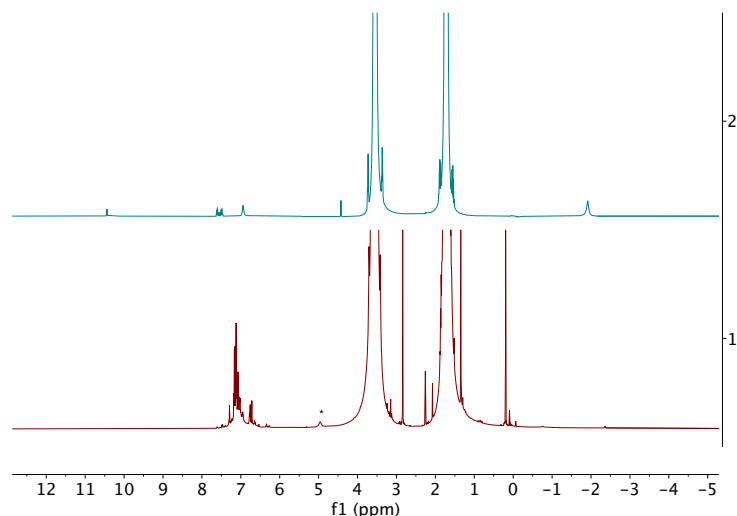

**Figure S113.** NoD  $^1\text{H}$  NMR of 20 mol% **4-Ce** in THF- $\text{H}_8$  with 5 equivalent  $\text{MgBn}_2(\text{THF})_2$  and  $\text{PhCF}_3$  before (top spectrum) and following (bottom spectrum) 80 hours irradiation with a 40 W Kessil A160WE Tuna Blue lamp. Generation of **6-Ce** is observed (marked \*), indicating that bidentate aryloxy-NHC ligand **L** contributes to the robustness of **1-Ce** over **4-Ce** in reaction mixtures.

### S8.11 Reaction to Target a Ce(III) Fluoride Adduct

To a 20 mL vial was added **6-Ce** (61.1 mg, 0.112 mmol, 1.00 equiv.) dissolved in THF (5 mL), resulting in a yellow-green solution. This solution was chilled in a freezer ( $-30\text{ }^\circ\text{C}$ ) for 15 minutes. With stirring, a similarly chilled solution of  $\text{BF}_3\text{OEt}_2$  (5.1 mg, 0.036 mmol, 0.32 equiv.) in THF (2 mL) was added dropwise, resulting in a rapid color change to bright yellow. The solution was warmed to room temperature with stirring for 1 hour, during which time the reaction mixture became turbid, then lightened to a brighter yellow and became homogeneous. The volatiles were then removed *in vacuo*, resulting in a yellow-green residue. Extracting with hexanes (2 x 3 mL) gave a bright green solution, which  $^1\text{H}$  NMR spectroscopy revealed to be **2-Ce**. The remaining yellow-orange residue was extracted with toluene and filtered to give a yellow-orange filtrate. Solvent was removed *in vacuo*, giving a yellow residue, which was recrystallized from a layered toluene/hexane solution stored at  $30\text{ }^\circ\text{C}$  overnight.

Crystals formed were suitable for X-ray diffraction and identified as  $[(\text{Cp}^{\text{Me4}})_2\text{Ce}(\text{BF}_4)(\text{THF})]_2$  (see S9), indicating successful abstraction of the benzyl group for a fluoride, which is subsequently capped by an additional  $\text{BF}_3$ .

## S8.11 Control reactions

### S8.11.1 Reactions in the dark

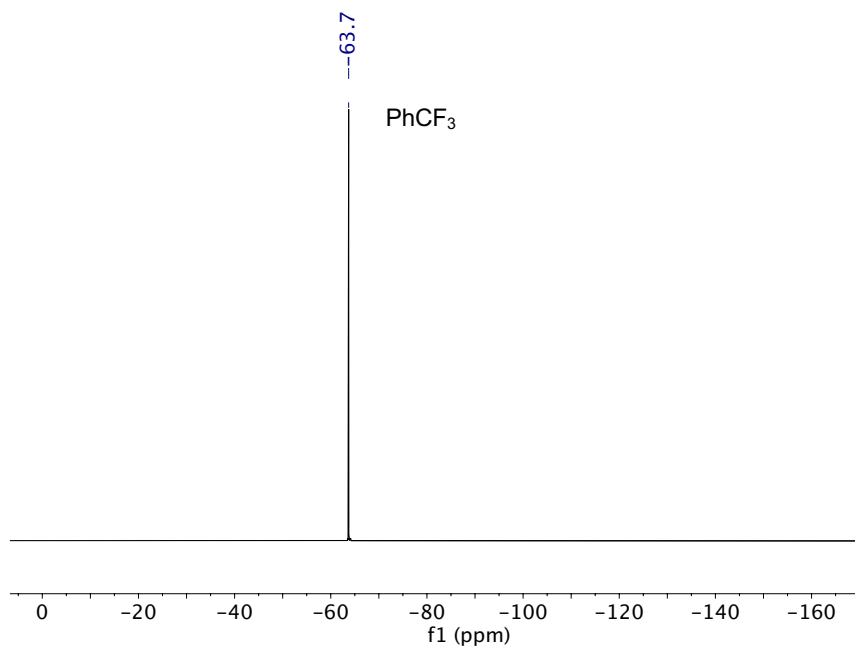

**Figure S114.**  $^{19}\text{F}$  NMR in THF- $\text{H}_8$  20 mol% **1-Ce** with  $\text{MgBn}_2(\text{THF})_2$  and  $\text{PhCF}_3$  after 72 hours with no irradiation. No  $\text{PhCF}_2\text{CH}_2\text{Ph}$ ,  $\text{PhCF}_2\text{H}$  or any other evidence of C-F activation was observed in this time period.

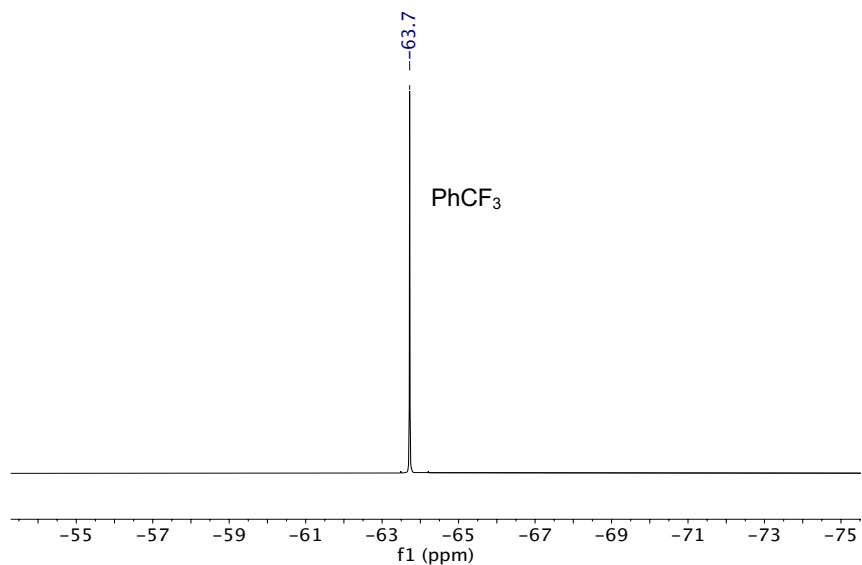

**Figure S115.**  $^{19}\text{F}$  NMR in THF- $\text{H}_8$  20 mol% **1-La** with  $\text{MgBn}_2(\text{THF})_2$  and  $\text{PhCF}_3$  after 72 hours with no irradiation. No  $\text{PhCF}_2\text{CF}_2\text{Ph}$ ,  $\text{PhCF}_2\text{H}$  or any other evidence of C-F activation was observed in this time period.

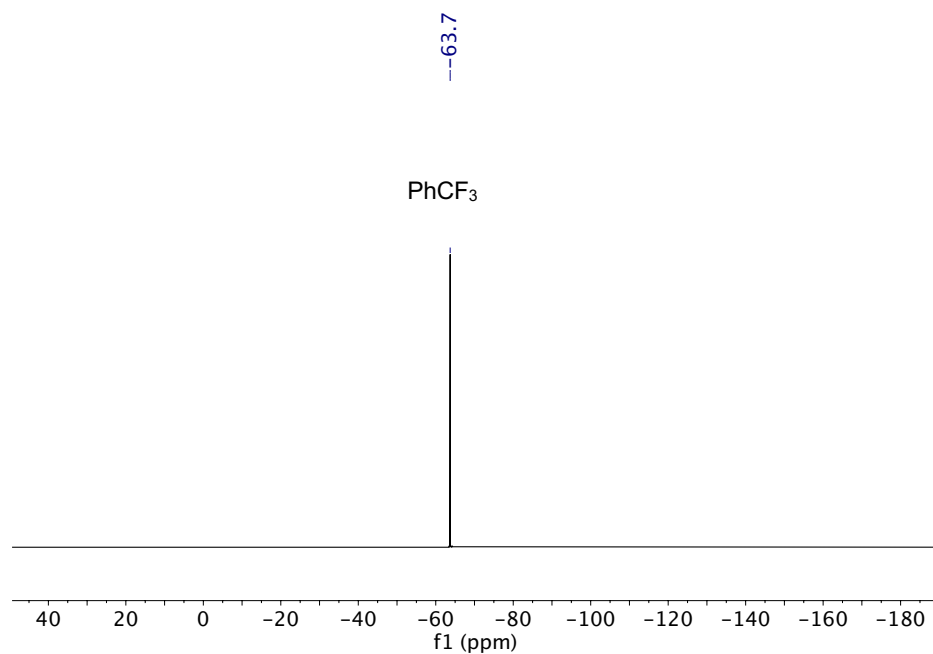

**Figure S116.**  $^{19}\text{F}$  NMR in THF- $\text{H}_8$  of **2-La** with 5 equiv.  $\text{PhCF}_3$  after 72 hours with no irradiation. No  $\text{PhCF}_2\text{CH}_2\text{Ph}$ ,  $\text{PhCF}_2\text{H}$  or any other evidence of C-F activation was observed in this time period, though **2-La** did gradually decompose in the presence of  $\text{PhCF}_3$ .

S8.11.2 Reactions of  $\text{MgBn}_2(\text{THF})_2$  and  $\text{PhCF}_3$  without the addition of catalyst

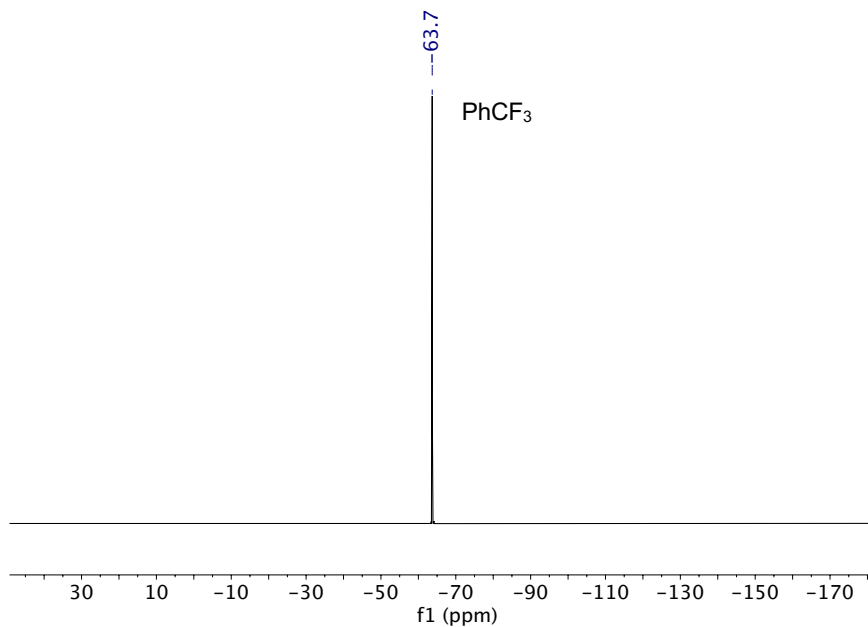

**Figure S117.**  $^{19}\text{F}$  NMR in  $\text{THF-H}_8$   $\text{PhCF}_3$  after 72 hours irradiation. No  $\text{PhCF}_2\text{H}$  or any other evidence of C–F activation was observed in this time period.

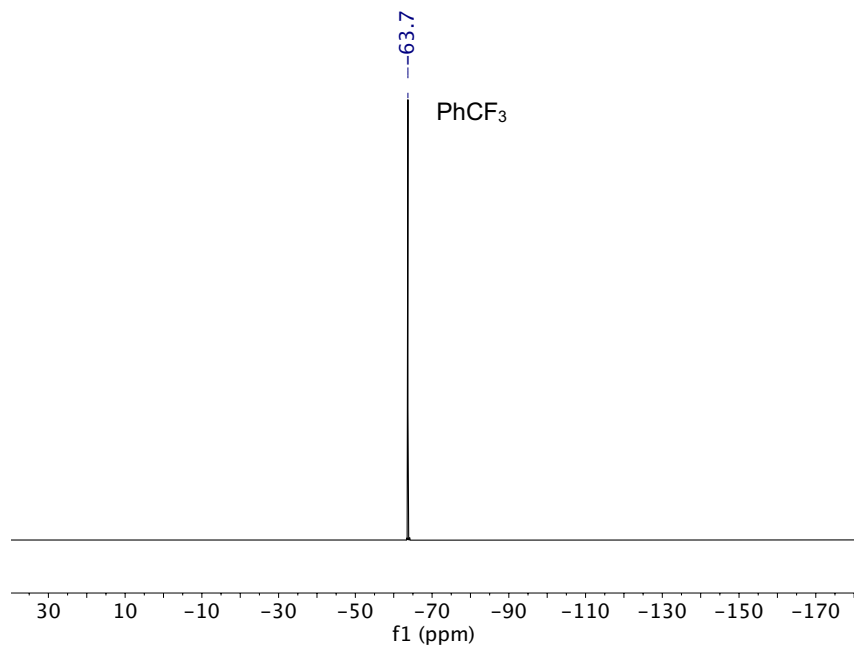

**Figure S118.**  $^{19}\text{F}$  NMR in  $\text{THF-H}_8$  20 mol%  $\text{MgBn}_2(\text{THF})_2$  and  $\text{PhCF}_3$  after 72 hours with no irradiation. No  $\text{PhCF}_2\text{CH}_2\text{Ph}$ ,  $\text{PhCF}_2\text{H}$  or any other evidence of C–F activation was observed in this time period.

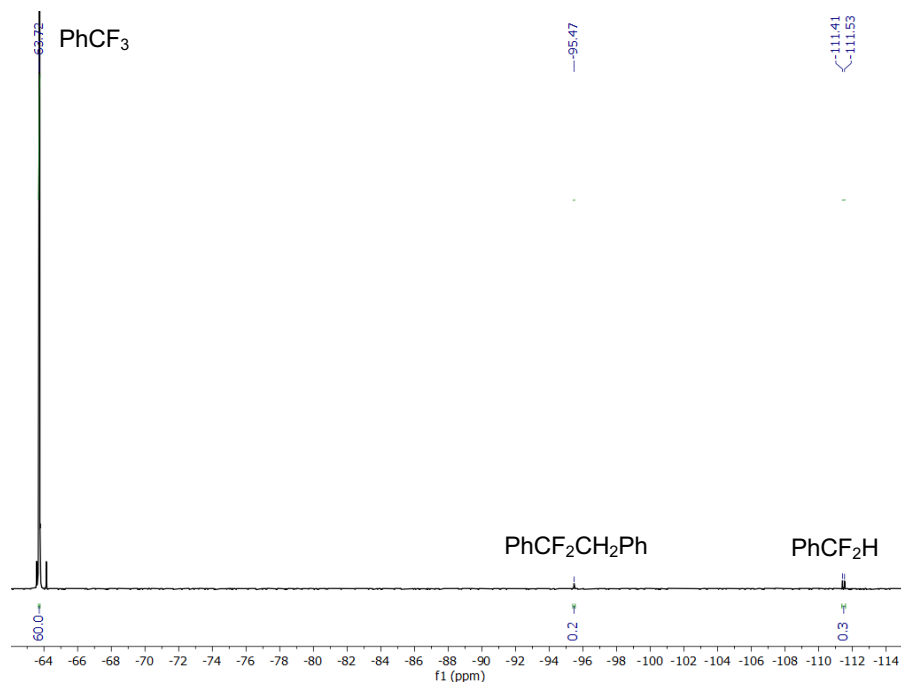

**Figure S119.**  $^{19}\text{F}$  NMR in  $\text{THF-H}_8$   $\text{MgBn}_2(\text{THF})_2$  and 1 equiv.  $\text{PhCF}_3$  after 48 hours irradiation under a 40 W Kessil A160WE Tuna Blue lamp. Just 1% total conversion to  $\text{PhCF}_2\text{CH}_2\text{Ph}$  and  $\text{PhCF}_2\text{H}$  was observed.

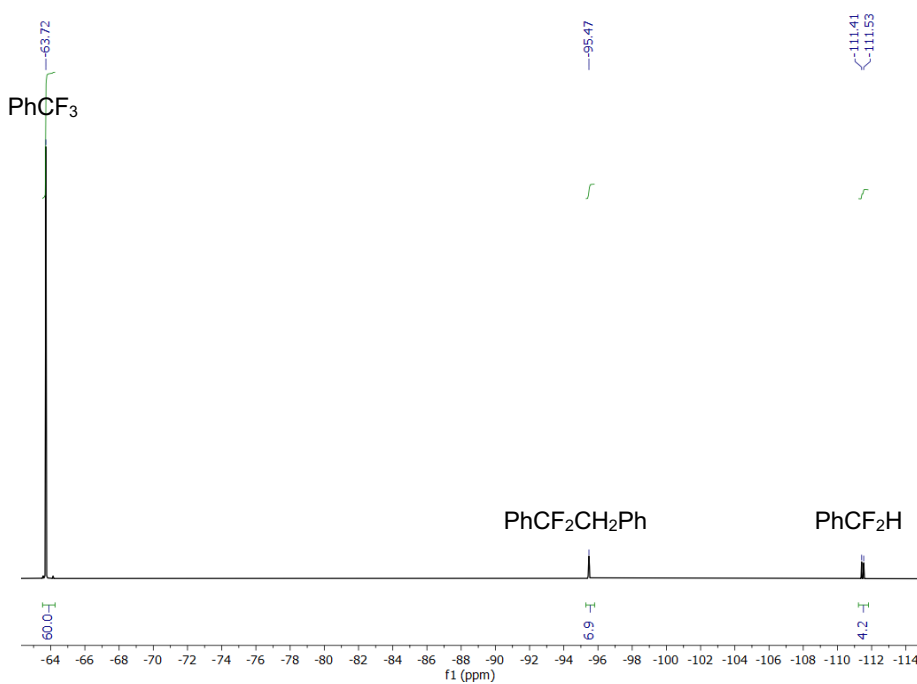

**Figure S120.**  $^{19}\text{F}$  NMR in  $\text{THF-H}_8$   $\text{MgBn}_2(\text{THF})_2$  and 1 equiv.  $\text{PhCF}_3$  after 260 hours irradiation under a 40 W Kessil A160WE Tuna Blue lamp. Just 22% total conversion to  $\text{PhCF}_2\text{CH}_2\text{Ph}$  and  $\text{PhCF}_2\text{H}$  was observed.

**S9 Crystallography**  
S9.1 Crystal Structures

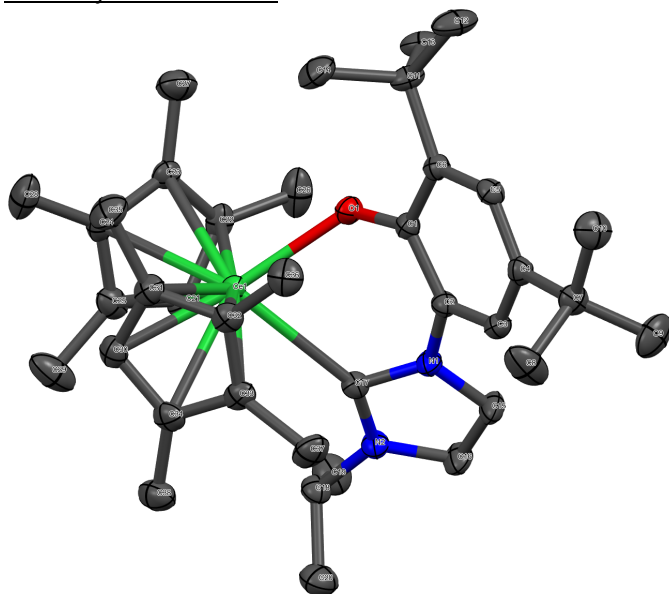

**Figure S121.** ORTEP diagram of **1-Ce**. Ellipsoids shown at 50% probability, lattice solvent, disorder and hydrogen atoms have been omitted for clarity.

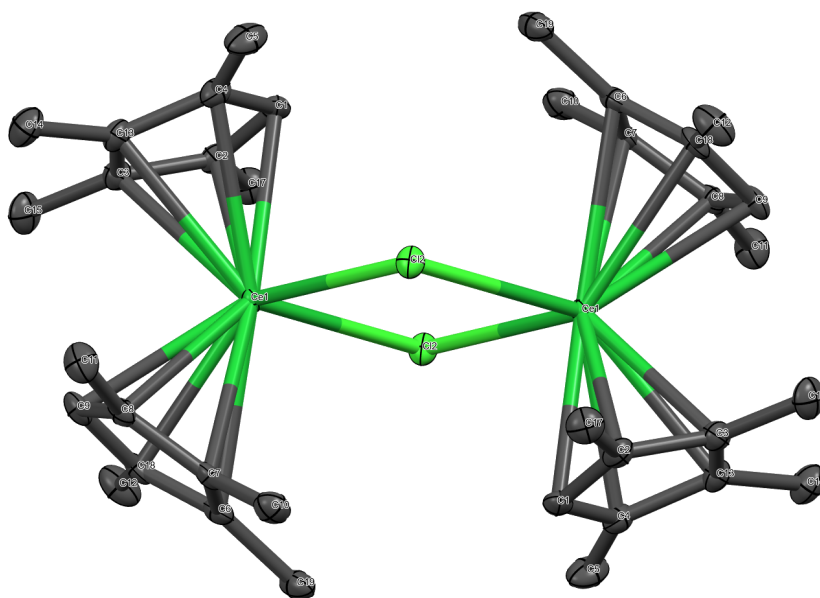

**Figure S122.** ORTEP diagram of **3-Ce**. Ellipsoids shown at 50% probability, lattice solvent, disorder and hydrogen atoms have been omitted for clarity.

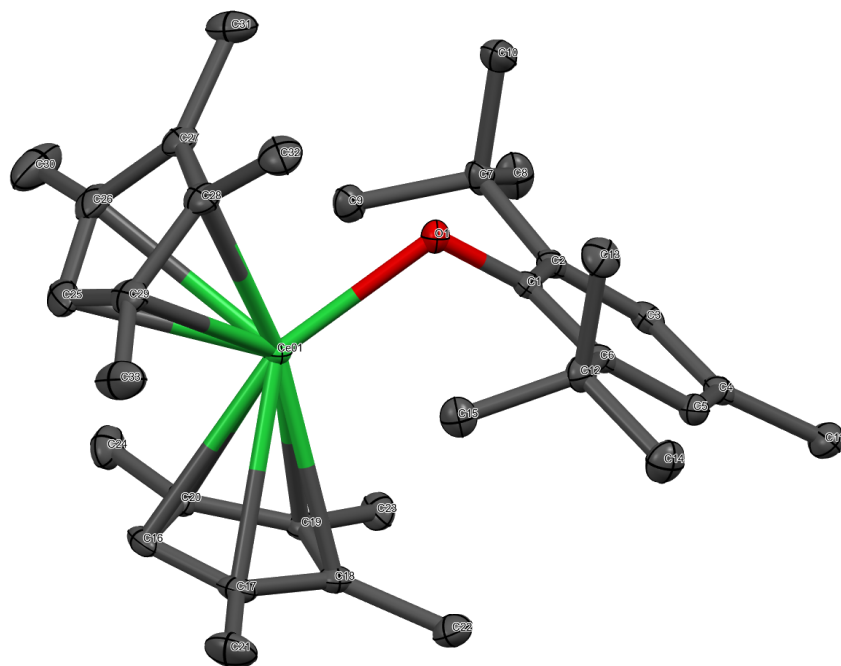

**Figure S123.** ORTEP diagram of **4-Ce**. Ellipsoids shown at 50% probability, lattice solvent, disorder and hydrogen atoms have been omitted for clarity.

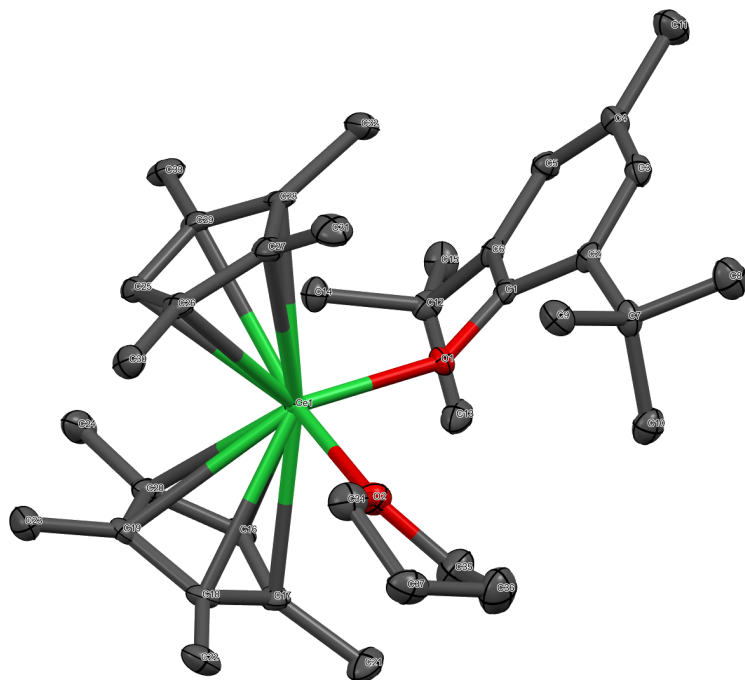

**Figure S124.** ORTEP diagram of **4-Ce(THF)**. Ellipsoids shown at 50% probability, lattice solvent, disorder and hydrogen atoms have been omitted for clarity.



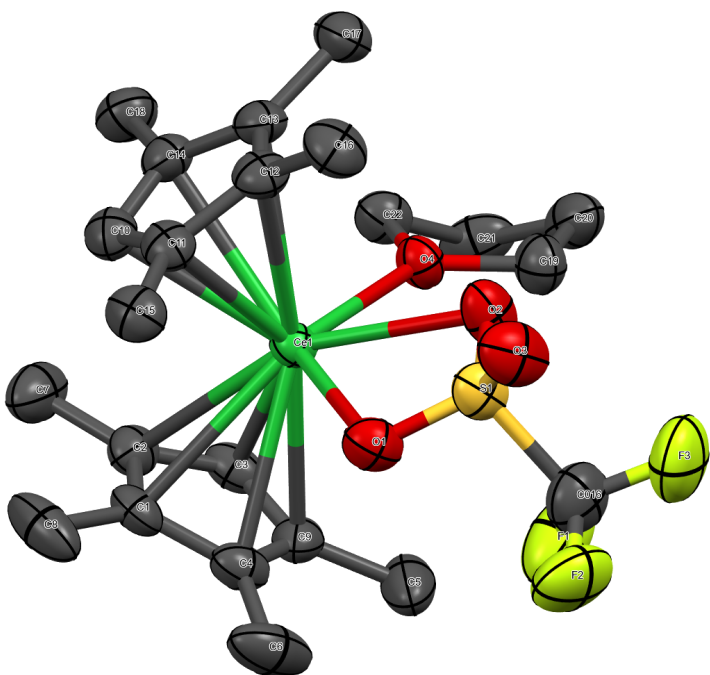

**Figure S125.** ORTEP diagram of **5-Ce**. Ellipsoids shown at 50% probability, lattice solvent, disorder and hydrogen atoms have been omitted for clarity.

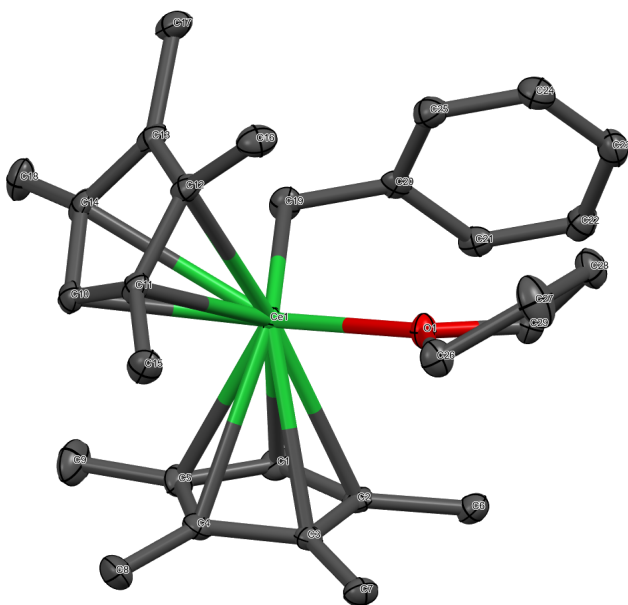

**Figure S126.** ORTEP diagram of **6-Ce**. Ellipsoids shown at 50% probability, lattice solvent, disorder and hydrogen atoms have been omitted for clarity.

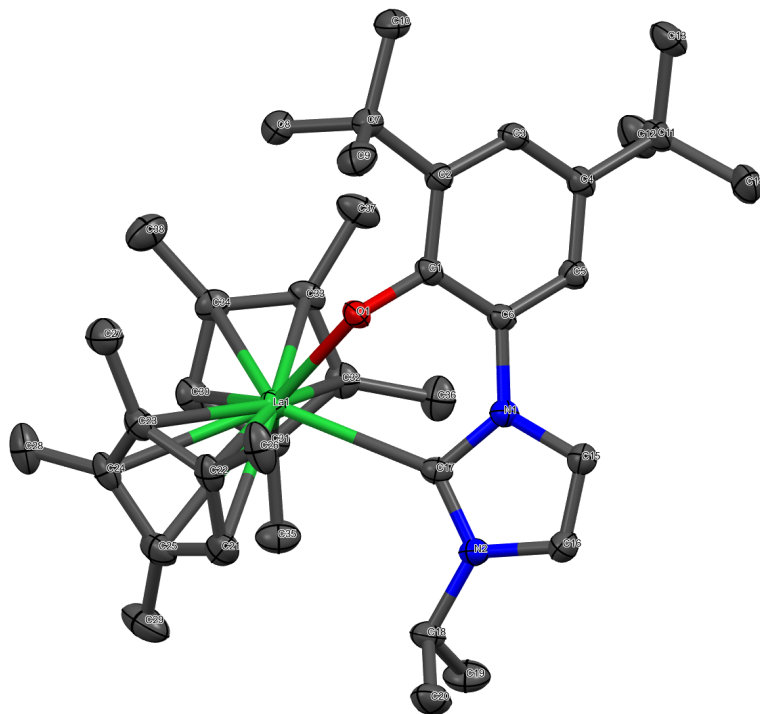

**Figure S127.** ORTEP diagram of **1-La**. Ellipsoids shown at 50% probability, lattice solvent, disorder and hydrogen atoms have been omitted for clarity.

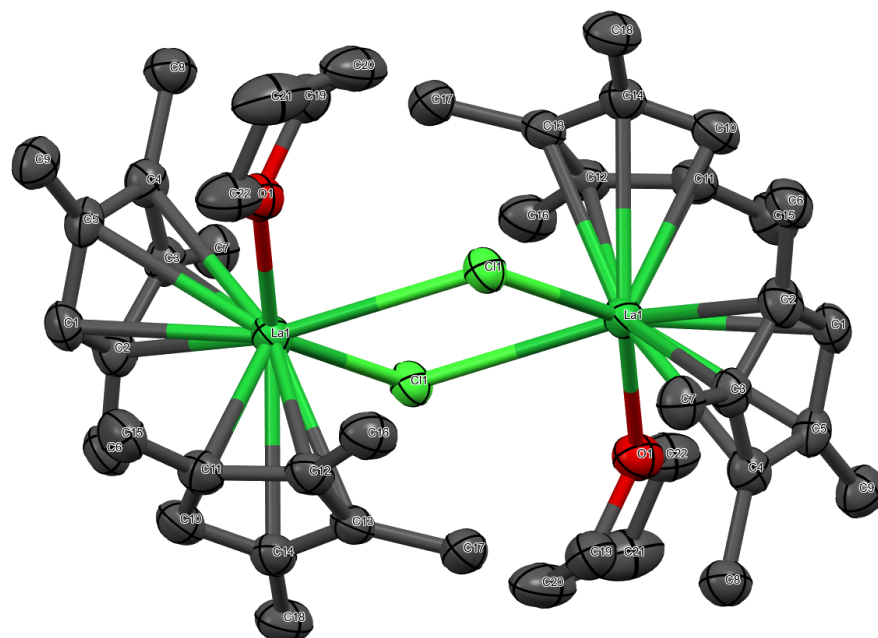

**Figure S128.** ORTEP diagram of **3-La**. Ellipsoids shown at 50% probability, lattice solvent, disorder and hydrogen atoms have been omitted for clarity.

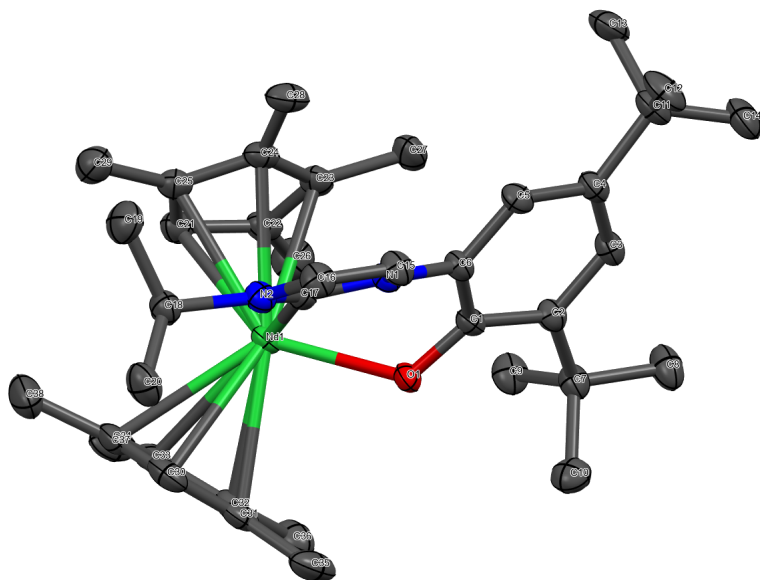

**Figure S129.** ORTEP diagram of **1-Nd**. Ellipsoids shown at 50% probability, lattice solvent, disorder and hydrogen atoms have been omitted for clarity.

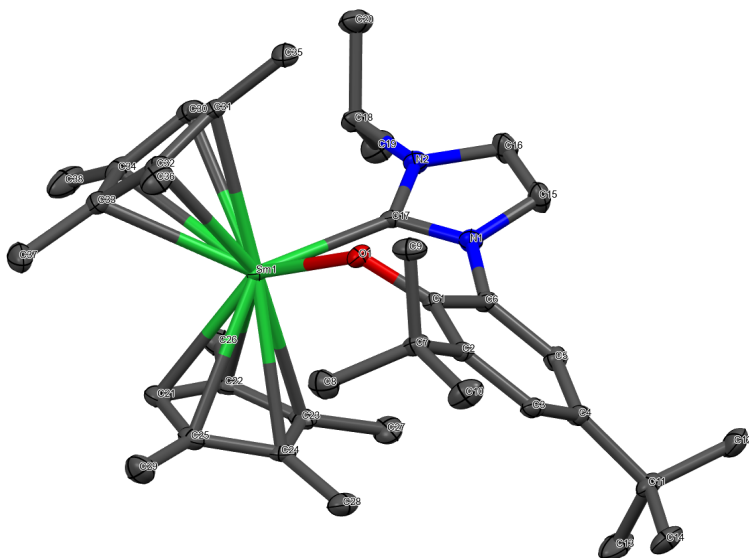

**Figure S130.** ORTEP diagram of **1-Sm**. Ellipsoids shown at 50% probability, lattice solvent, disorder and hydrogen atoms have been omitted for clarity.

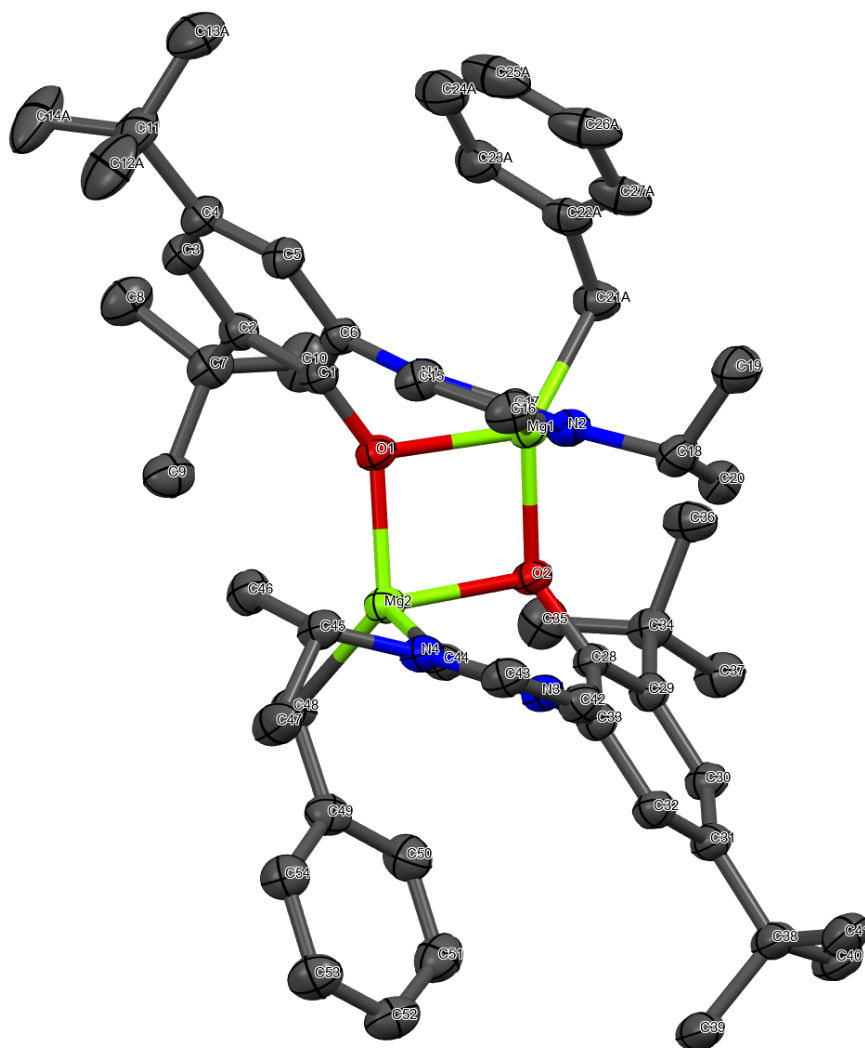

**Figure 131.** ORTEP diagram of **7-Mg**. Ellipsoids shown at 50% probability, lattice solvent, disorder and hydrogen atoms have been omitted for clarity.

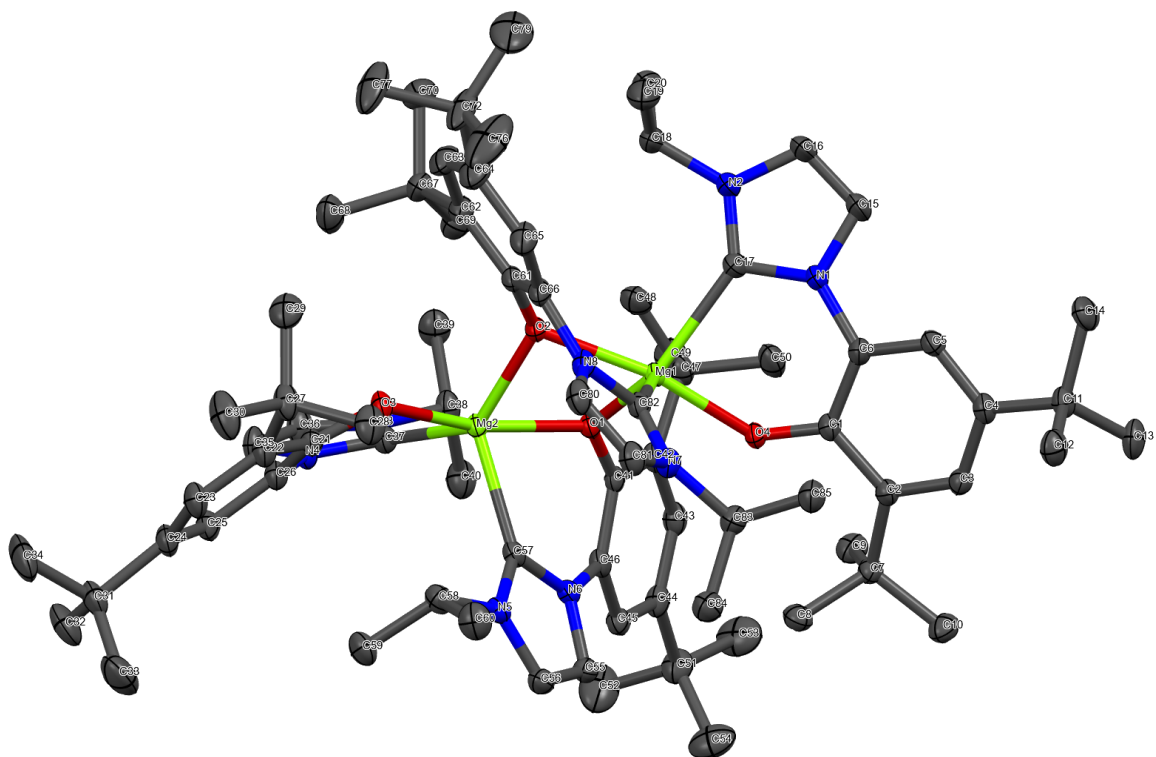

**Figure S132.** ORTEP diagram of **8-Mg**. Ellipsoids shown at 50% probability, lattice solvent, disorder and hydrogen atoms have been omitted for clarity.

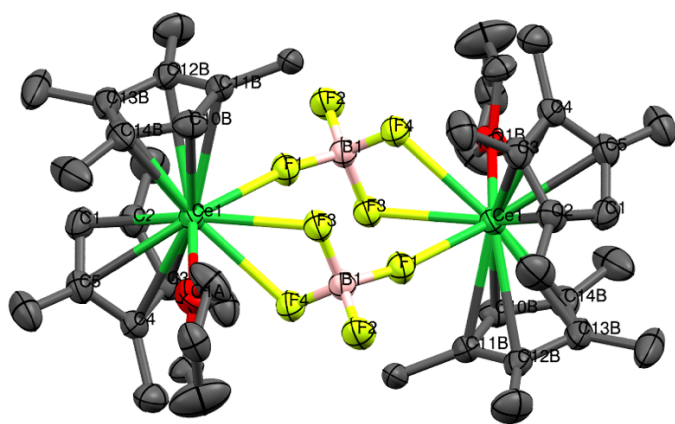

**Figure S133.** ORTEP diagram of  $[(\text{Cp}^{\text{Me}_4})_2\text{Ce}(\text{BF}_4)(\text{THF})]_2$ . Ellipsoids shown at 50% probability, lattice solvent, disorder and hydrogen atoms have been omitted for clarity.

S9.2 Crystallographic data tables

**Table S7.** Crystal data and structure refinement for **1-Ce**, **3-Ce**, **4-Ce**.

|                                             | <b>1-Ce</b>                                                   | <b>3-Ce</b>                                                     | <b>4-Ce</b>                                                   |
|---------------------------------------------|---------------------------------------------------------------|-----------------------------------------------------------------|---------------------------------------------------------------|
| Empirical formula                           | C <sub>38</sub> H <sub>55</sub> CeN <sub>2</sub> O            | C <sub>36</sub> H <sub>52</sub> Ce <sub>2</sub> Cl <sub>2</sub> | C <sub>33</sub> H <sub>49</sub> CeO                           |
| Formula weight                              | 1391.91                                                       | 417.96                                                          | 601.84                                                        |
| Temperature/K                               | 293(2)                                                        | 100                                                             | 100.00(10)                                                    |
| Crystal system                              | monoclinic                                                    | monoclinic                                                      | triclinic                                                     |
| Space group                                 | P2 <sub>1</sub> /n                                            | P2 <sub>1</sub> /n                                              | P-1                                                           |
| a/Å                                         | 10.66730(10)                                                  | 8.5165(4)                                                       | 9.63360(10)                                                   |
| b/Å                                         | 17.46410(10)                                                  | 10.4652(4)                                                      | 10.07670(10)                                                  |
| c/Å                                         | 19.30400(10)                                                  | 19.4321(8)                                                      | 16.3047(2)                                                    |
| α/°                                         | 90                                                            | 90                                                              | 93.2430(10)                                                   |
| β/°                                         | 89.9070(10)                                                   | 92.0320(10)                                                     | 90.3960(10)                                                   |
| γ/°                                         | 90                                                            | 90                                                              | 107.6780(10)                                                  |
| Volume/Å <sup>3</sup>                       | 3596.23(4)                                                    | 1730.83(13)                                                     | 1505.14(3)                                                    |
| Z                                           | 4                                                             | 2                                                               | 2                                                             |
| ρ <sub>calc</sub> /cm <sup>3</sup>          | 1.285                                                         | 1.604                                                           | 1.328                                                         |
| μ/mm <sup>-1</sup>                          | 1.295                                                         | 2.943                                                           | 1.534                                                         |
| F(000)                                      | 1452.0                                                        | 836.0                                                           | 626.0                                                         |
| Crystal size/mm <sup>3</sup>                | 0.351 × 0.251 × 0.164                                         | 0.07 × 0.055 × 0.03                                             | 0.21 × 0.1 × 0.07                                             |
| Radiation                                   | Mo Kα (λ = 0.71073)                                           | synchrotron (λ = 0.7288)                                        | Mo Kα (λ = 0.71073)                                           |
| 2θ range for data collection/°              | 6.748 to 52.744                                               | 4.302 to 55.738                                                 | 4.25 to 62.182                                                |
| Index ranges                                | -13 ≤ h ≤ 13, -21 ≤ k ≤ 21, -24 ≤ l ≤ 24                      | -10 ≤ h ≤ 10, -13 ≤ k ≤ 13, -24 ≤ l ≤ 24                        | -13 ≤ h ≤ 13, -14 ≤ k ≤ 23                                    |
| Reflections collected                       | 72839                                                         | 22581                                                           | 67296                                                         |
| Independent reflections                     | 7352 [R <sub>int</sub> = 0.0362, R <sub>sigma</sub> = 0.0180] | 3819 [R <sub>int</sub> = 0.1107, R <sub>sigma</sub> = 0.0729]   | 8291 [R <sub>int</sub> = 0.0451, R <sub>sigma</sub> = 0.0277] |
| Data/restraints/parameters                  | 7352/0/395                                                    | 3819/0/190                                                      | 8291/0/331                                                    |
| Goodness-of-fit on F <sup>2</sup>           | 1.061                                                         | 1.068                                                           | 1.052                                                         |
| Final R indexes [I >= 2σ (I)]               | R <sub>1</sub> = 0.0190, wR <sub>2</sub> = 0.0434             | R <sub>1</sub> = 0.0490, wR <sub>2</sub> = 0.1212               | R <sub>1</sub> = 0.0205, wR <sub>2</sub> = 0.0438             |
| Final R indexes [all data]                  | R <sub>1</sub> = 0.0232, wR <sub>2</sub> = 0.0453             | R <sub>1</sub> = 0.0514, wR <sub>2</sub> = 0.1239               | R <sub>1</sub> = 0.0240, wR <sub>2</sub> = 0.0447             |
| Largest diff. peak/hole / e Å <sup>-3</sup> | 0.34/-0.34                                                    | 1.16/-1.38                                                      | 0.91/-0.50                                                    |

**Table S7 Continued.** Crystal data and structure refinement for **5-Ce**, **6-Ce**, **1-La**.

|                                             | <b>5-Ce</b>                                                   | <b>6-Ce</b>                                                   | <b>1-La</b>                                                   |
|---------------------------------------------|---------------------------------------------------------------|---------------------------------------------------------------|---------------------------------------------------------------|
| Empirical formula                           | C <sub>23</sub> H <sub>34</sub> CeF <sub>3</sub> OS           | C <sub>29</sub> H <sub>41</sub> CeO                           | C <sub>45</sub> H <sub>63</sub> LaN <sub>2</sub> O            |
| Formula weight                              | 150.92                                                        | 545.74                                                        | 786.88                                                        |
| Temperature/K                               | 99.99(11)                                                     | 293(2)                                                        | 100.01(10)                                                    |
| Crystal system                              | monoclinic                                                    | monoclinic                                                    | monoclinic                                                    |
| Space group                                 | la                                                            | P2 <sub>1</sub> /c                                            | P2 <sub>1</sub> /c                                            |
| a/Å                                         | 17.5622(3)                                                    | 16.2557(2)                                                    | 13.30050(10)                                                  |
| b/Å                                         | 9.40990(10)                                                   | 8.82900(10)                                                   | 22.02780(10)                                                  |
| c/Å                                         | 16.2878(3)                                                    | 18.3743(2)                                                    | 15.63480(10)                                                  |
| α/°                                         | 90                                                            | 90                                                            | 90                                                            |
| β/°                                         | 108.821(2)                                                    | 105.1410(10)                                                  | 113.5670(10)                                                  |
| γ/°                                         | 90                                                            | 90                                                            | 90                                                            |
| Volume/Å <sup>3</sup>                       | 2547.78(8)                                                    | 2545.56(5)                                                    | 4198.63(5)                                                    |
| Z                                           | 4                                                             | 4                                                             | 4                                                             |
| ρ <sub>calc</sub> /cm <sup>3</sup>          | 1.574                                                         | 1.424                                                         | 1.245                                                         |
| μ/mm <sup>-1</sup>                          | 1.916                                                         | 1.806                                                         | 8.101                                                         |
| F(000)                                      | 1220.0                                                        | 1124.0                                                        | 1648.0                                                        |
| Crystal size/mm <sup>3</sup>                | 0.374 × 0.263 × 0.203                                         | 0.306 × 0.217 × 0.096                                         | 0.154 × 0.133 × 0.093                                         |
| Radiation                                   | Mo Kα (λ = 0.71073)                                           | MoKα (λ = 0.71073)                                            | Cu Kα (λ = 1.54184)                                           |
| 2θ range for data collection/°              | 4.9 to 61.74                                                  | 4.594 to 61.904                                               | 7.252 to 154.87                                               |
| Index ranges                                | -22 ≤ h ≤ 24, -13 ≤ k ≤ 13, -23 ≤ l ≤ 22                      | -22 ≤ h ≤ 22, -12 ≤ k ≤ 12, -24 ≤ l ≤ 26                      | -16 ≤ h ≤ 15, -27 ≤ k ≤ 27, -19 ≤ l ≤ 19                      |
| Reflections collected                       | 28412                                                         | 57712                                                         | 163711                                                        |
| Independent reflections                     | 6338 [R <sub>int</sub> = 0.0752, R <sub>sigma</sub> = 0.0465] | 7165 [R <sub>int</sub> = 0.0350, R <sub>sigma</sub> = 0.0217] | 8870 [R <sub>int</sub> = 0.0535, R <sub>sigma</sub> = 0.0171] |
| Data/restraints/parameters                  | 6338/2/297                                                    | 7165/0/288                                                    | 8870/289/524                                                  |
| Goodness-of-fit on F <sup>2</sup>           | 0.928                                                         | 1.057                                                         | 1.069                                                         |
| Final R indexes [I >= 2σ (I)]               | R <sub>1</sub> = 0.0413, wR <sub>2</sub> = 0.1179             | R <sub>1</sub> = 0.0183, wR <sub>2</sub> = 0.0399             | R <sub>1</sub> = 0.0214, wR <sub>2</sub> = 0.0545             |
| Final R indexes [all data]                  | R <sub>1</sub> = 0.0432, wR <sub>2</sub> = 0.1200             | R <sub>1</sub> = 0.0216, wR <sub>2</sub> = 0.0407             | R <sub>1</sub> = 0.0226, wR <sub>2</sub> = 0.0551             |
| Largest diff. peak/hole / e Å <sup>-3</sup> | 0.91/-1.34                                                    | 0.49/-0.36                                                    | 0.43/-0.53                                                    |

**Table S7 Continued.** Crystal data and structure refinement for **3-La**, **1-Nd**, **1-Sm**.

|                                             | <b>3-La</b>                                                      | <b>1-Nd</b>                                                   | <b>1-Sm</b>                                                   |
|---------------------------------------------|------------------------------------------------------------------|---------------------------------------------------------------|---------------------------------------------------------------|
| Empirical formula                           | C <sub>44</sub> H <sub>68</sub> Cl <sub>2</sub> LaO <sub>2</sub> | C <sub>45</sub> H <sub>63</sub> N <sub>2</sub> NdO            | C <sub>38</sub> H <sub>55</sub> N <sub>2</sub> OSm            |
| Formula weight                              | 244.42                                                           | 792.21                                                        | 706.19                                                        |
| Temperature/K                               | 99.99(14)                                                        | 100.00(13)                                                    | 100.00(11)                                                    |
| Crystal system                              | monoclinic                                                       | monoclinic                                                    | monoclinic                                                    |
| Space group                                 | P2 <sub>1</sub> /n                                               | P2 <sub>1</sub> /c                                            | P2 <sub>1</sub> /n                                            |
| a/Å                                         | 11.3760(4)                                                       | 13.1816(2)                                                    | 10.68690(5)                                                   |
| b/Å                                         | 15.3980(7)                                                       | 22.1050(2)                                                    | 17.26346(8)                                                   |
| c/Å                                         | 12.4103(4)                                                       | 15.5529(2)                                                    | 19.16251(8)                                                   |
| α/°                                         | 90                                                               | 90                                                            | 90                                                            |
| β/°                                         | 91.155(3)                                                        | 112.9380(10)                                                  | 90.4636(4)                                                    |
| γ/°                                         | 90                                                               | 90                                                            | 90                                                            |
| Volume/Å <sup>3</sup>                       | 2173.44(14)                                                      | 4173.45(10)                                                   | 3535.23(3)                                                    |
| Z                                           | 2                                                                | 4                                                             | 4                                                             |
| ρ <sub>calc</sub> /cm <sup>3</sup>          | 1.494                                                            | 1.261                                                         | 1.327                                                         |
| μ/mm <sup>-1</sup>                          | 16.351                                                           | 9.732                                                         | 12.684                                                        |
| F(000)                                      | 992.0                                                            | 1660.0                                                        | 1468.0                                                        |
| Crystal size/mm <sup>3</sup>                | 0.104 × 0.07 × 0.031                                             | 0.096 × 0.08 × 0.027                                          | 0.2 × 0.11 × 0.07                                             |
| Radiation                                   | Cu Kα (λ = 1.54184)                                              | Cu Kα (λ = 1.54184)                                           | Cu Kα (λ = 1.54184)                                           |
| 2θ range for data collection/°              | 9.154 to 148.996                                                 | 7.282 to 155.594                                              | 6.892 to 148.996                                              |
| Index ranges                                | -14 ≤ h ≤ 14, -19 ≤ k ≤ 18, -15 ≤ l ≤ 15                         | -16 ≤ h ≤ 16, -27 ≤ k ≤ 26, 18 ≤ l ≤ 19                       | -13 ≤ h ≤ 13, -21 ≤ k ≤ 20, -23 ≤ l ≤ 23                      |
| Reflections collected                       | 40521                                                            | 85278                                                         | 136174                                                        |
| Independent reflections                     | 4453 [R <sub>int</sub> = 0.1585, R <sub>sigma</sub> = 0.0559]    | 8821 [R <sub>int</sub> = 0.0540, R <sub>sigma</sub> = 0.0253] | 7240 [R <sub>int</sub> = 0.0781, R <sub>sigma</sub> = 0.0211] |
| Data/restraints/parameters                  | 4453/0/234                                                       | 8821/105/524                                                  | 7240/0/395                                                    |
| Goodness-of-fit on F <sup>2</sup>           | 1.131                                                            | 1.103                                                         | 1.055                                                         |
| Final R indexes [I > 2σ (I)]                | R <sub>1</sub> = 0.0559, wR <sub>2</sub> = 0.1350                | R <sub>1</sub> = 0.0334, wR <sub>2</sub> = 0.0779             | R <sub>1</sub> = 0.0225, wR <sub>2</sub> = 0.0559             |
| Final R indexes [all data]                  | R <sub>1</sub> = 0.0712, wR <sub>2</sub> = 0.1428                | R <sub>1</sub> = 0.0369, wR <sub>2</sub> = 0.0795             | R <sub>1</sub> = 0.0232, wR <sub>2</sub> = 0.0563             |
| Largest diff. peak/hole / e Å <sup>-3</sup> | 1.06/-1.55                                                       | 0.59/-1.31                                                    | 0.53/-0.96                                                    |



**Table S7 Continued.** Crystal data and structure refinement for **7-Mg**, **8-Mg** and  $[(\text{Cp}^{\text{Me4}})_2\text{Ce}(\text{BF}_4)(\text{THF})]_2$ .

|                                                | <b>7-Mg</b>                                                    | <b>8-Mg</b>                                                    | $[(\text{Cp}^{\text{Me4}})_2\text{Ce}(\text{BF}_4)(\text{THF})]_2$    |
|------------------------------------------------|----------------------------------------------------------------|----------------------------------------------------------------|-----------------------------------------------------------------------|
| Empirical formula                              | $\text{C}_{57.5}\text{H}_{76}\text{Mg}_2\text{N}_4\text{O}_2$  | $\text{C}_{92}\text{H}_{142}\text{Mg}_2\text{N}_8\text{O}_4$   | $\text{C}_{51}\text{H}_{76}\text{B}_2\text{Ce}_2\text{F}_8\text{O}_2$ |
| Formula weight                                 | 903.84                                                         | 1472.75                                                        | 1174.97                                                               |
| Temperature/K                                  | 99.99(13)                                                      | 100.00(11)                                                     | 100.01 (11)                                                           |
| Crystal system                                 | monoclinic                                                     | triclinic                                                      | triclinic                                                             |
| Space group                                    | $P2_1/n$                                                       | P-1                                                            | P-1                                                                   |
| a/Å                                            | 13.1713(2)                                                     | 13.91760(10)                                                   | 8.8809(2)                                                             |
| b/Å                                            | 18.0503(2)                                                     | 17.0140(3)                                                     | 10.2164(2)                                                            |
| c/Å                                            | 23.2076(4)                                                     | 19.2571(3)                                                     | 15.0376(3)                                                            |
| $\alpha/^\circ$                                | 90                                                             | 99.0740(10)                                                    | 94.808(2)                                                             |
| $\beta/^\circ$                                 | 104.996(2)                                                     | 98.3570(10)                                                    | 103.253(2)                                                            |
| $\gamma/^\circ$                                | 90                                                             | 91.4750(10)                                                    | 105.252(2)                                                            |
| Volume/Å <sup>3</sup>                          | 5329.61(14)                                                    | 4449.56(11)                                                    | 1266.08(5)                                                            |
| Z                                              | 4                                                              | 2                                                              | 1                                                                     |
| $\rho_{\text{calc}}/\text{cm}^3$               | 1.126                                                          | 1.099                                                          | 1.541                                                                 |
| $\mu/\text{mm}^{-1}$                           | 0.731                                                          | 0.638                                                          | 1.842                                                                 |
| F(000)                                         | 1956.0                                                         | 1612.0                                                         | 596.0                                                                 |
| Crystal size/mm <sup>3</sup>                   | 0.2 × 0.18 × 0.14                                              | 0.164 × 0.149 × 0.09                                           | 0.312 × 0.209 × 0.188                                                 |
| Radiation                                      | Cu K $\alpha$ ( $\lambda = 1.54184$ )                          | Cu K $\alpha$ ( $\lambda = 1.54184$ )                          | Mo K $\alpha$ ( $\lambda = 0.71073$ )                                 |
| 2 $\theta$ range for data collection/ $^\circ$ | 6.286 to 154.828                                               | 5.266 to 148.996                                               | 4.182 to 62.112                                                       |
| Index ranges                                   | $-16 \leq h \leq 16, -22 \leq k \leq 15, -29 \leq l \leq 29$   | $-17 \leq h \leq 15, -21 \leq k \leq 24, -23 \leq l \leq 24$   | $-12 \leq h \leq 12, -13 \leq k \leq 14, -19 \leq l \leq 20$          |
| Reflections collected                          | 104258                                                         | 91809                                                          | 268653                                                                |
| Independent reflections                        | 11176 [ $R_{\text{int}} = 0.0709, R_{\text{sigma}} = 0.0316$ ] | 18131 [ $R_{\text{int}} = 0.0443, R_{\text{sigma}} = 0.0330$ ] | 6635 [ $R_{\text{int}} = 0.0920, R_{\text{sigma}} = 0.0632$ ]         |
| Data/restraints/parameters                     | 11176/524/699                                                  | 18131/284/1077                                                 | 6635/646/454                                                          |
| Goodness-of-fit on $F^2$                       | 1.022                                                          | 1.045                                                          | 0.978                                                                 |
| Final R indexes [ $ I  \geq 2\sigma(I)$ ]      | $R_1 = 0.0598, wR_2 = 0.1611$                                  | $R_1 = 0.0494, wR_2 = 0.1188$                                  | $R_1 = 0.0337, wR_2 = 0.0712$                                         |
| Final R indexes [all data]                     | $R_1 = 0.0708, wR_2 = 0.1696$                                  | $R_1 = 0.0585, wR_2 = 0.1238$                                  | $R_1 = 0.0396, wR_2 = 0.0746$                                         |
| Largest diff. peak/hole / e Å <sup>-3</sup>    | 0.84/-0.41                                                     | 0.50/-0.34                                                     | 0.60/-1.01                                                            |

## **S10 Computational Details**

All the structures reported in this study were fully optimized with the Becke's 3-parameter hybrid functional<sup>18</sup> combined with the non-local correlation functional provided by Perdew/Wang (denoted as B3PW91).<sup>19</sup> The basis set used for lanthanum and cerium atom were the Stuttgart-Dresden small core ECP in combination with its adapted basis set.<sup>20</sup> For the Mg atom a 6-311++G(d,p) basis set was used whereas for all the other atoms a 6-31G(d,p) basis set was set.<sup>21</sup> In all computations no constraints were imposed on the geometry. All stationary points have been identified for minimum (number of imaginary frequencies  $N_{\text{imag}}=0$ ). The vibrational modes and the corresponding frequencies are based on a harmonic force field. Gibbs Free energies were obtained at  $T=298.15\text{K}$  within the harmonic approximation. GAUSSIAN09 program suite was used in all calculations.<sup>22</sup> The UV-Visible spectra were simulated at the TDDFT level using the same functional.

The computational strategy and especially the use of the B3PW91 functional was chosen because of its long history in lanthanide computational chemistry. See, for example, *Do f electrons play a role in the lanthanide-ligand bonds? A DFT study of  $\text{Ln}(\text{NR}_2)_3$ ;  $R = \text{H}, \text{SiH}_3$* .<sup>23</sup> This methodology has also previously been successfully applied in C-F activation reactions of both alkanes and alkenes.<sup>24,25</sup>

## S10.1 Atomic Orbital Compositions

**Table S8.** Atomic orbital composition of **1-Ce LUMO+1**.

Orbital: 170 Energy(a.u.): -0.01306916 Occ: 0.00000000 Type: Alpha

|                         |                        |                        |                        |
|-------------------------|------------------------|------------------------|------------------------|
| Atom 1(Ce) : 80.486521% | Atom 26(C) : 0.702710% | Atom 51(H) : 0.026905% | Atom 76(H) : 0.000981% |
| Atom 2(O) : 0.767145%   | Atom 27(H) : 0.490512% | Atom 52(C) : 0.008751% | Atom 77(H) : 0.001556% |
| Atom 3(N) : 0.659114%   | Atom 28(C) : 0.224297% | Atom 53(H) : 0.001165% | Atom 78(C) : 0.000613% |
| Atom 4(N) : 0.593343%   | Atom 29(H) : 0.033465% | Atom 54(H) : 0.001267% | Atom 79(H) : 0.000099% |
| Atom 5(C) : 1.245663%   | Atom 30(H) : 0.233137% | Atom 55(H) : 0.000557% | Atom 80(H) : 0.000197% |
| Atom 6(C) : 0.514240%   | Atom 31(H) : 0.045209% | Atom 56(C) : 0.116490% | Atom 81(H) : 0.000085% |
| Atom 7(C) : 0.542150%   | Atom 32(C) : 0.772335% | Atom 57(H) : 0.011128% | Atom 82(C) : 0.227500% |
| Atom 8(C) : 0.241415%   | Atom 33(H) : 0.136632% | Atom 58(C) : 0.086611% | Atom 83(H) : 0.014968% |
| Atom 9(C) : 1.617072%   | Atom 34(H) : 0.801274% | Atom 59(H) : 0.012194% | Atom 84(H) : 0.140785% |
| Atom 10(C) : 0.344298%  | Atom 35(H) : 0.037615% | Atom 60(H) : 0.058862% | Atom 85(H) : 0.082953% |
| Atom 11(C) : 0.396588%  | Atom 36(C) : 0.049397% | Atom 61(H) : 0.033495% | Atom 86(C) : 0.111446% |
| Atom 12(H) : 0.057794%  | Atom 37(H) : 0.004426% | Atom 62(C) : 0.262270% | Atom 87(H) : 0.035052% |
| Atom 13(C) : 1.009403%  | Atom 38(H) : 0.011096% | Atom 63(H) : 0.018164% | Atom 88(H) : 0.106065% |
| Atom 14(H) : 0.067040%  | Atom 39(H) : 0.035610% | Atom 64(H) : 0.311691% | Atom 89(H) : 0.007843% |
| Atom 15(C) : 1.269144%  | Atom 40(C) : 0.025513% | Atom 65(H) : 0.055524% | Atom 90(C) : 0.008234% |
| Atom 16(C) : 2.279342%  | Atom 41(C) : 0.011697% | Atom 66(C) : 0.096658% | Atom 91(H) : 0.000420% |
| Atom 17(C) : 0.304977%  | Atom 42(C) : 0.079666% | Atom 67(H) : 0.039190% | Atom 92(H) : 0.004256% |
| Atom 18(C) : 0.355731%  | Atom 43(H) : 0.019720% | Atom 68(H) : 0.008397% | Atom 93(H) : 0.000222% |
| Atom 19(C) : 0.413715%  | Atom 44(H) : 0.023290% | Atom 69(H) : 0.007724% | Atom 94(C) : 0.008339% |
| Atom 20(C) : 0.041871%  | Atom 45(H) : 0.023605% | Atom 70(C) : 0.167600% | Atom 95(H) : 0.000407% |
| Atom 21(H) : 0.010021%  | Atom 46(C) : 0.136056% | Atom 71(H) : 0.010707% | Atom 96(H) : 0.002005% |
| Atom 22(C) : 0.126799%  | Atom 47(H) : 0.010299% | Atom 72(H) : 0.010239% | Atom 97(H) : 0.000461% |
| Atom 23(H) : 0.004141%  | Atom 48(H) : 0.043220% | Atom 73(H) : 0.095720% |                        |
| Atom 24(C) : 0.060878%  | Atom 49(H) : 0.060438% | Atom 74(C) : 0.012501% |                        |
| Atom 25(C) : 0.143835%  | Atom 50(C) : 0.222430% | Atom 75(H) : 0.005814% |                        |

**Table S9.** Atomic orbital composition of **1-La HOMO**.

Orbital: 167 Energy(a.u.): -0.18025753 Occ: 2.00000000 Type: Alpha&Beta

|              |            |              |           |              |           |               |           |
|--------------|------------|--------------|-----------|--------------|-----------|---------------|-----------|
| Atom 1(O) :  | 5.815632%  | Atom 26(H) : | 0.047942% | Atom 51(C) : | 0.244483% | Atom 76(H) :  | 0.010591% |
| Atom 2(N) :  | 0.426904%  | Atom 27(C) : | 0.565444% | Atom 52(H) : | 0.099074% | Atom 77(C) :  | 0.034744% |
| Atom 3(N) :  | 0.083989%  | Atom 28(H) : | 0.151739% | Atom 53(H) : | 0.027834% | Atom 78(H) :  | 0.011502% |
| Atom 4(C) :  | 9.832815%  | Atom 29(H) : | 0.352462% | Atom 54(H) : | 0.031353% | Atom 79(H) :  | 0.002170% |
| Atom 5(C) :  | 7.166953%  | Atom 30(H) : | 0.088810% | Atom 55(C) : | 0.172370% | Atom 80(H) :  | 0.010346% |
| Atom 6(C) :  | 2.228082%  | Atom 31(C) : | 1.040018% | Atom 56(H) : | 0.017066% | Atom 81(C) :  | 1.729080% |
| Atom 7(C) :  | 2.584318%  | Atom 32(H) : | 0.331449% | Atom 57(C) : | 0.014375% | Atom 82(H) :  | 0.493959% |
| Atom 8(C) :  | 0.295536%  | Atom 33(H) : | 0.657356% | Atom 58(H) : | 0.010392% | Atom 83(H) :  | 1.117699% |
| Atom 9(C) :  | 2.496012%  | Atom 34(H) : | 0.152509% | Atom 59(H) : | 0.002835% | Atom 84(H) :  | 0.254054% |
| Atom 10(C) : | 4.235121%  | Atom 35(C) : | 0.885466% | Atom 60(H) : | 0.006641% | Atom 85(C) :  | 0.119659% |
| Atom 11(H) : | 0.279294%  | Atom 36(H) : | 0.057118% | Atom 61(C) : | 1.399757% | Atom 86(H) :  | 0.029781% |
| Atom 12(C) : | 1.467337%  | Atom 37(H) : | 0.445901% | Atom 62(H) : | 0.203484% | Atom 87(H) :  | 0.024498% |
| Atom 13(H) : | 0.071606%  | Atom 38(H) : | 0.438995% | Atom 63(H) : | 0.880601% | Atom 88(H) :  | 0.018286% |
| Atom 14(C) : | 4.216625%  | Atom 39(C) : | 0.246398% | Atom 64(H) : | 0.400919% | Atom 89(C) :  | 0.249113% |
| Atom 15(C) : | 6.815857%  | Atom 40(C) : | 0.382772% | Atom 65(C) : | 0.009134% | Atom 90(H) :  | 0.020511% |
| Atom 16(C) : | 11.073421% | Atom 41(C) : | 0.253230% | Atom 66(H) : | 0.001142% | Atom 91(H) :  | 0.065595% |
| Atom 17(C) : | 6.606805%  | Atom 42(H) : | 0.031106% | Atom 67(H) : | 0.001649% | Atom 92(H) :  | 0.032192% |
| Atom 18(C) : | 2.653574%  | Atom 43(H) : | 0.101332% | Atom 68(H) : | 0.002538% | Atom 93(C) :  | 0.251025% |
| Atom 19(C) : | 1.063290%  | Atom 44(H) : | 0.146283% | Atom 69(C) : | 0.146306% | Atom 94(H) :  | 0.034423% |
| Atom 20(H) : | 0.056100%  | Atom 45(C) : | 1.027641% | Atom 70(H) : | 0.022964% | Atom 95(H) :  | 0.066393% |
| Atom 21(C) : | 0.928902%  | Atom 46(H) : | 0.111828% | Atom 71(H) : | 0.027643% | Atom 96(H) :  | 0.019558% |
| Atom 22(H) : | 0.051445%  | Atom 47(H) : | 0.641569% | Atom 72(H) : | 0.041729% | Atom 97(La) : | 6.581608% |
| Atom 23(C) : | 2.441680%  | Atom 48(H) : | 0.347475% | Atom 73(C) : | 0.023341% |               |           |
| Atom 24(C) : | 3.496737%  | Atom 49(C) : | 0.098350% | Atom 74(H) : | 0.006157% |               |           |
| Atom 25(C) : | 0.028353%  | Atom 50(H) : | 0.007857% | Atom 75(H) : | 0.001985% |               |           |

**Table S10.** Atomic orbital composition of **1-La** LUMO.

Orbital: 168 Energy(a.u.): -0.01300708 Occ: 0.00000000 Type: Alpha&Beta

|             |           |              |           |              |           |              |           |
|-------------|-----------|--------------|-----------|--------------|-----------|--------------|-----------|
| Atom 1(O) : | 1.394519% | Atom 26(H) : | 0.353756% | Atom 51(C) : | 0.380251% | Atom 76(H) : | 0.020972% |
| Atom 2(N) : | 7.824972% | Atom 27(C) : | 0.498541% | Atom 52(H) : | 0.047768% | Atom 77(C) : | 0.155468% |
| Atom 3(N) : | 6.399520% | Atom 28(H) : | 0.158328% | Atom 53(H) : | 0.132532% | Atom 78(H) : | 0.078599% |
| Atom 4(C) : | 0.199331% | Atom 29(H) : | 0.091341% | Atom 54(H) : | 0.058553% | Atom 79(H) : | 0.019507% |
| Atom 5(C) : | 0.290379% | Atom 30(H) : | 0.436529% | Atom 55(C) : | 1.511509% | Atom 80(H) : | 0.077643% |

|                        |                        |                        |                          |
|------------------------|------------------------|------------------------|--------------------------|
| Atom 6(C) : 0.392803%  | Atom 31(C) : 0.299174% | Atom 56(H) : 0.105796% | Atom 81(C) : 0.083804%   |
| Atom 7(C) : 6.782737%  | Atom 32(H) : 0.286754% | Atom 57(C) : 0.396703% | Atom 82(H) : 0.016107%   |
| Atom 8(C) : 19.122107% | Atom 33(H) : 0.075515% | Atom 58(H) : 0.174866% | Atom 83(H) : 0.042520%   |
| Atom 9(C) : 0.203806%  | Atom 34(H) : 0.040112% | Atom 59(H) : 0.101510% | Atom 84(H) : 0.054469%   |
| Atom 10(C) : 0.285315% | Atom 35(C) : 0.176494% | Atom 60(H) : 0.045236% | Atom 85(C) : 0.071487%   |
| Atom 11(H) : 0.050556% | Atom 36(H) : 0.071912% | Atom 61(C) : 0.068117% | Atom 86(H) : 0.027107%   |
| Atom 12(C) : 0.158494% | Atom 37(H) : 0.051202% | Atom 62(H) : 0.012809% | Atom 87(H) : 0.040427%   |
| Atom 13(H) : 0.015327% | Atom 38(H) : 0.080033% | Atom 63(H) : 0.034908% | Atom 88(H) : 0.012317%   |
| Atom 14(C) : 0.549680% | Atom 39(C) : 0.635866% | Atom 64(H) : 0.029865% | Atom 89(C) : 0.154230%   |
| Atom 15(C) : 0.332750% | Atom 40(C) : 0.231285% | Atom 65(C) : 0.292330% | Atom 90(H) : 0.134661%   |
| Atom 16(C) : 0.268716% | Atom 41(C) : 0.064082% | Atom 66(H) : 0.045241% | Atom 91(H) : 0.027156%   |
| Atom 17(C) : 0.819851% | Atom 42(H) : 0.023560% | Atom 67(H) : 0.141484% | Atom 92(H) : 0.036707%   |
| Atom 18(C) : 2.392169% | Atom 43(H) : 0.016841% | Atom 68(H) : 0.055749% | Atom 93(C) : 0.133389%   |
| Atom 19(C) : 8.380959% | Atom 44(H) : 0.085510% | Atom 69(C) : 0.375602% | Atom 94(H) : 0.041100%   |
| Atom 20(H) : 1.053745% | Atom 45(C) : 0.157409% | Atom 70(H) : 0.064757% | Atom 95(H) : 0.015491%   |
| Atom 21(C) : 7.097858% | Atom 46(H) : 0.015974% | Atom 71(H) : 0.114463% | Atom 96(H) : 0.090734%   |
| Atom 22(H) : 0.778957% | Atom 47(H) : 0.124029% | Atom 72(H) : 0.069470% | Atom 97(La) : 10.556532% |
| Atom 23(C) : 6.052621% | Atom 48(H) : 0.041844% | Atom 73(C) : 0.061581% |                          |
| Atom 24(C) : 2.405474% | Atom 49(C) : 4.965394% | Atom 74(H) : 0.041922% |                          |
| Atom 25(C) : 0.778369% | Atom 50(H) : 0.727921% | Atom 75(H) : 0.006129% |                          |

**Table S11.** Atomic orbital composition of **1-La LUMO+1**.

Orbital: 169 Energy(a.u.): -0.00954429 Occ: 0.00000000 Type: Alpha&Beta

|                        |                        |                        |                        |
|------------------------|------------------------|------------------------|------------------------|
| Atom 1(O) : 2.222657%  | Atom 26(H) : 2.749823% | Atom 51(C) : 0.041628% | Atom 76(H) : 0.018384% |
| Atom 2(N) : 1.301125%  | Atom 27(C) : 0.270996% | Atom 52(H) : 0.043870% | Atom 77(C) : 0.007122% |
| Atom 3(N) : 0.931956%  | Atom 28(H) : 0.082265% | Atom 53(H) : 0.007112% | Atom 78(H) : 0.004065% |
| Atom 4(C) : 2.651875%  | Atom 29(H) : 0.111316% | Atom 54(H) : 0.014405% | Atom 79(H) : 0.000791% |
| Atom 5(C) : 2.171454%  | Atom 30(H) : 0.124062% | Atom 55(C) : 0.235206% | Atom 80(H) : 0.001735% |
| Atom 6(C) : 0.851756%  | Atom 31(C) : 1.537281% | Atom 56(H) : 0.024478% | Atom 81(C) : 0.433850% |
| Atom 7(C) : 1.071948%  | Atom 32(H) : 0.707878% | Atom 57(C) : 0.285040% | Atom 82(H) : 0.054578% |
| Atom 8(C) : 4.526794%  | Atom 33(H) : 0.883305% | Atom 58(H) : 0.100207% | Atom 83(H) : 0.071192% |
| Atom 9(C) : 0.796186%  | Atom 34(H) : 0.274023% | Atom 59(H) : 0.161670% | Atom 84(H) : 0.469738% |
| Atom 10(C) : 1.917369% | Atom 35(C) : 0.329690% | Atom 60(H) : 0.076903% | Atom 85(C) : 0.216950% |

|                        |                        |                        |                          |
|------------------------|------------------------|------------------------|--------------------------|
| Atom 11(H) : 0.620363% | Atom 36(H) : 0.068224% | Atom 61(C) : 1.115239% | Atom 86(H) : 0.214347%   |
| Atom 12(C) : 2.178319% | Atom 37(H) : 0.120551% | Atom 62(H) : 0.150081% | Atom 87(H) : 0.050674%   |
| Atom 13(H) : 0.311961% | Atom 38(H) : 0.175192% | Atom 63(H) : 0.666369% | Atom 88(H) : 0.034596%   |
| Atom 14(C) : 1.222469% | Atom 39(C) : 0.112427% | Atom 64(H) : 0.598299% | Atom 89(C) : 0.053090%   |
| Atom 15(C) : 2.835052% | Atom 40(C) : 0.094220% | Atom 65(C) : 0.232150% | Atom 90(H) : 0.006479%   |
| Atom 16(C) : 1.062440% | Atom 41(C) : 0.209943% | Atom 66(H) : 0.081637% | Atom 91(H) : 0.021093%   |
| Atom 17(C) : 1.683707% | Atom 42(H) : 0.114071% | Atom 67(H) : 0.054467% | Atom 92(H) : 0.007861%   |
| Atom 18(C) : 1.544879% | Atom 43(H) : 0.042615% | Atom 68(H) : 0.063926% | Atom 93(C) : 0.054788%   |
| Atom 19(C) : 0.273493% | Atom 44(H) : 0.057266% | Atom 69(C) : 0.595920% | Atom 94(H) : 0.012237%   |
| Atom 20(H) : 0.052909% | Atom 45(C) : 1.033217% | Atom 70(H) : 0.088903% | Atom 95(H) : 0.015251%   |
| Atom 21(C) : 0.665069% | Atom 46(H) : 0.157251% | Atom 71(H) : 0.070751% | Atom 96(H) : 0.006707%   |
| Atom 22(H) : 0.071330% | Atom 47(H) : 0.479095% | Atom 72(H) : 1.360706% | Atom 97(La) : 46.979059% |
| Atom 23(C) : 0.364142% | Atom 48(H) : 0.659988% | Atom 73(C) : 0.053086% |                          |
| Atom 24(C) : 0.770150% | Atom 49(C) : 0.691785% | Atom 74(H) : 0.026349% |                          |
| Atom 25(C) : 1.774141% | Atom 50(H) : 0.149378% | Atom 75(H) : 0.007606% |                          |

## S10.2 Excitation energies and orbitals

### S10.2.1 1-Ce

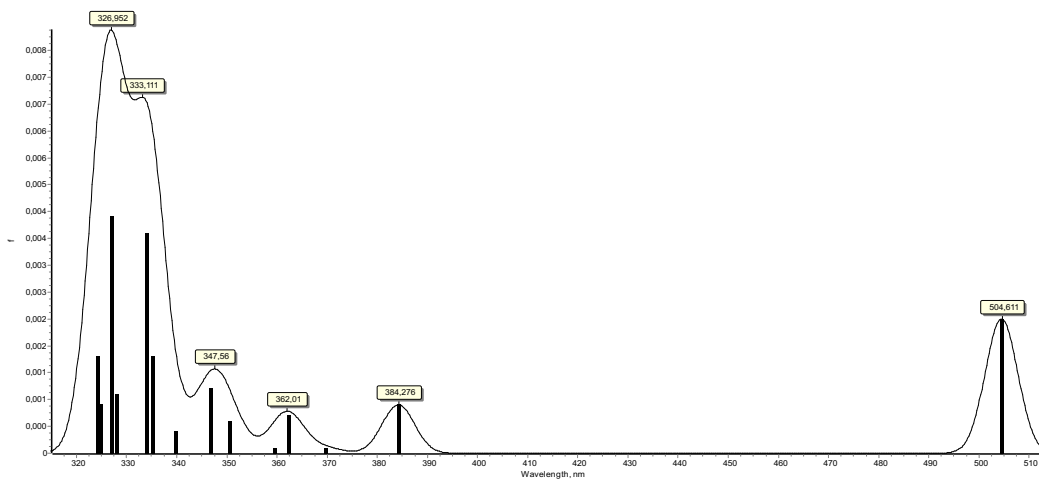

**Figure S134.** Computed UV-Vis spectrum of **1-Ce** using TD-DFT.

Excited State 20: ?Spin -?Sym 3.8240 eV **324.22** nm f=0.0018

163A ->171A 0.16714

164A ->171A 0.11612

166A ->169A 0.16813

|             |          |
|-------------|----------|
| 166A ->170A | 0.28457  |
| 166A ->171A | 0.20839  |
| 166A ->172A | -0.11409 |
| 166A ->174A | -0.11111 |
| 167A ->169A | 0.16496  |
| 167A ->170A | 0.40351  |
| 167A ->171A | 0.16418  |
| 167A ->172A | -0.30275 |
| 167A ->173A | -0.20816 |
| 167A ->174A | -0.18486 |
| 165B ->168B | 0.13047  |
| 166B ->168B | -0.21173 |
| 167B ->168B | -0.21318 |
| 167B ->169B | 0.38086  |
| 167B ->170B | -0.12316 |

Excited State 18: ?Spin -?Sym 3.7911 eV 327.04 nm f=0.0044

|             |          |
|-------------|----------|
| 165A ->171A | 0.12028  |
| 167A ->170A | 0.24950  |
| 167A ->172A | 0.51973  |
| 167A ->173A | -0.10849 |
| 168A ->169A | 0.11586  |
| 168A ->170A | 0.16291  |
| 168A ->171A | -0.13306 |
| 168A ->173A | 0.26813  |
| 168A ->174A | 0.23434  |
| 168A ->176A | -0.37917 |
| 168A ->177A | 0.11200  |
| 168A ->178A | 0.16192  |
| 168A ->179A | -0.16447 |
| 168A ->181A | -0.12607 |
| 168A ->182A | -0.16052 |

168A ->183A 0.11297  
167B ->168B -0.13469  
167B ->169B 0.20933

Excited State 16: ?Spin -?Sym 3.7126 eV 333.96 nm f=0.0041

164A ->169A -0.11337  
164A ->170A 0.10118  
165A ->169A 0.24929  
165A ->171A -0.12914  
166A ->169A -0.16606  
166A ->171A -0.35772  
167A ->169A -0.35650  
167A ->170A -0.15837  
167A ->172A -0.20857  
167A ->174A 0.18640  
164B ->169B -0.12331  
166B ->168B 0.10911  
166B ->169B 0.19163  
167B ->169B 0.59378

Excited State 8: ?Spin -?Sym 3.2271 eV 384.19 nm f=0.0009

168A ->169A 0.60932  
168A ->170A 0.55120  
168A ->171A 0.13697  
168A ->172A -0.10436  
168A ->174A 0.14699  
168A ->175A -0.17407  
168A ->176A 0.31305  
168A ->177A -0.10204  
168A ->179A 0.15739  
168A ->180A -0.24127  
168A ->184A -0.10283

Excited State 7: ?Spin -?Sym 2.4575 eV 504.50 nm f=0.0025



168A ->169A -0.39569  
168A ->170A 0.62899  
168A ->171A 0.23498  
168A ->172A 0.23179  
168A ->174A -0.44046  
168A ->175A 0.15675  
168A ->176A -0.20171  
168A ->178A 0.12712

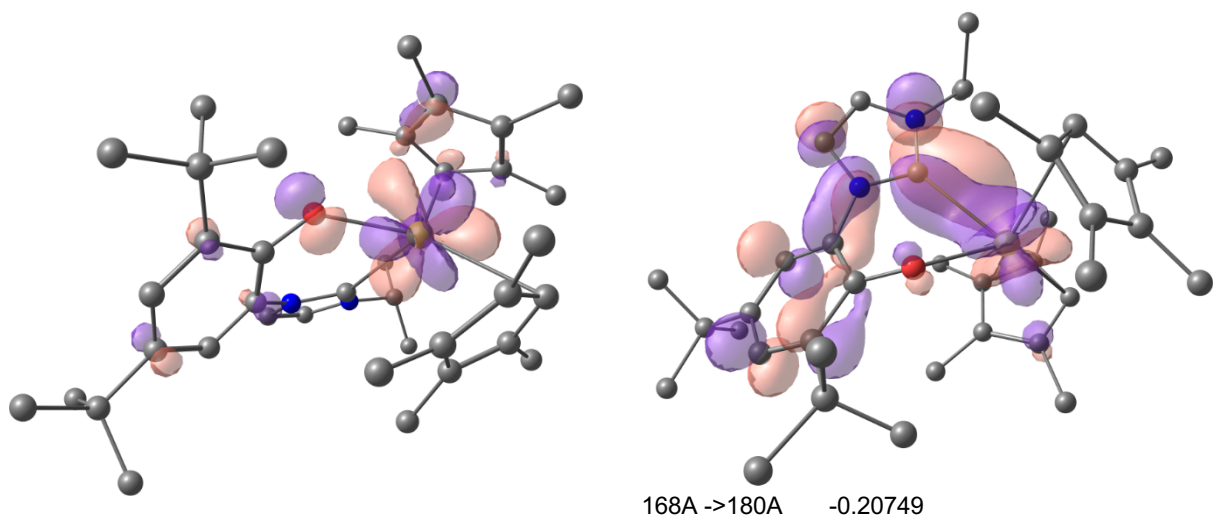

**Figure S135.** Depictions of the TD-DFT-calculated Alpha 168 HOMO (left) and Alpha 169 LUMO (right) orbitals of **1-Ce**.

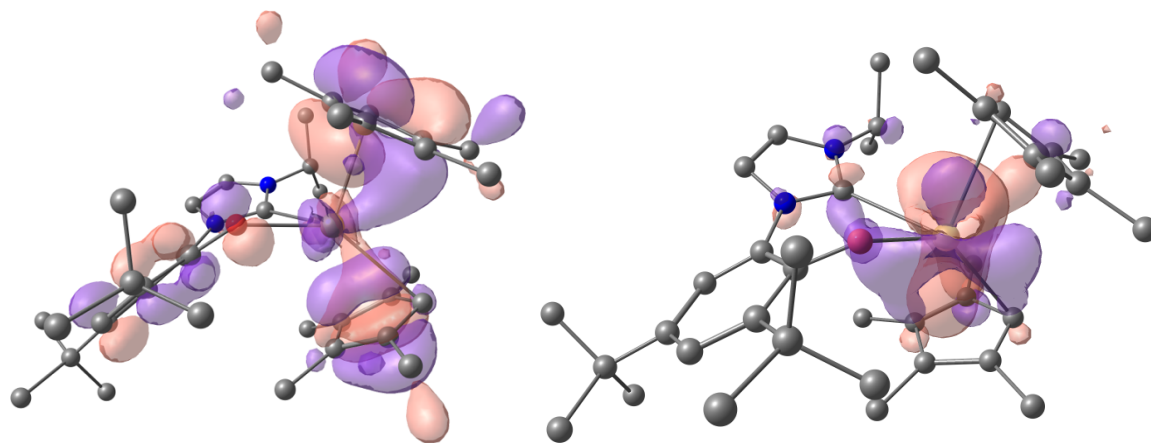

**Figure S136.** Depictions of the TD-DFT-calculated Alpha 167 HOMO-1 (left) and Alpha 170 LUMO+1 (right) orbitals of **1-Ce**.

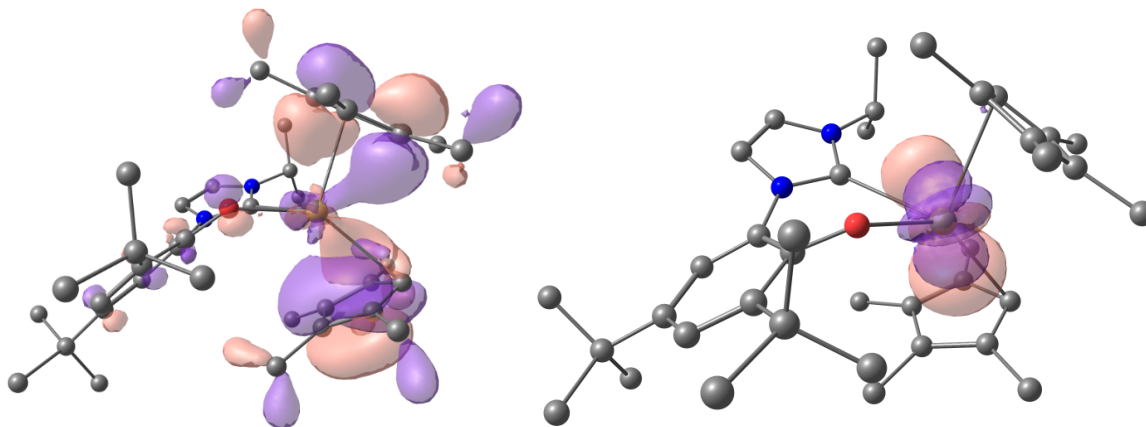

**Figure S137.** Depictions of the TD-DFT-calculated Alpha 166 HOMO-2 (left) and Alpha 171 LUMO+2 (right) orbitals of **1-Ce**.

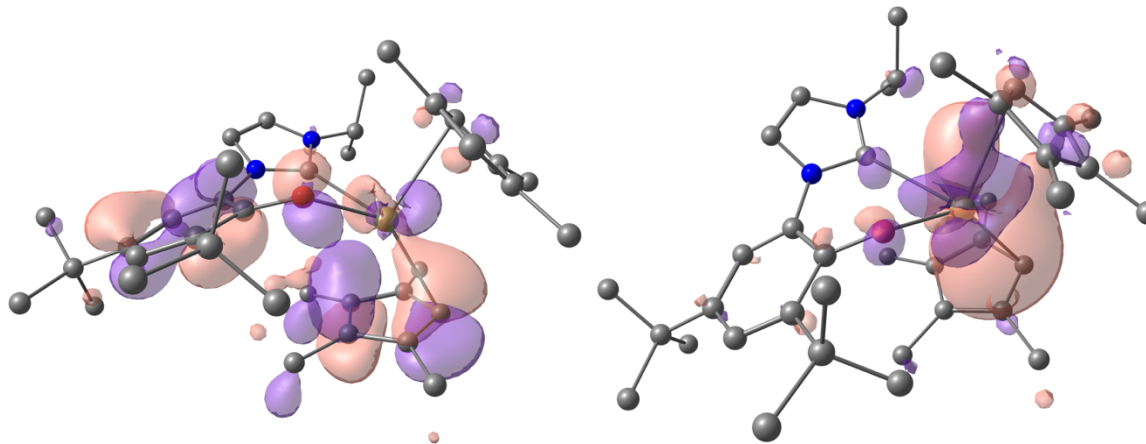

**Figure S138.** Depictions of the TD-DFT-calculated Alpha 165 HOMO-3 (left) and Alpha 172 LUMO+3 (right) orbitals of **1-Ce**.

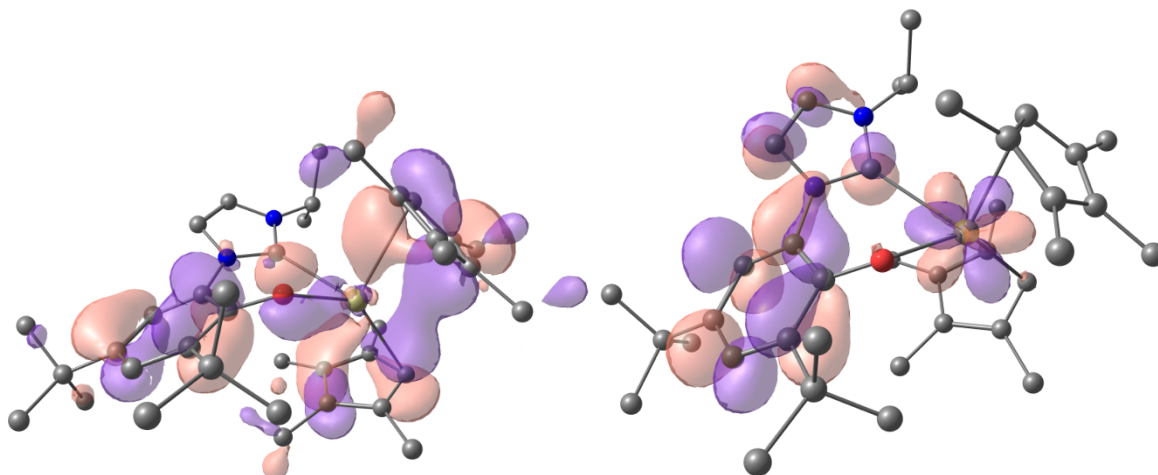

**Figure S139.** Depictions of the TD-DFT-calculated Alpha 164 HOMO-4 (left) and Alpha 173 LUMO+4 (right) orbitals of **1-Ce**.

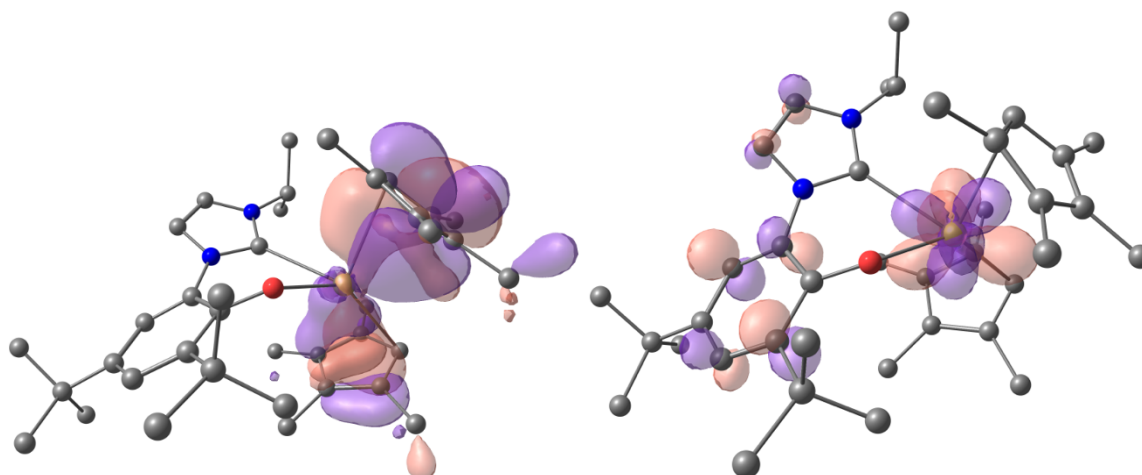

**Figure S140.** Depictions of the TD-DFT-calculated Alpha 163 HOMO-5 (left) and Alpha 174 LUMO+5 (right) orbitals of **1-Ce**.

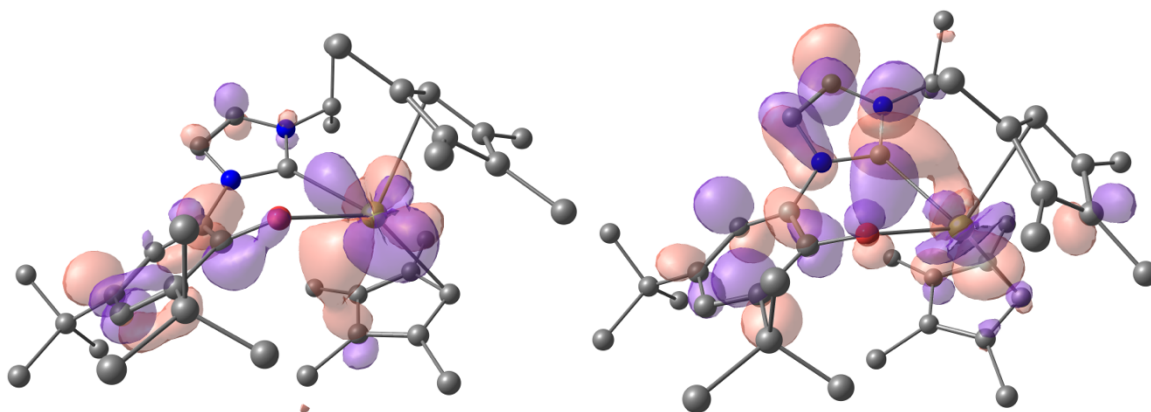

**Figure S141.** Depictions of the TD-DFT-calculated Alpha 175 LUMO+6 (left) and Alpha 176 LUMO+7 (right) orbitals of **1-Ce**.

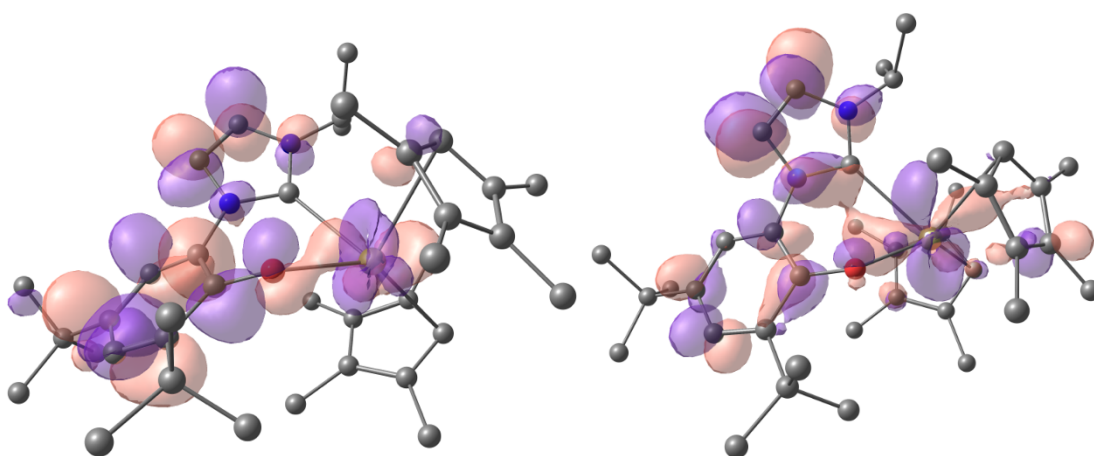

**Figure S142.** Depictions of the TD-DFT-calculated Alpha 177 LUMO+8 (left) and Alpha 178 LUMO+9 (right) orbitals of **1-Ce**.

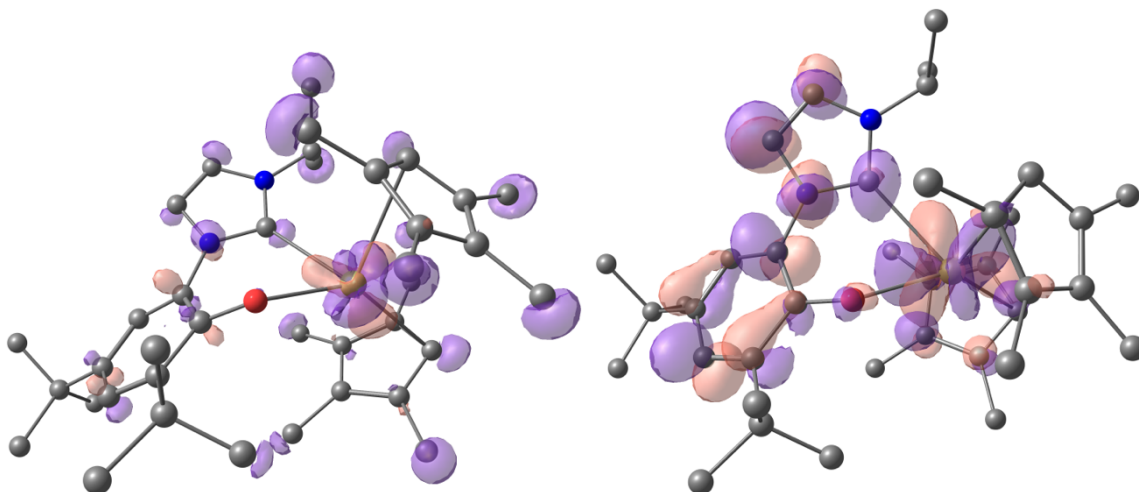

**Figure S143.** Depictions of the TD-DFT-calculated Alpha 179 LUMO+10 (left) and Alpha 180 LUMO+11 (right) orbitals of **1-Ce**.

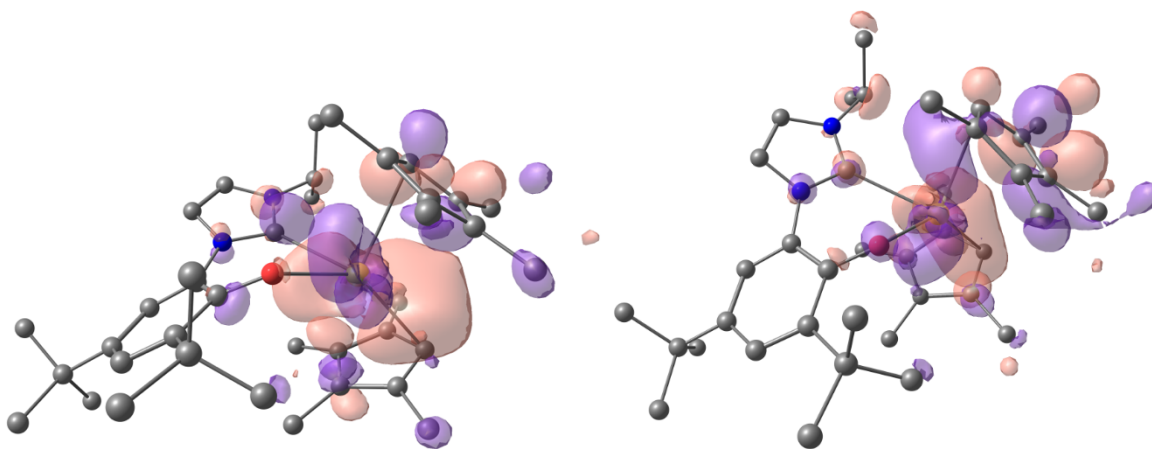

**Figure S144.** Depictions of the TD-DFT-calculated Alpha 181 LUMO+12 (left) and Alpha 182 LUMO+13 (right) orbitals of **1-Ce**.

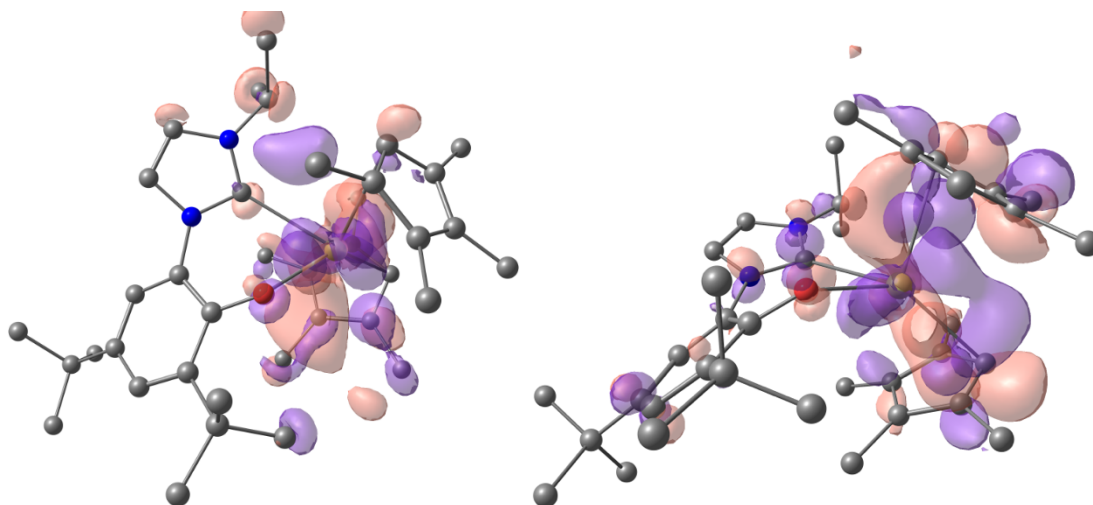

**Figure S145.** Depictions of the TD-DFT-calculated Alpha 183 LUMO+14 (left) and Alpha 184 LUMO+15 (right) orbitals of **1-Ce**.

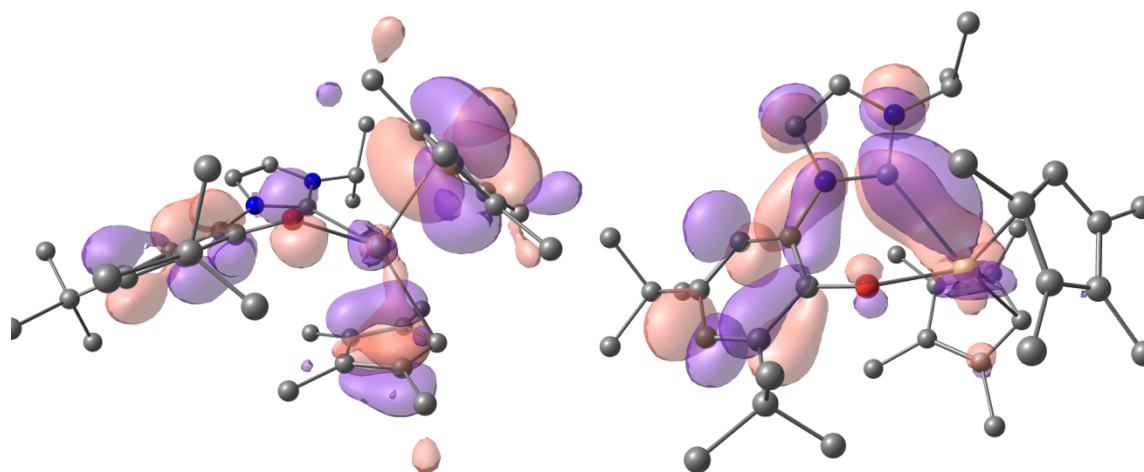

**Figure S146.** Depictions of the TD-DFT-calculated Beta 167 HOMO (left) and Beta 168 LUMO (right) orbitals of **1-Ce**.

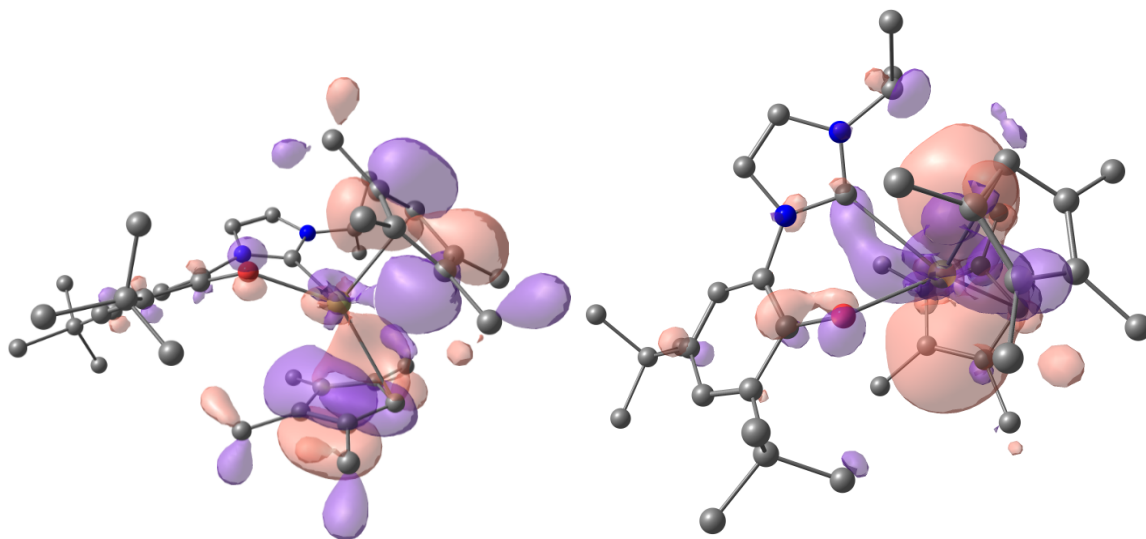

**Figure S147.** Depictions of the TD-DFT-calculated Beta 166 HOMO-1 (left) and Beta 169 LUMO+1 (right) orbitals of **1-Ce**.

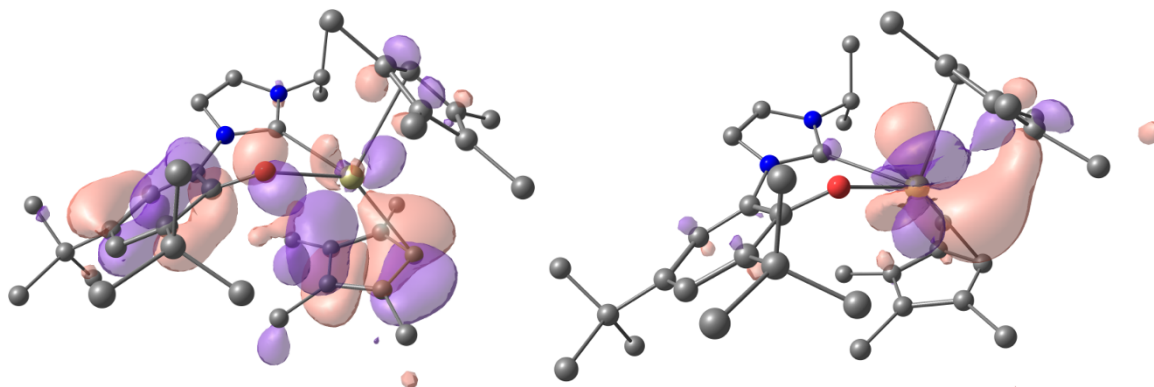

**Figure S148.** Depictions of the TD-DFT-calculated Beta 165 HOMO-2 (left) and Beta 170 LUMO+2 (right) orbitals of **1-Ce**.

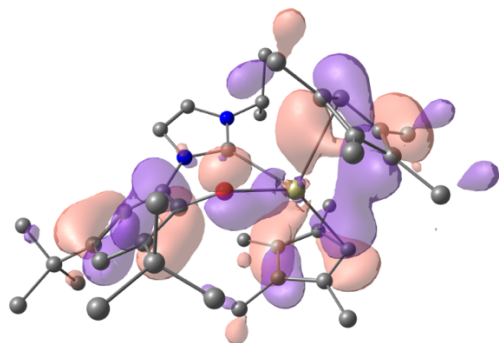

**Figure S149.** Depictions of the TD-DFT-calculated Beta 164 HOMO-3 orbitals of **1-Ce**.

## S9.2.2 1-La

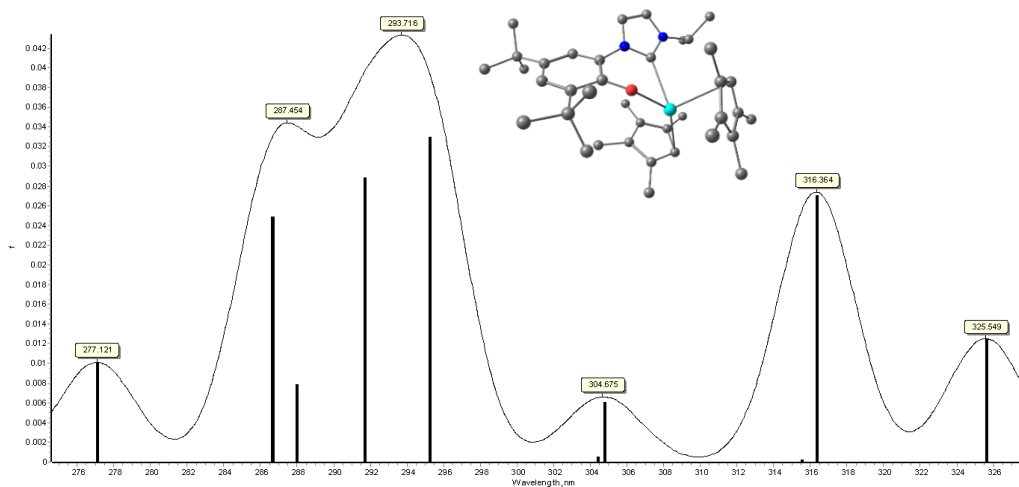

**Figure S150.** Computed UV-Vis spectrum of **1-La** using TD-DFT with a representation of TS1.

Excited State 1: 3.8083 eV **325.56 nm** f=0.0125

167 ->168 0.24967

167 ->169 0.63192

Excited State 2: 3.9194 eV **316.34 nm** f=0.0271

166 ->168 0.16778

166 ->169 0.35055

167 ->168 0.54096

167 ->169 -0.15789

167 ->170 0.10181

Excited State 3: 3.9299 eV 315.49 nm f=0.0003

166 ->168 0.14446

166 ->169 0.53723

167 ->168 -0.33182

167 ->169 0.21312



Excited State 4: 4.0684 eV 304.75 nm f=0.0061

164 ->169 -0.20393

165 ->168 0.19937

165 ->169 0.47323

166 ->168 -0.39603

Excited State 5: 4.0732 eV 304.39 nm f=0.0005

164 ->169 -0.15933

165 ->168 0.17720

165 ->169 0.31526

166 ->168 0.51268

166 ->169 -0.21637

Excited State 6: 4.1997 eV 295.22 nm f=0.0330

165 ->168 0.62632

165 ->169 -0.26908

Excited State 7: 4.2510 eV 291.66 nm f=0.0289

163 ->169 0.34726

164 ->168 0.39379

164 ->169 0.35431

165 ->169 0.19998

167 ->171 0.10110

Excited State 8: 4.3056 eV 287.96 nm f=0.0079

163 ->169 -0.20079

164 ->168 -0.34585

164 ->169 0.52202

165 ->169 0.16524

Excited State 9: 4.3256 eV 286.63 nm f=0.0249

163 ->168 0.20584

163 ->169 0.48449

164 ->168 -0.40830

Excited State 10: 4.4742 eV 277.11 nm f=0.0101

163 ->168 -0.39319

164 ->168 -0.11248

167 ->170 0.40637

167 ->171 0.31071

167 ->172 -0.15003

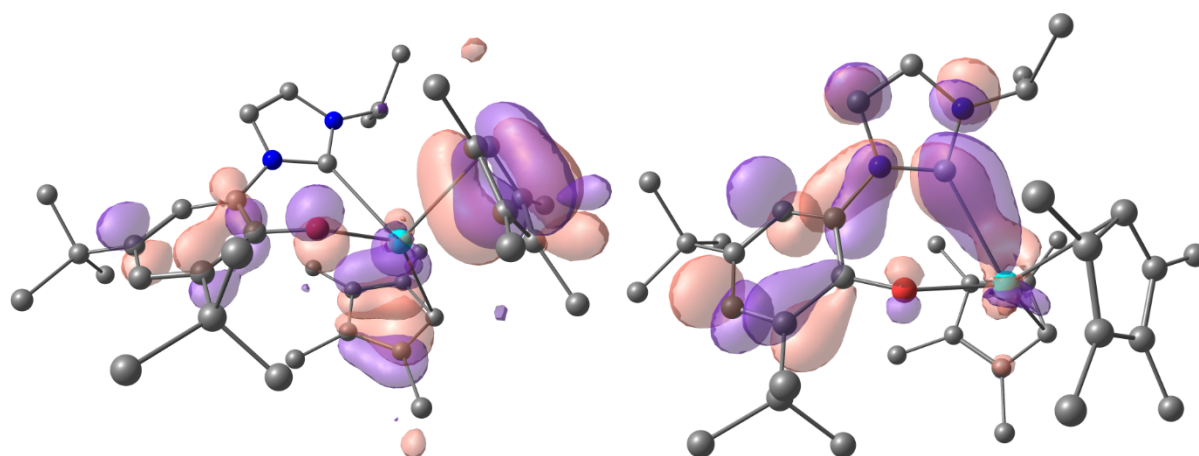

**Figure S151.** Depictions of the TD-DFT-calculated 167 HOMO (left) and 168 LUMO (right) orbitals of **1-La**.

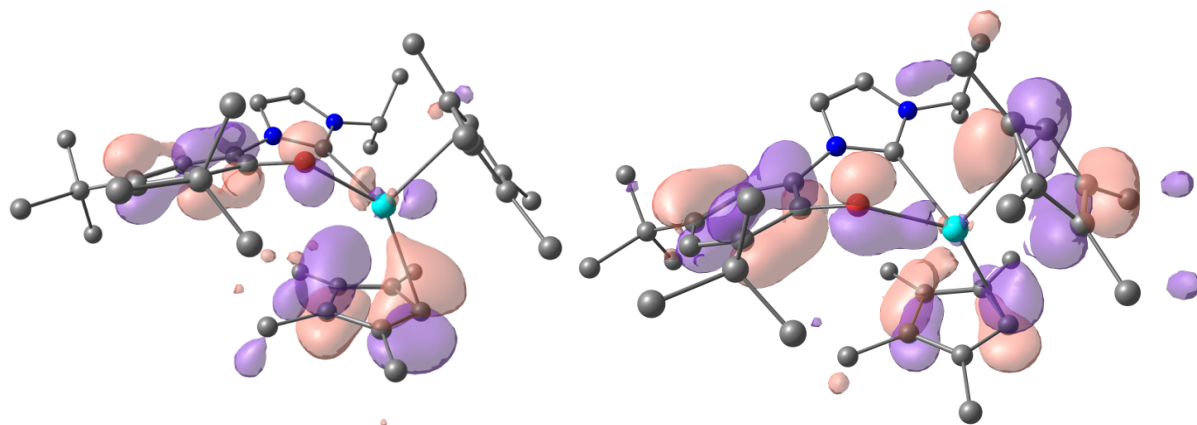

**Figure S152.** Depictions of the TD-DFT-calculated 165 HOMO-2 (left) and 164 HOMO-3 (right) orbitals of **1-La**.

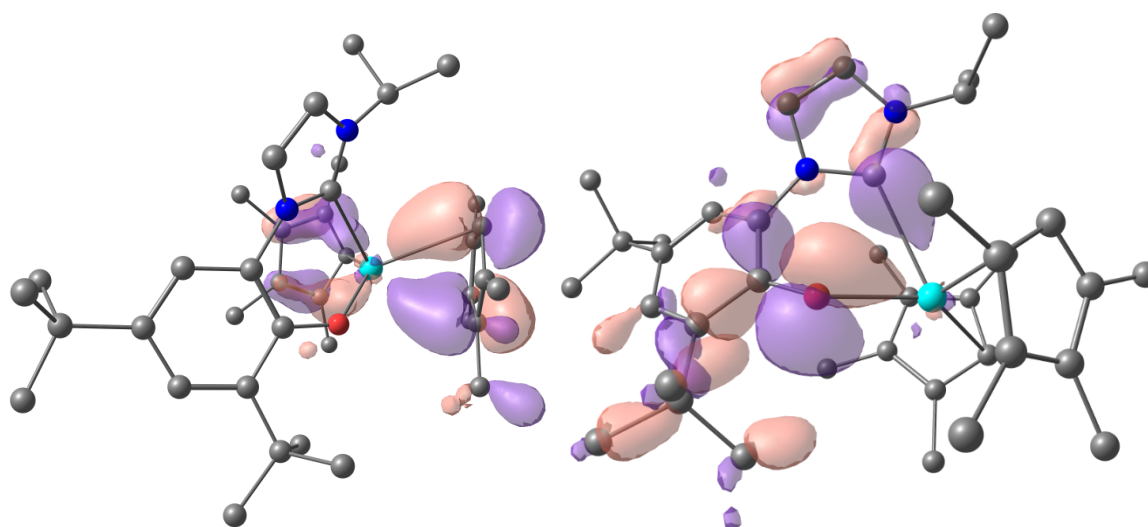

**Figure S153.** Depictions of the TD-DFT-calculated 163 HOMO-4 (left) and 161 HOMO-6 (right) orbitals of **1-La**.

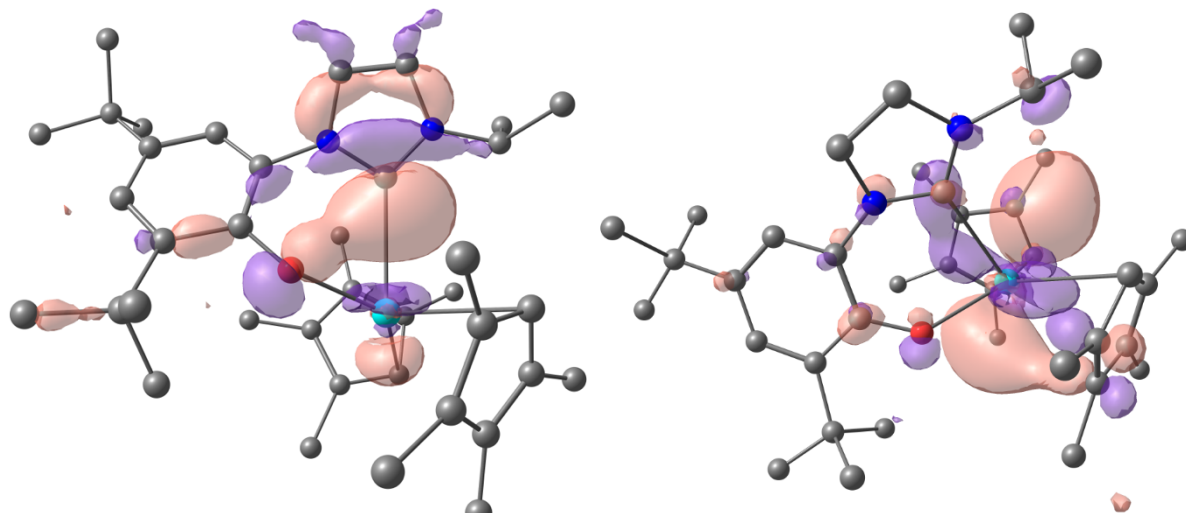

**Figure S154.** Depictions of the TD-DFT-calculated 159 HOMO-8 (left) and 169 LUMO+1 (right) orbitals of **1-La**.

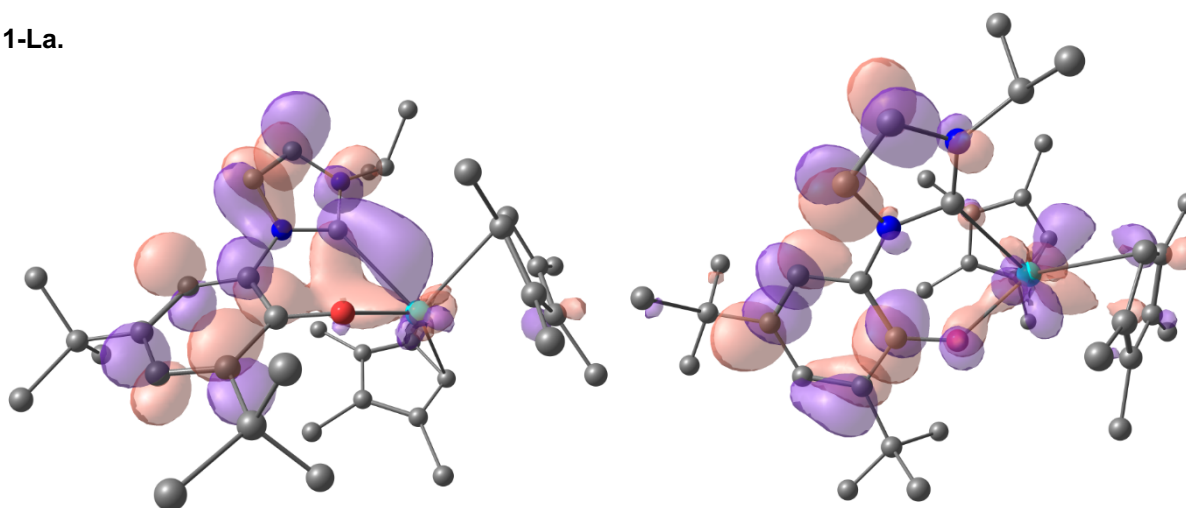

**Figure S155.** Depictions of the TD-DFT-calculated 170 LUMO+2 (left) and 172 LUMO+4 (right) orbitals of **1-La**.

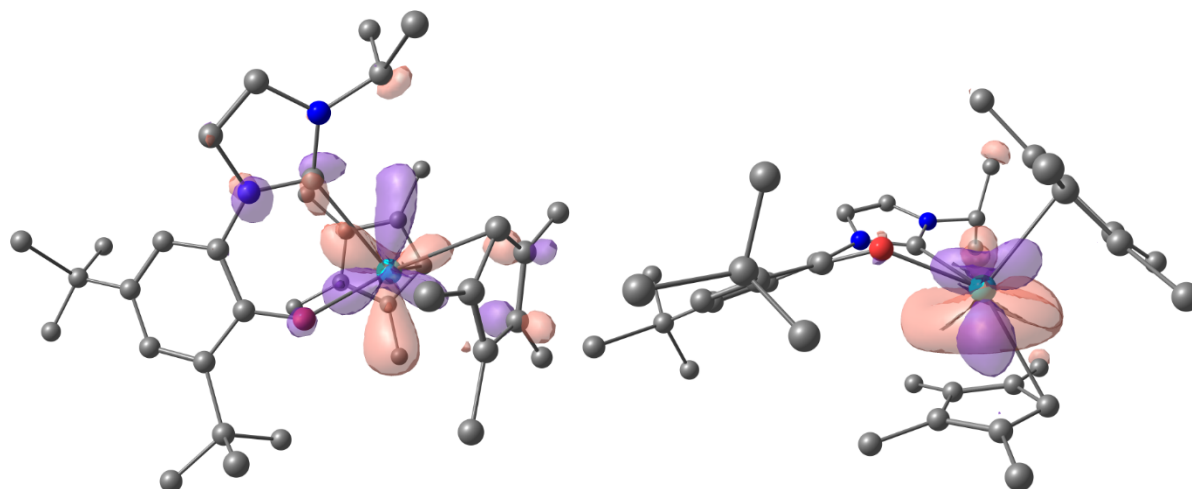

**Figure S156.** Depictions of the TD-DFT-calculated 176 LUMO+8 (left) and 177 LUMO+9 (right) orbitals of **1-La**.

S10.3 Cartesian coordinates

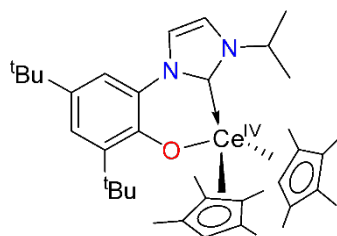

|    |            |             |             |   |             |             |             |
|----|------------|-------------|-------------|---|-------------|-------------|-------------|
| Ce | 5.41357300 | 7.74712400  | 14.46932900 | C | 6.78955600  | 7.80806900  | 9.84777100  |
| O  | 4.03990400 | 7.01425600  | 12.79992800 | H | 6.53937200  | 7.39812700  | 8.88320700  |
| N  | 6.23794100 | 7.32431200  | 11.02592600 | C | 1.17352400  | 6.44897200  | 11.93818700 |
| N  | 7.49501100 | 8.97968700  | 11.55697200 | H | 1.77103300  | 7.28518300  | 12.30420600 |
| C  | 3.35547800 | 9.49306800  | 15.24469600 | H | 0.19335700  | 6.47711000  | 12.42881200 |
| C  | 4.00371300 | 10.15301700 | 14.16803100 | H | 1.01639400  | 6.58041800  | 10.86201800 |
| C  | 4.24037900 | 9.49042400  | 16.36521100 | C | 7.58829900  | 8.84707600  | 10.18465300 |
| C  | 5.36412100 | 6.18628700  | 11.00739600 | H | 8.18811800  | 9.49549600  | 9.56591400  |
| C  | 6.65941800 | 8.05460200  | 12.10511300 | C | 9.74436000  | 9.70111600  | 12.26254200 |
| C  | 6.29616400 | 5.09727100  | 15.06287900 | H | 9.96893000  | 8.68238900  | 12.58894500 |
| C  | 5.28838000 | 10.54029500 | 14.62543800 | H | 10.28369700 | 10.39841000 | 12.91054800 |

|   |            |             |             |   |             |             |             |
|---|------------|-------------|-------------|---|-------------|-------------|-------------|
| H | 6.00385000 | 11.12712400 | 14.05952700 | H | 10.12935900 | 9.82611200  | 11.24489000 |
| C | 6.70398500 | 6.67668300  | 16.66813800 | C | 1.94179200  | 8.98633700  | 15.24233300 |
| H | 6.62407000 | 7.26835800  | 17.57426900 | H | 1.59545000  | 8.76814600  | 14.22861800 |
| C | 7.48556000 | 5.79542700  | 14.70749300 | H | 1.25045700  | 9.72537200  | 15.67035300 |
| C | 7.74259200 | 6.77297900  | 15.70931300 | H | 1.82399400  | 8.07003500  | 15.83227600 |
| C | 5.44021000 | 10.14725000 | 15.98046300 | C | 7.90407800  | 11.39555600 | 11.85685700 |
| C | 5.80831900 | 5.64643400  | 16.27995700 | H | 8.26976500  | 11.57997300 | 10.84116500 |
| C | 4.20733600 | 6.13528700  | 11.83127800 | H | 8.37752800  | 12.12998600 | 12.51511900 |
| C | 5.65830300 | 5.17543500  | 10.09295300 | H | 6.82472700  | 11.56626900 | 11.86783200 |
| H | 6.59837800 | 5.22904300  | 9.55046400  | C | 2.00242700  | 4.89801900  | 13.74464800 |
| C | 3.58630500 | 4.13261800  | 10.60052900 | H | 2.46252000  | 3.92930500  | 13.96598100 |
| H | 2.86799200 | 3.34441500  | 10.41791500 | H | 1.01104500  | 4.91433200  | 14.21328100 |
| C | 3.25684700 | 5.10834800  | 11.54497100 | H | 2.60843000  | 5.68362700  | 14.19712700 |
| C | 4.78772200 | 4.10879900  | 9.88236400  | C | 0.96211900  | 3.99103400  | 11.68894900 |
| C | 8.24325800 | 9.98139900  | 12.32526300 | H | 0.79589200  | 4.07729200  | 10.60972300 |
| H | 7.89628900 | 9.85635900  | 13.35532300 | H | -0.01493800 | 4.06305000  | 12.17867200 |
| C | 8.39781800 | 5.42944000  | 13.57286200 | H | 1.35820900  | 2.99130500  | 11.89885700 |
| H | 7.84264400 | 5.07452700  | 12.69894400 | C | 4.06971700  | 1.92097500  | 8.78999300  |
| H | 9.08902500 | 4.62551400  | 13.86320000 | H | 3.88920900  | 1.43342600  | 9.75378000  |
| H | 9.00918400 | 6.27800600  | 13.25070800 | H | 4.38162200  | 1.14652400  | 8.08110900  |
| C | 8.96444700 | 7.64020200  | 15.81412500 | H | 3.12073800  | 2.33332500  | 8.43082200  |
| H | 9.24947700 | 8.08682700  | 14.85439800 | C | 6.58156700  | 10.52463200 | 16.88000400 |
| H | 9.83432800 | 7.06567000  | 16.16022600 | H | 6.82760700  | 9.73892000  | 17.60202100 |
| H | 8.81450600 | 8.45584800  | 16.52784600 | H | 6.34884400  | 11.42722500 | 17.46134400 |
| C | 3.41818800 | 10.43951600 | 12.81469000 | H | 7.48924900  | 10.74096300 | 16.30648900 |
| H | 4.15478400 | 10.92619800 | 12.16787600 | C | 3.88846400  | 9.03223900  | 17.75122800 |
| H | 2.55355800 | 11.11143100 | 12.88626900 | H | 3.23950500  | 8.14962100  | 17.74532100 |
| H | 3.08707000 | 9.52921400  | 12.30306200 | H | 3.34917700  | 9.81382000  | 18.30426600 |
| C | 1.87498600 | 5.10571300  | 12.22418800 | H | 4.77779400  | 8.78297900  | 18.33813900 |
| C | 5.15895900 | 2.99773500  | 8.89101200  | C | 6.46452900  | 2.31664900  | 9.34725300  |
| C | 5.74996500 | 3.89272500  | 14.35236300 | H | 7.29551200  | 3.02715800  | 9.40244900  |

|   |            |            |             |   |            |            |             |
|---|------------|------------|-------------|---|------------|------------|-------------|
| H | 4.73718600 | 3.65510400 | 14.68825400 | H | 6.75134700 | 1.52364900 | 8.64637100  |
| H | 6.36926300 | 3.00627800 | 14.54676900 | H | 6.34465700 | 1.86813700 | 10.33885000 |
| H | 5.70880100 | 4.02406300 | 13.26602300 | C | 5.36591100 | 3.60052800 | 7.48740300  |
| C | 4.63567900 | 5.15328500 | 17.08040100 | H | 4.45161100 | 4.08752500 | 7.13237000  |
| H | 4.33837700 | 5.88700100 | 17.83585500 | H | 5.63779900 | 2.81931800 | 6.76773600  |
| H | 4.87829600 | 4.22403900 | 17.61278200 | H | 6.16654100 | 4.34728100 | 7.48067500  |
| H | 3.75666300 | 4.93855100 | 16.46150000 |   |            |            |             |

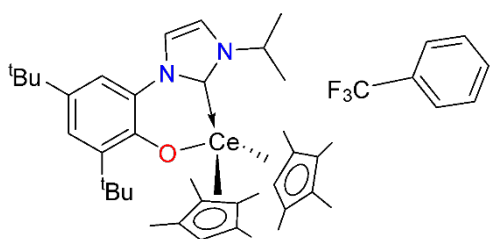

IRC reverse

|    |             |             |             |   |             |             |             |
|----|-------------|-------------|-------------|---|-------------|-------------|-------------|
| Ce | -0.50915500 | -0.18846500 | 0.94067400  | H | 1.07564800  | -0.10461200 | -4.75573600 |
| O  | -2.37862800 | -0.92182300 | -0.13866800 | C | 3.29492600  | 0.38460700  | -2.47988900 |
| N  | -0.70622200 | -1.45774000 | -2.38137400 | H | 3.41111100  | -0.50813000 | -1.86038600 |
| N  | 0.85419200  | 0.00003100  | -2.60071700 | H | 4.05210800  | 1.11511000  | -2.18063900 |
| C  | -1.95370200 | 2.14861100  | 1.54782400  | H | 3.48433100  | 0.10710900  | -3.52235700 |
| C  | -1.23843000 | 2.47548300  | 0.36344000  | C | -3.44854700 | 2.06883000  | 1.67582000  |
| C  | -1.01588200 | 2.03351800  | 2.62056500  | H | -3.92444900 | 1.84807400  | 0.71655100  |
| C  | -1.71142400 | -2.36559500 | -1.90846600 | H | -3.86812100 | 3.01800600  | 2.03768000  |
| C  | 0.07281400  | -0.59394100 | -1.65697900 | H | -3.76789700 | 1.29469700  | 2.38218900  |
| C  | 0.07924700  | -2.86342300 | 1.77868600  | C | 1.71975500  | 2.23586000  | -3.18098000 |
| C  | 0.13515000  | 2.54382500  | 0.70969800  | H | 1.93958900  | 2.02923300  | -4.23359200 |
| H  | 0.93628300  | 2.86510500  | 0.05111700  | H | 2.40129500  | 3.02092000  | -2.84931000 |
| C  | 1.05467200  | -1.17202500 | 2.98132800  | H | 0.69894100  | 2.61982300  | -3.11151700 |
| H  | 1.27998100  | -0.47302600 | 3.77920200  | C | -4.41997700 | -2.27365500 | 1.71324800  |
| C  | 1.24658000  | -2.44308000 | 1.08893600  | H | -4.07552200 | -3.24392500 | 2.08842600  |
| C  | 1.85660300  | -1.39362800 | 1.83691300  | H | -5.24522200 | -1.94033300 | 2.35462500  |
| C  | 0.27694600  | 2.29359800  | 2.10024200  | H | -3.60378400 | -1.55653700 | 1.80092800  |
| C  | -0.04751500 | -2.07039800 | 2.95631300  | C | -6.07403000 | -3.37556200 | 0.23883800  |

|   |             |             |             |   |             |             |             |
|---|-------------|-------------|-------------|---|-------------|-------------|-------------|
| C | -2.60752700 | -1.99612200 | -0.86795800 | H | -6.49073900 | -3.50148600 | -0.76617300 |
| C | -1.82097000 | -3.58983500 | -2.56791600 | H | -6.87289000 | -2.98739500 | 0.87995100  |
| H | -1.05743500 | -3.85447300 | -3.29424300 | H | -5.79787700 | -4.36307900 | 0.62487800  |
| C | -3.82667000 | -4.03621100 | -1.37884400 | C | -4.17731300 | -6.63417800 | -2.59793700 |
| H | -4.68087100 | -4.67403300 | -1.19450600 | H | -4.17443700 | -6.85090800 | -1.52459400 |
| C | -3.74803700 | -2.83265500 | -0.67380500 | H | -4.18901100 | -7.59217900 | -3.12876700 |
| C | -2.86786800 | -4.46951700 | -2.30189000 | H | -5.10876400 | -6.11135600 | -2.84011400 |
| C | 1.90225700  | 0.99081700  | -2.31545900 | C | 1.54482000  | 2.47540800  | 2.88371700  |
| H | 1.75271200  | 1.26417800  | -1.26706100 | H | 1.62625600  | 1.78574200  | 3.73025000  |
| C | 1.83006700  | -3.12111500 | -0.11503200 | H | 1.61171400  | 3.49048400  | 3.29974100  |
| H | 1.05593300  | -3.47740600 | -0.80149900 | H | 2.42764400  | 2.33283700  | 2.25353200  |
| H | 2.42997600  | -3.99569600 | 0.17469000  | C | -1.37079700 | 1.81037000  | 4.06314100  |
| H | 2.48771900  | -2.45229700 | -0.67778200 | H | -2.19654100 | 1.10043600  | 4.18112100  |
| C | 3.18313900  | -0.74638900 | 1.55083300  | H | -1.69015000 | 2.74209900  | 4.54965300  |
| H | 3.23771000  | -0.28215800 | 0.55809100  | H | -0.52247400 | 1.42438900  | 4.63667300  |
| H | 3.99991100  | -1.47836300 | 1.59827300  | C | -1.68793400 | -6.65517400 | -2.68089600 |
| H | 3.40367300  | 0.03410800  | 2.28450600  | H | -0.77082300 | -6.14874800 | -2.99839900 |
| C | -1.84980000 | 2.75781300  | -0.97787900 | H | -1.72155600 | -7.62929700 | -3.18347100 |
| H | -2.44994100 | 1.91957800  | -1.35165700 | H | -1.61489900 | -6.83047800 | -1.60263900 |
| H | -1.07662400 | 2.97045000  | -1.72078300 | C | -3.01212000 | -5.61110400 | -4.54382600 |
| H | -2.50941700 | 3.63387700  | -0.93667600 | H | -3.89312500 | -5.02036400 | -4.81606900 |
| C | -4.89438300 | -2.39010700 | 0.25354400  | H | -3.07063100 | -6.57274600 | -5.06719700 |
| C | -2.94356900 | -5.82636100 | -3.01841000 | H | -2.12901100 | -5.08631000 | -4.92059300 |
| C | -0.77794700 | -4.04485200 | 1.41900800  | C | 5.76003900  | 6.96431800  | 2.43199800  |
| H | -1.76893300 | -3.97995200 | 1.87692200  | C | 6.59986300  | 6.39395200  | 1.47723800  |
| H | -0.32314200 | -4.98174100 | 1.77006500  | C | 6.07116700  | 5.57558400  | 0.48132700  |
| H | -0.92704400 | -4.14448200 | 0.33913300  | C | 4.69838000  | 5.33328700  | 0.44521500  |
| C | -1.06856000 | -2.23809300 | 4.04323400  | C | 3.85259500  | 5.90297400  | 1.40001900  |
| H | -2.09143300 | -2.33577600 | 3.65935800  | C | 4.38726500  | 6.71832500  | 2.39265000  |
| H | -1.05290200 | -1.38752800 | 4.73184300  | H | 6.17414800  | 7.60369500  | 3.20652600  |
| H | -0.87249200 | -3.14002500 | 4.63881800  | H | 7.66821200  | 6.58682800  | 1.50488900  |



|   |             |             |             |   |            |            |             |
|---|-------------|-------------|-------------|---|------------|------------|-------------|
| C | -0.41407300 | -1.37767300 | -3.73629400 | H | 6.71813700 | 5.13106300 | -0.26751300 |
| H | -0.95911400 | -1.93803700 | -4.47765200 | H | 2.78454700 | 5.71288800 | 1.36031300  |
| C | -5.42706200 | -1.02710000 | -0.23288100 | H | 3.73174200 | 7.16432800 | 3.13477200  |
| H | -4.63430600 | -0.27747100 | -0.23174400 | C | 4.11457700 | 4.41873100 | -0.59230500 |
| H | -6.23834200 | -0.68150600 | 0.41856800  | F | 4.93870300 | 4.24049900 | -1.64369300 |
| H | -5.82389000 | -1.11185700 | -1.25063400 | F | 2.94335000 | 4.88759200 | -1.07010100 |
| C | 0.57550000  | -0.46513300 | -3.87122200 | F | 3.85536800 | 3.19321200 | -0.08160700 |

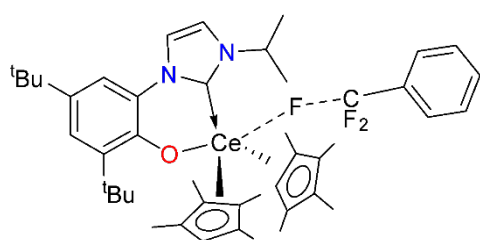

TS :

|    |            |             |             |   |            |             |             |
|----|------------|-------------|-------------|---|------------|-------------|-------------|
| Ce | 5.10278400 | 8.28669900  | 13.25446700 | H | 5.63399500 | 7.81764500  | 7.33808600  |
| O  | 3.15859800 | 7.24752700  | 12.54455700 | C | 8.10294500 | 8.68839000  | 8.89596800  |
| N  | 4.42276800 | 6.59346700  | 10.10503500 | H | 8.46038000 | 7.82238300  | 9.45950700  |
| N  | 5.78305400 | 8.12164500  | 9.47886900  | H | 8.86179900 | 9.47300500  | 8.95584100  |
| C  | 2.98025200 | 10.21699200 | 13.80848500 | H | 8.00602900 | 8.39766800  | 7.84409300  |
| C  | 4.09596300 | 10.87450500 | 13.21503400 | C | 1.61740300 | 10.14757600 | 13.19412600 |
| C  | 3.34502100 | 9.82453000  | 15.12122600 | H | 1.64870000 | 9.79323800  | 12.15876600 |
| C  | 3.59450100 | 5.67647900  | 10.82070300 | H | 1.14313000 | 11.13873000 | 13.18370400 |
| C  | 5.23327900 | 7.57875000  | 10.60412500 | H | 0.95687800 | 9.47857800  | 13.74808900 |
| C  | 5.59342800 | 5.58112200  | 14.18656900 | C | 6.25564600 | 10.41261600 | 8.69745500  |
| C  | 5.12972100 | 10.90232100 | 14.18323200 | H | 6.13028900 | 10.19757000 | 7.63040700  |
| H  | 6.11243400 | 11.32649900 | 14.04862000 | H | 6.96544600 | 11.23984800 | 8.78618000  |
| C  | 6.78109900 | 7.26468700  | 15.17950400 | H | 5.29363400 | 10.74402000 | 9.09630600  |
| H  | 7.11462700 | 8.00564800  | 15.89772300 | C | 1.26830100 | 6.15325800  | 14.68658500 |
| C  | 6.71303000 | 5.88276200  | 13.35792900 | H | 1.68987300 | 5.29080800  | 15.21491500 |
| C  | 7.46506400 | 6.90321600  | 13.99323700 | H | 0.47654000 | 6.57057000  | 15.32056800 |
| C  | 4.69036000 | 10.24996700 | 15.35092700 | H | 2.04910000 | 6.90204900  | 14.55891800 |

|   |            |             |             |   |             |             |             |
|---|------------|-------------|-------------|---|-------------|-------------|-------------|
| C | 5.62611400 | 6.44895000  | 15.31064100 | C | -0.37619800 | 4.65522200  | 13.61076600 |
| C | 2.85504300 | 6.10815000  | 11.95396600 | H | -0.89696700 | 4.33567400  | 12.70176000 |
| C | 3.47724600 | 4.38968600  | 10.29709400 | H | -1.12957700 | 5.07409000  | 14.28701300 |
| H | 4.14452100 | 4.10104900  | 9.48924100  | H | 0.04467400  | 3.76916100  | 14.09894700 |
| C | 1.69239900 | 3.97159900  | 11.79624400 | C | 1.38579000  | 1.22198200  | 10.93729300 |
| H | 0.90977300 | 3.31849700  | 12.15856100 | H | 1.57103600  | 1.13651500  | 12.01323800 |
| C | 1.78468000 | 5.24592000  | 12.36307800 | H | 1.37707600  | 0.20908500  | 10.52057900 |
| C | 2.54552400 | 3.48516800  | 10.79984200 | H | 0.38576100  | 1.64506500  | 10.79452000 |
| C | 6.77858100 | 9.19843000  | 9.46333600  | C | 5.41289500  | 10.23293000 | 16.66539900 |
| H | 6.91253400 | 9.45330300  | 10.51344100 | H | 5.29299200  | 9.28964300  | 17.20674000 |
| C | 7.14968800 | 5.10803200  | 12.14946000 | H | 5.03623600  | 11.02453000 | 17.32849300 |
| H | 6.30020100 | 4.68722500  | 11.60414500 | H | 6.48469400  | 10.40779800 | 16.53159600 |
| H | 7.80216500 | 4.26925600  | 12.43090700 | C | 2.42758800  | 9.30021900  | 16.18574000 |
| H | 7.71329800 | 5.73431600  | 11.45122200 | H | 1.51924300  | 8.86118800  | 15.76780200 |
| C | 8.81633800 | 7.38590200  | 13.57337600 | H | 2.11386800  | 10.11053400 | 16.85907200 |
| H | 8.84902500 | 7.68090700  | 12.52133400 | H | 2.90267500  | 8.53793900  | 16.81077500 |
| H | 9.57255800 | 6.60366700  | 13.72399700 | C | 3.82165000  | 1.35265500  | 10.43569600 |
| H | 9.11202800 | 8.24955900  | 14.17269400 | H | 4.63251000  | 1.88108900  | 9.92436600  |
| C | 4.10029000 | 11.55076800 | 11.87584700 | H | 3.78584500  | 0.33215800  | 10.03615300 |
| H | 3.56096000 | 10.97129600 | 11.11689100 | H | 4.08092800  | 1.29423300  | 11.49782000 |
| H | 5.12003800 | 11.71054300 | 11.51710400 | C | 2.13536400  | 2.11010600  | 8.73454600  |
| H | 3.61217700 | 12.53476500 | 11.92086700 | H | 1.17425300  | 2.60591000  | 8.56237500  |
| C | 0.68896700 | 5.72690400  | 13.32912800 | H | 2.07639500  | 1.09762200  | 8.31764500  |
| C | 2.46615000 | 2.05965200  | 10.23935400 | H | 2.89895600  | 2.65528800  | 8.17023900  |
| C | 4.70159000 | 4.38795500  | 14.04456400 | C | 9.90824600  | 12.52081700 | 15.88292200 |
| H | 3.70473000 | 4.56556400  | 14.45282500 | C | 10.50443400 | 11.38739500 | 15.32091400 |
| H | 5.12726100 | 3.53258100  | 14.58948900 | C | 10.01762800 | 10.85041600 | 14.13982200 |
| H | 4.57772500 | 4.08000000  | 13.00382600 | C | 8.90836800  | 11.44792400 | 13.49967700 |
| C | 4.75346800 | 6.33116400  | 16.52603200 | C | 8.32134600  | 12.60478700 | 14.06136000 |
| H | 3.68654800 | 6.29589400  | 16.28578000 | C | 8.82245900  | 13.12716200 | 15.24334800 |
| H | 4.91512700 | 7.16426400  | 17.21515200 | H | 10.29303300 | 12.93453400 | 16.81020900 |

|   |             |            |             |   |             |             |             |
|---|-------------|------------|-------------|---|-------------|-------------|-------------|
| H | 4.98390100  | 5.41068600 | 17.07970400 | H | 11.35831300 | 10.92495600 | 15.80714100 |
| C | 4.46193900  | 6.55282700 | 8.71847300  | H | 10.49022600 | 9.98259100  | 13.69466100 |
| H | 3.84742600  | 5.88011200 | 8.14375200  | H | 7.48891900  | 13.08583000 | 13.55974100 |
| C | -0.02423300 | 6.91614200 | 12.65663600 | H | 8.36765000  | 14.01629100 | 15.66966400 |
| H | 0.68789900  | 7.70265200 | 12.40752600 | C | 8.40472000  | 10.90045000 | 12.28551700 |
| H | -0.79002700 | 7.33465100 | 13.32147000 | F | 9.16960200  | 10.10022400 | 11.57831800 |
| H | -0.51768800 | 6.59260100 | 11.73359200 | F | 7.63768900  | 11.64361500 | 11.51705200 |
| C | 5.32668300  | 7.51453000 | 8.32630500  | F | 7.02503900  | 9.50865200  | 12.57962100 |

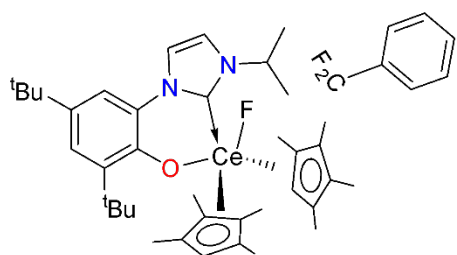

IRC forward :

|    |             |             |             |   |             |             |             |
|----|-------------|-------------|-------------|---|-------------|-------------|-------------|
| Ce | -0.12357100 | 0.30721300  | 0.64351700  | H | 0.49963600  | -0.08013100 | -5.22368300 |
| O  | -1.98897300 | -0.80408700 | -0.02110500 | C | 3.00457200  | 0.53268400  | -3.60791300 |
| N  | -0.81962100 | -1.34965900 | -2.53094200 | H | 3.27420200  | -0.37385600 | -3.05967000 |
| N  | 0.63427900  | 0.12926400  | -3.07305400 | H | 3.81899700  | 1.25337000  | -3.49572700 |
| C  | -2.09001500 | 2.32038100  | 0.92795000  | H | 2.92379100  | 0.27859800  | -4.67109300 |
| C  | -0.84202600 | 2.94690100  | 0.64603300  | C | -3.27759800 | 2.34550600  | 0.01004700  |
| C  | -2.03143500 | 1.79966500  | 2.24869900  | H | -3.15899300 | 1.68319300  | -0.85554000 |
| C  | -1.67744200 | -2.27159600 | -1.85932400 | H | -3.44597900 | 3.35822200  | -0.37505600 |
| C  | 0.03346400  | -0.42925300 | -1.97884600 | H | -4.18944500 | 2.03912800  | 0.52764700  |
| C  | 0.68224900  | -2.28746400 | 1.47123000  | C | 1.29212400  | 2.38199600  | -3.84541000 |
| C  | -0.02896400 | 2.81449000  | 1.79492500  | H | 1.19861800  | 2.18474500  | -4.91946100 |
| H  | 0.98618900  | 3.18106200  | 1.89191500  | H | 2.04699700  | 3.16193200  | -3.71518700 |
| C  | 1.44355200  | -0.52982400 | 2.72273300  | H | 0.33814100  | 2.77292900  | -3.48293900 |
| H  | 1.56932700  | 0.17355600  | 3.53685400  | C | -3.70817000 | -2.21923900 | 2.19624000  |
| C  | 1.81964200  | -1.72290600 | 0.81557500  | H | -3.31662500 | -3.19369100 | 2.50894400  |
| C  | 2.31236400  | -0.65869300 | 1.61831200  | H | -4.40901800 | -1.87898100 | 2.96803100  |
| C  | -0.74949500 | 2.11666400  | 2.78931100  | H | -2.88208600 | -1.51149700 | 2.14210300  |
| C  | 0.44614200  | -1.54460500 | 2.65568200  | C | -5.56811700 | -3.34385700 | 1.01431600  |
| C  | -2.35552200 | -1.89841000 | -0.67114700 | H | -6.13841600 | -3.48558400 | 0.09004200  |

|   |             |             |             |   |             |             |             |
|---|-------------|-------------|-------------|---|-------------|-------------|-------------|
| C | -1.86316600 | -3.51589600 | -2.45941200 | H | -6.25999000 | -2.96033500 | 1.77205600  |
| H | -1.23655600 | -3.77645000 | -3.30772600 | H | -5.21959200 | -4.32300700 | 1.36084500  |
| C | -3.59072500 | -3.98233700 | -0.90839500 | C | -4.05140100 | -6.64186900 | -1.95514600 |
| H | -4.37690700 | -4.63508700 | -0.55364000 | H | -3.83331600 | -6.81597100 | -0.89616900 |
| C | -3.42336300 | -2.75609800 | -0.25705800 | H | -4.11827100 | -7.61964700 | -2.44394400 |
| C | -2.80601000 | -4.42031900 | -1.97892600 | H | -5.03636900 | -6.16875400 | -2.02907400 |
| C | 1.71006200  | 1.13703800  | -3.06497400 | C | -0.34296300 | 1.98076700  | 4.22634700  |
| H | 1.84579900  | 1.39529600  | -2.01633300 | H | -0.55016000 | 0.99152000  | 4.64579300  |
| C | 2.50811000  | -2.27912900 | -0.39440800 | H | -0.88630400 | 2.70632500  | 4.84663800  |
| H | 1.80736500  | -2.74761400 | -1.09064100 | H | 0.72401300  | 2.18405000  | 4.35552300  |
| H | 3.24622100  | -3.04273400 | -0.11102200 | C | -3.17787800 | 1.24771000  | 3.04032500  |
| H | 3.04512400  | -1.49646400 | -0.93718000 | H | -3.92958400 | 0.77602900  | 2.40510800  |
| C | 3.56826500  | 0.12183700  | 1.38681200  | H | -3.67873300 | 2.04670200  | 3.60526800  |
| H | 3.58803800  | 0.58108400  | 0.39557300  | H | -2.85465200 | 0.50118300  | 3.77233900  |
| H | 4.45037600  | -0.52405800 | 1.48385200  | C | -1.62785900 | -6.56845300 | -2.52464800 |
| H | 3.66554700  | 0.92605400  | 2.12164600  | H | -0.81153900 | -6.03526500 | -3.02217300 |
| C | -0.50580900 | 3.71352500  | -0.59603400 | H | -1.71430100 | -7.55606700 | -2.99318000 |
| H | -0.95795000 | 3.26647600  | -1.48833600 | H | -1.34205000 | -6.71175500 | -1.47745700 |
| H | 0.57380100  | 3.75549800  | -0.74865400 | C | -3.33314200 | -5.63586400 | -4.11720400 |
| H | -0.88091300 | 4.74452300  | -0.53575000 | H | -4.27855000 | -5.09413600 | -4.22576400 |
| C | -4.41752200 | -2.33983300 | 0.83967800  | H | -3.44413300 | -6.61558300 | -4.59652300 |
| C | -2.95994500 | -5.80005100 | -2.63058300 | H | -2.56590000 | -5.08385100 | -4.66961300 |
| C | 0.00048300  | -3.56020000 | 1.07109600  | C | 5.58998600  | 5.44169900  | 2.88513300  |
| H | -1.04512700 | -3.59031400 | 1.38584400  | C | 6.15104300  | 4.27179000  | 2.35652900  |
| H | 0.50610800  | -4.42467800 | 1.52333700  | C | 5.66475800  | 3.71664500  | 1.18672700  |
| H | 0.01210700  | -3.70973500 | -0.01155900 | C | 4.57841700  | 4.33465400  | 0.50400800  |
| C | -0.49946100 | -1.90590700 | 3.76349300  | C | 4.01430300  | 5.52429900  | 1.04704100  |
| H | -1.19609300 | -2.68945600 | 3.46136700  | C | 4.52120200  | 6.05579100  | 2.21932300  |
| H | -1.09399300 | -1.05706400 | 4.11694700  | H | 5.97981900  | 5.86883600  | 3.80390100  |
| H | 0.05814300  | -2.28357700 | 4.63046200  | H | 6.97910000  | 3.78979000  | 2.86904200  |
| C | -0.76178700 | -1.33465900 | -3.91720100 | H | 6.10246700  | 2.81086000  | 0.78133200  |
| H | -1.40247000 | -1.94571600 | -4.53061900 | H | 3.18660000  | 6.00373400  | 0.53543800  |
| C | -5.04790700 | -0.99270900 | 0.44111000  | H | 4.08013900  | 6.96192300  | 2.62560700  |
| H | -4.27966700 | -0.23410600 | 0.29370000  | C | 4.09612800  | 3.80008900  | -0.68703500 |
| H | -5.74092300 | -0.64919200 | 1.21887400  | F | 4.53601400  | 2.67173500  | -1.22332500 |

|   |             |             |             |   |            |            |             |
|---|-------------|-------------|-------------|---|------------|------------|-------------|
| H | -5.61379700 | -1.09439900 | -0.49149100 | F | 3.07208600 | 4.30139800 | -1.36213800 |
| C | 0.16038700  | -0.40632900 | -4.25350800 | F | 1.48457200 | 1.40256900 | -0.16364400 |

[Ce]-F :

|    |            |             |             |   |             |             |             |
|----|------------|-------------|-------------|---|-------------|-------------|-------------|
| Ce | 5.06163300 | 8.24830500  | 13.23941000 | C | 4.29870900  | 6.50478300  | 8.73260900  |
| O  | 3.18558000 | 7.11010500  | 12.65651200 | H | 3.64704900  | 5.87390000  | 8.15176800  |
| N  | 4.28139400 | 6.52035100  | 10.12001700 | C | 0.14571600  | 6.92540500  | 13.20844500 |
| N  | 5.70123900 | 8.00303000  | 9.50225500  | H | 0.90665200  | 7.68166700  | 13.01533600 |
| C  | 3.11294700 | 10.27876900 | 13.51732400 | H | -0.52157700 | 7.28677300  | 14.00044800 |
| C  | 4.35889500 | 10.89529800 | 13.20436200 | H | -0.45101600 | 6.79916300  | 12.29833700 |
| C  | 3.18991400 | 9.78434600  | 14.84797100 | C | 5.19990300  | 7.43500800  | 8.34842300  |
| C  | 3.44852900 | 5.60920200  | 10.83656700 | H | 5.50636600  | 7.74157100  | 7.36115100  |
| C  | 5.13965300 | 7.46204800  | 10.62609400 | C | 8.05749900  | 8.41635800  | 8.91732800  |
| C  | 5.89850400 | 5.68739700  | 14.11944900 | H | 8.35818500  | 7.54669100  | 9.50729400  |
| C  | 5.18942700 | 10.77886900 | 14.34224700 | H | 8.86186300  | 9.15671100  | 8.96609000  |
| H  | 6.20795000 | 11.14190200 | 14.41542400 | H | 7.95675000  | 8.10285900  | 7.87190000  |
| C  | 6.68833400 | 7.48186300  | 15.29812600 | C | 1.90744400  | 10.29570200 | 12.62284900 |
| H  | 6.83508700 | 8.20901900  | 16.08730600 | H | 2.02992400  | 9.67228200  | 11.72941000 |
| C  | 7.01781100 | 6.23405900  | 13.41831400 | H | 1.69553200  | 11.31572900 | 12.27996400 |
| C  | 7.52921100 | 7.32144400  | 14.17642400 | H | 1.01745000  | 9.93745400  | 13.14455600 |
| C  | 4.48135500 | 10.10492300 | 15.36184900 | C | 6.31708100  | 10.23522600 | 8.64053300  |
| C  | 5.69197100 | 6.46361700  | 15.28791200 | H | 6.19286500  | 9.99533600  | 7.57840000  |
| C  | 2.80473300 | 6.00335400  | 12.03709800 | H | 7.07352600  | 11.02254800 | 8.71128100  |
| C  | 3.24814900 | 4.35255500  | 10.26727200 | H | 5.37281100  | 10.63859400 | 9.01461000  |
| H  | 3.84908500 | 4.07539000  | 9.40589400  | C | 1.54846100  | 5.74348400  | 14.94723200 |
| C  | 1.56794900 | 3.91305200  | 11.87770200 | H | 1.94380600  | 4.77552300  | 15.27492900 |
| H  | 0.79371900 | 3.26660500  | 12.26793100 | H | 0.87657000  | 6.11145000  | 15.73182200 |
| C  | 1.75250400 | 5.15158500  | 12.49966500 | H | 2.37851200  | 6.44139500  | 14.84570300 |
| C  | 2.32184400 | 3.45624100  | 10.79285400 | C | -0.34684700 | 4.58650500  | 13.85448800 |
| C  | 6.76344600 | 9.02421900  | 9.45809500  | H | -0.94898200 | 4.42447100  | 12.95402600 |
| H  | 6.91125700 | 9.31988700  | 10.49561100 | H | -1.01270900 | 4.98356400  | 14.62834400 |

|   |            |             |             |   |            |             |             |
|---|------------|-------------|-------------|---|------------|-------------|-------------|
| C | 7.67443600 | 5.63832800  | 12.20924900 | H | 0.01716300 | 3.61545600  | 14.20772300 |
| H | 6.95121300 | 5.18548700  | 11.52550300 | C | 1.07563700 | 1.23643900  | 10.88577900 |
| H | 8.38739600 | 4.85256000  | 12.49619900 | H | 1.31637400 | 1.08246700  | 11.94294800 |
| H | 8.23440700 | 6.39347300  | 11.65071000 | H | 0.99783700 | 0.24947800  | 10.41748600 |
| C | 8.77376200 | 8.10171200  | 13.88629200 | H | 0.08938600 | 1.70866600  | 10.82386700 |
| H | 8.74247200 | 8.56112600  | 12.89473700 | C | 4.90914100 | 9.99307100  | 16.79476400 |
| H | 9.66063300 | 7.45804900  | 13.94036600 | H | 4.69853300 | 9.01429700  | 17.23679400 |
| H | 8.90496500 | 8.90584200  | 14.61621700 | H | 4.38287200 | 10.73634600 | 17.40874900 |
| C | 4.68301200 | 11.63949100 | 11.94528600 | H | 5.97995600 | 10.18785300 | 16.90428300 |
| H | 4.17646700 | 11.20978100 | 11.07419000 | C | 2.05480900 | 9.25682400  | 15.67239100 |
| H | 5.75821200 | 11.62635600 | 11.75340400 | H | 1.28525500 | 8.77984500  | 15.06328000 |
| H | 4.36236500 | 12.68792900 | 12.01313600 | H | 1.57281000 | 10.07059800 | 16.23253200 |
| C | 0.79352800 | 5.58975800  | 13.61856200 | H | 2.38712300 | 8.52147100  | 16.41181800 |
| C | 2.15242800 | 2.06435300  | 10.17099400 | C | 3.48627600 | 1.29705800  | 10.26223500 |
| C | 5.20905100 | 4.40409600  | 13.76867500 | H | 4.29147800 | 1.81891600  | 9.73536500  |
| H | 4.18645300 | 4.36307900  | 14.15020900 | H | 3.38846100 | 0.30014300  | 9.81643700  |
| H | 5.75382800 | 3.54810600  | 14.19055200 | H | 3.79577000 | 1.17509700  | 11.30536900 |
| H | 5.15227500 | 4.24878000  | 12.68806700 | C | 1.74638200 | 2.20100700  | 8.69023000  |
| C | 4.76175100 | 6.14958200  | 16.42310800 | H | 0.80050300 | 2.74397700  | 8.59237600  |
| H | 4.14364200 | 5.27678200  | 16.20570500 | H | 1.62118100 | 1.21269500  | 8.23253800  |
| H | 4.08415400 | 6.97441100  | 16.66859300 | H | 2.50261800 | 2.73910400  | 8.10957800  |
| H | 5.33292500 | 5.92692200  | 17.33303500 | F | 6.63481800 | 9.32962900  | 12.35560900 |

[Ce]— Ph:

|    |            |            |             |   |            |            |            |
|----|------------|------------|-------------|---|------------|------------|------------|
| Ce | 4.98880200 | 8.16593400 | 13.53152000 | H | 5.99004600 | 8.01105800 | 7.55791800 |
| O  | 3.15129600 | 7.21920000 | 12.56222100 | C | 8.49107500 | 8.38111600 | 9.07008900 |
| N  | 4.58207200 | 6.70674400 | 10.18822400 | H | 8.71422400 | 7.40355800 | 9.50651000 |
| N  | 6.12551200 | 8.11345000 | 9.71787800  | H | 9.36764400 | 9.02203400 | 9.20288600 |
| C  | 2.78851800 | 9.91857200 | 13.99885400 | H | 8.33644400 | 8.24961000 | 7.99375400 |

|   |            |             |             |   |             |             |             |
|---|------------|-------------|-------------|---|-------------|-------------|-------------|
| C | 3.80488100 | 10.63528400 | 13.31478800 | C | 1.39568400  | 9.74244400  | 13.48886200 |
| C | 3.24774200 | 9.64387000  | 15.31776200 | H | 1.38257600  | 9.53692600  | 12.41558200 |
| C | 3.69177200 | 5.75746100  | 10.78147500 | H | 0.81549200  | 10.66243000 | 13.65028500 |
| C | 5.48100900 | 7.55171900  | 10.79115900 | H | 0.86545600  | 8.93291900  | 13.99141500 |
| C | 5.12324800 | 5.59393700  | 14.83378900 | C | 6.92769000  | 10.38056400 | 9.15087900  |
| C | 4.87221300 | 10.82454600 | 14.22438600 | H | 6.70273100  | 10.30627700 | 8.08126000  |
| H | 5.75455600 | 11.42140700 | 14.05366300 | H | 7.77043500  | 11.06835600 | 9.26654600  |
| C | 6.85026700 | 7.04920100  | 15.21335500 | H | 6.05859600  | 10.81552800 | 9.65173000  |
| H | 7.48885800 | 7.77850700  | 15.69662900 | C | 0.93668900  | 6.17372100  | 14.40483100 |
| C | 6.04705800 | 5.47471800  | 13.76126800 | H | 1.24027700  | 5.34029800  | 15.04418800 |
| C | 7.12776600 | 6.36307200  | 14.00560500 | H | 0.06520100  | 6.64720800  | 14.87310400 |
| C | 4.54735200 | 10.21208700 | 15.45576500 | H | 1.75305200  | 6.89302100  | 14.36234800 |
| C | 5.62187800 | 6.56941000  | 15.73985000 | C | -0.46794200 | 4.54913700  | 13.19741200 |
| C | 2.88352200 | 6.11061400  | 11.88960100 | H | -0.89861800 | 4.20252400  | 12.25235500 |
| C | 3.60409000 | 4.51512200  | 10.15548100 | H | -1.29320700 | 4.93391600  | 13.80637900 |
| H | 4.31956400 | 4.28538300  | 9.37072400  | H | -0.04586400 | 3.68646800  | 13.72485800 |
| C | 1.74467800 | 3.99001500  | 11.52081600 | C | 1.48751200  | 1.31293200  | 10.44097000 |
| H | 0.94232100 | 3.31507800  | 11.78560800 | H | 1.59310600  | 1.15079300  | 11.51886700 |
| C | 1.78645800 | 5.22881900  | 12.17068800 | H | 1.50939000  | 0.33153900  | 9.95536600  |
| C | 2.65506700 | 3.57468700  | 10.54386200 | H | 0.50045600  | 1.74959700  | 10.25493700 |
| C | 7.28267100 | 9.02227500  | 9.75236800  | C | 5.35973800  | 10.36690200 | 16.70806300 |
| H | 7.51933900 | 9.15568900  | 10.80550000 | H | 5.01588600  | 9.71242900  | 17.51177100 |
| C | 6.04339000 | 4.40532900  | 12.71231700 | H | 5.28796300  | 11.39617300 | 17.08264100 |
| H | 5.04793300 | 3.98669500  | 12.55443200 | H | 6.42177400  | 10.16792000 | 16.53304300 |
| H | 6.70431900 | 3.57888600  | 13.01105900 | C | 2.39771700  | 9.09549000  | 16.42677100 |
| H | 6.40482700 | 4.77146100  | 11.74669600 | H | 1.90256600  | 8.15571700  | 16.16395800 |
| C | 8.40537300 | 6.35720900  | 13.21851900 | H | 1.60424900  | 9.80797900  | 16.68899200 |
| H | 8.23168100 | 6.45109200  | 12.14018600 | H | 2.98071700  | 8.92167600  | 17.33400000 |
| H | 8.93657600 | 5.40809200  | 13.37038000 | C | 3.95394300  | 1.46560900  | 10.13211900 |
| H | 9.08438900 | 7.15762300  | 13.52031800 | H | 4.80119200  | 2.02698700  | 9.72577900  |
| C | 3.69603600 | 11.21322100 | 11.93282100 | H | 3.95025100  | 0.47745200  | 9.65705400  |

|   |             |             |             |   |             |             |             |
|---|-------------|-------------|-------------|---|-------------|-------------|-------------|
| H | 3.41324800  | 10.46673600 | 11.18012700 | H | 4.13002100  | 1.32694400  | 11.20384400 |
| H | 4.64335600  | 11.66353000 | 11.62089500 | C | 2.39870100  | 2.34494100  | 8.36554200  |
| H | 2.93485500  | 12.00351200 | 11.89169900 | H | 1.45448900  | 2.85850000  | 8.15608300  |
| C | 0.56608400  | 5.67080200  | 13.00160100 | H | 2.36771700  | 1.36282600  | 7.87938100  |
| C | 2.61660400  | 2.19068000  | 9.88376900  | H | 3.20371600  | 2.91934000  | 7.89584700  |
| C | 3.98875500  | 4.65577000  | 15.10565100 | C | 7.12307800  | 9.50574900  | 13.07025300 |
| H | 3.31601000  | 5.05049000  | 15.87049200 | H | 7.59781100  | 8.59084300  | 12.70692800 |
| H | 4.37108400  | 3.69531800  | 15.47863600 | H | 6.61805100  | 10.02937000 | 12.24880500 |
| H | 3.39490000  | 4.44229100  | 14.21260800 | C | 8.06637200  | 10.39308300 | 13.75977500 |
| C | 5.11478600  | 6.79449000  | 17.13364500 | C | 9.04111900  | 9.91477300  | 14.66398300 |
| H | 4.02905300  | 6.91450300  | 17.18260800 | C | 8.05970000  | 11.78919400 | 13.53645400 |
| H | 5.57527900  | 7.67424200  | 17.58731200 | C | 9.92390800  | 10.77070000 | 15.31394200 |
| H | 5.36854500  | 5.93517500  | 17.76899000 | H | 9.11102400  | 8.84878000  | 14.85505500 |
| C | 4.64688300  | 6.78210400  | 8.80494200  | C | 8.93716600  | 12.64760900 | 14.19207100 |
| H | 3.97755000  | 6.22797300  | 8.16802100  | H | 7.36384400  | 12.20225900 | 12.80846300 |
| C | -0.12457200 | 6.78847500  | 12.19162000 | C | 9.87637800  | 12.14782700 | 15.09288400 |
| H | 0.56171100  | 7.61173900  | 11.99250200 | H | 10.65828500 | 10.35630700 | 16.00076100 |
| H | -0.99039200 | 7.18405600  | 12.73653200 | H | 8.89368000  | 13.71459100 | 13.98638600 |
| H | -0.47677900 | 6.39836600  | 11.23059300 | H | 10.56459800 | 12.81503700 | 15.60374700 |
| C | 5.62389400  | 7.66560600  | 8.51137700  |   |             |             |             |

(PhCH<sub>2</sub>)<sub>2</sub>Mg(THF)<sub>2</sub> :

|    |             |             |             |   |             |            |             |
|----|-------------|-------------|-------------|---|-------------|------------|-------------|
| Mg | -0.75509500 | 0.47775600  | -0.37826200 | H | 1.75450100  | 0.76365600 | -6.31472100 |
| C  | -2.69637600 | -0.37885400 | 0.13198500  | C | -2.08947000 | 2.04368900 | -2.68852000 |
| H  | -3.52224700 | 0.09273200  | -0.41504100 | O | -1.11130500 | 2.13787400 | -1.62053100 |
| H  | -2.62377500 | -1.42067000 | -0.20841700 | C | -0.09745800 | 3.11942700 | -1.95782100 |
| C  | 0.94926000  | -0.64789300 | -1.14610000 | C | -0.37207500 | 3.50721900 | -3.40452300 |
| H  | 1.85346700  | -0.51826600 | -0.53841700 | C | -1.88475200 | 3.30189800 | -3.51691400 |
| H  | 0.63469300  | -1.69640900 | -1.05485500 | H | -1.87750000 | 1.14149200 | -3.27375000 |



|   |             |             |             |   |             |            |             |
|---|-------------|-------------|-------------|---|-------------|------------|-------------|
| C | -2.91536800 | -0.31459600 | 1.58957000  | H | -3.07583300 | 1.95815300 | -2.22731400 |
| C | -2.28137000 | -1.21454200 | 2.47792900  | H | -0.21237400 | 3.96783800 | -1.27235200 |
| C | -3.72949100 | 0.67383200  | 2.18666700  | H | 0.88429700  | 2.66081800 | -1.81813300 |
| C | -2.43798200 | -1.12322200 | 3.85781400  | H | -0.05699900 | 4.53113500 | -3.62282200 |
| H | -1.66769600 | -2.01280400 | 2.06201800  | H | 0.15969500  | 2.82808500 | -4.07859300 |
| C | -3.88505000 | 0.76837800  | 3.56806100  | H | -2.42799500 | 4.14593800 | -3.07696800 |
| H | -4.26790700 | 1.36647300  | 1.54079800  | H | -2.22590200 | 3.17422900 | -4.54737200 |
| C | -3.23677600 | -0.12559600 | 4.42238000  | C | 0.82044500  | 1.05918100 | 2.21875100  |
| H | -1.94038200 | -1.84699400 | 4.50024500  | O | -0.06436600 | 1.64618400 | 1.22945400  |
| H | -4.53359400 | 1.53881800  | 3.98062200  | C | -0.82341200 | 2.73196100 | 1.82099100  |
| H | -3.36687100 | -0.06005300 | 5.49889200  | C | -0.51411700 | 2.68027400 | 3.31128100  |
| C | 1.19854100  | -0.29386600 | -2.55666400 | C | 0.89833500  | 2.09069800 | 3.33268100  |
| C | 0.38173400  | -0.78414600 | -3.60237900 | H | 0.37255800  | 0.12332800 | 2.57235300  |
| C | 2.23272300  | 0.58859700  | -2.94107800 | H | 1.77240400  | 0.84752700 | 1.72688600  |
| C | 0.57573000  | -0.40890900 | -4.92843200 | H | -0.48401800 | 3.66709100 | 1.35933000  |
| H | -0.41027500 | -1.49117000 | -3.35813300 | H | -1.88121800 | 2.57200600 | 1.59959200  |
| C | 2.42647400  | 0.96754400  | -4.26788300 | H | -0.57836200 | 3.66636800 | 3.77906400  |
| H | 2.91096300  | 0.96283300  | -2.17510900 | H | -1.21861200 | 2.00989300 | 3.81392300  |
| C | 1.59692300  | 0.47805900  | -5.27852400 | H | 1.64587400  | 2.85675500 | 3.09732000  |
| H | -0.07029100 | -0.82301000 | -5.70001100 | H | 1.16098700  | 1.63863900 | 4.29246800  |
| H | 3.24552800  | 1.63951200  | -4.51687100 |   |             |            |             |

-(PhCH<sub>2</sub>)MgF :

|    |             |             |             |   |             |            |             |
|----|-------------|-------------|-------------|---|-------------|------------|-------------|
| Mg | -1.26663500 | 1.47703700  | -0.06615100 | H | -3.03003000 | 3.31229000 | -1.35560000 |
| C  | -0.39540400 | -0.48841300 | -0.17451400 | H | 0.56405700  | 3.24463100 | -2.11351500 |
| H  | 0.19224700  | -0.72365400 | 0.72214300  | H | 0.24604300  | 1.87135400 | -3.20591500 |
| H  | -1.23504700 | -1.19514100 | -0.20900300 | H | -0.03038500 | 4.50967700 | -4.08008200 |
| C  | 0.42991300  | -0.58207500 | -1.39800600 | H | -1.09624800 | 3.22756700 | -4.67287900 |
| C  | -0.13254700 | -0.91796300 | -2.64953100 | H | -1.64258000 | 5.11451800 | -2.31737900 |
| C  | 1.80822300  | -0.27518400 | -1.39891200 | H | -2.71202700 | 4.78489800 | -3.69294300 |

|   |             |             |             |   |             |            |            |
|---|-------------|-------------|-------------|---|-------------|------------|------------|
| C | 0.62420300  | -0.93171000 | -3.81782100 | C | 1.21465600  | 2.37515300 | 1.66977100 |
| H | -1.18862100 | -1.17890000 | -2.69378400 | O | 0.01113600  | 2.78782900 | 0.97792700 |
| C | 2.56677600  | -0.28614500 | -2.56651100 | C | -0.68908500 | 3.79737400 | 1.75592800 |
| H | 2.29187400  | -0.03612600 | -0.45281500 | C | -0.21499400 | 3.56379100 | 3.17902000 |
| C | 1.98309200  | -0.60912200 | -3.79238000 | C | 1.25532200  | 3.18974300 | 2.96380400 |
| H | 0.14957000  | -1.20583800 | -4.75787000 | H | 1.13776000  | 1.29912400 | 1.85494200 |
| H | 3.62774600  | -0.04939000 | -2.51682600 | H | 2.07319300  | 2.55703500 | 1.01619900 |
| H | 2.57511000  | -0.62412000 | -4.70315100 | H | -0.39125500 | 4.78850200 | 1.38873800 |
| C | -2.49349700 | 3.12703400  | -2.28857000 | H | -1.75305800 | 3.61890400 | 1.57753900 |
| O | -1.30311100 | 2.38091200  | -1.92881300 | H | -0.34493600 | 4.44391000 | 3.81426700 |
| C | -0.18346500 | 2.77210100  | -2.76102600 | H | -0.76839000 | 2.73171700 | 3.62781300 |
| C | -0.76195400 | 3.75713100  | -3.77418200 | H | 1.85980400  | 4.09345900 | 2.83012100 |
| C | -1.96494000 | 4.34443300  | -3.02738100 | H | 1.68366100  | 2.61989200 | 3.79247300 |
| H | -3.11027800 | 2.49806300  | -2.94335100 | F | -2.81369700 | 2.14809500 | 0.55211400 |

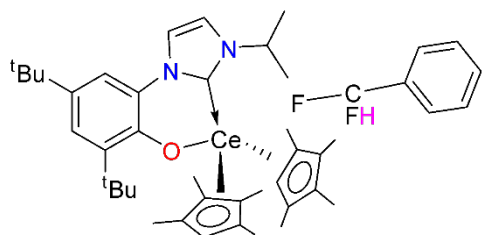

IRC reverse :

|    |             |             |             |   |             |             |             |
|----|-------------|-------------|-------------|---|-------------|-------------|-------------|
| Ce | -0.37225200 | -0.12644300 | 0.91973000  | H | 1.18137400  | 0.04054800  | -4.76094700 |
| O  | -2.25330100 | -0.86150700 | -0.14286800 | C | 3.42864500  | 0.40584600  | -2.60742500 |
| N  | -0.61693200 | -1.35010900 | -2.41954200 | H | 3.55202200  | -0.56514800 | -2.12023300 |
| N  | 0.98388200  | 0.06774800  | -2.60109600 | H | 4.21531800  | 1.07564900  | -2.25146400 |
| C  | -1.84292500 | 2.13297700  | 1.73354200  | H | 3.56045700  | 0.26610900  | -3.68596600 |
| C  | -1.39913800 | 2.44203400  | 0.42189000  | C | -3.27170800 | 1.95482600  | 2.16051900  |
| C  | -0.70755500 | 2.13139000  | 2.60050600  | H | -3.90972900 | 1.67081900  | 1.31949100  |
| C  | -1.63240400 | -2.25696900 | -1.96623100 | H | -3.68251900 | 2.88297400  | 2.58157600  |
| C  | 0.19456200  | -0.53798200 | -1.67230400 | H | -3.38747200 | 1.18449400  | 2.93175300  |
| C  | 0.17896200  | -2.76663000 | 1.86455600  | C | 1.84893300  | 2.34776600  | -2.99512300 |
| C  | 0.00737600  | 2.61535700  | 0.48515100  | H | 1.94334800  | 2.24467600  | -4.08158100 |
| H  | 0.63915000  | 2.92387300  | -0.34107900 | H | 2.60351700  | 3.06433900  | -2.66318200 |

|   |             |             |             |   |             |             |             |
|---|-------------|-------------|-------------|---|-------------|-------------|-------------|
| C | 1.24263300  | -1.05958600 | 2.95795900  | H | 0.85805300  | 2.75441000  | -2.77602400 |
| H | 1.50099600  | -0.31960700 | 3.70856600  | C | -4.27477500 | -2.27312000 | 1.70488900  |
| C | 1.33435300  | -2.41105800 | 1.11406100  | H | -3.94428200 | -3.26496500 | 2.03090900  |
| C | 1.99873600  | -1.35271500 | 1.79648200  | H | -5.08055500 | -1.94963700 | 2.37481400  |
| C | 0.44113800  | 2.44149400  | 1.82467600  | H | -3.44133500 | -1.57731900 | 1.80675100  |
| C | 0.11733700  | -1.92365500 | 3.00828900  | C | -5.97472000 | -3.28210500 | 0.21288600  |
| C | -2.50637900 | -1.90974100 | -0.90035600 | H | -6.41292800 | -3.35613400 | -0.78822700 |
| C | -1.77194200 | -3.45447900 | -2.66744700 | H | -6.75448400 | -2.91052200 | 0.88644400  |
| H | -1.02235300 | -3.70569200 | -3.41286300 | H | -5.70753000 | -4.29015000 | 0.54884600  |
| C | -3.76520700 | -3.91356900 | -1.46185400 | C | -4.17812200 | -6.45629500 | -2.78832900 |
| H | -4.62593900 | -4.54431700 | -1.28443400 | H | -4.17933200 | -6.71177100 | -1.72344500 |
| C | -3.65517900 | -2.73824500 | -0.71478300 | H | -4.20594000 | -7.39440500 | -3.35293400 |
| C | -2.82870100 | -4.32653700 | -2.41680700 | H | -5.10077500 | -5.90973900 | -3.01096300 |
| C | 2.06352000  | 1.01231400  | -2.28664800 | C | 1.82603500  | 2.70557800  | 2.34159900  |
| H | 1.99056800  | 1.17029100  | -1.20704400 | H | 2.14480800  | 1.97170300  | 3.09011900  |
| C | 1.85172300  | -3.15637800 | -0.08165100 | H | 1.88944800  | 3.69204000  | 2.82037500  |
| H | 1.04120500  | -3.51377400 | -0.72450600 | H | 2.56364900  | 2.69910500  | 1.53391100  |
| H | 2.43412300  | -4.03783900 | 0.22214300  | C | -0.75407700 | 2.00531300  | 4.09585800  |
| H | 2.50904100  | -2.53429900 | -0.69663600 | H | -1.53245300 | 1.31064700  | 4.42977000  |
| C | 3.33180400  | -0.76043900 | 1.43688000  | H | -0.97219700 | 2.97191500  | 4.57140600  |
| H | 3.43313200  | -0.56464900 | 0.36324000  | H | 0.19821400  | 1.65640900  | 4.50666700  |
| H | 4.15455400  | -1.43544400 | 1.70936800  | C | -1.69003800 | -6.51706500 | -2.87550700 |
| H | 3.50407800  | 0.18460500  | 1.96041300  | H | -0.76352500 | -6.01458800 | -3.17144500 |
| C | -2.26192300 | 2.61737800  | -0.79506000 | H | -1.73981800 | -7.46960700 | -3.41663800 |
| H | -2.90497200 | 1.75001800  | -0.97983900 | H | -1.62160500 | -6.73615900 | -1.80491400 |
| H | -1.64819000 | 2.76268400  | -1.68955300 | C | -2.99663900 | -5.38175900 | -4.69670800 |
| H | -2.91395500 | 3.49555900  | -0.70190200 | H | -3.87077500 | -4.77151300 | -4.94699100 |
| C | -4.77841600 | -2.31758700 | 0.25039500  | H | -3.06701100 | -6.32341300 | -5.25387900 |
| C | -2.93017100 | -5.65362800 | -3.18079500 | H | -2.10678300 | -4.85401700 | -5.05471800 |
| C | -0.71581700 | -3.93688200 | 1.57737200  | C | 4.40780100  | 7.03965600  | 2.40970900  |
| H | -1.64506300 | -3.88240000 | 2.15044400  | C | 5.56962900  | 6.26986900  | 2.39191200  |

|   |             |             |             |   |            |            |             |
|---|-------------|-------------|-------------|---|------------|------------|-------------|
| H | -0.22588100 | -4.88203400 | 1.84985800  | C | 5.78414000 | 5.36064000 | 1.35824800  |
| H | -0.98974000 | -4.01012600 | 0.51996700  | C | 4.83708500 | 5.21882000 | 0.34306800  |
| C | -0.86828700 | -2.02055600 | 4.13928300  | C | 3.67410500 | 5.99283500 | 0.36036900  |
| H | -1.90222300 | -2.14136700 | 3.79577700  | C | 3.46191200 | 6.90113400 | 1.39317000  |
| H | -0.83132500 | -1.12941300 | 4.77355800  | H | 4.24003400 | 7.75056800 | 3.21386500  |
| H | -0.65025500 | -2.88226100 | 4.78423700  | H | 6.30950300 | 6.37909600 | 3.17951400  |
| C | -0.33769100 | -1.22508500 | -3.77341400 | H | 6.69144000 | 4.76088600 | 1.34203400  |
| H | -0.90402600 | -1.74413400 | -4.52894000 | H | 2.94603800 | 5.88744100 | -0.43737200 |
| C | -5.29811400 | -0.92588000 | -0.16330000 | H | 2.55765800 | 7.50263100 | 1.40509600  |
| H | -4.49159700 | -0.19112300 | -0.14912200 | C | 5.06018600 | 4.20485400 | -0.73699000 |
| H | -6.08644700 | -0.59489700 | 0.52347300  | F | 4.52733300 | 4.62426300 | -1.92303500 |
| H | -5.72109600 | -0.95682700 | -1.17344300 | F | 4.43202400 | 3.01959800 | -0.43061300 |
| C | 0.67712900  | -0.33679700 | -3.88555100 | H | 6.12033600 | 3.97862400 | -0.90021500 |

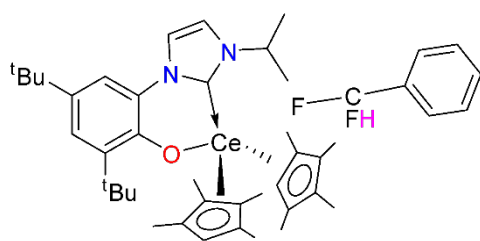

TS :

|    |            |             |             |   |            |             |             |
|----|------------|-------------|-------------|---|------------|-------------|-------------|
| Ce | 5.24956000 | 8.21025400  | 13.28754100 | H | 5.43990800 | 7.93085200  | 7.35210100  |
| O  | 3.25168200 | 7.19437400  | 12.69410700 | C | 8.04779500 | 8.66688400  | 8.92964000  |
| N  | 4.34958100 | 6.63737900  | 10.13921900 | H | 8.37267100 | 7.80116100  | 9.51365300  |
| N  | 5.70517900 | 8.16396000  | 9.49066000  | H | 8.82236100 | 9.43703400  | 8.99224600  |
| C  | 3.23451700 | 10.27979900 | 13.58487500 | H | 7.96628100 | 8.35901900  | 7.88113000  |
| C  | 4.47899500 | 10.89896400 | 13.27193900 | C | 2.02641600 | 10.29792100 | 12.69326900 |
| C  | 3.31721200 | 9.77312200  | 14.90661500 | H | 2.10420600 | 9.58660100  | 11.86293900 |
| C  | 3.54365900 | 5.70663900  | 10.86646900 | H | 1.87376500 | 11.29453400 | 12.26213800 |
| C  | 5.20448200 | 7.59195400  | 10.62469500 | H | 1.11920600 | 10.04598100 | 13.24799900 |
| C  | 5.77488900 | 5.49052700  | 14.17842700 | C | 6.24518700 | 10.42408400 | 8.65544200  |
| C  | 5.31593200 | 10.77237500 | 14.40838200 | H | 6.15289300 | 10.19383700 | 7.58813900  |

|   |            |             |             |   |             |             |             |
|---|------------|-------------|-------------|---|-------------|-------------|-------------|
| H | 6.32447500 | 11.15170800 | 14.49467300 | H | 6.96619300  | 11.24046500 | 8.75423700  |
| C | 7.12571900 | 7.14042400  | 15.01172500 | H | 5.27689100  | 10.78012100 | 9.01582900  |
| H | 7.56338800 | 7.87190800  | 15.68432800 | C | 1.53723100  | 5.82069100  | 14.95638300 |
| C | 6.79546300 | 5.75414900  | 13.22267400 | H | 1.88544400  | 4.84744200  | 15.31826200 |
| C | 7.64865800 | 6.75509600  | 13.75547900 | H | 0.84116700  | 6.22270400  | 15.70233600 |
| C | 4.61493000 | 10.08500500 | 15.41849400 | H | 2.39072300  | 6.49404400  | 14.87942900 |
| C | 5.96922200 | 6.35765300  | 15.28523000 | C | -0.31639500 | 4.67156500  | 13.78868200 |
| C | 2.88847500 | 6.09475700  | 12.06682400 | H | -0.88528400 | 4.51402400  | 12.86599300 |
| C | 3.36386700 | 4.44782700  | 10.29392100 | H | -1.00881500 | 5.06946600  | 14.53870600 |
| H | 3.97394800 | 4.18221200  | 9.43461400  | H | 0.03028500  | 3.69817100  | 14.15304400 |
| C | 1.66467300 | 3.99447000  | 11.88020200 | C | 1.22595200  | 1.30426600  | 10.89906100 |
| H | 0.88949900 | 3.34115500  | 12.25806600 | H | 1.46339800  | 1.15824000  | 11.95809900 |
| C | 1.82712700 | 5.23450200  | 12.50380500 | H | 1.16557400  | 0.31460400  | 10.43359700 |
| C | 2.44170600 | 3.54069200  | 10.80883800 | H | 0.23321500  | 1.76171900  | 10.83055800 |
| C | 6.72496100 | 9.21856000  | 9.46147500  | C | 5.06276500  | 9.93262500  | 16.84164500 |
| H | 6.85496500 | 9.50383300  | 10.50427600 | H | 4.67658600  | 9.02391600  | 17.31178900 |
| C | 7.06500600 | 4.95515500  | 11.98169900 | H | 4.71026500  | 10.77625000 | 17.45182700 |
| H | 6.14385900 | 4.55846100  | 11.54634800 | H | 6.15428600  | 9.91552600  | 16.91935700 |
| H | 7.71766500 | 4.09654500  | 12.19630200 | C | 2.18646000  | 9.22969200  | 15.72622400 |
| H | 7.56224300 | 5.55347400  | 11.21187600 | H | 1.41320200  | 8.77053200  | 15.10793200 |
| C | 8.95466500 | 7.17209300  | 13.15216600 | H | 1.70883400  | 10.02888300 | 16.31120500 |
| H | 8.84134900 | 7.57518200  | 12.13961200 | H | 2.52077200  | 8.47372600  | 16.44424900 |
| H | 9.64388500 | 6.32043300  | 13.08434400 | C | 3.63696200  | 1.39600700  | 10.28283800 |
| H | 9.44792900 | 7.92850500  | 13.76978600 | H | 4.43743400  | 1.93100800  | 9.76207600  |
| C | 4.77483500 | 11.67690900 | 12.02529200 | H | 3.55543700  | 0.39893200  | 9.83344800  |
| H | 4.20803000 | 11.29941600 | 11.16750000 | H | 3.94284000  | 1.27555200  | 11.32719900 |
| H | 5.83647700 | 11.63105100 | 11.77190000 | C | 1.89100000  | 2.27502900  | 8.70486200  |
| H | 4.50501000 | 12.73645900 | 12.13964200 | H | 0.93701300  | 2.80309300  | 8.60381000  |
| C | 0.83586500 | 5.67068100  | 13.59662300 | H | 1.78320300  | 1.28454400  | 8.24697700  |
| C | 2.29395100 | 2.14634500  | 10.18736700 | H | 2.64069700  | 2.82532600  | 8.12707700  |
| C | 4.83928900 | 4.32172200  | 14.14067400 | C | 8.93231800  | 13.11444100 | 15.85804300 |

|   |             |            |             |   |            |             |             |
|---|-------------|------------|-------------|---|------------|-------------|-------------|
| H | 3.95801300  | 4.48568300 | 14.76230800 | C | 9.37396900 | 11.78839100 | 15.92508900 |
| H | 5.34209700  | 3.42085000 | 14.52158700 | C | 9.29590400 | 10.97038300 | 14.80957500 |
| H | 4.48956700  | 4.09369200 | 13.13074200 | C | 8.76849300 | 11.47060400 | 13.59701200 |
| C | 5.23693900  | 6.28476200 | 16.59511600 | C | 8.32592100 | 12.81250500 | 13.53891300 |
| H | 4.15616700  | 6.44026400 | 16.50044500 | C | 8.41262800 | 13.61966200 | 14.66206500 |
| H | 5.62085800  | 7.02763400 | 17.29870000 | H | 8.99373000 | 13.75162300 | 16.73526300 |
| H | 5.37153600  | 5.29986300 | 17.06116100 | H | 9.78067100 | 11.39747500 | 16.85307000 |
| C | 4.31672600  | 6.64321500 | 8.75166100  | H | 9.63672300 | 9.94086700  | 14.86305500 |
| H | 3.65819900  | 6.00400100 | 8.18769300  | H | 7.92345700 | 13.20160200 | 12.61037900 |
| C | 0.20636900  | 7.01057800 | 13.17166600 | H | 8.07171000 | 14.64951600 | 14.61154000 |
| H | 0.97598300  | 7.76527500 | 13.01328000 | C | 8.69660400 | 10.62019500 | 12.46199700 |
| H | -0.48906500 | 7.36841200 | 13.94094900 | F | 8.41425100 | 11.19088600 | 11.29758000 |
| H | -0.35642500 | 6.89134500 | 12.23911600 | F | 7.07752000 | 9.49899300  | 12.53284100 |
| C | 5.17958800  | 7.60106900 | 8.34525200  | H | 9.27093400 | 9.70903000  | 12.37613100 |

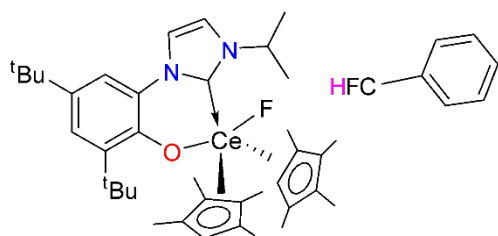

IRC forward :

|    |             |             |             |   |             |            |             |
|----|-------------|-------------|-------------|---|-------------|------------|-------------|
| Ce | -0.21399300 | 0.31803300  | 0.84092300  | H | 0.48323600  | 0.44355000 | -5.02096300 |
| O  | -2.00025100 | -0.84021800 | 0.06752200  | C | 2.86185600  | 1.27190400 | -3.16393000 |
| N  | -0.75401500 | -1.12656800 | -2.44949700 | H | 3.21341800  | 0.43143400 | -2.55985700 |
| N  | 0.52900900  | 0.54269700  | -2.85915300 | H | 3.55114500  | 2.10889800 | -3.01866400 |
| C  | -2.29936900 | 2.18502700  | 1.26024700  | H | 2.90634400  | 0.97922300 | -4.21925200 |
| C  | -1.09644000 | 2.90295800  | 0.99779100  | C | -3.50283800 | 2.20592000 | 0.36454900  |
| C  | -2.18735100 | 1.59496000  | 2.54725600  | H | -3.34874600 | 1.65049800 | -0.56776700 |
| C  | -1.55314800 | -2.15130300 | -1.85884300 | H | -3.75745900 | 3.23677900 | 0.08969100  |
| C  | -0.02838900 | -0.14832600 | -1.82020300 | H | -4.37771100 | 1.77614600 | 0.85682600  |
| C  | 0.62799300  | -2.31996400 | 1.53279300  | C | 0.94537800  | 2.87791400 | -3.56370000 |

|   |             |             |             |   |             |             |             |
|---|-------------|-------------|-------------|---|-------------|-------------|-------------|
| C | -0.26085500 | 2.76092900  | 2.12889500  | H | 1.01667100  | 2.70424800  | -4.64345100 |
| H | 0.72736000  | 3.19171600  | 2.23663300  | H | 1.55359500  | 3.75398000  | -3.32541200 |
| C | 1.39560000  | -0.60419800 | 2.83821800  | H | -0.09456900 | 3.11220600  | -3.32094000 |
| H | 1.52593400  | 0.07350300  | 3.67355700  | C | -3.68914900 | -2.50545300 | 2.13535500  |
| C | 1.74276100  | -1.71491200 | 0.87475800  | H | -3.25970000 | -3.47824000 | 2.39951400  |
| C | 2.24354500  | -0.68248400 | 1.71270000  | H | -4.42895100 | -2.24974400 | 2.90330400  |
| C | -0.91730200 | 1.96048500  | 3.08939900  | H | -2.89852200 | -1.75645100 | 2.15504800  |
| C | 0.40761500  | -1.62759400 | 2.74966800  | C | -5.44787000 | -3.64429900 | 0.81670600  |
| C | -2.28336600 | -1.90449300 | -0.66777900 | H | -5.98218300 | -3.74953600 | -0.13356900 |
| C | -1.64036100 | -3.36416100 | -2.54025400 | H | -6.18157200 | -3.35421100 | 1.57651100  |
| H | -0.97894600 | -3.53100700 | -3.38545800 | H | -5.05530500 | -4.62589000 | 1.10430700  |
| C | -3.37657700 | -4.03855000 | -1.07558000 | C | -3.64495700 | -6.64203800 | -2.32085300 |
| H | -4.12840000 | -4.76046500 | -0.78788500 | H | -3.46280600 | -6.87318100 | -1.26603200 |
| C | -3.30574100 | -2.85014600 | -0.34215800 | H | -3.63204400 | -7.58768000 | -2.87313600 |
| C | -2.53509300 | -4.35536700 | -2.14590500 | H | -4.65237000 | -6.22195500 | -2.41116500 |
| C | 1.45089000  | 1.68786800  | -2.75065200 | C | -0.47738400 | 1.76933400  | 4.51038700  |
| H | 1.45578500  | 1.94194900  | -1.69270100 | H | -0.63382000 | 0.75232200  | 4.88268400  |
| C | 2.40643100  | -2.22407800 | -0.37010800 | H | -1.03888600 | 2.43832900  | 5.17642200  |
| H | 1.69089300  | -2.67648900 | -1.06212200 | H | 0.58230600  | 2.01217100  | 4.63242500  |
| H | 3.15523900  | -2.99191600 | -0.13000600 | C | -3.28370400 | 0.92356500  | 3.31800700  |
| H | 2.92560300  | -1.42408400 | -0.90512300 | H | -4.04819200 | 0.50116000  | 2.66301100  |
| C | 3.49673600  | 0.10471100  | 1.49392000  | H | -3.78206900 | 1.64024900  | 3.98572400  |
| H | 3.54329400  | 0.52664800  | 0.48673000  | H | -2.91301200 | 0.11112600  | 3.95089600  |
| H | 4.38247700  | -0.52688300 | 1.63935300  | C | -1.20749700 | -6.39212100 | -2.76726000 |
| H | 3.56156400  | 0.93326000  | 2.20530600  | H | -0.40397900 | -5.78292200 | -3.19329700 |
| C | -0.84006000 | 3.75898600  | -0.20478100 | H | -1.21415300 | -7.35171000 | -3.29762500 |
| H | -1.17339000 | 3.27910000  | -1.13207400 | H | -0.95927800 | -6.58424100 | -1.71828600 |
| H | 0.21956200  | 3.99666600  | -0.31071300 | C | -2.89439400 | -5.45853000 | -4.37895700 |
| H | -1.38801200 | 4.70849900  | -0.13123000 | H | -3.86379900 | -4.96380600 | -4.49937300 |
| C | -4.35125600 | -2.56867600 | 0.75084900  | H | -2.92715600 | -6.41049500 | -4.92149700 |
| C | -2.57788500 | -5.69675300 | -2.88917700 | H | -2.13685400 | -4.83188000 | -4.86069000 |

|   |             |             |             |   |            |            |             |
|---|-------------|-------------|-------------|---|------------|------------|-------------|
| C | -0.03099000 | -3.59482200 | 1.10354200  | C | 7.10369900 | 5.70997900 | 0.97352300  |
| H | -1.05663800 | -3.67673600 | 1.46813600  | C | 6.66139600 | 4.49456400 | 1.51196900  |
| H | 0.52621600  | -4.45928900 | 1.49053000  | C | 5.43925500 | 3.96259700 | 1.14015000  |
| H | -0.06896000 | -3.69606600 | 0.01605500  | C | 4.61061800 | 4.64114400 | 0.20388000  |
| C | -0.52419900 | -2.03395900 | 3.85333800  | C | 5.07265800 | 5.87357500 | -0.33455500 |
| H | -1.18250100 | -2.84862700 | 3.54681900  | C | 6.29869400 | 6.38914100 | 0.05094500  |
| H | -1.16040300 | -1.21392700 | 4.20124000  | H | 8.06357400 | 6.12236200 | 1.26989100  |
| H | 0.04486800  | -2.38473500 | 4.72367000  | H | 7.28165900 | 3.96243900 | 2.22832100  |
| C | -0.65542500 | -1.02495100 | -3.83001700 | H | 5.10245400 | 3.01856600 | 1.55984900  |
| H | -1.20324600 | -1.66607800 | -4.49982000 | H | 4.45014100 | 6.40263800 | -1.04837900 |
| C | -5.04389800 | -1.23113200 | 0.43204900  | H | 6.63736400 | 7.33282900 | -0.36879500 |
| H | -4.31459700 | -0.42368000 | 0.37372100  | C | 3.37661900 | 4.08693000 | -0.16177900 |
| H | -5.78049900 | -0.98798300 | 1.20756000  | F | 2.60428800 | 4.73869700 | -1.05678600 |
| H | -5.57131500 | -1.28873000 | -0.52645400 | F | 1.39592000 | 1.53678900 | 0.17894400  |
| C | 0.15958200  | 0.02284900  | -4.08247000 | H | 2.93269200 | 3.16354400 | 0.19291700  |

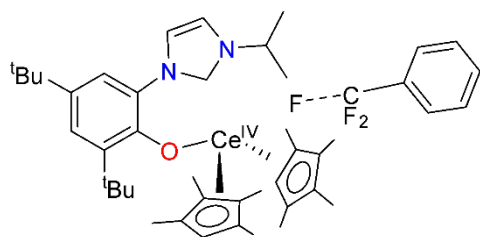

IRC reverse :

|    |             |             |             |   |             |            |             |
|----|-------------|-------------|-------------|---|-------------|------------|-------------|
| Ce | 0.11064900  | -0.37722400 | 1.16346500  | H | 0.53485300  | 2.10517100 | -2.00460700 |
| O  | -1.75049700 | -1.35016800 | 0.44707400  | C | 0.80094800  | 1.59269200 | -5.25271400 |
| N  | -1.21694500 | -0.64582600 | -2.16563300 | H | -0.15629000 | 1.24531500 | -5.65089100 |
| N  | 0.39003900  | 0.29557700  | -3.20465400 | H | 1.49264800  | 1.73627900 | -6.08867000 |
| C  | -1.51863700 | 1.64661500  | 2.30897400  | H | 0.64397200  | 2.56610800 | -4.77495700 |
| C  | -0.50655500 | 2.36960100  | 1.62246600  | C | -2.99095200 | 1.70040300 | 2.01884900  |
| C  | -0.90689500 | 0.96327900  | 3.40171200  | H | -3.19173900 | 2.03066300 | 0.99453700  |
| C  | -2.28734300 | -1.53787400 | -1.84601600 | H | -3.50470600 | 2.40610900 | 2.68551100  |
| C  | -0.38256500 | -0.83595500 | -3.23558200 | H | -3.47610400 | 0.72751600 | 2.14412200  |
| C  | 1.22459700  | -2.94992300 | 0.93474500  | C | 2.72024300  | 1.00596000 | -3.70106800 |



|   |             |             |             |   |             |             |             |
|---|-------------|-------------|-------------|---|-------------|-------------|-------------|
| C | 0.72347600  | 2.11953900  | 2.28792700  | H | 2.67012000  | 1.97720100  | -3.20016700 |
| H | 1.68054200  | 2.55697200  | 2.02014200  | H | 3.44255600  | 1.09812700  | -4.51783400 |
| C | 2.38269900  | -1.48357000 | 2.25736300  | H | 3.10394700  | 0.27003100  | -2.99006300 |
| H | 2.78705600  | -0.98288600 | 3.12877500  | C | -3.26627100 | -2.72601300 | 2.34650600  |
| C | 2.04281600  | -2.14421800 | 0.09396300  | H | -2.23378200 | -3.07472700 | 2.27842000  |
| C | 2.76117700  | -1.22983600 | 0.91806100  | H | -3.69971700 | -3.11816100 | 3.27456600  |
| C | 0.48335600  | 1.27710500  | 3.39992500  | H | -3.24704400 | -1.63754400 | 2.40896600  |
| C | 1.43301400  | -2.53918200 | 2.28035500  | C | -4.10706200 | -4.75727300 | 1.21873100  |
| C | -2.54419900 | -1.86859000 | -0.48676300 | H | -4.76808800 | -5.20717600 | 0.47266200  |
| C | -3.02647700 | -2.05393800 | -2.89754600 | H | -4.44310700 | -5.09839300 | 2.20509400  |
| H | -2.73725800 | -1.75693200 | -3.90057700 | H | -3.09910500 | -5.14970800 | 1.04901400  |
| C | -4.35389400 | -3.23734100 | -1.32847100 | C | -6.00052600 | -4.45402700 | -3.38259600 |
| H | -5.18209200 | -3.90352300 | -1.11480200 | H | -5.60233800 | -5.31519000 | -2.83524600 |
| C | -3.62896700 | -2.74593000 | -0.22943100 | H | -6.53858000 | -4.83828900 | -4.25586300 |
| C | -4.08448100 | -2.93456800 | -2.66181500 | H | -6.73124000 | -3.94822000 | -2.74216200 |
| C | 1.36879200  | 0.57529500  | -4.26279300 | C | 1.45802700  | 0.97062400  | 4.49993800  |
| H | 1.47664100  | -0.38862200 | -4.76837200 | H | 1.36565000  | -0.05074000 | 4.88419300  |
| C | 2.23301900  | -2.35366000 | -1.38077500 | H | 1.30035400  | 1.64379700  | 5.35362400  |
| H | 1.32473200  | -2.20139000 | -1.97782200 | H | 2.49135600  | 1.10947700  | 4.16812300  |
| H | 2.57195600  | -3.37771000 | -1.58306200 | C | -3.93742600 | -4.28918600 | -4.76803200 |
| H | 2.99968000  | -1.68083800 | -1.77582000 | H | -3.13346300 | -3.65590000 | -5.15476700 |
| C | 3.80527000  | -0.24133200 | 0.47613400  | H | -4.48779700 | -4.69389700 | -5.62585700 |
| H | 3.44129900  | 0.48578800  | -0.26049000 | H | -3.47345000 | -5.12546700 | -4.23476000 |
| H | 4.66698600  | -0.74591900 | 0.02039800  | C | -5.53011000 | -2.35006800 | -4.63106800 |
| H | 4.17984800  | 0.32903800  | 1.33144800  | H | -6.21946500 | -1.77997800 | -3.99923300 |
| C | -0.71480600 | 3.39763000  | 0.54574100  | H | -6.09409300 | -2.73921200 | -5.48720400 |
| H | -1.44679000 | 3.10084700  | -0.21317500 | H | -4.77804400 | -1.65442900 | -5.01581700 |
| H | 0.22167900  | 3.63477400  | 0.03488200  | C | 6.31513800  | 5.67449300  | 1.67815600  |
| H | -1.08637200 | 4.33619400  | 0.97826500  | C | 6.64239100  | 5.00685200  | 0.49861600  |
| C | -4.11066400 | -3.21449200 | 1.16182100  | C | 5.64353000  | 4.65970000  | -0.40715400 |
| C | -4.88504600 | -3.50441700 | -3.83934600 | C | 4.31533200  | 4.98507800  | -0.12809100 |

|   |             |             |             |   |             |             |             |
|---|-------------|-------------|-------------|---|-------------|-------------|-------------|
| C | 0.39389900  | -4.11093700 | 0.47312000  | C | 3.98344000  | 5.65442500  | 1.05136500  |
| H | -0.34154300 | -4.40682900 | 1.22665600  | C | 4.98681100  | 5.99783300  | 1.95329000  |
| H | 1.02195900  | -4.99032500 | 0.27393500  | H | 7.09628900  | 5.94572500  | 2.38259700  |
| H | -0.15226800 | -3.88884400 | -0.44871200 | H | 7.67692600  | 4.75838800  | 0.28113500  |
| C | 0.87457900  | -3.19180000 | 3.51390800  | H | 5.89217000  | 4.14644600  | -1.33023100 |
| H | -0.19608400 | -3.41186500 | 3.43484100  | H | 2.94903800  | 5.91062400  | 1.25615700  |
| H | 1.01742600  | -2.55934800 | 4.39580000  | H | 4.73099600  | 6.52138200  | 2.86964300  |
| H | 1.37665900  | -4.14616600 | 3.71997700  | C | 3.22939000  | 4.57143500  | -1.07687100 |
| C | -0.97515300 | 0.55684600  | -1.50757700 | F | 3.66725200  | 4.47199800  | -2.34618300 |
| H | -1.62242100 | 0.93869100  | -0.73149500 | F | 2.19113000  | 5.42685900  | -1.07002200 |
| C | -5.54944300 | -2.70285600 | 1.38742800  | F | 2.72033300  | 3.35144600  | -0.75293200 |
| H | -5.58064400 | -1.60833200 | 1.36514900  | C | -1.62516800 | 0.20121900  | 4.47932900  |
| H | -5.92341300 | -3.03361700 | 2.36397700  | H | -1.85614900 | 0.84890800  | 5.33628400  |
| H | -6.24156100 | -3.06965800 | 0.62380200  | H | -2.57480000 | -0.21054300 | 4.12677100  |
| C | 0.05471000  | 1.15359800  | -2.17665800 | H | -1.02968800 | -0.63284800 | 4.86609200  |

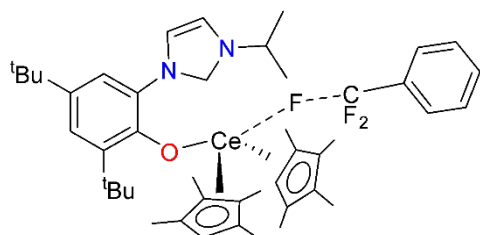

TS :

|    |            |             |             |   |            |             |             |
|----|------------|-------------|-------------|---|------------|-------------|-------------|
| Ce | 4.71730000 | 8.66346200  | 13.49150000 | H | 4.82619200 | 11.15699700 | 8.68254400  |
| O  | 3.06414600 | 7.99629700  | 12.18841700 | C | 5.12232300 | 10.06777700 | 5.76442100  |
| N  | 3.40007900 | 8.32586300  | 9.42042700  | H | 4.11462200 | 9.74963300  | 5.48311900  |
| N  | 4.78970700 | 9.08656600  | 8.00111400  | H | 5.75643400 | 10.03792200 | 4.87262500  |
| C  | 2.82030200 | 10.17193600 | 15.08148300 | H | 5.07070300 | 11.10921900 | 6.10139000  |
| C  | 3.65905700 | 11.08394400 | 14.38097900 | C | 1.32784700 | 10.11117000 | 14.92797100 |
| C  | 3.61195400 | 9.50027500  | 16.05295300 | H | 1.01532900 | 9.95633500  | 13.88902100 |
| C  | 2.39195900 | 7.48066900  | 9.97169200  | H | 0.86933000 | 11.05109600 | 15.26259900 |
| C  | 4.15921000 | 7.92713600  | 8.34439300  | H | 0.88584700 | 9.31138000  | 15.52678100 |

|   |             |             |             |   |             |             |             |
|---|-------------|-------------|-------------|---|-------------|-------------|-------------|
| C | 5.56887700  | 5.95375300  | 13.22671500 | C | 7.10556400  | 9.55596600  | 7.26359400  |
| C | 4.95414200  | 10.99334600 | 14.94891800 | H | 7.13345200  | 10.57306100 | 7.66851200  |
| H | 5.82023500  | 11.56984400 | 14.64619200 | H | 7.77404000  | 9.52427300  | 6.39727300  |
| C | 6.79050300  | 7.24559900  | 14.66834000 | H | 7.49425300  | 8.87368100  | 8.02418200  |
| H | 7.21153000  | 7.64512900  | 15.58389800 | C | 1.83141600  | 6.60715300  | 14.32747100 |
| C | 6.48314900  | 6.73980600  | 12.46098000 | H | 2.81823900  | 6.17609000  | 14.14418500 |
| C | 7.26035700  | 7.51560800  | 13.36355400 | H | 1.50140100  | 6.27375100  | 15.31853700 |
| C | 4.93872400  | 10.02496900 | 15.97824800 | H | 1.91953400  | 7.69213700  | 14.34964900 |
| C | 5.75979100  | 6.26625500  | 14.59760000 | C | 0.67865200  | 4.61033800  | 13.47587900 |
| C | 2.23570300  | 7.33001700  | 11.37839300 | H | -0.12683100 | 4.17288600  | 12.88068400 |
| C | 1.58361200  | 6.82240700  | 9.05711600  | H | 0.45646800  | 4.39209800  | 14.52703600 |
| H | 1.79791900  | 6.99203000  | 8.00717700  | H | 1.60691000  | 4.09529400  | 13.20993800 |
| C | 0.39557300  | 5.83537400  | 10.84661300 | C | -1.39117800 | 4.37763800  | 9.08664900  |
| H | -0.40625200 | 5.19977700  | 11.20285200 | H | -0.93953100 | 3.58803800  | 9.69696600  |
| C | 1.19803700  | 6.45824300  | 11.81732500 | H | -1.99132600 | 3.89142000  | 8.30995400  |
| C | 0.55669700  | 5.97505700  | 9.47170300  | H | -2.07586700 | 4.95196700  | 9.72019700  |
| C | 5.69051000  | 9.15488600  | 6.85133000  | C | 6.04281300  | 9.77271300  | 16.96238600 |
| H | 5.70506000  | 8.12566300  | 6.48024300  | H | 6.04181100  | 8.74533600  | 17.33899300 |
| C | 6.66511000  | 6.65887900  | 10.97465200 | H | 5.94026600  | 10.42986000 | 17.83699700 |
| H | 5.71864900  | 6.53587700  | 10.43925200 | H | 7.02700700  | 9.96922800  | 16.52565200 |
| H | 7.30470000  | 5.80874800  | 10.69895000 | C | 0.55235900  | 4.38969900  | 7.52757100  |
| H | 7.14098300  | 7.56218200  | 10.58223500 | H | 1.31849200  | 4.97632600  | 7.01182300  |
| C | 8.44677400  | 8.35956600  | 13.01478300 | H | -0.06056500 | 3.89336500  | 6.76570600  |
| H | 8.32050500  | 8.85183900  | 12.04787700 | H | 1.06378300  | 3.61695200  | 8.11089500  |
| H | 9.35673100  | 7.74761000  | 12.95485800 | C | -1.04688900 | 6.32798900  | 7.57434800  |
| H | 8.62327500  | 9.13408700  | 13.76750800 | H | -1.68828400 | 6.96506100  | 8.19265500  |
| C | 3.19344700  | 12.05814100 | 13.33812600 | H | -1.67471100 | 5.84385800  | 6.81676400  |
| H | 2.34744100  | 11.66655300 | 12.76336900 | H | -0.33590200 | 6.97659800  | 7.05367300  |
| H | 3.98513800  | 12.30591600 | 12.62755100 | C | 9.27147400  | 13.59608900 | 14.15991100 |
| H | 2.85341800  | 12.99820100 | 13.79476400 | C | 9.80779300  | 12.53149300 | 13.42887500 |
| C | 0.81755600  | 6.13723200  | 13.27990800 | C | 9.03044000  | 11.85154300 | 12.50474500 |

|   |             |             |             |   |             |             |             |
|---|-------------|-------------|-------------|---|-------------|-------------|-------------|
| C | -0.32718800 | 5.27156300  | 8.43577400  | C | 7.68656100  | 12.23736900 | 12.30017500 |
| C | 4.70267500  | 4.86737800  | 12.66082900 | C | 7.15026400  | 13.31784200 | 13.03715000 |
| H | 4.11776400  | 4.37408400  | 13.44220900 | C | 7.94359000  | 13.98546200 | 13.95634100 |
| H | 5.31843300  | 4.09321000  | 12.18512500 | H | 9.88681800  | 14.12267600 | 14.88315700 |
| H | 4.00401800  | 5.23162700  | 11.90012200 | H | 10.84138500 | 12.23492300 | 13.58003900 |
| C | 5.17985100  | 5.54699400  | 15.78220100 | H | 9.44847700  | 11.03265700 | 11.93106000 |
| H | 4.10382800  | 5.36593600  | 15.70221600 | H | 6.12228400  | 13.62272900 | 12.87623600 |
| H | 5.35249600  | 6.10903500  | 16.70512100 | H | 7.52811800  | 14.81614900 | 14.51870300 |
| H | 5.65829400  | 4.56709300  | 15.91226200 | C | 6.88054600  | 11.54990500 | 11.35225700 |
| C | 3.55072000  | 9.67519700  | 9.71306500  | F | 7.43487300  | 10.78039200 | 10.45333600 |
| H | 3.01575400  | 10.16321200 | 10.51152500 | F | 5.77548400  | 12.10339600 | 10.91822400 |
| C | -0.53794300 | 6.80298500  | 13.59623600 | F | 5.94967000  | 10.01578200 | 12.22590000 |
| H | -0.47383000 | 7.89060700  | 13.49209200 | C | 3.11228500  | 8.58369100  | 17.13150600 |
| H | -0.84816300 | 6.57639800  | 14.62396400 | H | 2.88895200  | 9.14159900  | 18.05119400 |
| H | -1.32503500 | 6.45067600  | 12.92241400 | H | 2.19612600  | 8.06382000  | 16.84051400 |
| C | 4.43378600  | 10.16030200 | 8.80648800  | H | 3.84992200  | 7.81968200  | 17.39434600 |

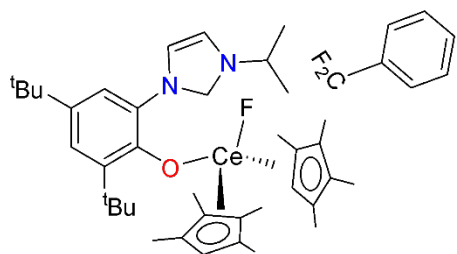

IRC forward :

|    |             |             |             |   |             |            |             |
|----|-------------|-------------|-------------|---|-------------|------------|-------------|
| Ce | 0.22057000  | -0.17526000 | 0.87701400  | H | -0.88492300 | 2.59832700 | -3.47569200 |
| O  | -1.68795800 | -1.01660900 | 0.24879900  | C | 0.76396500  | 1.16690800 | -5.81902000 |
| N  | -1.57258000 | -0.41409400 | -2.45292200 | H | 0.15157700  | 0.37371400 | -6.25728900 |
| N  | -0.07003000 | 0.58209400  | -3.57560000 | H | 1.66837900  | 1.28134200 | -6.42515500 |
| C  | -1.22217900 | 1.83391300  | 2.14466000  | H | 0.20243300  | 2.10615200 | -5.87740000 |
| C  | -0.12249000 | 2.47160600  | 1.50065500  | C | -2.66459500 | 2.05507300 | 1.79765700  |
| C  | -0.71360400 | 1.08305600  | 3.24549500  | H | -2.80487900 | 2.19075300 | 0.72096500  |
| C  | -2.43902400 | -1.43343400 | -1.95424600 | H | -3.05075600 | 2.95874000 | 2.28831100  |

|   |             |             |             |   |             |             |             |
|---|-------------|-------------|-------------|---|-------------|-------------|-------------|
| C | -0.40571100 | -0.66282300 | -3.12936800 | H | -3.30021400 | 1.22194300  | 2.10792000  |
| C | 1.17825500  | -2.72917200 | 0.38133000  | C | 2.01540700  | 1.89484000  | -3.72778200 |
| C | 1.05000000  | 2.09675700  | 2.19585000  | H | 1.55650000  | 2.88815400  | -3.78925600 |
| H | 2.05437500  | 2.42643400  | 1.95250700  | H | 2.97902500  | 1.94733100  | -4.24416400 |
| C | 2.11522700  | -1.65042900 | 2.16962300  | H | 2.18234900  | 1.66116500  | -2.67522700 |
| H | 2.36874800  | -1.37411800 | 3.18535800  | C | -3.18500800 | -2.05280000 | 2.39545200  |
| C | 2.18901300  | -1.84873300 | -0.10744700 | H | -2.11797900 | -2.27539000 | 2.41181400  |
| C | 2.77044900  | -1.18145100 | 1.00281800  | H | -3.59423300 | -2.28398900 | 3.38599900  |
| C | 0.69866600  | 1.25408100  | 3.28008000  | H | -3.30108500 | -0.98282200 | 2.21661600  |
| C | 1.14492700  | -2.61631100 | 1.79998700  | C | -3.70165900 | -4.36886200 | 1.65780500  |
| C | -2.53977000 | -1.65986200 | -0.55671900 | H | -4.28988200 | -5.02482400 | 1.00940800  |
| C | -3.18195600 | -2.14532200 | -2.88042200 | H | -3.98523900 | -4.58541000 | 2.69446900  |
| H | -3.01467700 | -1.92242000 | -3.92996800 | H | -2.64863000 | -4.64055300 | 1.53188900  |
| C | -4.25474800 | -3.27726300 | -1.09950000 | C | -5.86089500 | -4.91618500 | -2.87454000 |
| H | -4.98723400 | -3.99636800 | -0.75066300 | H | -5.33621800 | -5.65088800 | -2.25445300 |
| C | -3.53081100 | -2.57814200 | -0.11795400 | H | -6.39420100 | -5.46606400 | -3.65732300 |
| C | -4.10190400 | -3.11542900 | -2.47419600 | H | -6.61216100 | -4.41612000 | -2.25361500 |
| C | 1.13238700  | 0.83007700  | -4.37424500 | C | 1.59759800  | 0.85172800  | 4.41053600  |
| H | 1.65641400  | -0.12985500 | -4.35819100 | H | 1.34105900  | -0.12693100 | 4.82801100  |
| C | 2.61057700  | -1.72237000 | -1.53850400 | H | 1.51931800  | 1.57615800  | 5.23257200  |
| H | 1.74784900  | -1.66254800 | -2.21336200 | H | 2.64739300  | 0.82757200  | 4.10510200  |
| H | 3.21424800  | -2.58953700 | -1.83875600 | C | -3.90646000 | -4.69870700 | -4.40634300 |
| H | 3.21842700  | -0.82738700 | -1.69211200 | H | -3.20561400 | -4.03191800 | -4.91745500 |
| C | 3.90840600  | -0.20598100 | 0.95155700  | H | -4.44781700 | -5.26716400 | -5.17185400 |
| H | 3.74419000  | 0.58168100  | 0.20954500  | H | -3.31794800 | -5.40396300 | -3.81033800 |
| H | 4.84541000  | -0.71088200 | 0.68346000  | C | -5.71067200 | -2.94825200 | -4.39477600 |
| H | 4.06410100  | 0.27207700  | 1.92310600  | H | -6.42289200 | -2.37754200 | -3.78949800 |
| C | -0.19891700 | 3.41991000  | 0.34240300  | H | -6.27579200 | -3.50326900 | -5.15280100 |
| H | -0.82180900 | 3.03438700  | -0.47151800 | H | -5.06847500 | -2.23280800 | -4.91724800 |
| H | 0.79292600  | 3.60668400  | -0.07308800 | C | 5.99203000  | 5.59646000  | 2.71942400  |
| H | -0.62454200 | 4.38262300  | 0.65436900  | C | 6.53276500  | 4.43908600  | 2.14467800  |

|   |             |             |             |   |             |            |             |
|---|-------------|-------------|-------------|---|-------------|------------|-------------|
| C | -3.93250800 | -2.87661600 | 1.34267700  | C | 5.95828700  | 3.86820100 | 1.02291600  |
| C | -4.89167300 | -3.91500000 | -3.51683500 | C | 4.80099200  | 4.45691500 | 0.43974300  |
| C | 0.38705800  | -3.67527600 | -0.47026900 | C | 4.25877700  | 5.63380100 | 1.02854000  |
| H | -0.56044100 | -3.95610500 | -0.00296700 | C | 4.85399600  | 6.18230100 | 2.15047500  |
| H | 0.95097400  | -4.60046000 | -0.65113100 | H | 6.45174800  | 6.03612200 | 3.59915600  |
| H | 0.15579800  | -3.23736900 | -1.44654300 | H | 7.41462900  | 3.97927600 | 2.58239200  |
| C | 0.37300900  | -3.47873200 | 2.75371900  | H | 6.38096700  | 2.97260100 | 0.58019500  |
| H | -0.54169400 | -3.87537100 | 2.30655300  | H | 3.37711000  | 6.09043600 | 0.59174500  |
| H | 0.09529500  | -2.94066800 | 3.66649800  | H | 4.42830300  | 7.07845000 | 2.59349500  |
| H | 0.97510000  | -4.34289900 | 3.06474100  | C | 4.22987900  | 3.91227700 | -0.71052400 |
| C | -1.94570000 | 0.92555200  | -2.49387300 | F | 4.61966200  | 2.76805500 | -1.25190600 |
| H | -2.85525000 | 1.29217300  | -2.04328000 | F | 3.10595000  | 4.35863000 | -1.25197700 |
| C | -5.43359900 | -2.55428000 | 1.51871300  | F | 1.06164200  | 0.84651400 | -0.69830700 |
| H | -5.63035800 | -1.49704900 | 1.31188300  | C | -1.51776500 | 0.40307600 | 4.31435600  |
| H | -5.74423600 | -2.76233100 | 2.54947400  | H | -1.56019400 | 1.02300700 | 5.22021600  |
| H | -6.07011800 | -3.14663100 | 0.85571000  | H | -2.54756500 | 0.22172400 | 4.00077000  |
| C | -0.98220000 | 1.55750100  | -3.20715300 | H | -0.88492300 | 2.59832700 | -3.47569201 |

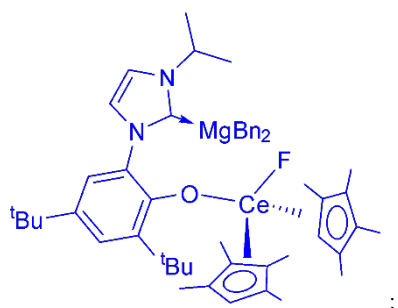

|    |             |             |             |   |             |             |             |
|----|-------------|-------------|-------------|---|-------------|-------------|-------------|
| Ce | 0.13468600  | -0.18153600 | 1.20502600  | H | -3.72311400 | 0.59114400  | 2.36578400  |
| O  | -1.39865900 | -1.03362600 | -0.08265100 | C | 2.37670600  | 0.04535100  | -4.93658100 |
| N  | -1.36434900 | -0.51081400 | -2.82702300 | H | 2.74807100  | 0.72043000  | -4.15768900 |
| N  | 0.02170200  | 0.31158400  | -4.24143100 | H | 3.05477900  | 0.10321400  | -5.79286200 |
| C  | -1.76088400 | 1.50215000  | 2.40242400  | H | 2.40513600  | -0.97851800 | -4.55441100 |
| C  | -0.75533300 | 2.33253600  | 1.82845300  | C | -2.40707500 | -2.45530300 | 2.10192800  |
| C  | -1.19050600 | 0.83318700  | 3.52749000  | H | -1.39528000 | -2.75378800 | 1.81664500  |

|   |             |             |             |    |             |             |             |
|---|-------------|-------------|-------------|----|-------------|-------------|-------------|
| C | -2.32639100 | -1.38888100 | -2.24082900 | H  | -2.60452800 | -2.86000600 | 3.10077400  |
| C | -0.65297900 | -0.82554800 | -3.95102300 | H  | -2.45837900 | -1.36666700 | 2.17234300  |
| C | 1.44259300  | -2.63445000 | 1.05642000  | C  | -3.35176500 | -4.54806500 | 1.19689700  |
| C | 0.42416400  | 2.15851800  | 2.59282800  | H  | -4.12751900 | -5.04541100 | 0.60910100  |
| H | 1.36932700  | 2.65848600  | 2.40930500  | H  | -3.46218700 | -4.88201800 | 2.23510800  |
| C | 2.33869900  | -1.12784700 | 2.52892000  | H  | -2.38220600 | -4.89621700 | 0.82728100  |
| H | 2.62899000  | -0.64347500 | 3.45259700  | C  | -6.31973500 | -4.29121000 | -2.81766200 |
| C | 2.23109700  | -1.69889900 | 0.32092800  | H  | -5.88043700 | -5.14157900 | -2.28526800 |
| C | 2.80677600  | -0.78022100 | 1.24103200  | H  | -7.04190500 | -4.69551600 | -3.53421400 |
| C | 0.16332300  | 1.25527800  | 3.65107200  | H  | -6.87519200 | -3.68083200 | -2.09707000 |
| C | 1.50602200  | -2.27533200 | 2.43172100  | C  | 1.05034000  | 0.99574300  | 4.83175900  |
| C | -2.31096300 | -1.64787400 | -0.84150400 | H  | 1.03210900  | -0.04811100 | 5.16094200  |
| C | -3.26037200 | -1.96266300 | -3.09505000 | H  | 0.72549300  | 1.60212200  | 5.68787700  |
| H | -3.23649200 | -1.67196700 | -4.14257800 | H  | 2.08835600  | 1.26806700  | 4.62185900  |
| C | -4.20029400 | -3.10817700 | -1.24910900 | C  | -4.53272700 | -4.40688800 | -4.55272500 |
| H | -4.94349800 | -3.78523200 | -0.84553500 | H  | -3.79024900 | -3.86921100 | -5.15032800 |
| C | -3.28202900 | -2.55430900 | -0.34239200 | H  | -5.24870100 | -4.86167100 | -5.24684400 |
| C | -4.23201400 | -2.84679300 | -2.61564900 | H  | -4.01717400 | -5.21277100 | -4.01993100 |
| C | 0.96554100  | 0.43428000  | -5.37138100 | C  | -5.98371900 | -2.36184500 | -4.35421600 |
| H | 0.60769800  | -0.27425400 | -6.12491300 | H  | -6.50519200 | -1.67532800 | -3.67882400 |
| C | 2.47959400  | -1.71862000 | -1.15556300 | H  | -6.72451400 | -2.80178800 | -5.03101200 |
| H | 1.69445500  | -2.25603100 | -1.69377200 | H  | -5.29318300 | -1.77346700 | -4.96566100 |
| H | 3.43127400  | -2.21519800 | -1.38646800 | F  | 0.95500000  | 1.03309700  | -0.23793100 |
| H | 2.52853700  | -0.70434500 | -1.56104900 | C  | -1.91693500 | 0.01680100  | 4.55675700  |
| C | 3.76488400  | 0.32221800  | 0.90594300  | H  | -2.06793300 | 0.60266100  | 5.47318300  |
| H | 3.37623200  | 0.96520400  | 0.11043200  | H  | -2.90458800 | -0.30007000 | 4.21447300  |
| H | 4.72464700  | -0.08537700 | 0.56541100  | H  | -1.36414500 | -0.88382600 | 4.84567600  |
| H | 3.96638500  | 0.94772300  | 1.78059200  | Mg | -0.73783000 | -2.82386000 | -4.96884500 |
| C | -0.92442500 | 3.29686800  | 0.69306900  | C  | -1.67141800 | -2.80944100 | -6.92884700 |
| H | -1.80814900 | 3.06821900  | 0.08931600  | H  | -2.74912400 | -2.60818800 | -6.90435100 |
| H | -0.05153700 | 3.28860000  | 0.03529800  | H  | -1.52882300 | -3.83244400 | -7.30074800 |

|   |             |             |             |   |             |             |             |
|---|-------------|-------------|-------------|---|-------------|-------------|-------------|
| H | -1.05568300 | 4.31931300  | 1.06925500  | C | 0.28005000  | -4.49513700 | -4.04051800 |
| C | -3.44958300 | -3.00846000 | 1.12373300  | H | -0.41650500 | -5.34310700 | -4.02960400 |
| C | -5.25973800 | -3.47143600 | -3.56671100 | H | 0.56992400  | -4.28064700 | -3.00546300 |
| C | 0.79078700  | -3.85413000 | 0.47453500  | C | -0.96838100 | -1.83069300 | -7.78522500 |
| H | 0.19418600  | -4.38713500 | 1.21954800  | C | 0.31386100  | -2.09997000 | -8.31754100 |
| H | 1.54873400  | -4.55722800 | 0.10814300  | C | -1.51379400 | -0.56146700 | -8.07817100 |
| H | 0.13806100  | -3.62120200 | -0.37296600 | C | 0.99672800  | -1.16652900 | -9.09216600 |
| C | 0.97728800  | -3.05602600 | 3.59984100  | H | 0.77084800  | -3.06861900 | -8.12098200 |
| H | 0.03941800  | -3.57315400 | 3.37978700  | C | -0.83118300 | 0.37107600  | -8.85574700 |
| H | 0.80655500  | -2.41238400 | 4.46860200  | H | -2.50678600 | -0.31989000 | -7.70254500 |
| H | 1.69937000  | -3.82286200 | 3.90904500  | C | 0.43334100  | 0.08110500  | -9.37089200 |
| C | -1.13610300 | 0.79470000  | -2.43753500 | H | 1.97688200  | -1.42112500 | -9.48977900 |
| H | -1.61656600 | 1.23494500  | -1.58171400 | H | -1.29837600 | 1.32984100  | -9.07242800 |
| C | -4.83692700 | -2.56425600 | 1.63426000  | H | 0.96151000  | 0.80405400  | -9.98662000 |
| H | -4.94025000 | -1.47511000 | 1.59058800  | C | 1.45861100  | -4.77829300 | -4.89021600 |
| H | -4.97719500 | -2.87989200 | 2.67477100  | C | 1.35688800  | -5.55549100 | -6.06544000 |
| H | -5.65059000 | -2.99650400 | 1.04533000  | C | 2.73335800  | -4.24177500 | -4.60611000 |
| C | -0.25340900 | 1.31100800  | -3.32623700 | C | 2.45012400  | -5.77490100 | -6.89845700 |
| H | 0.19218500  | 2.29067400  | -3.37188800 | H | 0.39522200  | -5.99921200 | -6.31744700 |
| C | 0.91230400  | 1.83137700  | -5.98001900 | C | 3.82714200  | -4.45937100 | -5.43993700 |
| H | -0.11412800 | 2.11945900  | -6.22028400 | H | 2.86347100  | -3.65700100 | -3.69694300 |
| H | 1.48231200  | 1.82934800  | -6.91159500 | C | 3.69816900  | -5.22644500 | -6.59783600 |
| H | 1.35283800  | 2.58619300  | -5.31890300 | H | 2.32678800  | -6.38605600 | -7.79006500 |
| C | -3.20264900 | 1.47402200  | 1.98583800  | H | 4.79300800  | -4.03271300 | -5.17662100 |
| H | -3.32294900 | 1.47797200  | 0.89807100  | H | 4.55139300  | -5.39912500 | -7.24772700 |
| H | -3.73708200 | 2.35177500  | 2.37172700  |   |             |             |             |



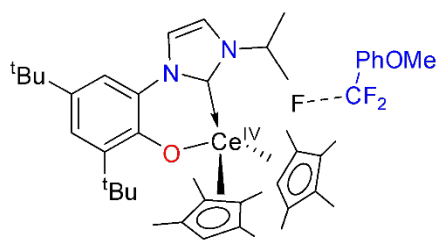

IRC reverse :

|    |          |          |          |   |          |          |          |
|----|----------|----------|----------|---|----------|----------|----------|
| Ce | -0.93141 | -0.31164 | 0.79326  | H | 3.11289  | -0.57822 | -2.21092 |
| O  | -2.74157 | -1.16102 | -0.31207 | H | 3.68918  | 1.08967  | -2.38865 |
| N  | -1.00962 | -1.59693 | -2.52496 | H | 3.05144  | 0.22033  | -3.79195 |
| N  | 0.51061  | -0.09267 | -2.70004 | C | -4.01536 | 1.60368  | 1.84926  |
| C  | -2.57789 | 1.86259  | 1.50105  | H | -4.58239 | 1.25492  | 0.98224  |
| C  | -2.07906 | 2.18330  | 0.21184  | H | -4.50876 | 2.51464  | 2.21568  |
| C  | -1.49625 | 1.94016  | 2.43032  | H | -4.12733 | 0.84928  | 2.63652  |
| C  | -1.97544 | -2.55865 | -2.07631 | C | 1.24540  | 2.23254  | -3.09091 |
| C  | -0.26033 | -0.72865 | -1.77599 | H | 1.35994  | 2.14190  | -4.17649 |
| C  | -0.25976 | -2.90170 | 1.79987  | H | 1.94446  | 2.99775  | -2.74523 |
| C  | -0.69164 | 2.44382  | 0.35157  | H | 0.22796  | 2.57328  | -2.88196 |
| H  | -0.03235 | 2.77829  | -0.44269 | C | -4.73702 | -2.64312 | 1.50990  |
| C  | 0.66755  | -1.11592 | 2.89168  | H | -4.35855 | -3.60068 | 1.88301  |
| H  | 0.85759  | -0.34940 | 3.63596  | H | -5.58673 | -2.35025 | 2.13838  |
| C  | 0.89543  | -2.49085 | 1.07725  | H | -3.95413 | -1.89185 | 1.61752  |
| C  | 1.47451  | -1.38280 | 1.75832  | C | -6.30935 | -3.81187 | -0.00363 |
| C  | -0.32599 | 2.31160  | 1.71603  | H | -6.70717 | -3.94621 | -1.01529 |
| C  | -0.40522 | -2.04505 | 2.92564  | H | -7.13489 | -3.47356 | 0.63189  |
| C  | -2.90258 | -2.24376 | -1.04631 | H | -5.98700 | -4.78871 | 0.37375  |
| C  | -2.01344 | -3.77928 | -2.74968 | C | -4.20294 | -6.94373 | -2.84484 |
| H  | -1.22679 | -3.99554 | -3.46772 | H | -4.20617 | -7.16987 | -1.77334 |
| C  | -4.00731 | -4.34101 | -1.58901 | H | -4.15181 | -7.89610 | -3.38339 |
| H  | -4.82888 | -5.02452 | -1.42012 | H | -5.15856 | -6.47260 | -3.09856 |
| C  | -3.99992 | -3.14180 | -0.87214 | C | 1.00418  | 2.67621  | 2.30941  |
| C  | -3.01685 | -4.71415 | -2.50533 | H | 1.32066  | 1.98516  | 3.09835  |
| C  | 1.53698  | 0.90983  | -2.38487 | H | 0.97390  | 3.67673  | 2.76280  |

|   |          |          |          |   |          |          |          |
|---|----------|----------|----------|---|----------|----------|----------|
| H | 1.46006  | 1.06228  | -1.30466 | H | 1.79064  | 2.69423  | 1.54973  |
| C | 1.49217  | -3.22172 | -0.09018 | C | -1.61882 | 1.82608  | 3.92236  |
| H | 0.72403  | -3.64688 | -0.74364 | H | -2.37532 | 1.09258  | 4.22175  |
| H | 2.12638  | -4.05452 | 0.24543  | H | -1.91536 | 2.78357  | 4.37329  |
| H | 2.11980  | -2.56785 | -0.70326 | H | -0.67319 | 1.53380  | 4.38954  |
| C | 2.77604  | -0.71193 | 1.42234  | C | -1.71601 | -6.82759 | -2.89194 |
| H | 2.90010  | -0.54343 | 0.34639  | H | -0.82262 | -6.26672 | -3.18445 |
| H | 3.63322  | -1.31962 | 1.74299  | H | -1.68786 | -7.79302 | -3.41121 |
| H | 2.86637  | 0.25841  | 1.91935  | H | -1.65126 | -7.01738 | -1.81555 |
| C | -2.88047 | 2.28518  | -1.05455 | C | -3.06831 | -5.83000 | -4.76025 |
| H | -3.45123 | 1.37302  | -1.26010 | H | -3.97857 | -5.28808 | -5.03757 |
| H | -2.22786 | 2.46113  | -1.91534 | H | -3.06339 | -6.78595 | -5.29723 |
| H | -3.59449 | 3.11783  | -1.01250 | H | -2.21158 | -5.24842 | -5.11587 |
| C | -5.18186 | -2.76838 | 0.04104  | C | 6.34506  | 5.90182  | 2.50419  |
| C | -3.00897 | -6.06271 | -3.23753 | C | 6.96515  | 4.78564  | 1.92174  |
| C | -1.07798 | -4.12556 | 1.50791  | C | 6.36147  | 4.12695  | 0.86489  |
| H | -2.04504 | -4.09397 | 2.01647  | C | 5.13041  | 4.57131  | 0.36810  |
| H | -0.56375 | -5.03395 | 1.85161  | C | 4.51565  | 5.67932  | 0.94564  |
| H | -1.27751 | -4.25340 | 0.43922  | C | 5.11462  | 6.34930  | 2.00964  |
| C | -1.41760 | -2.17841 | 4.02869  | H | 7.92108  | 4.45912  | 2.31769  |
| H | -2.42982 | -2.37593 | 3.65735  | H | 6.84873  | 3.26789  | 0.41504  |
| H | -1.45909 | -1.27038 | 4.63817  | H | 3.56369  | 6.03058  | 0.56106  |
| H | -1.16467 | -3.00693 | 4.70377  | H | 4.61869  | 7.21160  | 2.43965  |
| C | -0.71387 | -1.47552 | -3.87542 | C | 4.45556  | 3.82277  | -0.73635 |
| H | -1.23522 | -2.03867 | -4.63182 | F | 5.33781  | 3.27458  | -1.59706 |
| C | -5.77687 | -1.42895 | -0.43889 | F | 3.62549  | 4.60764  | -1.45473 |
| H | -5.02131 | -0.64198 | -0.42467 | F | 3.69938  | 2.79428  | -0.27176 |
| H | -6.60879 | -1.12820 | 0.20925  | O | 7.01516  | 6.47494  | 3.53012  |
| H | -6.16105 | -1.52239 | -1.46058 | C | 6.43760  | 7.60161  | 4.16315  |
| C | 0.25008  | -0.53194 | -3.98361 | H | 5.46581  | 7.35861  | 4.61076  |
| H | 0.74795  | -0.13901 | -4.85578 | H | 7.13277  | 7.89192  | 4.95176  |

|   |         |         |          |   |         |         |         |
|---|---------|---------|----------|---|---------|---------|---------|
| C | 2.93005 | 0.37502 | -2.71435 | H | 6.31567 | 8.43871 | 3.46431 |
|---|---------|---------|----------|---|---------|---------|---------|

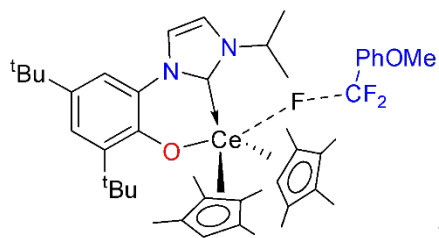

TS :

|    |         |          |          |   |          |          |          |
|----|---------|----------|----------|---|----------|----------|----------|
| Ce | 5.18201 | 8.31051  | 13.20472 | H | 8.44176  | 7.71553  | 9.36156  |
| O  | 3.19727 | 7.27636  | 12.54741 | H | 8.88038  | 9.34872  | 8.83231  |
| N  | 4.40010 | 6.58963  | 10.08322 | H | 7.98006  | 8.28379  | 7.74576  |
| N  | 5.77433 | 8.08701  | 9.41516  | C | 1.68263  | 10.15794 | 13.24323 |
| C  | 3.07509 | 10.25356 | 13.78193 | H | 1.66831  | 9.82478  | 12.20064 |
| C  | 4.15423 | 10.89717 | 13.11247 | H | 1.18119  | 11.13551 | 13.27834 |
| C  | 3.50788 | 9.90212  | 15.08674 | H | 1.07118  | 9.45999  | 13.81774 |
| C  | 3.57756 | 5.68850  | 10.82552 | C | 6.29769  | 10.35668 | 8.60270  |
| C  | 5.23959 | 7.56276  | 10.55680 | H | 6.15240  | 10.13543 | 7.53939  |
| C  | 5.64445 | 5.59920  | 14.16880 | H | 7.03072  | 11.16531 | 8.67394  |
| C  | 5.23311 | 10.96010 | 14.02530 | H | 5.35032  | 10.71764 | 9.01086  |
| H  | 6.20580 | 11.38060 | 13.82378 | C | 1.32302  | 6.25909  | 14.72202 |
| C  | 6.88994 | 7.27221  | 15.10836 | H | 1.75957  | 5.41326  | 15.26483 |
| H  | 7.25994 | 8.01327  | 15.80878 | H | 0.53989  | 6.68768  | 15.35950 |
| C  | 6.74995 | 5.86341  | 13.31083 | H | 2.09714  | 7.00802  | 14.55919 |
| C  | 7.53975 | 6.87511  | 13.91371 | C | -0.33567 | 4.72757  | 13.71859 |
| C  | 4.85823 | 10.33937 | 15.23479 | H | -0.87866 | 4.38711  | 12.83052 |
| C  | 5.72244 | 6.48355  | 15.27933 | H | -1.07239 | 5.16010  | 14.40448 |
| C  | 2.86883 | 6.13879  | 11.97222 | H | 0.10008  | 3.85316  | 14.21484 |
| C  | 3.43587 | 4.39842  | 10.31652 | C | 1.31543  | 1.26236  | 11.01644 |
| H  | 4.08182 | 4.09571  | 9.49649  | H | 1.50947  | 1.18227  | 12.09122 |
| C  | 1.67943 | 4.01261  | 11.85708 | H | 1.28766  | 0.24639  | 10.60791 |
| H  | 0.89750 | 3.37098  | 12.24040 | H | 0.32045  | 1.69934  | 10.87986 |
| C  | 1.79705 | 5.29076  | 12.41024 | C | 5.65355  | 10.35224 | 16.50722 |

|   |          |          |          |   |          |          |          |
|---|----------|----------|----------|---|----------|----------|----------|
| C | 2.50622  | 3.50798  | 10.84755 | H | 5.54677  | 9.42833  | 17.08420 |
| C | 6.79780  | 9.13604  | 9.37345  | H | 5.33159  | 11.17183 | 17.16564 |
| H | 6.95598  | 9.39655  | 10.41908 | H | 6.71981  | 10.49740 | 16.30753 |
| C | 7.13932  | 5.06397  | 12.10210 | C | 2.64118  | 9.41265  | 16.20934 |
| H | 6.26634  | 4.66234  | 11.58002 | H | 1.75610  | 8.88342  | 15.84944 |
| H | 7.77437  | 4.20968  | 12.37720 | H | 2.28519  | 10.25412 | 16.82090 |
| H | 7.70398  | 5.66756  | 11.38486 | H | 3.17496  | 8.73665  | 16.88372 |
| C | 8.89195  | 7.32028  | 13.45668 | C | 3.74843  | 1.35384  | 10.49492 |
| H | 8.90086  | 7.62993  | 12.40815 | H | 4.56323  | 1.86846  | 9.97580  |
| H | 9.62814  | 6.51349  | 13.57338 | H | 3.69670  | 0.33111  | 10.10245 |
| H | 9.23393  | 8.16590  | 14.05793 | H | 4.01296  | 1.29904  | 11.55595 |
| C | 4.09181  | 11.52970 | 11.75250 | C | 2.05925  | 2.11733  | 8.79933  |
| H | 3.57250  | 10.89869 | 11.02100 | H | 1.10482  | 2.62664  | 8.62937  |
| H | 5.09462  | 11.73356 | 11.36764 | H | 1.98085  | 1.10134  | 8.39424  |
| H | 3.55129  | 12.48655 | 11.77715 | H | 2.82650  | 2.64382  | 8.22241  |
| C | 0.72070  | 5.79398  | 13.38721 | C | 10.06267 | 12.45530 | 15.75217 |
| C | 2.40160  | 2.07829  | 10.30198 | C | 10.64095 | 11.31077 | 15.16886 |
| C | 4.72119  | 4.42613  | 14.06472 | C | 10.13825 | 10.79606 | 13.99568 |
| H | 3.74083  | 4.63244  | 14.49901 | C | 9.02974  | 11.41105 | 13.36037 |
| H | 5.14088  | 3.56551  | 14.60623 | C | 8.47035  | 12.57057 | 13.94154 |
| H | 4.55952  | 4.11095  | 13.03121 | C | 8.97774  | 13.08657 | 15.12152 |
| C | 4.87431  | 6.40988  | 16.51523 | H | 11.48918 | 10.85201 | 15.66594 |
| H | 3.80214  | 6.37873  | 16.29821 | H | 10.59548 | 9.92162  | 13.54759 |
| H | 5.05821  | 7.26241  | 17.17510 | H | 7.63988  | 13.06995 | 13.45501 |
| H | 5.10721  | 5.50428  | 17.09229 | H | 8.52884  | 13.97778 | 15.54389 |
| C | 4.40615  | 6.53905  | 8.69641  | C | 8.50808  | 10.88146 | 12.15731 |
| H | 3.76590  | 5.87376  | 8.14137  | F | 9.23467  | 10.06270 | 11.43601 |
| C | -0.00908 | 6.96336  | 12.69678 | F | 7.70273  | 11.60787 | 11.41683 |
| H | 0.69547  | 7.74373  | 12.40896 | F | 7.10411  | 9.42651  | 12.48093 |
| H | -0.76075 | 7.40115  | 13.36551 | O | 10.62633 | 12.87017 | 16.90285 |
| H | -0.52195 | 6.61311  | 11.79425 | C | 10.08238 | 14.00539 | 17.55621 |

|   |         |         |         |   |          |          |          |
|---|---------|---------|---------|---|----------|----------|----------|
| C | 5.28010 | 7.48112 | 8.27731 | H | 9.03368  | 13.84341 | 17.83217 |
| H | 5.57029 | 7.77120 | 7.28000 | H | 10.67629 | 14.14196 | 18.46020 |
| C | 8.09972 | 8.58423 | 8.79263 | H | 10.16234 | 14.90357 | 16.93199 |

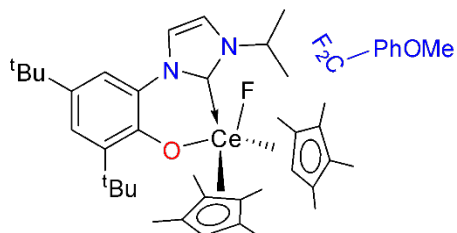

IRC forward :

|    |          |          |          |   |          |          |          |
|----|----------|----------|----------|---|----------|----------|----------|
| Ce | -0.25279 | 0.06936  | 0.50340  | H | 3.02275  | -0.62658 | -3.21920 |
| O  | -2.16116 | -1.00049 | -0.11397 | H | 3.58965  | 0.98323  | -3.68711 |
| N  | -1.06960 | -1.55039 | -2.66158 | H | 2.67537  | -0.00082 | -4.84226 |
| N  | 0.39125  | -0.08886 | -3.23355 | C | -3.36781 | 2.19775  | -0.06031 |
| C  | -2.16132 | 2.13426  | 0.83046  | H | -3.27204 | 1.56942  | -0.95355 |
| C  | -0.90275 | 2.72825  | 0.52430  | H | -3.53974 | 3.22520  | -0.40339 |
| C  | -2.09057 | 1.61174  | 2.15015  | H | -4.26998 | 1.87539  | 0.46420  |
| C  | -1.92957 | -2.45784 | -1.97320 | C | 1.07683  | 2.14075  | -4.05047 |
| C  | -0.18918 | -0.64490 | -2.12731 | H | 0.98233  | 1.92773  | -5.12146 |
| C  | 0.49706  | -2.54079 | 1.32171  | H | 1.84141  | 2.91258  | -3.93154 |
| C  | -0.07110 | 2.57300  | 1.65671  | H | 0.12703  | 2.54928  | -3.69590 |
| H  | 0.95554  | 2.91165  | 1.73202  | C | -3.84354 | -2.38589 | 2.13317  |
| C  | 1.34006  | -0.80292 | 2.54729  | H | -3.47615 | -3.37286 | 2.43579  |
| H  | 1.50813  | -0.10124 | 3.35512  | H | -4.50860 | -2.02124 | 2.92515  |
| C  | 1.63488  | -2.01212 | 0.63681  | H | -2.99456 | -1.70815 | 2.05347  |
| C  | 2.17912  | -0.96206 | 1.42411  | C | -5.76434 | -3.46105 | 1.00183  |
| C  | -0.78999 | 1.89317  | 2.66488  | H | -6.36691 | -3.58155 | 0.09513  |
| C  | 0.31183  | -1.78831 | 2.50906  | H | -6.42248 | -3.06799 | 1.78433  |
| C  | -2.56813 | -2.07929 | -0.76458 | H | -5.42805 | -4.45113 | 1.32877  |
| C  | -2.16083 | -3.69285 | -2.57700 | C | -4.41973 | -6.76466 | -2.05377 |
| H  | -1.56349 | -3.96252 | -3.44323 | H | -4.18843 | -6.95426 | -1.00028 |
| C  | -3.85964 | -4.13089 | -0.98575 | H | -4.52213 | -7.73581 | -2.54963 |
| H  | -4.65254 | -4.76684 | -0.61628 | H | -5.39239 | -6.26397 | -2.10650 |

|   |          |          |          |   |          |          |          |
|---|----------|----------|----------|---|----------|----------|----------|
| C | -3.64475 | -2.91515 | -0.32942 | C | -0.35813 | 1.73994  | 4.09278  |
| C | -3.11340 | -4.57788 | -2.07987 | H | -0.59142 | 0.75727  | 4.51438  |
| C | 1.48060  | 0.90493  | -3.24846 | H | -0.86221 | 2.48239  | 4.72634  |
| H | 1.62760  | 1.18095  | -2.20594 | H | 0.71800  | 1.90463  | 4.19983  |
| C | 2.27530  | -2.59577 | -0.58676 | C | -3.23402 | 1.09100  | 2.96738  |
| H | 1.53986  | -3.00938 | -1.28224 | H | -4.01925 | 0.65179  | 2.34979  |
| H | 2.96460  | -3.40933 | -0.31991 | H | -3.69151 | 1.90058  | 3.55367  |
| H | 2.85737  | -1.84290 | -1.12529 | H | -2.91710 | 0.32633  | 3.68354  |
| C | 3.45067  | -0.21758 | 1.15954  | C | -2.00528 | -6.75254 | -2.66533 |
| H | 3.44188  | 0.27633  | 0.18485  | H | -1.18375 | -6.23836 | -3.17422 |
| H | 4.31272  | -0.89586 | 1.19395  | H | -2.12776 | -7.73388 | -3.13882 |
| H | 3.60941  | 0.55640  | 1.91589  | H | -1.70422 | -6.91131 | -1.62468 |
| C | -0.56882 | 3.48461  | -0.72494 | C | -3.71234 | -5.75844 | -4.21884 |
| H | -1.03514 | 3.03929  | -1.61087 | H | -4.64264 | -5.18733 | -4.30535 |
| H | 0.50978  | 3.51217  | -0.88929 | H | -3.86207 | -6.72988 | -4.70450 |
| H | -0.93116 | 4.52038  | -0.66645 | H | -2.93904 | -5.22510 | -4.78110 |
| C | -4.59647 | -2.48271 | 0.79805  | C | 5.20601  | 5.12982  | 2.70406  |
| C | -3.31736 | -5.94694 | -2.74075 | C | 5.83729  | 3.97206  | 2.21453  |
| C | -0.23083 | -3.79310 | 0.93819  | C | 5.46802  | 3.42785  | 1.00312  |
| H | -1.25733 | -3.80883 | 1.31095  | C | 4.43744  | 4.02385  | 0.22941  |
| H | 0.28239  | -4.67526 | 1.34559  | C | 3.81233  | 5.18901  | 0.73007  |
| H | -0.28365 | -3.92340 | -0.14590 | C | 4.18920  | 5.73188  | 1.95061  |
| C | -0.62874 | -2.10335 | 3.63537  | H | 6.61855  | 3.51835  | 2.81616  |
| H | -1.28281 | -2.94180 | 3.38993  | H | 5.96076  | 2.53348  | 0.63724  |
| H | -1.27086 | -1.26012 | 3.91177  | H | 3.02245  | 5.65988  | 0.15465  |
| H | -0.06568 | -2.38113 | 4.53529  | H | 3.68273  | 6.62109  | 2.30884  |
| C | -1.04563 | -1.52968 | -4.04879 | C | 4.10679  | 3.51525  | -1.04276 |
| H | -1.71067 | -2.12749 | -4.64909 | F | 4.48734  | 2.30009  | -1.43357 |
| C | -5.20622 | -1.11896 | 0.42405  | F | 3.01160  | 3.91323  | -1.69102 |
| H | -4.42407 | -0.37833 | 0.25764  | F | 1.35689  | 1.12662  | -0.33603 |
| H | -5.86831 | -0.76318 | 1.22299  | O | 5.65062  | 5.57927  | 3.90500  |

|   |          |          |          |   |         |         |         |
|---|----------|----------|----------|---|---------|---------|---------|
| H | -5.80061 | -1.20231 | -0.49253 | C | 5.04684 | 6.73585 | 4.44829 |
| C | -0.11868 | -0.61315 | -4.40378 | H | 3.97385 | 6.58742 | 4.62602 |
| H | 0.20104  | -0.28788 | -5.38078 | H | 5.54516 | 6.91729 | 5.40168 |
| C | 2.76462  | 0.27271  | -3.78451 | H | 5.18617 | 7.60923 | 3.79800 |

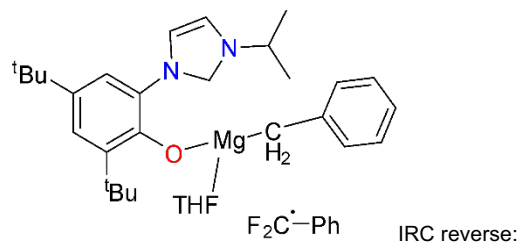

|   |          |          |          |   |          |          |          |
|---|----------|----------|----------|---|----------|----------|----------|
| O | -1.65685 | -0.79675 | -0.03127 | H | -1.40644 | -6.93997 | 0.97468  |
| N | -0.43365 | -2.45590 | -2.01494 | C | -3.46912 | -6.70500 | -1.81400 |
| N | 1.22815  | -1.44804 | -2.93858 | H | -4.36843 | -6.14294 | -2.08702 |
| C | -1.39948 | -2.93954 | -1.06769 | H | -3.69778 | -7.77463 | -1.89257 |
| C | 0.48779  | -1.47014 | -1.80272 | H | -2.69620 | -6.47765 | -2.55540 |
| C | -2.00654 | -2.05858 | -0.12510 | C | 1.11010  | 5.50556  | 5.67108  |
| C | -1.71862 | -4.29547 | -1.12343 | C | 0.09814  | 6.31160  | 5.13707  |
| H | -1.16584 | -4.93037 | -1.81056 | C | -0.01013 | 6.49776  | 3.76929  |
| C | -3.33159 | -3.97731 | 0.58963  | C | 0.91018  | 5.86478  | 2.89335  |
| H | -4.09881 | -4.38044 | 1.23754  | C | 1.93669  | 5.05183  | 3.44140  |
| C | -3.02475 | -2.62093 | 0.70769  | C | 2.02168  | 4.88005  | 4.81305  |
| C | -2.69489 | -4.85048 | -0.30085 | H | 1.18623  | 5.36469  | 6.74491  |
| C | 2.34397  | -0.51387 | -3.15692 | H | -0.61473 | 6.79571  | 5.79878  |
| H | 2.56406  | -0.10328 | -2.16683 | H | -0.79672 | 7.12127  | 3.35745  |
| C | -3.75769 | -1.73621 | 1.73166  | H | 2.64437  | 4.56131  | 2.78160  |
| C | -3.01174 | -6.34973 | -0.38542 | H | 2.80444  | 4.24715  | 5.22125  |
| C | -0.27401 | -3.00916 | -3.27625 | C | 0.84110  | 6.09146  | 1.50870  |
| H | -0.92315 | -3.77927 | -3.65880 | F | 1.54970  | 5.38718  | 0.62978  |
| C | -4.45528 | -0.56386 | 1.01311  | F | -0.20873 | 6.66730  | 0.92895  |

|   |          |          |          |    |          |          |          |
|---|----------|----------|----------|----|----------|----------|----------|
| H | -3.72584 | 0.04247  | 0.47466  | C  | 1.54426  | 0.59698  | 1.28726  |
| H | -4.97497 | 0.07129  | 1.74108  | H  | 1.53653  | -0.19829 | 2.04438  |
| H | -5.19872 | -0.93539 | 0.29875  | H  | 1.24729  | 1.52872  | 1.78406  |
| C | 0.77640  | -2.37539 | -3.85575 | C  | 2.87441  | 0.71624  | 0.65695  |
| H | 1.21967  | -2.50943 | -4.82959 | C  | 3.69859  | -0.41312 | 0.44468  |
| C | 3.58550  | -1.25219 | -3.64840 | C  | 3.37830  | 1.94918  | 0.18385  |
| H | 3.83796  | -2.07760 | -2.97800 | C  | 4.93154  | -0.31638 | -0.19384 |
| H | 4.43205  | -0.56115 | -3.66614 | H  | 3.35814  | -1.38196 | 0.80601  |
| H | 3.45394  | -1.64889 | -4.66126 | C  | 4.60823  | 2.04502  | -0.46295 |
| C | 1.92225  | 0.61760  | -4.09241 | H  | 2.79436  | 2.85235  | 0.35018  |
| H | 1.67386  | 0.23951  | -5.09030 | C  | 5.39992  | 0.91326  | -0.66259 |
| H | 2.73828  | 1.33874  | -4.19632 | H  | 5.53832  | -1.21093 | -0.31915 |
| H | 1.04934  | 1.14022  | -3.69202 | H  | 4.95868  | 3.01834  | -0.80095 |
| C | -2.75388 | -1.18983 | 2.76713  | H  | 6.36556  | 0.98969  | -1.15463 |
| H | -2.27528 | -2.01109 | 3.31199  | Mg | 0.10236  | -0.01720 | -0.20394 |
| H | -3.27002 | -0.55582 | 3.49865  | C  | -0.07590 | 3.04532  | -0.92272 |
| H | -1.97698 | -0.59839 | 2.28084  | O  | -0.51105 | 1.70298  | -1.25860 |
| C | -4.83988 | -2.50632 | 2.50452  | C  | -1.80658 | 1.74660  | -1.90818 |
| H | -5.61174 | -2.91253 | 1.84127  | C  | -2.38741 | 3.09305  | -1.50944 |
| H | -5.33445 | -1.82419 | 3.20465  | C  | -1.13868 | 3.97940  | -1.49414 |
| H | -4.42193 | -3.33062 | 3.09285  | H  | -0.00876 | 3.11128  | 0.16692  |
| C | -4.12649 | -6.76364 | 0.58521  | H  | 0.92070  | 3.19999  | -1.34275 |
| H | -3.84993 | -6.57327 | 1.62756  | H  | -1.65440 | 1.67903  | -2.99327 |
| H | -4.32262 | -7.83683 | 0.48674  | H  | -2.36485 | 0.87584  | -1.55957 |
| H | -5.06351 | -6.23579 | 0.37796  | H  | -3.15450 | 3.43923  | -2.20715 |
| C | -1.75027 | -7.16571 | -0.04003 | H  | -2.83382 | 3.03245  | -0.51096 |
| H | -0.92537 | -6.94699 | -0.72568 | H  | -0.87670 | 4.28235  | -2.51398 |
| H | -1.95639 | -8.24122 | -0.09991 | H  | -1.24672 | 4.88397  | -0.89176 |



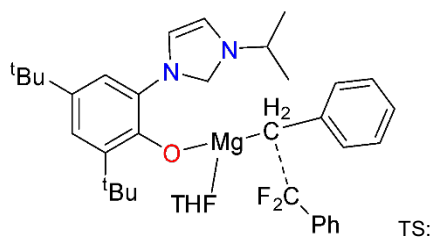

|   |          |          |          |   |         |          |          |
|---|----------|----------|----------|---|---------|----------|----------|
| O | 2.78690  | 7.34007  | 12.49284 | H | 5.35135 | 1.75612  | 11.85853 |
| N | 3.97107  | 6.72992  | 9.96031  | C | 2.87292 | 1.66137  | 9.42205  |
| N | 4.75692  | 8.52619  | 9.07039  | H | 1.79607 | 1.85622  | 9.38138  |
| C | 3.50997  | 5.72677  | 10.87914 | H | 3.04438 | 0.62500  | 9.10772  |
| C | 4.43150  | 7.97761  | 10.26902 | H | 3.35798 | 2.31229  | 8.68731  |
| C | 2.85042  | 6.09055  | 12.08930 | C | 8.17996 | 14.25547 | 15.50821 |
| C | 3.69761  | 4.39510  | 10.50995 | C | 7.92417 | 14.44057 | 14.14583 |
| H | 4.28933  | 4.17956  | 9.62444  | C | 7.96291 | 13.36968 | 13.26372 |
| C | 2.42951  | 3.70982  | 12.39555 | C | 8.26955 | 12.06900 | 13.72844 |
| H | 1.98204  | 2.91891  | 12.98279 | C | 8.52465 | 11.88972 | 15.10815 |
| C | 2.24360  | 5.02457  | 12.82527 | C | 8.48193 | 12.97117 | 15.97573 |
| C | 3.17236  | 3.35040  | 11.26390 | H | 8.14890 | 15.09762 | 16.19352 |
| C | 5.31498  | 9.87697  | 8.91148  | H | 7.70106 | 15.43562 | 13.76745 |
| H | 5.28100  | 10.30764 | 9.91624  | H | 7.77783 | 13.52406 | 12.20508 |
| C | 1.39203  | 5.32732  | 14.07119 | H | 8.75965 | 10.89672 | 15.47710 |
| C | 3.42091  | 1.89546  | 10.84366 | H | 8.69231 | 12.81532 | 17.03116 |
| C | 4.00423  | 6.52456  | 8.58940  | C | 8.18535 | 10.94065 | 12.84948 |
| H | 3.64004  | 5.62118  | 8.12954  | F | 8.87883 | 9.83859  | 13.19112 |
| C | 0.23423  | 6.27116  | 13.68878 | F | 8.36683 | 11.19317 | 11.52555 |
| H | 0.62261  | 7.20681  | 13.28425 | C | 6.13060 | 10.08217 | 12.72131 |
| H | -0.37842 | 6.49530  | 14.57068 | H | 5.69750 | 11.06931 | 12.84169 |
| H | -0.41407 | 5.80710  | 12.93691 | H | 6.44464 | 9.78366  | 11.72611 |
| C | 4.50849  | 7.65307  | 8.03147  | C | 5.97258 | 9.08654  | 13.73887 |
| H | 4.68935  | 7.89783  | 6.99691  | C | 5.48790 | 9.39712  | 15.05377 |
| C | 6.77066  | 9.81230  | 8.45426  | C | 6.33371 | 7.71314  | 13.51558 |
| H | 7.37110  | 9.21529  | 9.14512  | C | 5.38891 | 8.42766  | 16.03768 |

|   |         |          |          |    |          |          |          |
|---|---------|----------|----------|----|----------|----------|----------|
| H | 7.19665 | 10.81877 | 8.42141  | H  | 5.26082  | 10.43394 | 15.29100 |
| H | 6.85462 | 9.37550  | 7.45326  | C  | 6.22024  | 6.75866  | 14.52018 |
| C | 4.44262 | 10.72216 | 7.98546  | H  | 6.76648  | 7.43526  | 12.55596 |
| H | 4.45819 | 10.34538 | 6.95733  | C  | 5.74936  | 7.09484  | 15.79157 |
| H | 4.81596 | 11.75006 | 7.96435  | H  | 5.03709  | 8.71565  | 17.02606 |
| H | 3.40434 | 10.73926 | 8.32899  | H  | 6.51785  | 5.73509  | 14.30581 |
| C | 2.25636 | 5.98013  | 15.16569 | H  | 5.66761  | 6.34475  | 16.57106 |
| H | 3.06087 | 5.30655  | 15.47755 | Mg | 4.13725  | 8.70166  | 12.30270 |
| H | 1.64337 | 6.20511  | 16.04756 | C  | 2.76804  | 11.35614 | 13.38695 |
| H | 2.71135 | 6.90434  | 14.80987 | O  | 2.75687  | 10.26591 | 12.42696 |
| C | 0.76462 | 4.06069  | 14.67459 | C  | 1.41019  | 10.06023 | 11.92423 |
| H | 0.11335 | 3.54097  | 13.96297 | C  | 0.51235  | 10.68152 | 12.97890 |
| H | 0.15088 | 4.34181  | 15.53730 | C  | 1.33908  | 11.89302 | 13.41869 |
| H | 1.52106 | 3.35305  | 15.03119 | H  | 3.07804  | 10.94517 | 14.35280 |
| C | 2.73773 | 0.89418  | 11.78536 | H  | 3.50423  | 12.09665 | 13.06383 |
| H | 3.10867 | 0.98273  | 12.81186 | H  | 1.31868  | 10.57668 | 10.95990 |
| H | 2.94124 | -0.12787 | 11.44811 | H  | 1.28702  | 8.98464  | 11.78799 |
| H | 1.65060 | 1.02635  | 11.80145 | H  | -0.47026 | 10.95152 | 12.58337 |
| C | 4.93531 | 1.60779  | 10.85668 | H  | 0.36963  | 9.98352  | 13.81034 |
| H | 5.47889 | 2.26602  | 10.17132 | H  | 1.22062  | 12.71462 | 12.70394 |
| H | 5.13522 | 0.57309  | 10.55341 | H  | 1.06724  | 12.26700 | 14.40893 |

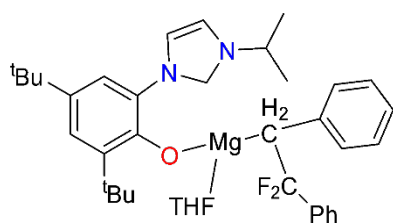

IRC forward:

|   |          |          |          |   |          |          |          |
|---|----------|----------|----------|---|----------|----------|----------|
| O | -2.44437 | -0.94289 | 0.34445  | H | 1.24125  | -5.89364 | -0.39328 |
| N | -0.91466 | -1.14018 | -2.06136 | C | -1.05731 | -6.28218 | -2.97295 |
| N | -0.28765 | 0.80781  | -2.72733 | H | -2.14852 | -6.28937 | -3.06524 |
| C | -1.27120 | -2.27740 | -1.25878 | H | -0.67748 | -7.24426 | -3.33694 |

|   |          |          |          |    |          |          |          |
|---|----------|----------|----------|----|----------|----------|----------|
| C | -0.66002 | 0.12558  | -1.61637 | H  | -0.67141 | -5.50277 | -3.63810 |
| C | -2.07779 | -2.12698 | -0.09386 | C  | 5.23007  | 5.21414  | 3.14196  |
| C | -0.80984 | -3.52298 | -1.68174 | C  | 5.91686  | 5.04749  | 1.94016  |
| H | -0.13117 | -3.56484 | -2.52922 | C  | 5.81269  | 3.84951  | 1.23611  |
| C | -2.01660 | -4.55699 | 0.08281  | C  | 5.02121  | 2.81116  | 1.73156  |
| H | -2.32157 | -5.45345 | 0.60648  | C  | 4.33473  | 2.97815  | 2.93724  |
| C | -2.47704 | -3.33093 | 0.56549  | C  | 4.44015  | 4.17758  | 3.63786  |
| C | -1.16996 | -4.69567 | -1.02390 | H  | 5.31269  | 6.14785  | 3.69198  |
| C | 0.07462  | 2.23203  | -2.71876 | H  | 6.54067  | 5.84852  | 1.55247  |
| H | 0.18337  | 2.48271  | -1.65840 | H  | 6.35530  | 3.71011  | 0.30667  |
| C | -3.39527 | -3.26621 | 1.79884  | H  | 3.72130  | 2.16966  | 3.31992  |
| C | -0.63072 | -6.04767 | -1.51034 | H  | 3.90456  | 4.30095  | 4.57517  |
| C | -0.72281 | -1.22189 | -3.43212 | C  | 4.87170  | 1.52850  | 0.95152  |
| H | -0.90547 | -2.12518 | -3.99008 | F  | 4.86173  | 0.46554  | 1.82138  |
| C | -4.71972 | -2.56766 | 1.43070  | F  | 5.97924  | 1.35426  | 0.14860  |
| H | -4.52996 | -1.55750 | 1.06510  | C  | 3.63599  | 1.43421  | 0.04738  |
| H | -5.37440 | -2.50949 | 2.30903  | H  | 3.72752  | 2.24541  | -0.68454 |
| H | -5.24940 | -3.12853 | 0.65238  | H  | 3.76220  | 0.48990  | -0.50079 |
| C | -0.32344 | 0.00503  | -3.84998 | C  | 2.30815  | 1.49112  | 0.74049  |
| H | -0.07509 | 0.35751  | -4.83833 | C  | 1.53161  | 2.68500  | 0.77437  |
| C | 1.41982  | 2.45481  | -3.40493 | C  | 1.81090  | 0.37841  | 1.48364  |
| H | 2.19143  | 1.81848  | -2.96472 | C  | 0.31543  | 2.75336  | 1.41301  |
| H | 1.72492  | 3.49813  | -3.28364 | H  | 1.93567  | 3.58378  | 0.30847  |
| H | 1.36977  | 2.25052  | -4.47998 | C  | 0.60948  | 0.42324  | 2.14893  |
| C | -1.04289 | 3.07701  | -3.32802 | H  | 2.42319  | -0.51746 | 1.55557  |
| H | -1.20303 | 2.82788  | -4.38263 | C  | -0.29500 | 1.57610  | 2.04203  |
| H | -0.78487 | 4.13887  | -3.26941 | H  | -0.20759 | 3.70738  | 1.45850  |
| H | -1.98102 | 2.92066  | -2.78880 | H  | 0.29935  | -0.43195 | 2.74663  |
| C | -2.69773 | -2.49369 | 2.93656  | H  | -0.94228 | 1.76336  | 2.90457  |
| H | -1.77001 | -2.99572 | 3.23243  | Mg | -1.39167 | 0.67114  | 0.35886  |
| H | -3.34972 | -2.44443 | 3.81749  | C  | -3.32580 | 3.14297  | 0.74271  |

|   |          |          |          |   |          |         |          |
|---|----------|----------|----------|---|----------|---------|----------|
| H | -2.45722 | -1.47677 | 2.62351  | O | -2.98832 | 1.99055 | -0.06977 |
| C | -3.74910 | -4.65993 | 2.34085  | C | -4.18238 | 1.46033 | -0.70256 |
| H | -4.27156 | -5.27210 | 1.59734  | C | -5.32860 | 1.99170 | 0.14054  |
| H | -4.41568 | -4.55084 | 3.20329  | C | -4.81742 | 3.38392 | 0.52200  |
| H | -2.86437 | -5.20966 | 2.68023  | H | -3.09416 | 2.89789 | 1.78436  |
| C | -1.15707 | -7.21930 | -0.66992 | H | -2.69665 | 3.98161 | 0.43194  |
| H | -0.85570 | -7.13501 | 0.37948  | H | -4.22832 | 1.83896 | -1.73181 |
| H | -0.75149 | -8.16124 | -1.05468 | H | -4.07889 | 0.37364 | -0.70853 |
| H | -2.24944 | -7.28967 | -0.70803 | H | -6.27413 | 2.01492 | -0.40748 |
| C | 0.90840  | -6.05103 | -1.42434 | H | -5.46271 | 1.36866 | 1.03119  |
| H | 1.35114  | -5.26096 | -2.03924 | H | -4.97645 | 4.08635 | -0.30354 |
| H | 1.31304  | -7.00920 | -1.77190 | H | -5.30134 | 3.79543 | 1.41150  |

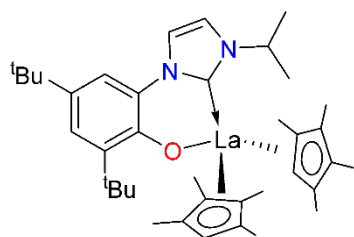

singlet :

|   |         |          |          |   |          |          |          |
|---|---------|----------|----------|---|----------|----------|----------|
| O | 4.02387 | 7.02154  | 12.77356 | H | 6.50640  | 7.42257  | 8.86096  |
| N | 6.23001 | 7.33573  | 11.00612 | C | 1.16537  | 6.43595  | 11.91418 |
| N | 7.48857 | 8.99139  | 11.53261 | H | 1.75725  | 7.27600  | 12.28076 |
| C | 3.34377 | 9.52446  | 15.26572 | H | 0.18429  | 6.45784  | 12.40338 |
| C | 3.99063 | 10.18314 | 14.18879 | H | 1.00877  | 6.56592  | 10.83776 |
| C | 4.23220 | 9.51775  | 16.38532 | C | 7.56627  | 8.86781  | 10.15838 |
| C | 5.36058 | 6.19355  | 10.98940 | H | 8.15730  | 9.52144  | 9.53664  |
| C | 6.66289 | 8.05994  | 12.08469 | C | 9.74506  | 9.69854  | 12.22816 |
| C | 6.29109 | 5.07280  | 15.10067 | H | 9.96525  | 8.67743  | 12.55022 |
| C | 5.27931 | 10.56163 | 14.64285 | H | 10.29239 | 10.39082 | 12.87483 |
| H | 5.99749 | 11.14314 | 14.07410 | H | 10.12410 | 9.82415  | 11.20837 |
| C | 6.73022 | 6.65601  | 16.69544 | C | 1.92871  | 9.02091  | 15.26606 |

|   |         |          |          |   |          |          |          |
|---|---------|----------|----------|---|----------|----------|----------|
| H | 6.66461 | 7.25382  | 17.59899 | H | 1.57859  | 8.80719  | 14.25249 |
| C | 7.48366 | 5.75613  | 14.73101 | H | 1.23983  | 9.75936  | 15.69905 |
| C | 7.75876 | 6.73734  | 15.72527 | H | 1.81044  | 8.10272  | 15.85327 |
| C | 5.43269 | 10.16997 | 15.99852 | C | 7.90977  | 11.40445 | 11.84200 |
| C | 5.81927 | 5.63503  | 16.31971 | H | 8.26837  | 11.59246 | 10.82448 |
| C | 4.20081 | 6.14012  | 11.80968 | H | 8.39188  | 12.13319 | 12.50026 |
| C | 5.66200 | 5.18224  | 10.07782 | H | 6.83132  | 11.58012 | 11.86251 |
| H | 6.60280 | 5.24038  | 9.53692  | C | 2.00160  | 4.89178  | 13.72254 |
| C | 3.59480 | 4.12911  | 10.58367 | H | 2.47253  | 3.92886  | 13.94586 |
| H | 2.88152 | 3.33611  | 10.40200 | H | 1.00934  | 4.89793  | 14.18957 |
| C | 3.25751 | 5.10592  | 11.52418 | H | 2.59754  | 5.68515  | 14.17509 |
| C | 4.79782 | 4.11024  | 9.86788  | C | 0.96889  | 3.97629  | 11.66686 |
| C | 8.24585 | 9.98647  | 12.30069 | H | 0.80439  | 4.05975  | 10.58716 |
| H | 7.90528 | 9.85836  | 13.33264 | H | -0.00952 | 4.04375  | 12.15452 |
| C | 8.38039 | 5.37872  | 13.58743 | H | 1.37009  | 2.97912  | 11.87926 |
| H | 7.81286 | 5.01892  | 12.72345 | C | 4.09524  | 1.91465  | 8.78087  |
| H | 9.07348 | 4.57511  | 13.87421 | H | 3.91624  | 1.42885  | 9.74583  |
| H | 8.98974 | 6.22317  | 13.25048 | H | 4.41321  | 1.14006  | 8.07483  |
| C | 8.98454 | 7.60156  | 15.80878 | H | 3.14423  | 2.31986  | 8.41895  |
| H | 9.25517 | 8.04539  | 14.84339 | C | 6.58170  | 10.53709 | 16.89297 |
| H | 9.85888 | 7.02643  | 16.14229 | H | 6.82852  | 9.74618  | 17.60919 |
| H | 8.84703 | 8.41932  | 16.52282 | H | 6.35842  | 11.43804 | 17.48050 |
| C | 3.40447 | 10.47093 | 12.83582 | H | 7.48688  | 10.75112 | 16.31448 |
| H | 4.14070 | 10.95941 | 12.18987 | C | 3.88268  | 9.05778  | 17.77155 |
| H | 2.53913 | 11.14184 | 12.90786 | H | 3.23571  | 8.17348  | 17.76687 |
| H | 3.07440 | 9.56115  | 12.32223 | H | 3.34219  | 9.83741  | 18.32619 |
| C | 1.87467 | 5.09702  | 12.20160 | H | 4.77363  | 8.81039  | 18.35687 |
| C | 5.17750 | 2.99854  | 8.88043  | C | 6.48649  | 2.32693  | 9.34092  |
| C | 5.72437 | 3.87123  | 14.40018 | H | 7.31303  | 3.04270  | 9.39482  |
| H | 4.72124 | 3.63297  | 14.76380 | H | 6.77923  | 1.53314  | 8.64335  |
| H | 6.34754 | 2.98315  | 14.57311 | H | 6.36777  | 1.88126  | 10.33395 |

|   |         |         |          |    |         |         |          |
|---|---------|---------|----------|----|---------|---------|----------|
| H | 5.65245 | 4.00675 | 13.31564 | C  | 5.38306 | 3.59838 | 7.47536  |
| C | 4.64831 | 5.15931 | 17.13375 | H  | 4.46633 | 4.07868 | 7.11747  |
| H | 4.36835 | 5.89981 | 17.88925 | H  | 5.66091 | 2.81677 | 6.75838  |
| H | 4.88344 | 4.22864 | 17.66697 | H  | 6.17908 | 4.35003 | 7.46778  |
| H | 3.75963 | 4.95383 | 16.52518 | La | 5.40619 | 7.73965 | 14.47758 |
| C | 6.76643 | 7.82836 | 9.82475  |    |         |         |          |

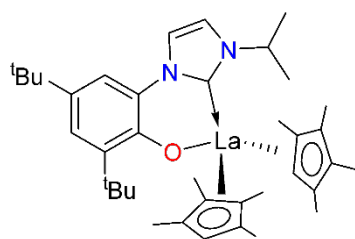

triplet :

|   |         |          |          |   |          |          |          |
|---|---------|----------|----------|---|----------|----------|----------|
| O | 4.02387 | 7.02154  | 12.77356 | H | 6.50640  | 7.42257  | 8.86096  |
| N | 6.23001 | 7.33573  | 11.00612 | C | 1.16537  | 6.43595  | 11.91418 |
| N | 7.48857 | 8.99139  | 11.53261 | H | 1.75725  | 7.27600  | 12.28076 |
| C | 3.34377 | 9.52446  | 15.26572 | H | 0.18429  | 6.45784  | 12.40338 |
| C | 3.99063 | 10.18314 | 14.18879 | H | 1.00877  | 6.56592  | 10.83776 |
| C | 4.23220 | 9.51775  | 16.38532 | C | 7.56627  | 8.86781  | 10.15838 |
| C | 5.36058 | 6.19355  | 10.98940 | H | 8.15730  | 9.52144  | 9.53664  |
| C | 6.66289 | 8.05994  | 12.08469 | C | 9.74506  | 9.69854  | 12.22816 |
| C | 6.29109 | 5.07280  | 15.10067 | H | 9.96525  | 8.67743  | 12.55022 |
| C | 5.27931 | 10.56163 | 14.64285 | H | 10.29239 | 10.39082 | 12.87483 |
| H | 5.99749 | 11.14314 | 14.07410 | H | 10.12410 | 9.82415  | 11.20837 |
| C | 6.73022 | 6.65601  | 16.69544 | C | 1.92871  | 9.02091  | 15.26606 |
| H | 6.66461 | 7.25382  | 17.59899 | H | 1.57859  | 8.80719  | 14.25250 |
| C | 7.48366 | 5.75613  | 14.73101 | H | 1.23983  | 9.75936  | 15.69905 |
| C | 7.75876 | 6.73734  | 15.72527 | H | 1.81044  | 8.10272  | 15.85327 |
| C | 5.43269 | 10.16997 | 15.99852 | C | 7.90977  | 11.40445 | 11.84200 |
| C | 5.81927 | 5.63503  | 16.31971 | H | 8.26837  | 11.59246 | 10.82448 |

|   |         |          |          |    |          |          |          |
|---|---------|----------|----------|----|----------|----------|----------|
| C | 4.20081 | 6.14012  | 11.80968 | H  | 8.39188  | 12.13319 | 12.50026 |
| C | 5.66200 | 5.18224  | 10.07782 | H  | 6.83132  | 11.58012 | 11.86251 |
| H | 6.60280 | 5.24038  | 9.53692  | C  | 2.00160  | 4.89178  | 13.72254 |
| C | 3.59480 | 4.12911  | 10.58367 | H  | 2.47253  | 3.92886  | 13.94586 |
| H | 2.88152 | 3.33611  | 10.40200 | H  | 1.00934  | 4.89793  | 14.18957 |
| C | 3.25751 | 5.10592  | 11.52418 | H  | 2.59754  | 5.68515  | 14.17509 |
| C | 4.79782 | 4.11024  | 9.86788  | C  | 0.96889  | 3.97629  | 11.66686 |
| C | 8.24585 | 9.98647  | 12.30069 | H  | 0.80439  | 4.05975  | 10.58716 |
| H | 7.90528 | 9.85836  | 13.33264 | H  | -0.00952 | 4.04375  | 12.15452 |
| C | 8.38039 | 5.37872  | 13.58743 | H  | 1.37009  | 2.97912  | 11.87926 |
| H | 7.81286 | 5.01892  | 12.72345 | C  | 4.09524  | 1.91465  | 8.78087  |
| H | 9.07348 | 4.57511  | 13.87421 | H  | 3.91624  | 1.42885  | 9.74583  |
| H | 8.98974 | 6.22317  | 13.25048 | H  | 4.41321  | 1.14006  | 8.07483  |
| C | 8.98454 | 7.60156  | 15.80878 | H  | 3.14423  | 2.31986  | 8.41895  |
| H | 9.25517 | 8.04539  | 14.84339 | C  | 6.58170  | 10.53709 | 16.89297 |
| H | 9.85888 | 7.02643  | 16.14229 | H  | 6.82852  | 9.74618  | 17.60919 |
| H | 8.84703 | 8.41932  | 16.52282 | H  | 6.35842  | 11.43804 | 17.48051 |
| C | 3.40447 | 10.47093 | 12.83582 | H  | 7.48688  | 10.75112 | 16.31448 |
| H | 4.14070 | 10.95941 | 12.18987 | C  | 3.88268  | 9.05778  | 17.77156 |
| H | 2.53913 | 11.14184 | 12.90786 | H  | 3.23571  | 8.17348  | 17.76687 |
| H | 3.07440 | 9.56115  | 12.32223 | H  | 3.34219  | 9.83741  | 18.32619 |
| C | 1.87467 | 5.09702  | 12.20160 | H  | 4.77363  | 8.81039  | 18.35687 |
| C | 5.17750 | 2.99854  | 8.88043  | C  | 6.48649  | 2.32693  | 9.34092  |
| C | 5.72437 | 3.87123  | 14.40018 | H  | 7.31303  | 3.04270  | 9.39482  |
| H | 4.72124 | 3.63297  | 14.76380 | H  | 6.77923  | 1.53314  | 8.64335  |
| H | 6.34754 | 2.98315  | 14.57311 | H  | 6.36777  | 1.88126  | 10.33395 |
| H | 5.65245 | 4.00675  | 13.31564 | C  | 5.38306  | 3.59838  | 7.47536  |
| C | 4.64831 | 5.15931  | 17.13375 | H  | 4.46633  | 4.07868  | 7.11747  |
| H | 4.36835 | 5.89981  | 17.88925 | H  | 5.66091  | 2.81677  | 6.75838  |
| H | 4.88344 | 4.22864  | 17.66697 | H  | 6.17908  | 4.35003  | 7.46778  |
| H | 3.75963 | 4.95383  | 16.52518 | La | 5.40619  | 7.73965  | 14.47758 |

C 6.76643 7.82836 9.82475

IRC for the reaction of 1-La with PhCF<sub>3</sub>:

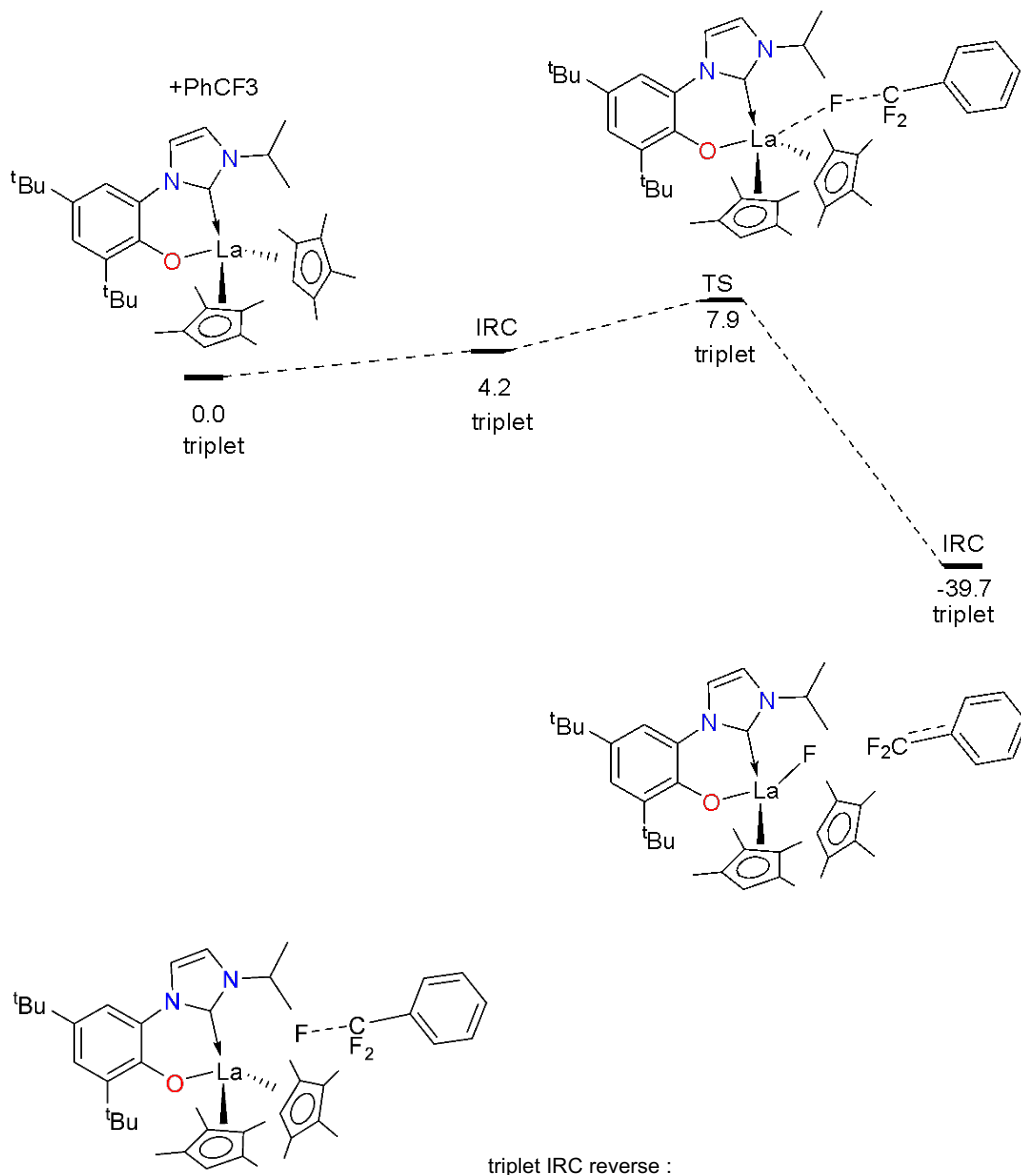

|   |             |             |             |   |             |             |             |
|---|-------------|-------------|-------------|---|-------------|-------------|-------------|
| O | -2.60533500 | -1.01522000 | -0.19359600 | C | 3.12049800  | 0.56871600  | -2.40539300 |
| N | -0.80733800 | -1.44081300 | -2.35742000 | H | 3.29461300  | -0.37505400 | -1.88160100 |
| N | 0.70549600  | 0.07492500  | -2.48832000 | H | 3.85448200  | 1.29989400  | -2.05832900 |
| C | -2.46100900 | 2.04190000  | 1.68222000  | H | 3.28933600  | 0.40198000  | -3.47478900 |
| C | -1.92133400 | 2.37551000  | 0.41341400  | C | -3.91069300 | 1.79037900  | 1.98323600  |
| C | -1.40565300 | 2.09267700  | 2.64426900  | H | -4.45171700 | 1.44346600  | 1.09859500  |



|   |             |             |             |   |             |             |             |
|---|-------------|-------------|-------------|---|-------------|-------------|-------------|
| C | -1.78228600 | -2.40666400 | -1.93746200 | H | -4.41215000 | 2.70385000  | 2.33200900  |
| C | -0.08129500 | -0.57304400 | -1.58577700 | H | -4.05215500 | 1.03797200  | 2.76766000  |
| C | -0.13983800 | -2.78191100 | 2.02089300  | C | 1.43376000  | 2.40242600  | -2.87354500 |
| C | -0.53522700 | 2.61635500  | 0.59678300  | H | 1.57553200  | 2.29655700  | -3.95442600 |
| H | 0.14971200  | 2.96344700  | -0.17003100 | H | 2.12474500  | 3.17222400  | -2.52271000 |
| C | 0.78452700  | -1.01227200 | 3.14095500  | H | 0.41170000  | 2.74597300  | -2.69367900 |
| H | 0.97003900  | -0.25179300 | 3.89297400  | C | -4.61908200 | -2.53614000 | 1.58038400  |
| C | 1.02801700  | -2.37260900 | 1.31769100  | H | -4.24088300 | -3.49673200 | 1.94566100  |
| C | 1.60493300  | -1.27477700 | 2.01683500  | H | -5.48056400 | -2.25625500 | 2.19855200  |
| C | -0.21163700 | 2.46086800  | 1.96980900  | H | -3.84191300 | -1.78252400 | 1.71241100  |
| C | -0.29493000 | -1.93307100 | 3.15221200  | C | -6.16188200 | -3.68652000 | 0.02171100  |
| C | -2.74021800 | -2.09692500 | -0.93372100 | H | -6.53759500 | -3.80937900 | -0.99985700 |
| C | -1.79621500 | -3.62572900 | -2.61442800 | H | -7.00134200 | -3.35657700 | 0.64321400  |
| H | -0.98805400 | -3.83649600 | -3.30982100 | H | -5.84671300 | -4.66747100 | 0.39431100  |
| C | -3.81883600 | -4.19947400 | -1.51123800 | C | -3.97053100 | -6.79773100 | -2.78239100 |
| H | -4.64126600 | -4.88725300 | -1.36509700 | H | -4.00508400 | -7.02751400 | -1.71222200 |
| C | -3.83594700 | -3.00272700 | -0.79041700 | H | -3.90087300 | -7.74819800 | -3.32228400 |
| C | -2.80231600 | -4.56532400 | -2.40193900 | H | -4.91945000 | -6.32824600 | -3.06291200 |
| C | 1.70845100  | 1.08990600  | -2.14222200 | C | 1.10787300  | 2.79357700  | 2.60465000  |
| H | 1.58348500  | 1.25251800  | -1.06764600 | H | 1.37762700  | 2.09920000  | 3.40774300  |
| C | 1.63499000  | -3.10061200 | 0.15339600  | H | 1.09092600  | 3.79788600  | 3.05033400  |
| H | 0.87217000  | -3.50817100 | -0.51738400 | H | 1.91958700  | 2.78312400  | 1.87173800  |
| H | 2.25041700  | -3.94624400 | 0.49203900  | C | -1.57045500 | 1.94466900  | 4.12949100  |
| H | 2.28323500  | -2.45083700 | -0.44242900 | H | -2.33363100 | 1.20318800  | 4.39062600  |
| C | 2.91549800  | -0.60865600 | 1.70624600  | H | -1.88047100 | 2.89064800  | 4.59510300  |
| H | 3.03583700  | -0.38162800 | 0.64038700  | H | -0.63770400 | 1.64117800  | 4.61531100  |
| H | 3.76438700  | -1.24724600 | 1.98583800  | C | -1.48363000 | -6.67354700 | -2.75481700 |
| H | 3.02500800  | 0.33063800  | 2.25622700  | H | -0.58379800 | -6.11029300 | -3.02191400 |
| C | -2.68543400 | 2.50527100  | -0.87322000 | H | -1.43852200 | -7.63873500 | -3.27323700 |
| H | -3.30575000 | 1.62596100  | -1.07831800 | H | -1.44918100 | -6.86336800 | -1.67703300 |
| H | -2.00477300 | 2.62622000  | -1.72167300 | C | -2.78348100 | -5.67627500 | -4.66014200 |

|   |             |             |             |    |             |             |             |
|---|-------------|-------------|-------------|----|-------------|-------------|-------------|
| H | -3.34939100 | 3.37950900  | -0.86119600 | H  | -3.68739600 | -5.13751300 | -4.96318300 |
| C | -5.03736700 | -2.64189000 | 0.10188500  | H  | -2.75928200 | -6.63134400 | -5.19815600 |
| C | -2.76821800 | -5.91201700 | -3.13700700 | H  | -1.91887300 | -5.09102800 | -4.98950800 |
| C | -0.96408000 | -3.99646500 | 1.70501000  | C  | 6.93220300  | 6.75630500  | 1.81712000  |
| H | -1.91123300 | -3.99040100 | 2.25095100  | C  | 7.44102100  | 5.69934400  | 1.06142800  |
| H | -0.43567500 | -4.91683200 | 1.98987500  | C  | 6.57549600  | 4.85405300  | 0.37486000  |
| H | -1.20365500 | -4.07988300 | 0.63969100  | C  | 5.19700100  | 5.06963700  | 0.44578200  |
| C | -1.32509000 | -2.06636900 | 4.23917800  | C  | 4.68428800  | 6.12401100  | 1.20044800  |
| H | -2.33790100 | -2.23065000 | 3.85251600  | C  | 5.55661400  | 6.96771300  | 1.88526900  |
| H | -1.35186900 | -1.17094900 | 4.86782900  | H  | 7.60981700  | 7.41591800  | 2.35173100  |
| H | -1.10157400 | -2.91553100 | 4.89858500  | H  | 8.51304300  | 5.53501600  | 1.00556900  |
| C | -0.47974100 | -1.31073000 | -3.69974500 | H  | 6.96581300  | 4.03357400  | -0.21940500 |
| H | -0.97907700 | -1.87330400 | -4.47131600 | H  | 3.61254500  | 6.28404400  | 1.24688300  |
| C | -5.62608600 | -1.29736300 | -0.37138300 | H  | 5.15933100  | 7.79120200  | 2.47122400  |
| H | -4.87292600 | -0.50896400 | -0.33221300 | C  | 4.27710100  | 4.12583000  | -0.27204200 |
| H | -6.47171700 | -1.00723800 | 0.26382700  | F  | 4.69738700  | 3.87797900  | -1.53333600 |
| H | -5.98986300 | -1.37836700 | -1.40159800 | F  | 3.01848500  | 4.59629500  | -0.35829300 |
| C | 0.48003200  | -0.36001700 | -3.78011700 | F  | 4.20744000  | 2.92365400  | 0.34378800  |
| H | 0.99611900  | 0.04035300  | -4.63821300 | La | -0.81529800 | -0.17273100 | 1.00020000  |

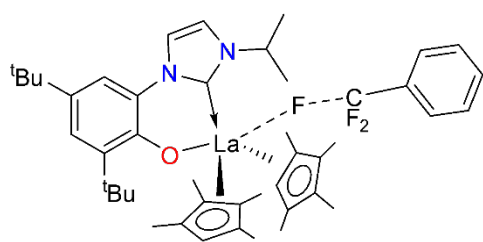

triplet TS :

|   |            |             |             |   |            |             |             |
|---|------------|-------------|-------------|---|------------|-------------|-------------|
| O | 3.20284700 | 7.18628300  | 12.63508600 | C | 8.09607400 | 8.35833100  | 8.80820800  |
| N | 4.29444300 | 6.57227600  | 10.07686800 | H | 8.36980700 | 7.45774800  | 9.36433200  |
| N | 5.73792100 | 8.00983800  | 9.41843500  | H | 8.92922900 | 9.06551700  | 8.87080300  |
| C | 3.22007700 | 10.40998300 | 13.55227200 | H | 7.96925500 | 8.08540400  | 7.75427100  |
| C | 4.44982100 | 11.01191400 | 13.20046400 | C | 1.98674200 | 10.38282800 | 12.69505900 |
| C | 3.33466900 | 9.93413600  | 14.88926400 | H | 2.03750000 | 9.61796500  | 11.91153100 |

|   |            |             |             |   |             |             |             |
|---|------------|-------------|-------------|---|-------------|-------------|-------------|
| C | 3.46838800 | 5.67062100  | 10.81909700 | H | 1.82134100  | 11.35030600 | 12.20673900 |
| C | 5.21313300 | 7.46696200  | 10.55609400 | H | 1.09551900  | 10.16960900 | 13.29130500 |
| C | 5.95532700 | 5.46940900  | 14.12217200 | C | 6.41199400  | 10.24241700 | 8.62016000  |
| C | 5.32880400 | 10.89208800 | 14.32434200 | H | 6.24378300  | 10.03452900 | 7.55736900  |
| H | 6.35793700 | 11.22337100 | 14.35606900 | H | 7.20052300  | 10.99805100 | 8.68345900  |
| C | 7.06825800 | 7.14822200  | 15.21671100 | H | 5.49535300  | 10.66975900 | 9.03500100  |
| H | 7.37603600 | 7.85966800  | 15.97614500 | C | 1.57650800  | 5.84787100  | 14.93577900 |
| C | 7.06249900 | 5.84987000  | 13.32344100 | H | 1.97583700  | 4.88609400  | 15.27683800 |
| C | 7.77513200 | 6.86674500  | 14.01661700 | H | 0.90500900  | 6.22658600  | 15.71626000 |
| C | 4.65182200 | 10.24154900 | 15.36446700 | H | 2.40157000  | 6.54968000  | 14.81399900 |
| C | 5.95969900 | 6.28076200  | 15.30546100 | C | -0.32213800 | 4.68395700  | 13.85492100 |
| C | 2.83305700 | 6.08416100  | 12.02501500 | H | -0.92371200 | 4.51456600  | 12.95536900 |
| C | 3.26187300 | 4.41036500  | 10.25990400 | H | -0.98777400 | 5.08969200  | 14.62494300 |
| H | 3.85553700 | 4.13192400  | 9.39276000  | H | 0.03976300  | 3.71515600  | 14.21676300 |
| C | 1.58935400 | 3.98526800  | 11.88026800 | C | 1.09347400  | 1.29714300  | 10.91378200 |
| H | 0.81598000 | 3.34210300  | 12.27927500 | H | 1.34331100  | 1.15207000  | 11.97013300 |
| C | 1.77661700 | 5.22897700  | 12.48927200 | H | 1.01202000  | 0.30647400  | 10.45334000 |
| C | 2.33790200 | 3.51698900  | 10.79514200 | H | 0.10677200  | 1.76919800  | 10.85749900 |
| C | 6.83046900 | 8.98980900  | 9.38889500  | C | 5.14685000  | 10.06243000 | 16.76903800 |
| H | 7.00489000 | 9.23799400  | 10.43903500 | H | 4.87775900  | 9.08959900  | 17.19312900 |
| C | 7.51706400 | 5.17309200  | 12.06369200 | H | 4.72443200  | 10.82368700 | 17.44003700 |
| H | 6.67301200 | 4.82884200  | 11.45905300 | H | 6.23606400  | 10.15746700 | 16.81897900 |
| H | 8.14158700 | 4.29440000  | 12.27983700 | C | 2.23085200  | 9.37890100  | 15.73266000 |
| H | 8.11251700 | 5.84685600  | 11.44004800 | H | 1.47851700  | 8.85895000  | 15.13602700 |
| C | 9.07380300 | 7.46993300  | 13.59575800 | H | 1.71525000  | 10.17841500 | 16.28574700 |
| H | 8.95245400 | 8.08475500  | 12.69701400 | H | 2.60377800  | 8.67228500  | 16.48158100 |
| H | 9.82575800 | 6.69978300  | 13.38262700 | C | 3.49718300  | 1.35264000  | 10.26705900 |
| H | 9.47328000 | 8.10838000  | 14.38999200 | H | 4.29748900  | 1.87385600  | 9.73219200  |
| C | 4.74533300 | 11.74142100 | 11.92816500 | H | 3.39711300  | 0.35325600  | 9.82610000  |
| H | 4.00979500 | 11.51138900 | 11.15118300 | H | 3.81521600  | 1.23618000  | 11.30833400 |
| H | 5.73508300 | 11.47570800 | 11.54532500 | C | 1.74346800  | 2.24520900  | 8.70599300  |

|   |             |             |             |    |             |             |             |
|---|-------------|-------------|-------------|----|-------------|-------------|-------------|
| H | 4.72805900  | 12.83217700 | 12.06921600 | H  | 0.79468200  | 2.78428500  | 8.61417100  |
| C | 0.82137400  | 5.68024400  | 13.60755800 | H  | 1.61804900  | 1.25356700  | 8.25468400  |
| C | 2.16349800  | 2.12117400  | 10.18417100 | H  | 2.49196000  | 2.78400000  | 8.11597400  |
| C | 5.07000600  | 4.28617000  | 13.88760600 | C  | 9.29901100  | 13.04609600 | 15.93877200 |
| H | 4.08188200  | 4.41720900  | 14.33431800 | C  | 10.04899900 | 11.90329700 | 15.62403000 |
| H | 5.50884300  | 3.37905900  | 14.32918300 | C  | 9.89963600  | 11.28351500 | 14.39997700 |
| H | 4.91959100  | 4.08686100  | 12.82308900 | C  | 8.97397100  | 11.81110800 | 13.45602400 |
| C | 5.07964600  | 6.09229100  | 16.50431400 | C  | 8.21325500  | 12.96943800 | 13.78256700 |
| H | 4.01135500  | 6.12395700  | 16.26759500 | C  | 8.38767200  | 13.57132300 | 15.01445500 |
| H | 5.28050800  | 6.85533300  | 17.26178700 | H  | 9.42445800  | 13.52482300 | 16.90507200 |
| H | 5.26404200  | 5.11638600  | 16.97423200 | H  | 10.75219000 | 11.50120100 | 16.34678100 |
| C | 4.24449800  | 6.58513800  | 8.68976400  | H  | 10.47370700 | 10.39890600 | 14.14950400 |
| H | 3.54270800  | 5.98682100  | 8.13256300  | H  | 7.50310700  | 13.36631300 | 13.06621700 |
| C | 0.17950700  | 7.01888600  | 13.19677900 | H  | 7.80579700  | 14.45215200 | 15.26678700 |
| H | 0.94658600  | 7.76902900  | 13.00406900 | C  | 8.82906700  | 11.20604800 | 12.21223300 |
| H | -0.48497800 | 7.38477000  | 13.98963800 | F  | 9.56184200  | 10.21630800 | 11.81195600 |
| H | -0.41870800 | 6.89509100  | 12.28716800 | F  | 8.08445900  | 11.69567800 | 11.26881300 |
| C | 5.16290100  | 7.48761800  | 8.27594800  | F  | 7.04917800  | 9.39259000  | 12.39246800 |
| H | 5.43291200  | 7.80226300  | 7.28029800  | La | 5.27783100  | 8.22434600  | 13.23497200 |

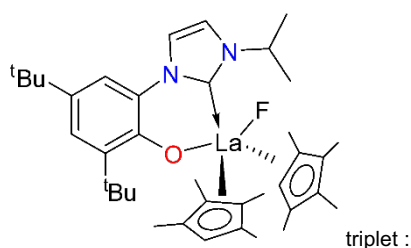

|   |             |             |             |   |             |             |             |
|---|-------------|-------------|-------------|---|-------------|-------------|-------------|
| O | -1.73559400 | -0.68334200 | -0.44455500 | C | 3.45740200  | -0.18439700 | -3.98172700 |
| N | -0.54948400 | -1.80022500 | -2.75808700 | H | 3.74245900  | -1.11462300 | -3.48375400 |
| N | 1.09211500  | -0.56360200 | -3.37525100 | H | 4.28483700  | 0.52417800  | -3.88209100 |
| C | -2.56539600 | 2.94663900  | 1.75023800  | H | 3.32467200  | -0.39133500 | -5.04960500 |
| C | -1.26432200 | 2.94974300  | 1.06664800  | C | -3.83344100 | 3.39846800  | 1.10424700  |

|   |             |             |             |   |             |             |             |
|---|-------------|-------------|-------------|---|-------------|-------------|-------------|
| C | -2.36995700 | 2.48104700  | 3.02552900  | H | -4.10771000 | 2.75626100  | 0.25839900  |
| C | -1.56789700 | -2.47251800 | -2.01037900 | H | -3.74037400 | 4.41858900  | 0.71071900  |
| C | 0.44197600  | -1.00048500 | -2.26366600 | H | -4.67150900 | 3.39126600  | 1.80553200  |
| C | 1.64964000  | -2.68390700 | 0.84986500  | C | 1.76655200  | 1.70731300  | -4.04386400 |
| C | -0.29553200 | 2.45397400  | 1.95842100  | H | 1.58570100  | 1.56352100  | -5.11504300 |
| H | 0.77560900  | 2.47111300  | 1.78784300  | H | 2.55003800  | 2.46059700  | -3.93017500 |
| C | 1.56352100  | -1.23025400 | 2.61312700  | H | 0.85485800  | 2.09853600  | -3.58563200 |
| H | 1.27339300  | -0.76528900 | 3.55067500  | C | -3.54116700 | -1.42905000 | 1.92481100  |
| C | 2.73049700  | -1.75555500 | 0.72195800  | H | -3.20883500 | -2.36451000 | 2.38588000  |
| C | 2.68436800  | -0.86564400 | 1.82408900  | H | -4.20981800 | -0.92334200 | 2.63197300  |
| C | -0.94225600 | 2.18677400  | 3.18104800  | H | -2.67247900 | -0.79011300 | 1.76169900  |
| C | 0.93255100  | -2.36182000 | 2.03025200  | C | -5.54934500 | -2.50082500 | 0.95456400  |
| C | -2.21160000 | -1.81726900 | -0.92330900 | H | -6.15823200 | -2.71938000 | 0.07082200  |
| C | -1.95389200 | -3.73873600 | -2.44312300 | H | -6.16634700 | -1.91102200 | 1.64106700  |
| H | -1.37343200 | -4.20947800 | -3.23265900 | H | -5.31618300 | -3.44673500 | 1.45610900  |
| C | -3.74324500 | -3.70735200 | -0.88195400 | C | -4.64921500 | -6.35944400 | -1.61597800 |
| H | -4.61934100 | -4.17897200 | -0.45629300 | H | -4.48756200 | -6.42706000 | -0.53496600 |
| C | -3.38720900 | -2.44204000 | -0.40568300 | H | -4.87553900 | -7.36763000 | -1.97932800 |
| C | -3.03884000 | -4.40146700 | -1.87288200 | H | -5.53420400 | -5.73868200 | -1.79206100 |
| C | 2.19660600  | 0.41018900  | -3.36020100 | C | -0.30663000 | 1.75750100  | 4.45622100  |
| H | 2.36686300  | 0.63229900  | -2.30466300 | H | -0.72583700 | 0.80950200  | 4.81825800  |
| C | 3.80926900  | -1.79405200 | -0.32097700 | H | -0.48900800 | 2.49428700  | 5.24985500  |
| H | 3.44968100  | -2.22374300 | -1.26127800 | H | 0.77343300  | 1.63579300  | 4.34869300  |
| H | 4.66191700  | -2.40646800 | 0.00432500  | C | -3.37602800 | 2.28526500  | 4.11253100  |
| H | 4.19959400  | -0.79401800 | -0.53834800 | H | -4.37463100 | 2.60200600  | 3.80184200  |
| C | 3.65915200  | 0.24092600  | 2.10684100  | H | -3.11531400 | 2.85475800  | 5.01377600  |
| H | 3.80806900  | 0.89039900  | 1.23693600  | H | -3.44571900 | 1.23229700  | 4.41379500  |
| H | 4.64372100  | -0.15144500 | 2.39346300  | C | -2.23684900 | -6.77226700 | -2.07584000 |
| H | 3.31331000  | 0.87230800  | 2.93174300  | H | -1.32775400 | -6.45270200 | -2.59485400 |
| C | -1.02936300 | 3.46979900  | -0.30837300 | H | -2.47847500 | -7.78564500 | -2.41834300 |
| H | -1.73642600 | 3.03353300  | -1.02576000 | H | -2.00886500 | -6.81986800 | -1.00588700 |

|   |             |             |             |    |             |             |             |
|---|-------------|-------------|-------------|----|-------------|-------------|-------------|
| H | -0.01171300 | 3.25797700  | -0.64190000 | C  | -3.71875000 | -5.79531700 | -3.85480500 |
| H | -1.19287800 | 4.55628700  | -0.34251600 | H  | -4.55488700 | -5.12394200 | -4.07687300 |
| C | -4.28380800 | -1.70267800 | 0.60376800  | H  | -3.98439300 | -6.79938100 | -4.20632700 |
| C | -3.41339200 | -5.81296500 | -2.34392300 | H  | -2.85667600 | -5.45925000 | -4.43994900 |
| C | 1.41097500  | -3.88242900 | -0.02246200 | C  | 4.42177700  | 5.94547500  | 2.71831800  |
| H | 0.35405900  | -4.16434600 | -0.05417000 | C  | 5.17590900  | 4.80963600  | 2.39491900  |
| H | 1.96705900  | -4.75732100 | 0.34244600  | C  | 4.89552000  | 4.06899700  | 1.26101800  |
| H | 1.73026300  | -3.70698500 | -1.05447000 | C  | 3.82623000  | 4.45611600  | 0.40255100  |
| C | -0.20696700 | -3.14217800 | 2.62040800  | C  | 3.06568500  | 5.61351700  | 0.73824700  |
| H | -0.91847900 | -3.48573100 | 1.86135100  | C  | 3.36919000  | 6.33429300  | 1.87885700  |
| H | -0.76530600 | -2.54419000 | 3.34804600  | H  | 4.65100300  | 6.51935300  | 3.61092700  |
| H | 0.15214000  | -4.03632300 | 3.14801900  | H  | 5.99482100  | 4.50279300  | 3.04006100  |
| C | -0.50699100 | -1.85308000 | -4.14378200 | H  | 5.48492800  | 3.19233800  | 1.01498300  |
| H | -1.22962800 | -2.40487700 | -4.72271500 | H  | 2.24969500  | 5.91968200  | 0.09246800  |
| C | -4.73707600 | -0.36779500 | -0.02188800 | H  | 2.78035300  | 7.21450300  | 2.12292700  |
| H | -3.87422500 | 0.24847800  | -0.28159100 | C  | 3.52981400  | 3.71972900  | -0.73953600 |
| H | -5.36737100 | 0.18700100  | 0.68360500  | F  | 4.21329000  | 2.65769000  | -1.13017000 |
| H | -5.32358100 | -0.54746900 | -0.92964100 | F  | 2.59426900  | 4.05981100  | -1.61020400 |
| C | 0.53156200  | -1.07379200 | -4.53079500 | F  | 1.57867100  | 1.50784800  | -0.43076100 |
| H | 0.89677500  | -0.83798800 | -5.51790600 | La | 0.40846600  | -0.16757100 | 0.28641000  |

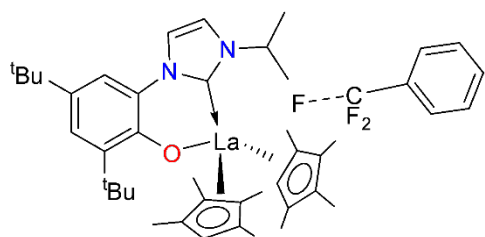

singlet IRC reverse :

|   |             |             |             |   |             |             |             |
|---|-------------|-------------|-------------|---|-------------|-------------|-------------|
| O | -2.34936300 | -0.84439500 | -0.34985400 | C | 3.30047700  | 0.34272800  | -2.85548400 |
| N | -0.73715100 | -1.55903600 | -2.55714800 | H | 3.51830200  | -0.58240100 | -2.31558800 |
| N | 0.87974600  | -0.16969200 | -2.79837300 | H | 4.03877800  | 1.09576000  | -2.56485800 |
| C | -2.09937000 | 2.17810700  | 1.56237400  | H | 3.42395500  | 0.14737900  | -3.92701800 |
| C | -0.90072400 | 2.75335100  | 0.94689600  | C | -3.45476800 | 2.22379600  | 0.93510800  |

|   |             |             |             |   |             |             |             |
|---|-------------|-------------|-------------|---|-------------|-------------|-------------|
| C | -1.75886600 | 1.71106600  | 2.83218900  | H | -3.43493700 | 1.87422900  | -0.10245800 |
| C | -1.75852800 | -2.41369200 | -2.04072300 | H | -3.84698800 | 3.25009900  | 0.92432000  |
| C | 0.08831400  | -0.73369100 | -1.83676300 | H | -4.17165200 | 1.60260000  | 1.47558400  |
| C | 0.55048600  | -2.59248800 | 1.75266900  | C | 1.57655800  | 2.14137500  | -3.29033700 |
| C | 0.15430500  | 2.61984900  | 1.84862700  | H | 1.66334400  | 2.00893000  | -4.37451700 |
| H | 1.16277100  | 2.98415000  | 1.70214500  | H | 2.27469400  | 2.92879800  | -2.99597500 |
| C | 1.40194000  | -0.77234400 | 2.83260800  | H | 0.56134600  | 2.48054200  | -3.06726400 |
| H | 1.61606000  | -0.05582100 | 3.61393400  | C | -4.19133300 | -2.15737400 | 1.72089100  |
| C | 1.66907600  | -2.08783600 | 0.98939200  | H | -3.80512300 | -3.11510300 | 2.08800000  |
| C | 2.18975800  | -0.95378200 | 1.65262100  | H | -4.95511200 | -1.81190600 | 2.42924700  |
| C | -0.35277100 | 2.02080000  | 3.03968100  | H | -3.37122200 | -1.43626700 | 1.70976800  |
| C | 0.39604500  | -1.78432600 | 2.89734600  | C | -5.97040000 | -3.31476500 | 0.44546600  |
| C | -2.60756900 | -1.96388900 | -0.98892300 | H | -6.48348200 | -3.47532500 | -0.50906400 |
| C | -1.92641100 | -3.65471300 | -2.65207200 | H | -6.70625900 | -2.91054000 | 1.14943600  |
| H | -1.19919400 | -3.96033000 | -3.40038700 | H | -5.64901800 | -4.28804700 | 0.83286400  |
| C | -3.87339200 | -4.01799000 | -1.34400200 | C | -4.36317800 | -6.63103100 | -2.49922300 |
| H | -4.72219100 | -4.63710100 | -1.08402400 | H | -4.32849400 | -6.82113500 | -1.42129800 |
| C | -3.73547000 | -2.79286000 | -0.68712100 | H | -4.42177300 | -7.60158000 | -3.00380200 |
| C | -2.98116500 | -4.49811000 | -2.31026500 | H | -5.28718300 | -6.08642900 | -2.72111100 |
| C | 1.89841500  | 0.85287700  | -2.53463500 | C | 0.32887000  | 2.03177400  | 4.36703800  |
| H | 1.81390700  | 1.04215700  | -1.45313500 | H | 0.11568500  | 1.13825000  | 4.96182800  |
| C | 2.26577000  | -2.79115600 | -0.18936900 | H | -0.01985900 | 2.89138200  | 4.95799000  |
| H | 1.50110900  | -3.19775700 | -0.85742100 | H | 1.41274700  | 2.13022700  | 4.26318400  |
| H | 2.89482900  | -3.63202200 | 0.13667100  | C | -2.69203600 | 1.21512300  | 3.89416100  |
| H | 2.89991600  | -2.12408800 | -0.77852400 | H | -3.60137800 | 0.78986600  | 3.46220300  |
| C | 3.47192900  | -0.23506000 | 1.34884300  | H | -2.99923900 | 2.02650800  | 4.57079800  |
| H | 3.69979100  | -0.23762000 | 0.27905700  | H | -2.23483700 | 0.43799800  | 4.51287800  |
| H | 4.32624200  | -0.70176000 | 1.86375700  | C | -1.88075200 | -6.72804300 | -2.66814600 |
| H | 3.43228500  | 0.81017700  | 1.66705500  | H | -0.95985100 | -6.25230900 | -3.02035700 |
| C | -0.86832200 | 3.44118400  | -0.37759700 | H | -1.95524400 | -7.70972500 | -3.15164600 |
| H | -1.26417100 | 2.81267800  | -1.18519800 | H | -1.78110900 | -6.88598300 | -1.58914500 |

|   |             |             |             |    |             |             |             |
|---|-------------|-------------|-------------|----|-------------|-------------|-------------|
| H | 0.14946300  | 3.73656500  | -0.64088400 | C  | -3.23792700 | -5.69178000 | -4.51063700 |
| H | -1.49328900 | 4.34540600  | -0.35903100 | H  | -4.11399200 | -5.08696800 | -4.76736500 |
| C | -4.80237700 | -2.32439000 | 0.31688700  | H  | -3.33664800 | -6.66472300 | -5.00696200 |
| C | -3.12164300 | -5.86940800 | -2.98376600 | H  | -2.35621500 | -5.19603700 | -4.92945000 |
| C | -0.23060200 | -3.82648900 | 1.41986500  | C  | 6.20068300  | 6.58909100  | 2.18270700  |
| H | -1.16443800 | -3.87138600 | 1.98648600  | C  | 6.68693000  | 5.38019500  | 1.68298500  |
| H | 0.34087700  | -4.73501000 | 1.65701900  | C  | 5.91661000  | 4.62960200  | 0.80075800  |
| H | -0.49070500 | -3.88144800 | 0.35689800  | C  | 4.65491600  | 5.09209500  | 0.41715100  |
| C | -0.51518000 | -2.04729000 | 4.06016200  | C  | 4.16495700  | 6.29998600  | 0.91519900  |
| H | -1.52553600 | -2.32879400 | 3.74628600  | C  | 4.94183600  | 7.04741100  | 1.79725200  |
| H | -0.60303100 | -1.16452100 | 4.69991500  | H  | 6.80462500  | 7.17411300  | 2.87044900  |
| H | -0.13029300 | -2.86072300 | 4.69138900  | H  | 7.66886900  | 5.02303700  | 1.97911400  |
| C | -0.46660100 | -1.49038800 | -3.91619400 | H  | 6.29294400  | 3.69184500  | 0.40404900  |
| H | -1.04099100 | -2.03411300 | -4.64844500 | H  | 3.18645300  | 6.65400400  | 0.60849900  |
| C | -5.39030100 | -0.98378400 | -0.16603600 | H  | 4.56299400  | 7.98979300  | 2.18182700  |
| H | -4.60156500 | -0.24132300 | -0.29001400 | C  | 3.81515100  | 4.24860500  | -0.49557400 |
| H | -6.12467600 | -0.60507600 | 0.55604500  | F  | 4.54569200  | 3.70525100  | -1.49302200 |
| H | -5.90010500 | -1.11304900 | -1.12726900 | F  | 2.81498100  | 4.94761100  | -1.06825300 |
| C | 0.55804100  | -0.61772200 | -4.06506800 | F  | 3.24052300  | 3.21403500  | 0.16130900  |
| H | 1.06003200  | -0.27857100 | -4.95754900 | La | -0.40259200 | -0.10850400 | 0.75299200  |

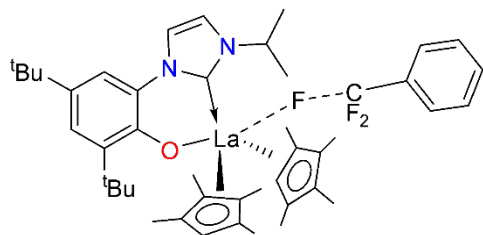

singlet TS :

|   |            |            |             |   |            |            |            |
|---|------------|------------|-------------|---|------------|------------|------------|
| O | 3.00640700 | 7.09207400 | 12.39273800 | C | 8.30958800 | 8.19277700 | 9.08451300 |
| N | 4.36590600 | 6.36382000 | 10.01939600 | H | 8.56738100 | 7.26502400 | 9.60260600 |
| N | 5.91888700 | 7.75486300 | 9.51414700  | H | 9.10691000 | 8.91824000 | 9.26310800 |



|   |            |             |             |   |             |             |             |
|---|------------|-------------|-------------|---|-------------|-------------|-------------|
| C | 2.97490500 | 10.19459600 | 14.09263700 | H | 8.27405100  | 7.98570800  | 8.00889900  |
| C | 4.17238200 | 10.82158000 | 13.49427700 | C | 1.63296900  | 10.20753600 | 13.44029600 |
| C | 3.31094300 | 9.75721400  | 15.36137300 | H | 1.67248800  | 9.82343200  | 12.41583900 |
| C | 3.43789800 | 5.50000900  | 10.67968200 | H | 1.24102100  | 11.23211800 | 13.38492000 |
| C | 5.24351400 | 7.25313500  | 10.58702800 | H | 0.90804900  | 9.60497100  | 13.98986100 |
| C | 5.76195800 | 5.42950100  | 14.14762400 | C | 6.58566500  | 10.03977000 | 8.86872600  |
| C | 5.21367300 | 10.73979700 | 14.42083500 | H | 6.52041600  | 9.88914300  | 7.78533100  |
| H | 6.21369900 | 11.13316700 | 14.30024600 | H | 7.32773700  | 10.81790800 | 9.06039600  |
| C | 6.74084100 | 7.20768100  | 15.20693200 | H | 5.61668600  | 10.40187400 | 9.22392000  |
| H | 6.98708200 | 7.94919900  | 15.95880700 | C | 1.22865500  | 5.90651000  | 14.60379200 |
| C | 6.88145800 | 5.86219200  | 13.36610200 | H | 1.65867300  | 4.98861800  | 15.01977000 |
| C | 7.49298300 | 6.96161200  | 14.02902900 | H | 0.48101200  | 6.27483000  | 15.31711500 |
| C | 4.70707000 | 10.13153700 | 15.59583400 | H | 2.02020300  | 6.65115000  | 14.51104300 |
| C | 5.67922800 | 6.26117100  | 15.29272600 | C | -0.56175000 | 4.61646400  | 13.48729900 |
| C | 2.68794100 | 5.95421400  | 11.79706000 | H | -1.11356200 | 4.38188600  | 12.57094000 |
| C | 3.25829300 | 4.22836400  | 10.13698400 | H | -1.27574900 | 5.04625500  | 14.19838500 |
| H | 3.92325900 | 3.91340700  | 9.33731400  | H | -0.19500600 | 3.67920400  | 13.92009300 |
| C | 1.44660800 | 3.86827900  | 11.62454700 | C | 0.99092900  | 1.16679100  | 10.68754300 |
| H | 0.63917000 | 3.24152300  | 11.97922700 | H | 1.16091600  | 1.04122000  | 11.76215200 |
| C | 1.60025200 | 5.12632700  | 12.21402400 | H | 0.92932900  | 0.16750300  | 10.24362600 |
| C | 2.27315700 | 3.36685900  | 10.61298200 | H | 0.01747400  | 1.64910200  | 10.54852500 |
| C | 6.98777900 | 8.75884800  | 9.59700900  | C | 5.39823100  | 10.08167300 | 16.91228200 |
| H | 7.08133200 | 8.98016500  | 10.66239700 | H | 5.24875500  | 9.12811600  | 17.42856700 |
| C | 7.43218400 | 5.14031600  | 12.17315400 | H | 4.99095700  | 10.85969000 | 17.57422700 |
| H | 6.64302800 | 4.71142300  | 11.54915100 | H | 6.46945200  | 10.26814900 | 16.80883100 |
| H | 8.08592500 | 4.31386600  | 12.48572300 | C | 2.40734400  | 9.19191200  | 16.41047700 |
| H | 8.03175000 | 5.80296600  | 11.54306000 | H | 1.44888500  | 8.88022100  | 15.99047800 |
| C | 8.79861100 | 7.60844700  | 13.67322200 | H | 2.19876000  | 9.93607300  | 17.19108500 |
| H | 8.91489200 | 7.76637700  | 12.59719300 | H | 2.84712800  | 8.32218700  | 16.90861100 |
| H | 9.64214300 | 6.98567600  | 14.00273300 | C | 3.43593300  | 1.17579400  | 10.21572400 |
| H | 8.90387400 | 8.58293000  | 14.15657100 | H | 4.28045000  | 1.66802000  | 9.72303200  |

|   |             |             |             |    |             |             |             |
|---|-------------|-------------|-------------|----|-------------|-------------|-------------|
| C | 4.20029600  | 11.48973200 | 12.16208200 | H  | 3.34862200  | 0.16688800  | 9.79535900  |
| H | 3.74075800  | 10.86962900 | 11.38146600 | H  | 3.68008600  | 1.08198600  | 11.27893000 |
| H | 5.22016800  | 11.73284200 | 11.86195800 | C  | 1.81323500  | 2.06084900  | 8.51369900  |
| H | 3.61629000  | 12.42080200 | 12.18857900 | H  | 0.88194200  | 2.61075000  | 8.34226300  |
| C | 0.57023300  | 5.62653000  | 13.24174900 | H  | 1.70579500  | 1.06212300  | 8.07422800  |
| C | 2.12323200  | 1.95993700  | 10.02034400 | H  | 2.61111000  | 2.57643800  | 7.96950500  |
| C | 4.94319100  | 4.19988400  | 13.88978800 | C  | 9.77906900  | 12.75800200 | 15.90734600 |
| H | 3.96730400  | 4.25166900  | 14.37970100 | C  | 10.44908500 | 11.69580700 | 15.27230400 |
| H | 5.45203900  | 3.30483100  | 14.27428500 | C  | 10.03206200 | 11.22405100 | 14.04174600 |
| H | 4.76091400  | 4.03549900  | 12.82387000 | C  | 8.91451600  | 11.81362300 | 13.38897100 |
| C | 4.77377600  | 6.05341900  | 16.47187000 | C  | 8.24484000  | 12.89382700 | 14.02981200 |
| H | 3.73668100  | 5.85609600  | 16.18203600 | C  | 8.67978700  | 13.34944900 | 15.26226400 |
| H | 4.77687200  | 6.92442000  | 17.13405100 | H  | 10.11444800 | 13.12330000 | 16.87296700 |
| H | 5.10517400  | 5.19768700  | 17.07545900 | H  | 11.31465700 | 11.24195500 | 15.74922600 |
| C | 4.49212700  | 6.34335900  | 8.63771500  | H  | 10.56883900 | 10.41538800 | 13.55583900 |
| H | 3.85486700  | 5.74420200  | 8.00844200  | H  | 7.40957000  | 13.37782400 | 13.53261600 |
| C | -0.07521900 | 6.91408000  | 12.69306000 | H  | 8.16620000  | 14.18673700 | 15.72954000 |
| H | 0.68531800  | 7.66469900  | 12.47593600 | C  | 8.38929700  | 11.24379800 | 12.17237000 |
| H | -0.78453100 | 7.32910500  | 13.42009100 | F  | 9.28591700  | 10.59651900 | 11.40036100 |
| H | -0.62545300 | 6.70417600  | 11.76939300 | F  | 7.70185900  | 12.10668800 | 11.38652700 |
| C | 5.47633600  | 7.21756400  | 8.32341000  | F  | 7.36538100  | 10.17906700 | 12.40390200 |
| H | 5.87638000  | 7.50371800  | 7.36360400  | La | 4.98483100  | 7.97007400  | 13.18532500 |

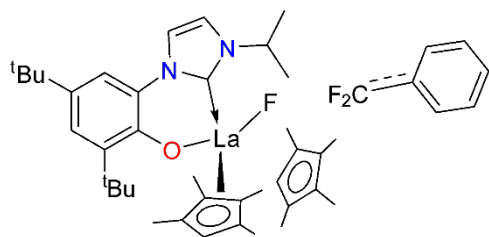

triplet IRC forward :

|   |             |             |             |   |            |             |             |
|---|-------------|-------------|-------------|---|------------|-------------|-------------|
| O | -1.78268300 | -0.71320100 | -0.31164400 | C | 3.32304700 | -0.08288100 | -3.88451500 |
| N | -0.65972100 | -1.70389100 | -2.70830600 | H | 3.57493300 | -1.01218700 | -3.36657900 |
| N | 0.94260500  | -0.41836700 | -3.32693000 | H | 4.16150600 | 0.61009300  | -3.77102100 |

|   |             |             |             |   |             |             |             |
|---|-------------|-------------|-------------|---|-------------|-------------|-------------|
| C | -2.73470100 | 2.96127500  | 1.63552900  | H | 3.21264600  | -0.30409600 | -4.95218500 |
| C | -1.36287800 | 2.98956500  | 1.11293800  | C | -3.91176300 | 3.48671700  | 0.88139000  |
| C | -2.69925000 | 2.39128100  | 2.88242200  | H | -4.07270000 | 2.93235600  | -0.05156300 |
| C | -1.63745300 | -2.42951600 | -1.95643700 | H | -3.77441300 | 4.53974600  | 0.60479300  |
| C | 0.33090300  | -0.90294000 | -2.21354200 | H | -4.83258300 | 3.41669800  | 1.46531700  |
| C | 1.98290900  | -2.45185700 | 0.68562300  | C | 1.66385900  | 1.83331700  | -4.02084200 |
| C | -0.51448400 | 2.39378900  | 2.06767800  | H | 1.51746400  | 1.67840800  | -5.09570700 |
| H | 0.57011500  | 2.39906200  | 2.03116100  | H | 2.45334500  | 2.57772100  | -3.89200400 |
| C | 1.33438100  | -1.45344600 | 2.63762700  | H | 0.74209200  | 2.24296700  | -3.59962300 |
| H | 0.81727400  | -1.25580300 | 3.57255100  | C | -3.40126900 | -1.69548200 | 2.12467200  |
| C | 2.86165300  | -1.35283600 | 0.93914400  | H | -3.02849200 | -2.66121300 | 2.48098600  |
| C | 2.46205800  | -0.73901700 | 2.15205500  | H | -4.02531500 | -1.26281700 | 2.91624400  |
| C | -1.30563600 | 2.04212700  | 3.17704900  | H | -2.55114000 | -1.03259000 | 1.95786800  |
| C | 1.04449100  | -2.52084500 | 1.75110400  | C | -5.46144800 | -2.71094800 | 1.20095400  |
| C | -2.25172800 | -1.83753300 | -0.81739700 | H | -6.11952300 | -2.87036500 | 0.34005800  |
| C | -2.01445800 | -3.68321600 | -2.43218500 | H | -6.04225100 | -2.18356600 | 1.96550700  |
| H | -1.45653400 | -4.10594300 | -3.26395900 | H | -5.19004400 | -3.68863600 | 1.61435000  |
| C | -3.73754000 | -3.76448300 | -0.80000300 | C | -4.63088300 | -6.39172000 | -1.63416900 |
| H | -4.58311800 | -4.27603800 | -0.35952600 | H | -4.42533900 | -6.51212300 | -0.56528200 |
| C | -3.38432600 | -2.51786600 | -0.27508300 | H | -4.85604800 | -7.38359800 | -2.04057700 |
| C | -3.06455700 | -4.39345500 | -1.85382200 | H | -5.53138200 | -5.77796200 | -1.74331300 |
| C | 2.05697300  | 0.54238200  | -3.30457900 | C | -0.84032100 | 1.47216200  | 4.47049500  |
| H | 2.20588300  | 0.77870700  | -2.24888100 | H | -1.33496800 | 0.51674100  | 4.68877100  |
| C | 4.05197700  | -0.94630700 | 0.11891400  | H | -1.08723200 | 2.14207900  | 5.30486000  |
| H | 4.06171800  | -1.44920600 | -0.85263500 | H | 0.23920900  | 1.30729700  | 4.47568600  |
| H | 4.99356200  | -1.20704900 | 0.62124500  | C | -3.82695100 | 2.14720900  | 3.83107000  |
| H | 4.07365200  | 0.13294500  | -0.06912300 | H | -4.78067500 | 2.49195900  | 3.42451200  |
| C | 3.14796700  | 0.41645000  | 2.82285800  | H | -3.66965200 | 2.66491500  | 4.78616100  |
| H | 3.32697600  | 1.25604100  | 2.14102500  | H | -3.93542400 | 1.08079100  | 4.06448800  |
| H | 4.12690700  | 0.12242800  | 3.22470700  | C | -2.23146700 | -6.73611900 | -2.20500500 |
| H | 2.55946100  | 0.79280000  | 3.66599400  | H | -1.35025600 | -6.37718200 | -2.74606500 |

|   |             |             |             |    |             |             |             |
|---|-------------|-------------|-------------|----|-------------|-------------|-------------|
| C | -0.96057500 | 3.62292600  | -0.17236000 | H  | -2.47100200 | -7.73676600 | -2.58444900 |
| H | -1.62666400 | 3.32036800  | -0.99007400 | H  | -1.95785900 | -6.82814800 | -1.14878300 |
| H | 0.06633100  | 3.36588000  | -0.43880800 | C  | -3.79692100 | -5.70110900 | -3.87554400 |
| H | -1.04298000 | 4.71713000  | -0.10199100 | H  | -4.65225700 | -5.03553500 | -4.03249200 |
| C | -4.22814800 | -1.86927300 | 0.83680900  | H  | -4.05882800 | -6.69162100 | -4.26610000 |
| C | -3.43346600 | -5.78697800 | -2.37997700 | H  | -2.96343600 | -5.32089500 | -4.47495500 |
| C | 2.11737300  | -3.46971900 | -0.41105900 | C  | 5.24812800  | 5.32790900  | 2.71280500  |
| H | 1.14679600  | -3.88716000 | -0.69726800 | C  | 5.84516000  | 4.20179100  | 2.13094300  |
| H | 2.75049200  | -4.31166400 | -0.09776300 | C  | 5.32932800  | 3.63965500  | 0.97718900  |
| H | 2.56623800  | -3.04692800 | -1.31478900 | C  | 4.17401200  | 4.20489300  | 0.36377400  |
| C | 0.02018000  | -3.59830600 | 1.96601900  | C  | 3.57325200  | 5.34992500  | 0.96230400  |
| H | -0.60110900 | -3.78649700 | 1.08262500  | C  | 4.11176600  | 5.89021700  | 2.11590500  |
| H | -0.65184600 | -3.33834600 | 2.78933100  | H  | 5.66201800  | 5.76088700  | 3.61823600  |
| H | 0.49684700  | -4.55250000 | 2.22787000  | H  | 6.72676600  | 3.76057600  | 2.58805900  |
| C | -0.65406500 | -1.70967100 | -4.09551300 | H  | 5.79790900  | 2.76949500  | 0.53025900  |
| H | -1.38477800 | -2.25165100 | -4.67348400 | H  | 2.69400900  | 5.78996400  | 0.50410500  |
| C | -4.73461100 | -0.49573300 | 0.35226700  | H  | 3.64373800  | 6.76384900  | 2.56168500  |
| H | -3.89926900 | 0.15681400  | 0.09374800  | C  | 3.64406600  | 3.65098800  | -0.79630400 |
| H | -5.32773400 | -0.01253700 | 1.13794700  | F  | 4.17616300  | 2.61502200  | -1.42645600 |
| H | -5.37409000 | -0.61258700 | -0.52969400 | F  | 2.60806100  | 4.15025600  | -1.44739600 |
| C | 0.36103200  | -0.90064400 | -4.48379700 | F  | 1.52297800  | 1.56938500  | -0.32130500 |
| H | 0.69540700  | -0.62579700 | -5.47170300 | La | 0.36077300  | -0.13020700 | 0.35953900  |

### IRC for the reaction of 7-Mg with PhCF<sub>3</sub>

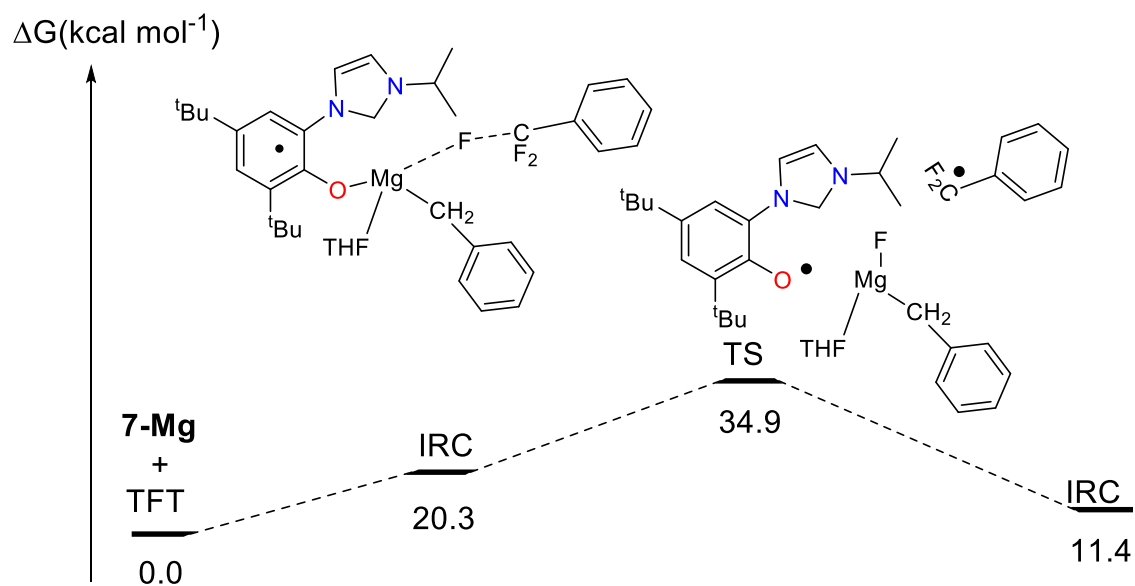

### S10.4 Unpaired Spin Density Plots

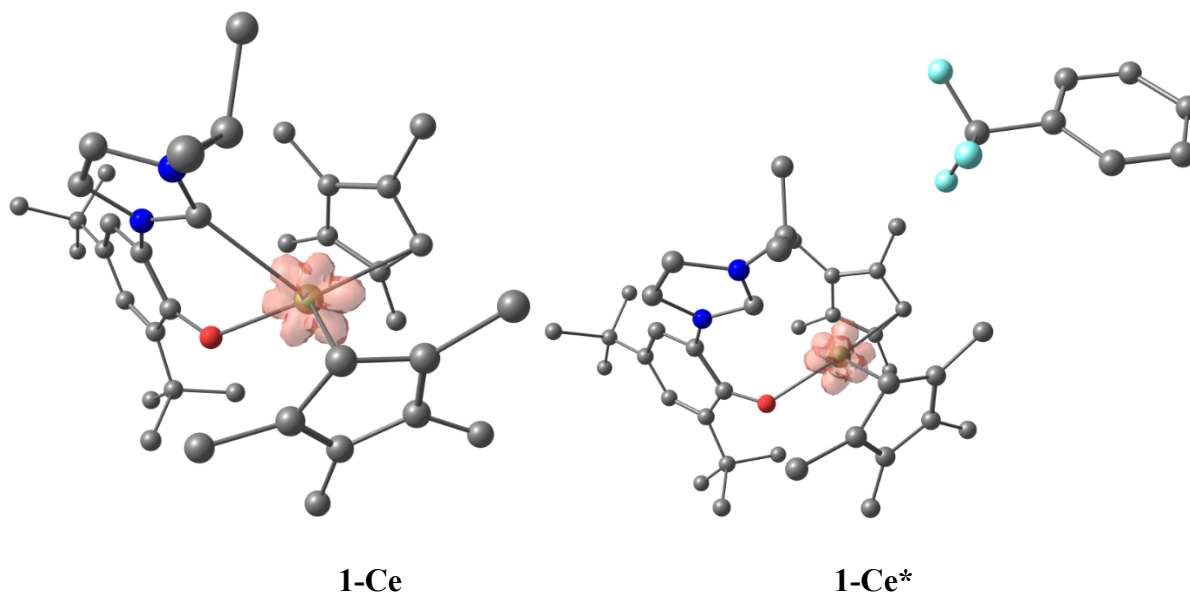

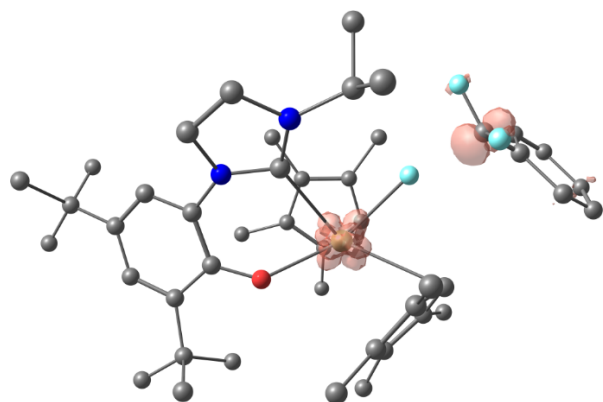

**TS1**

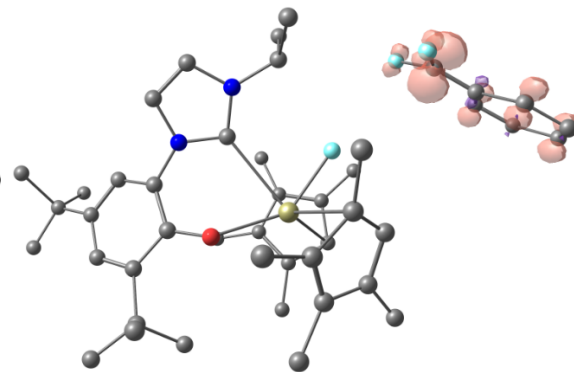

**INT1**

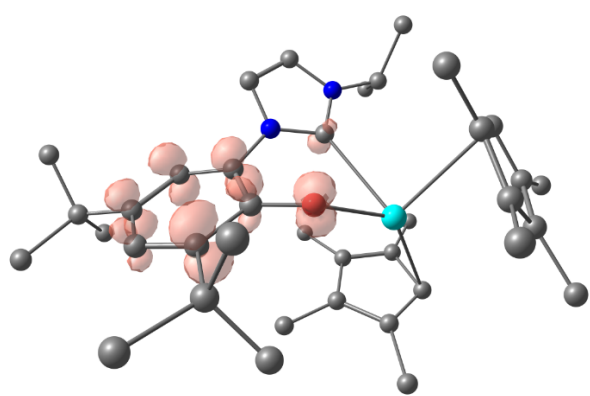

**1-La\***

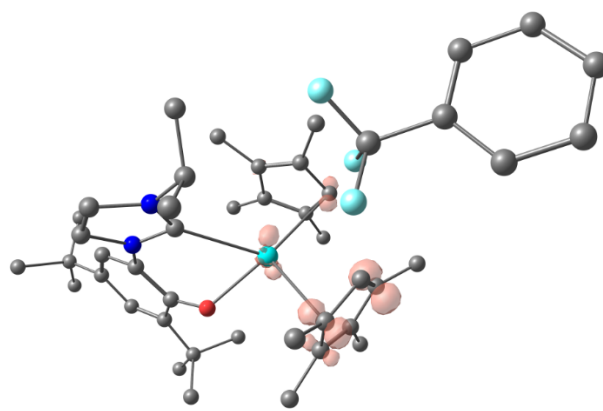

**INT6**

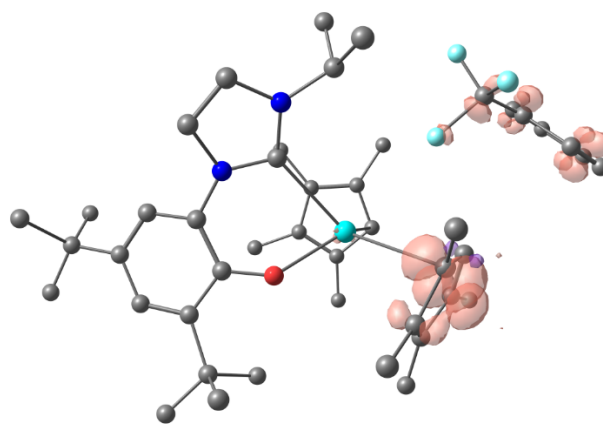

**TS4**

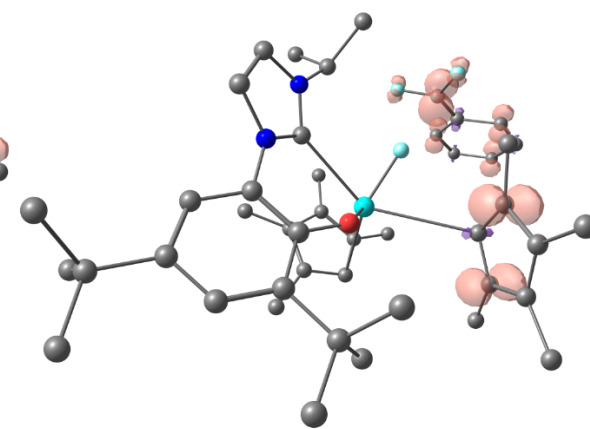

**INT7**

The unpaired spin density plot for photoexcited **1-La\*** shows that the unpaired spin density is mainly located at the O-NHC ligand (green circle) which then relocates on the Cp ring in the intermediate (red circle, **INT6**). Then at **TS4**, the unpaired spin density is still mainly located at the Cp (red circle) and some spin density starts to develop at the PhCF<sub>3</sub> (purple circle) as expected for the C-F activation step. Finally, heading towards the product, in **INT7** unpaired spin density is located on both the PhCF<sub>2</sub>• radical and the Cp ligand.

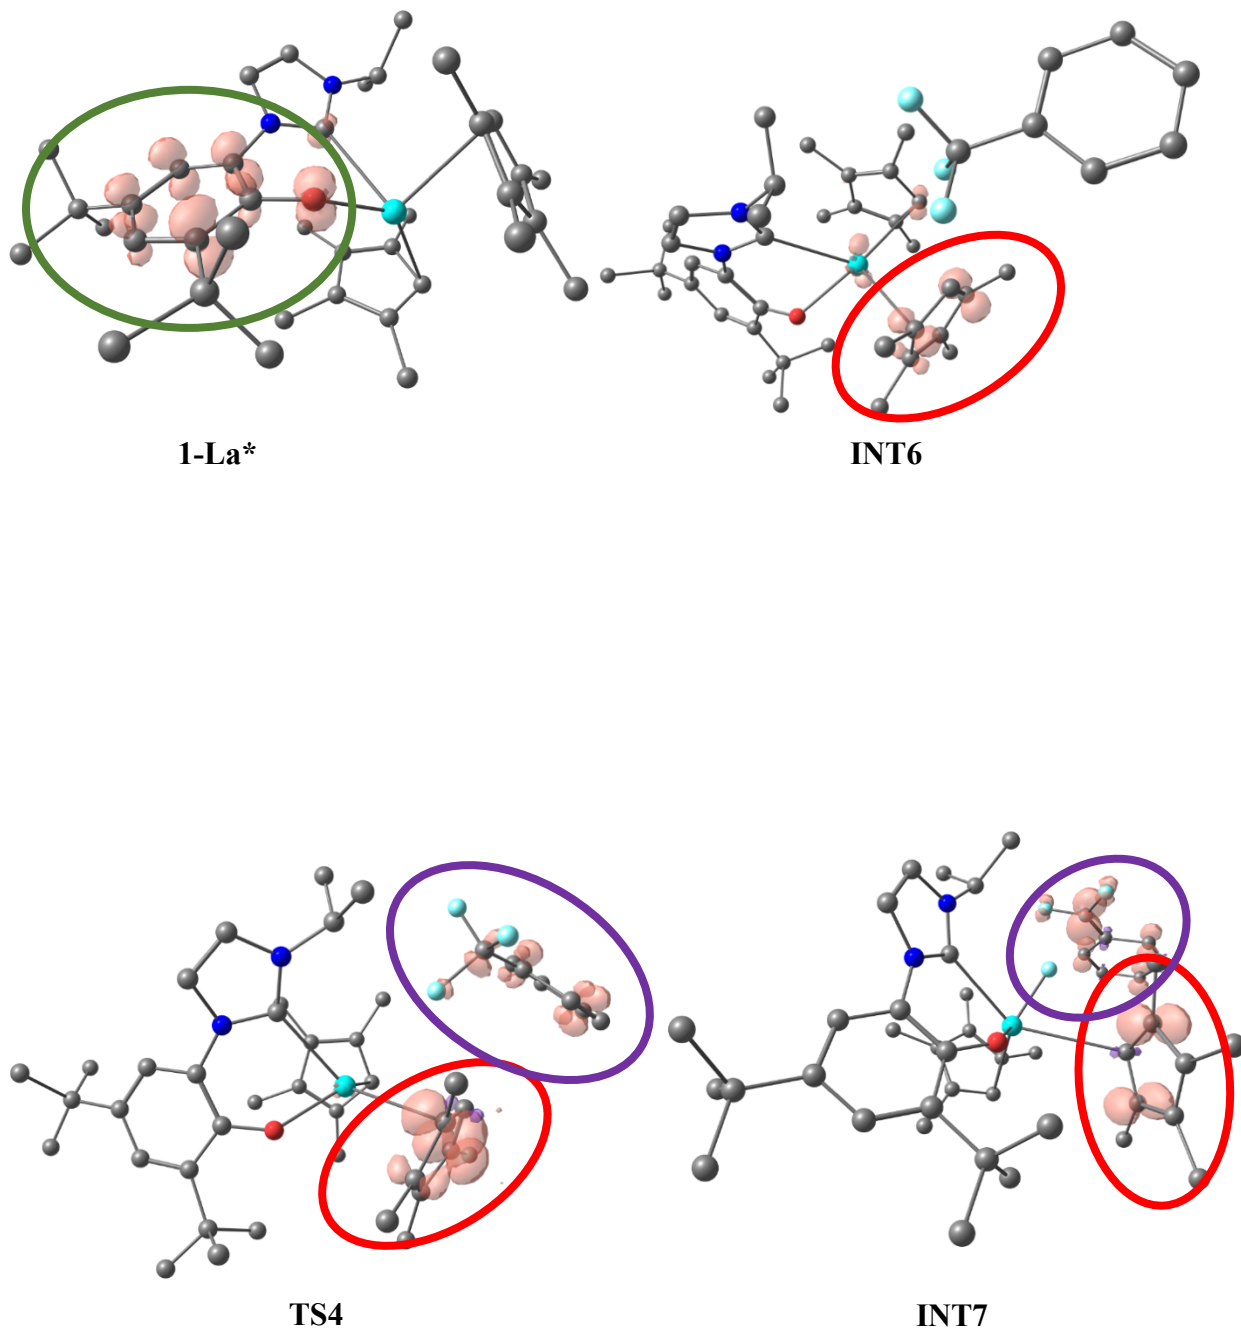

## **S11 References**

- (S1) Canestrari, D.; Lancianesi, S.; Badiola, E.; Strinna, C.; Ibrahim, H.; Adamo, M. F. A. Desulfurative Chlorination of Alkyl Phenyl Sulfides. *Org. Lett.* **2017**, *19*, 918–921.
- (S2) Sandoval, J. J.; Palma, P.; Álvarez, E.; Cámpora, J.; Rodríguez-Delgado, A. Mechanism of Alkyl Migration in Diorganomagnesium 2,6-Bis(Imino)Pyridine Complexes: Formation of Grignard-Type Complexes with Square-Planar Mg(II) Centers. *Organometallics*. **2016**, *35*, 3197–3204.
- (S3) Kong, Y.; Ren, H.; Xu, S.; Song, H.; Liu, B.; Wang, B. Synthesis, Structures, and Norbornene Polymerization Behavior of Bis(Aryloxo-N-Heterocyclic Carbene) Palladium Complexes. *Organometallics*. **2009**, *28*, 5934–5940.
- (S4) Evans, W. J.; Kozimor, S. A.; Ziller, J. W.; Fagin, A. A.; Bochkarev, M. N. Facile Syntheses of Unsolvated  $Uf_3$  and Tetramethylcyclopentadienyl Uranium Halides. *Inorg. Chem.* **2005**, *44*, 3993–4000.
- (S5) Windorff, C. J.; Dumas, M. T.; Ziller, J. W.; Gaunt, A. J.; Kozimor, S. A.; Evans, W. J. Small-Scale Metal-Based Syntheses of Lanthanide Iodide, Amide, and Cyclopentadienyl Complexes as Analogues for Transuranic Reactions. *Inorg. Chem.* **2017**, *56*, 11981–11989.
- (S6) Gompa, T. P.; Rice, N. T.; Russo, D. R.; Aguirre Quintana, L. M.; Yik, B. J.; Bacsa, J.; La Pierre, H. S. Diethyl Ether Adducts of Trivalent Lanthanide Iodides. *Dalton Trans.* **2019**, *48* (23), 8030–8033.
- (S7) Schumann, H.; Glanz, M.; Hemling, H. Metallorganische Verbindungen der Lanthanoide. *J. Organomet. Chem.* **1993**, *445*, C1–C3.
- (S8) Schumann, H.; Glanz, M.; Hemling, H.; Ekkehard Hahn, F. Metallorganische Verbindungen Der Lanthanoide. Tetramethylcyclopentadienyl-Komplexe Ausgewählter 4f-Elemente. *Z. Annorg. Allg. Chem.* **1995**, *621*, 341–345.
- (S9) Clavel, P.; Lessene, G.; Biran, C.; Bordeau, M.; Roques, N.; Trévin, S.; de Montauzon, D. Selective electrochemical synthesis and reactivity of functional benzylic fluorosilylsynthons. *J. Fluorine Chem.* **2001**, *107*, 301–310.
- (S10) Hoye, T. R.; Eklov, B. M.; Ryba, T. D.; Voloshin, M.; Yao, L. J. NoD NMR (NoDeuterium Proton NMR) Spectroscopy: A Simple yet Powerful Method for Analyzing Reaction and Reagent Solutions. *Org. Lett.* **2004**, *6*, 953–956.
- (S11) Jenkins, T. F.; Woen, D. H.; Mohanam, L. N.; Ziller, J. W.; Furche, F.; Evans, W. J. Tetramethylcyclopentadienyl Ligands Allow Isolation of Ln (II) Ions across the Lanthanide Series in  $[K(2.2.2\text{-Cryptand})][(\text{C}_5\text{Me}_4\text{H})_3\text{Ln}]$  Complexes. *Organometallics*. **2018**, *37* (21), 3863–3873.
- (S13) Dolomanov, O. V.; Bourhis, L. J.; Gildea, R. J.; Howard, J. A. K.; Puschmann, H., OLEX2: a complete structure solution, refinement and analysis program. *J. Appl. Crystallogr.* **2009**, *42*, 339–341.
- (S14) Sheldrick, G., SHELXT - Integrated space-group and crystal-structure determination. *Acta Crystallographica Section A*. **2015**, *71*, 3–8.
- (S15) Clark, R. C.; Reid, J. S., The analytical calculation of absorption in multifaceted crystals. *Acta Crystallographica Section A*. **1995**, *51*, 887–897.
- (S16) Fauq, A. H.; Singh, R. P.; Meshri, D. T.; Diethylaminosulfurtrifluoride. In Encyclopedia of Reagents for Organic Synthesis, (Ed.). **2006**.



- (S17) Umemoto, T.; Singh, R. P.; Xu, Y.; Saito, N. Discovery of 4-Tert-Butyl-2,6-Dimethylphenylsulfur Trifluoride as a Deoxofluorinating Agent with High Thermal Stability as Well as Unusual Resistance to Aqueous Hydrolysis, and Its Diverse Fluorination Capabilities Including Deoxofluoro-Arylsulfonylation with High Stereoselectivity. *J. Am. Chem. Soc.* **2010**, *132*, 18199–18205.
- (S18) Becke, A. D. Density-functional thermochemistry. III. The role of exact exchange. *J. Chem. Phys.* **1993**, *98*, 5648-5652.
- (S19) Perdew, J. P.; Wang, Y. Accurate and simple analytic representation of the electron-gas correlation energy. *Phys. Rev. B.* **1992**, *45*, 13244-13249.
- (S20) a) Kuchle, W.; Dolg, M.; Stoll, H.; Preuss, H. Energy-adjusted pseudopotentials for the actinides. Parameter sets and test calculations for thorium and thorium monoxide. *J. Chem. Phys.* **1994**, *100*, 7535-7543. b) Cao, X. Y.; Dolg, M.; Stoll, H. Valence basis sets for relativistic energy-consistent small-core actinide pseudopotentials. *J. Chem. Phys.* **2003**, *118*, 487-497.
- (S21) a) Ditchfield, R.; Hehre, W. J.; Pople, J. A. Self-Consistent Molecular-Orbital Methods. IX. An Extended Gaussian-Type Basis for Molecular-Orbital Studies of Organic Molecules. *J. Chem. Phys.* **1971**, *54*, 724–728. b) Hehre, W. J.; Ditchfield, R.; Pople, J. A. Self-Consistent Molecular Orbital Methods. XII. Further Extensions of Gaussian-Type Basis Sets for Use in Molecular Orbital Studies of Organic Molecules. *J. Chem. Phys.* **1972**, *56*, 2257–2261. c) Hariharan, P. C.; Pople, J. A. The influence of polarization functions on molecular orbital hydrogenation energies. *Theor. Chim. Acta.* **1973**, *28*, 213–223.
- (S22) Gaussian 09, Revision A.02, Frisch, M. J.; Trucks, G. W.; Schlegel, H. B.; Scuseria, G. E.; Robb, M. A.; Cheeseman, J. R.; Scalmani, G.; Barone, V.; Mennucci, B.; Petersson, G. A.; Nakatsuji, H.; Caricato, M.; Li, X.; Hratchian, H. P.; Izmaylov, A. F.; Bloino, J.; Zheng, G.; Sonnenberg, J. L.; Hada, M.; Ehara, M.; Toyota, K.; Fukuda, R.; Hasegawa, J.; Ishida, M.; Nakajima, T.; Honda, Y.; Kitao, O.; Nakai, H.; Vreven, T.; Montgomery, Jr. J. A.; Peralta, J. E.; Ogliaro, F.; Bearpark, M.; Heyd, J. J.; Brothers, E.; Kudin, K. N.; Staroverov, V. N.; Kobayashi, R.; Normand, J.; Raghavachari, K.; Rendell, A.; Burant, J. C.; Iyengar, S. S.; Tomasi, J.; Cossi, M.; Rega, N.; Millam, J. M.; Klene, M.; Knox, J. E.; Cross, J. B.; Bakken, V.; Adamo, C.; Jaramillo, J.; Gomperts, R.; Stratmann, R. E.; Yazyev, O.; Austin, A. J.; Cammi, R.; Pomelli, C.; Ochterski, J. W.; Martin, R. L.; Morokuma, K.; Zakrzewski, V. G.; Voth, G. A.; Salvador, P.; Dannenberg, J. J.; Dapprich, S.; Daniels, A. D.; Farkas, O.; Foresman, J. B.; Ortiz, J. V.; Cioslowski, J.; Fox, D. J. Gaussian, Inc., Wallingford.
- (S23) Maron, L.; Eisenstein, O. Do F Electrons Play a Role in the Lanthanide–Ligand Bonds? A DFT Study of  $\text{Ln}(\text{NR}_2)_3$ ; R = H,  $\text{SiH}_3$ . *J. Phys. Chem. A.* **2000**, *104* (30), 7140–7143.
- (S24) Werkema, E. L.; Messines, E.; Perrin, L.; Maron, L.; Eisenstein, O.; Andersen, R. A. Hydrogen for Fluorine Exchange in  $\text{CH}_4\text{-}_x\text{F}_x$  by Monomeric  $[\text{1,2,4-(Me}_3\text{C)}_3\text{C}_5\text{H}_2]_2\text{CeH}$ : Experimental and Computational Studies. *J. Am. Chem. Soc.* **2005**, *127* (21), 7781–7795.
- (S25) Maron, L.; Werkema, E. L.; Perrin, L.; Eisenstein, O.; Andersen, R. A. Hydrogen for Fluorine Exchange in  $\text{C}_6\text{F}_6$  and  $\text{C}_6\text{F}_5\text{H}$  by Monomeric  $[\text{1,3,4-(Me}_3\text{C)}_3\text{C}_5\text{H}_2]_2\text{CeH}$ : Experimental and Computational Studies. *J. Am. Chem. Soc.* **2004**, *127* (1), 279–292.
